# Supplementary material for: MFF budding from mitochondria regulates melanosome size and maturation
Source: Research Square preprint supplement (doi:10.21203/rs.3.rs-4545422/v1), 2024-07-03
Supplement: Supplementary file 1 [file 51361d9bc1d1161ff4981d17.xlsx]

## Sheet: Analysis melan-a
Digested_01	Digested_02	Digested_03	Digested_04	Total_01	Total_02	Total_03	Total_04	Selection	Peptides	Razor + unique peptides	Unique peptides	Sequence coverage [%]	Unique + razor sequence coverage [%]	Unique sequence coverage [%]	Mol. weight [kDa]	Q-value	Score	Intensity	MS/MS count	Protein IDs	Majority protein IDs	Protein names	Gene names
NaN	NaN	NaN	NaN	26.3739	25.0361	25.413	25.6964	+	5	5	5	7.6	7.6	7.6	106.91	0	25.905	433330000	9	Q8BGQ7	Q8BGQ7	Alanine--tRNA ligase, cytoplasmic	Aars
NaN	NaN	NaN	NaN	25.5247	26.1892	26.3265	25.5183	+	6	6	6	15.5	15.5	15.5	67.314	0	63.803	778240000	9	P61222	P61222	ATP-binding cassette sub-family E member 1	Abce1
NaN	NaN	NaN	NaN	25.7053	25.347	25.8377	25.4055	+	6	6	6	13.1	13.1	13.1	94.944	0	27.078	498100000	5	Q6P542	Q6P542	ATP-binding cassette sub-family F member 1	Abcf1
NaN	NaN	NaN	NaN	26.3489	25.8611	26.4494	26.3337	+	4	4	4	76.5	76.5	76.5	9.0583	0	32.153	687040000	7	E9QMV2;Q4KML4;A0A1W2P7X0	E9QMV2;Q4KML4;A0A1W2P7X0	Costars family protein ABRACL	Abracl
NaN	NaN	NaN	NaN	27.7391	27.5076	26.6475	27.4079	+	10	10	10	34	34	34	47.874	0	162.39	1744600000	17	Q9DBL1;E9Q5L3;A0A140LHL4	Q9DBL1;E9Q5L3	Short/branched chain specific acyl-CoA dehydrogenase, mitochondrial	Acadsb
NaN	NaN	NaN	NaN	26.7826	26.1859	25.8584	26.3345	+	12	4	4	38	20.5	20.5	42.281	0	45.049	771880000	9	Q8R5C5;E0CZD4;E0CYB4	Q8R5C5	Beta-centractin	Actr1b
NaN	NaN	NaN	NaN	27.0199	26.9113	27.0197	27.1927	+	7	7	7	14.8	14.8	14.8	83.967	0	50.88	1241100000	8	O35598;E9PYF2;D3Z1E6	O35598;E9PYF2;D3Z1E6	Disintegrin and metalloproteinase domain-containing protein 10	Adam10
NaN	NaN	NaN	NaN	25.2653	25.0898	25.4086	26.6895	+	6	4	4	10.1	8.8	8.8	80.646	0	5.4393	436240000	6	Q9QYC0;F8WHZ9;F8WGR0;Q9QYC0-2;E9Q1K3;D3Z0T1;F6RDR0	Q9QYC0;F8WHZ9;F8WGR0;Q9QYC0-2;E9Q1K3	Alpha-adducin	Add1
NaN	NaN	NaN	NaN	26.0716	25.6106	25.5506	25.4431	+	3	3	3	13.9	13.9	13.9	31.097	0	27.485	467670000	4	Q8R3V2;Q8R010	Q8R3V2;Q8R010	Aminoacyl tRNA synthase complex-interacting multifunctional protein 2	Aimp2
NaN	NaN	NaN	NaN	26.0644	26.0119	27.3766	27.2107	+	7	7	7	21.8	21.8	21.8	35.732	0	28.194	1029800000	11	P45376;D3YVJ7	P45376;D3YVJ7	Aldose reductase	Akr1b1;Akr1b3
NaN	NaN	NaN	NaN	26.6218	27.1765	26.0704	26.3729	+	8	8	8	14.5	14.5	14.5	101.59	0	23.774	1146900000	10	Q8K009;D3Z6B9;A0A0N4SVT2;A0A0N4SW56;Q8R0Y6	Q8K009;D3Z6B9	Mitochondrial 10-formyltetrahydrofolate dehydrogenase	Aldh1l2
NaN	NaN	NaN	NaN	25.3417	25.4452	25.4203	25.2968	+	4	4	4	13.7	13.7	13.7	47.404	0	8.816	429840000	8	Q9DBE8;F6RBY3	Q9DBE8;F6RBY3	Alpha-1,3/1,6-mannosyltransferase ALG2	Alg2
NaN	NaN	NaN	NaN	25.8413	26.073	25.9874	25.6751	+	4	4	4	13.1	13.1	13.1	69.262	0	59.392	625100000	5	Q8BH79-2;Q8BH79;A0A1L1SR14;A0A1L1SS60;Q8BH79-3;Q8BH79-4	Q8BH79-2;Q8BH79;A0A1L1SR14;A0A1L1SS60;Q8BH79-3;Q8BH79-4	Anoctamin-10	Ano10
NaN	NaN	NaN	NaN	26.9375	26.1142	26.9968	26.996	+	8	8	8	21.9	21.9	21.9	52.27	0	18.931	1052900000	14	A0A2C9F2D2;Q07076;A0A286YCW4	A0A2C9F2D2;Q07076	Annexin A7	Anxa7
NaN	NaN	NaN	NaN	27.4859	27.8063	27.8851	27.1768	+	25	8	8	34.7	19.2	19.2	103.93	0	129.49	2048600000	17	O35643;Q5SVG5;Q5SVG4	O35643;Q5SVG5;Q5SVG4	AP-1 complex subunit beta-1	Ap1b1
NaN	NaN	NaN	NaN	26.1484	27.0312	27.0121	26.4497	+	10	10	10	11.4	11.4	11.4	135.08	0	48.06	1135900000	15	O54774	O54774	AP-3 complex subunit delta-1	Ap3d1
NaN	NaN	NaN	NaN	25.7247	26.3684	26.145	25.8941	+	6	6	5	24.2	24.2	21.8	46.936	0	12.788	853600000	10	Q9JKC8;H7BWY2;A0A286YDZ6;D3YWU3;D3YXV9;D6RI63	Q9JKC8;H7BWY2;A0A286YDZ6	AP-3 complex subunit mu-1	Ap3m1
NaN	NaN	NaN	NaN	27.4298	27.2845	26.5209	26.395	+	10	10	10	45.7	45.7	45.7	29.26	0	109.28	1408000000	18	Q78IK4;B1AV14	Q78IK4;B1AV14	MICOS complex subunit Mic27	Apool
NaN	NaN	NaN	NaN	26.9325	25.0261	25.5682	25.2534	+	4	4	4	33.3	33.3	33.3	20.396	0	48.331	489310000	6	P61750;E9Q798;F6UFB9;P84084;Q8BSL7;P84078;P61205	P61750;E9Q798;F6UFB9;P84084;Q8BSL7;P84078;P61205	ADP-ribosylation factor 4;ADP-ribosylation factor 5;ADP-ribosylation factor 2;ADP-ribosylation factor 1;ADP-ribosylation factor 3	Arf4;Arf5;Arf2;Arf1;Arf3
NaN	NaN	NaN	NaN	26.7209	25.3827	25.565	26.6579	+	4	4	4	40	40	40	20.082	0	10.739	592740000	8	P62331	P62331	ADP-ribosylation factor 6	Arf6
NaN	NaN	NaN	NaN	27.6459	27.0843	26.9724	27.4378	+	9	9	9	31.9	31.9	31.9	50.41	0	30.744	1679100000	16	Q5FWK3;A2AH25	Q5FWK3;A2AH25	Rho GTPase-activating protein 1	Arhgap1
NaN	NaN	NaN	NaN	25.6925	25.9314	25.0566	25.0255	+	5	5	5	29	29	29	31.071	0	19.404	812450000	6	A0A494BAB5;Q9D5T0;A0A494B9L7;A0A494B9Y0	A0A494BAB5;Q9D5T0;A0A494B9L7;A0A494B9Y0	ATPase family AAA domain-containing protein 1	Atad1
NaN	NaN	NaN	NaN	25.9482	25.9675	25.8443	25.4473	+	7	7	7	14.4	14.4	14.4	60.231	0	18.431	816590000	9	E9PYT3;Q91YH5;Q91YH5-2;A0A494BAX8;A0A494BAW9;A0A494BAU1	E9PYT3;Q91YH5;Q91YH5-2	Atlastin-3	Atl3
NaN	NaN	NaN	NaN	24.3926	23.8344	24.1002	24.0362	+	3	3	3	23.1	23.1	23.1	20.934	0	6.3522	165610000	5	A0A0G2JFS2;P15920	A0A0G2JFS2;P15920	V-type proton ATPase 116 kDa subunit a isoform 2	Atp6v0a2
NaN	NaN	NaN	NaN	28.0675	28.5524	29.1265	29.1862	+	8	8	8	48.3	48.3	48.3	13.724	0	91.537	4206600000	18	Q9CR51	Q9CR51	V-type proton ATPase subunit G 1	Atp6v1g1
NaN	NaN	NaN	NaN	27.6922	27.7023	26.6054	26.4489	+	5	5	5	40.3	40.3	40.3	13.779	0	86.482	1719200000	11	P01887	P01887	Beta-2-microglobulin	B2m
NaN	NaN	NaN	NaN	24.9688	24.129	24.6275	25.0479	+	2	2	2	8.8	8.8	8.8	57.187	0	15.38	224000000	4	Q9DBJ3	Q9DBJ3	Brain-specific angiogenesis inhibitor 1-associated protein 2-like protein 1	Baiap2l1
NaN	NaN	NaN	NaN	24.1165	24.3659	23.9944	23.7946	+	2	2	2	9.1	9.1	9.1	38.111	0	6.7496	168420000	3	A0A0A0MQB0;Q4PJX1-3;Q4PJX1;Q4PJX1-2	A0A0A0MQB0;Q4PJX1-3;Q4PJX1;Q4PJX1-2	Protein odr-4 homolog	BC003331;Odr4
NaN	NaN	NaN	NaN	25.5246	25.6018	25.8401	25.9093	+	4	4	4	46.7	46.7	46.7	8.7608	0	8.4239	752230000	6	Q91VR8	Q91VR8	Protein BRICK1	Brk1
NaN	NaN	NaN	NaN	25.8988	25.906	26.5793	25.7517	+	5	5	5	16	16	16	51.209	0	71.354	595520000	11	A0A087WQS2;Q9CQC6;A0A087WS48;A0A087WPF9	A0A087WQS2;Q9CQC6	Basic leucine zipper and W2 domain-containing protein 1	Bzw1
NaN	NaN	NaN	NaN	26.988	26.0967	26.2502	26.0911	+	5	5	5	27.1	27.1	27.1	26.51	0	231.09	765750000	10	Q9CXW3;A0A0A6YY29	Q9CXW3;A0A0A6YY29	Calcyclin-binding protein	Cacybp
NaN	NaN	NaN	NaN	28.088	27.1727	27.2081	28.5656	+	5	5	5	23	23	23	51.688	0	23.844	1885600000	17	E9PYN1;Q8R5M8-4;Q8R5M8-3;Q8R5M8-2;Q8R5M8;A0A668KLV1;E0CY16;Q8R5M8-7;Q8R5M8-6;Q8R5M8-5	E9PYN1;Q8R5M8-4;Q8R5M8-3;Q8R5M8-2;Q8R5M8;A0A668KLV1;E0CY16;Q8R5M8-7;Q8R5M8-6;Q8R5M8-5	Cell adhesion molecule 1	Cadm1
NaN	NaN	NaN	NaN	25.1544	25.0129	25.4322	25.3707	+	8	3	3	24.2	8.3	8.3	55.96	0	5.357	397170000	3	Q923T9-3;Q923T9-2;Q923T9;A0A2I3BQP6;Q5SVI9;Q5SVJ1;Q5SVI3;Q5SVI0;Q5SVI2;Q68EG2;Q5SVI1;Q5SVJ0;P28652;A0A286YCB8;A0A286YDL6;A0A286YCW8;A0A286YDK9;A0A286YCH4	Q923T9-3;Q923T9-2;Q923T9;A0A2I3BQP6;Q5SVI9;Q5SVJ1;Q5SVI3;Q5SVI0;Q5SVI2;Q68EG2;Q5SVI1;Q5SVJ0;P28652	Calcium/calmodulin-dependent protein kinase type II subunit gamma;Calcium/calmodulin-dependent protein kinase type II subunit beta	Camk2g;Camk2b
NaN	NaN	NaN	NaN	25.4471	24.3721	25.2846	25.3528	+	5	5	5	11.1	11.1	11.1	79.871	0	23.587	500350000	10	O08529	O08529	Calpain-2 catalytic subunit	Capn2
NaN	NaN	NaN	NaN	25.4086	24.9885	25.0137	25.3724	+	3	3	3	20.6	20.6	20.6	29.133	0	10.399	414220000	4	J3QN06;J3QMM7;K3W4M4;Q9CZ42-2;Q9CZ42-3;Q9CZ42	J3QN06;J3QMM7;K3W4M4;Q9CZ42-2;Q9CZ42-3;Q9CZ42	ATP-dependent (S)-NAD(P)H-hydrate dehydratase	Carkd
NaN	NaN	NaN	NaN	25.4371	26.5697	25.5705	25.9147	+	4	4	4	32.7	32.7	32.7	15.661	0	9.761	833880000	5	Q9D1L0;B2RPU8;D3Z5B1	Q9D1L0;B2RPU8;D3Z5B1	Coiled-coil-helix-coiled-coil-helix domain-containing protein 2	Chchd2;Zbed5
NaN	NaN	NaN	NaN	24.7116	25.3031	24.673	24.2918	+	4	4	4	15.8	15.8	15.8	35.54	0	20.364	408660000	5	A0A0R4J058;A0A0R4J242;Q922Q9-2;Q922Q9;A0A1B0GSH5;D3YWG2;G8JL55	A0A0R4J058;A0A0R4J242;Q922Q9-2;Q922Q9;A0A1B0GSH5;D3YWG2;G8JL55	Chitinase domain-containing protein 1	Chid1
NaN	NaN	NaN	NaN	23.3404	24.0688	23.2028	23.003	+	2	2	2	3.3	3.3	3.3	100.1	0	4.3759	147520000	2	Q5DTK1	Q5DTK1	Chondroitin sulfate synthase 3	Chsy3
NaN	NaN	NaN	NaN	24.6764	25.468	25.2036	24.9619	+	4	4	4	27.5	27.5	27.5	18.799	0	5.6789	383920000	4	A0A0N4SVS6;P53996-2;P53996-3;P53996	A0A0N4SVS6;P53996-2;P53996-3;P53996	Cellular nucleic acid-binding protein	Cnbp
NaN	NaN	NaN	NaN	24.766	25.1206	24.6882	24.5938	+	3	3	3	22.1	22.1	22.1	22.037	0	15.887	329350000	4	Q63829	Q63829	COMM domain-containing protein 3	Commd3
NaN	NaN	NaN	NaN	25.6952	25.8227	25.9587	25.7454	+	4	4	4	8.1	8.1	8.1	107.06	0	9.358	755620000	5	Q9JIF7	Q9JIF7	Coatomer subunit beta	Copb1
NaN	NaN	NaN	NaN	26.9335	26.7792	26.5782	26.472	+	8	8	5	13.8	13.8	9.6	97.512	0	60.141	1019600000	20	Q9QZE5;Q7TNQ1	Q9QZE5	Coatomer subunit gamma-1	Copg1
NaN	NaN	NaN	NaN	24.5948	24.8986	24.6342	24.2765	+	5	5	5	11.9	11.9	11.9	58.792	0	9.4239	264000000	6	H3BJ71;H3BKL6;H3BL19;H3BJI6;H3BK44;E9PY90;H3BK48;E9Q3S2;H3BKH2;H3BJS0;A0A1W2P711;Q91ZV0-3;Q91ZV0;H3BJS5;H3BJ35;H3BJY7	H3BJ71;H3BKL6;H3BL19;H3BJI6;H3BK44;E9PY90;H3BK48;E9Q3S2;H3BKH2;H3BJS0;A0A1W2P711;Q91ZV0-3;Q91ZV0;H3BJS5	Melanoma inhibitory activity protein 2	Ctage5;Mia2
NaN	NaN	NaN	NaN	27.1107	26.5669	26.3466	26.7033	+	5	5	5	13.2	13.2	13.2	52.376	0	42.01	965680000	10	P97821;D3Z220	P97821	Dipeptidyl peptidase 1;Dipeptidyl peptidase 1 exclusion domain chain;Dipeptidyl peptidase 1 heavy chain;Dipeptidyl peptidase 1 light chain	Ctsc
NaN	NaN	NaN	NaN	25.9939	25.9519	25.7282	26.1219	+	4	4	4	37.6	37.6	37.6	28.09	0	38.04	585720000	5	Q9D172;A0A1W2P7B6;A0A1W2P870	Q9D172;A0A1W2P7B6;A0A1W2P870	ES1 protein homolog, mitochondrial	D10Jhu81e
NaN	NaN	NaN	NaN	24.5493	23.8098	24.6964	24.5541	+	2	2	2	6.1	6.1	6.1	52.241	0	3.8509	195880000	4	Q8CBY8-2;Q8CBY8	Q8CBY8-2;Q8CBY8	Dynactin subunit 4	Dctn4
NaN	NaN	NaN	NaN	23.7317	24.5959	23.8276	23.7941	+	4	4	4	17.2	17.2	17.2	33.225	0	17.078	258900000	5	Z4YKT6;Q99J47-2;Q99J47	Z4YKT6;Q99J47-2;Q99J47	Dehydrogenase/reductase SDR family member 7B	Dhrs7b
NaN	NaN	NaN	NaN	26.8207	25.7891	26.7891	27.0329	+	7	7	7	14	14	14	91.622	0	11.072	906360000	10	D3Z3B8;H7BWY4;E9Q9H0;Q811D0-2;Q811D0;Q811D0-3;F6UDT8;S4R2T8;A0A338P7H1;A0A338P713;E9Q3Z8;B1AR31;A0A338P6L4;A0A338P6H5;A0A338P6E5;G3UZL5;D3YUZ8;A0A338P6I6;E9Q2L2;A0A571BEK3;A0A571BEZ4;A0A338P6J0;Q91XM9-5;Q62108-3;Q62108;Q62108-2;Q91XM9-3;Q91XM9-6;Q91XM9-8;Q91XM9;Q91XM9-2;Q91XM9-4;Q91XM9-7	D3Z3B8;H7BWY4;E9Q9H0;Q811D0-2;Q811D0;Q811D0-3;F6UDT8;S4R2T8	Disks large homolog 1	Dlg1
NaN	NaN	NaN	NaN	26.4641	26.5114	26.1819	26.1709	+	5	5	5	19.7	19.7	19.7	45.745	0	52.262	771510000	6	Q9QYJ0	Q9QYJ0	DnaJ homolog subfamily A member 2	Dnaja2
NaN	NaN	NaN	NaN	22.7887	23.3811	23.3236	23.667	+	3	3	3	1.8	1.8	1.8	215.08	0	5.0485	117240000	2	Q8BUR4;A0A1B0GSI1;Q8BUR4-2	Q8BUR4	Dedicator of cytokinesis protein 1	Dock1
NaN	NaN	NaN	NaN	27.0919	27.0272	26.7083	26.6565	+	5	5	5	33.8	33.8	33.8	29.174	0	8.6601	1142300000	8	O70152;A2BDX2	O70152;A2BDX2	Dolichol-phosphate mannosyltransferase subunit 1	Dpm1
NaN	NaN	NaN	NaN	23.7423	24.4512	23.8271	23.6607	+	2	2	2	36.4	36.4	36.4	11.213	0	9.9764	164200000	2	Q99LT0	Q99LT0	Protein dpy-30 homolog	Dpy30
NaN	NaN	NaN	NaN	27.6983	26.7104	27.4739	27.7679	+	8	8	8	28.6	28.6	28.6	68.393	0	56.936	1471400000	12	O88487;A2BFF8;Q3TPJ8;A2BFF9;A2BFF5;Q3TYJ3;D3Z0M6;O88485-2;O88485	O88487;A2BFF8;Q3TPJ8;A2BFF9;A2BFF5	Cytoplasmic dynein 1 intermediate chain 2	Dync1i2
NaN	NaN	NaN	NaN	27.4944	26.706	27.2746	27.4973	+	8	8	7	25.8	25.8	22.9	56.614	0	68.799	1277400000	13	Q8R1Q8	Q8R1Q8	Cytoplasmic dynein 1 light intermediate chain 1	Dync1li1
NaN	NaN	NaN	NaN	26.3755	26.3721	25.3319	26.0707	+	4	4	4	64.3	64.3	64.3	12.242	0	323.31	670120000	7	A0A338P7B7;P51807	A0A338P7B7;P51807	Dynein light chain Tctex-type 1	Dynlt1
NaN	NaN	NaN	NaN	23.9528	24.8659	24.3281	24.1834	+	5	5	5	4.1	4.1	4.1	203.91	0	70.057	261390000	6	Q6PDI5-2;Q6PDI5;A2ALV7;A2ALW1;A2ALV8;A2ALV6;A2ALV9	Q6PDI5-2;Q6PDI5;A2ALV7	Proteasome-associated protein ECM29 homolog	Ecm29;AI314180
NaN	NaN	NaN	NaN	24.5101	25.2099	25.76	24.8931	+	4	4	4	4.2	4.2	4.2	141.95	0	13.608	364630000	6	D6RE33;A0A0R4J1Q0;G5E896;Q3UJB9-2;Q3UJB9;F6V5I7;F6ZJ27	D6RE33;A0A0R4J1Q0;G5E896;Q3UJB9-2;Q3UJB9;F6V5I7;F6ZJ27	Enhancer of mRNA-decapping protein 4	Edc4
NaN	NaN	NaN	NaN	26.082	24.7063	25.7252	26.1028	+	4	4	4	20	20	20	26.8	0	8.6021	599090000	10	Q8C845;Q9D8Y0;Q9D4J1	Q8C845;Q9D8Y0	EF-hand domain-containing protein D2	Efhd2
NaN	NaN	NaN	NaN	25.3854	26.1046	25.9345	25.6658	+	8	8	8	17	17	17	78.301	0	41.064	614010000	15	Q9DBM2	Q9DBM2	Peroxisomal bifunctional enzyme;Enoyl-CoA hydratase/3,2-trans-enoyl-CoA isomerase;3-hydroxyacyl-CoA dehydrogenase	Ehhadh
NaN	NaN	NaN	NaN	25.6163	26.8938	26.5774	25.4096	+	8	8	8	20.6	20.6	20.6	58.279	0	94.373	980720000	12	Q03963	Q03963	Interferon-induced, double-stranded RNA-activated protein kinase	Eif2ak2
NaN	NaN	NaN	NaN	25.0906	25.931	26.0209	25.1452	+	8	8	8	34.1	34.1	34.1	38.092	0	51.685	529310000	8	Q99L45	Q99L45	Eukaryotic translation initiation factor 2 subunit 2	Eif2s2
NaN	NaN	NaN	NaN	25.8948	26.1451	26.2315	25.7135	+	7	7	7	33.1	33.1	33.1	35.638	0	22.34	715520000	8	Q9Z1D1	Q9Z1D1	Eukaryotic translation initiation factor 3 subunit G	Eif3g
NaN	NaN	NaN	NaN	25.0755	25.5347	25.6705	24.9123	+	3	3	3	19.3	19.3	19.3	25.086	0	23.305	465310000	5	Q9DBZ5;A0A140LJ59;Q3TY56;Q9DBZ5-2	Q9DBZ5;A0A140LJ59	Eukaryotic translation initiation factor 3 subunit K	Eif3k
NaN	NaN	NaN	NaN	24.4595	25.4453	25.8022	24.7559	+	12	3	3	37.8	12	12	46.402	0	40.18	397630000	7	P10630;P10630-2;Q8BTU6;E9Q561;A0A338P6X5;A2AFK7;E9PV04;A0A0N4SVP8;Q91VC3;D6RJ60;D6RJ11;A0A0N4SVM5	P10630;P10630-2;Q8BTU6;E9Q561;A0A338P6X5	Eukaryotic initiation factor 4A-II;Eukaryotic initiation factor 4A-II, N-terminally processed	Eif4a2
NaN	NaN	NaN	NaN	24.7667	24.7198	25.284	24.823	+	3	3	3	7.7	7.7	7.7	48.968	0	6.5254	274440000	6	P59325;Q8BVV6;A0A1Y7VLL6;A0A1Y7VKT5;A0A1Y7VLQ0;A0A1Y7VLK2;A0A1Y7VNP4;A0A1Y7VJG2	P59325;Q8BVV6	Eukaryotic translation initiation factor 5	Eif5
NaN	NaN	NaN	NaN	25.0206	26.6155	25.492	25.3212	+	7	7	7	29.1	29.1	29.1	36.169	0	33.376	861310000	9	P70372	P70372	ELAV-like protein 1	Elavl1
NaN	NaN	NaN	NaN	25.5447	27.0452	27.0981	26.5706	+	2	2	2	20.3	20.3	20.3	26.31	0	75.419	978210000	6	Q9EP72	Q9EP72	ER membrane protein complex subunit 7	Emc7
NaN	NaN	NaN	NaN	25.7599	26.1717	25.6331	25.0246	+	5	5	5	31.7	31.7	31.7	29.435	0	45.086	738360000	12	O08579;Q3THM8;B7FAU5;I7HJS1;D6RFS0	O08579;Q3THM8;B7FAU5;I7HJS1	Emerin	Emd
NaN	NaN	NaN	NaN	26.2925	26.3497	26.1019	25.2989	+	8	8	8	13.8	13.8	13.8	94.138	0	38.801	799400000	15	Q3TZZ7;Q3TZZ7-2;A0A1Y7VM39	Q3TZZ7;Q3TZZ7-2	Extended synaptotagmin-2	Esyt2
NaN	NaN	NaN	NaN	26.5108	26.5559	26.4212	27.2038	+	8	8	8	24.3	24.3	24.3	49.03	0	18.934	1414900000	14	Q8BWY3	Q8BWY3	Eukaryotic peptide chain release factor subunit 1	Etf1
NaN	NaN	NaN	NaN	26.1715	24.6801	25.0243	25.8992	+	3	3	3	26.7	26.7	26.7	15.137	0	4.1466	373000000	6	Q05816	Q05816	Fatty acid-binding protein, epidermal	Fabp5
NaN	NaN	NaN	NaN	25.0179	25.6143	24.9453	24.7345	+	4	4	4	11.2	11.2	11.2	48.138	0	7.5087	422260000	7	A0A494BBC6;Q920L1;A0A494BAD7	A0A494BBC6;Q920L1;A0A494BAD7	Fatty acid desaturase 1	Fads1
NaN	NaN	NaN	NaN	24.5838	25.0075	24.1879	24.1205	+	3	3	3	17.4	17.4	17.4	23.578	0	19.955	244320000	5	Q8BR63	Q8BR63	Protein FAM177A1	Fam177a1
NaN	NaN	NaN	NaN	26.2637	24.723	25.7354	24.2877	+	2	2	2	4.3	4.3	4.3	95.222	0	14.785	469020000	6	A0A0G2JEA5;Q920E5;A0A0G2JDJ5;A0A0G2JEB3	A0A0G2JEA5;Q920E5;A0A0G2JDJ5;A0A0G2JEB3	Farnesyl pyrophosphate synthase	Fdps
NaN	NaN	NaN	NaN	24.0901	24.8147	24.3602	23.9838	+	3	3	3	6.3	6.3	6.3	82.249	0	4.4535	211120000	3	Q80YW9;A0A6I8MWZ0;Q6P9Q6;Q6P9Q6-2;Q80YW6	Q80YW9;A0A6I8MWZ0;Q6P9Q6;Q6P9Q6-2	Peptidyl-prolyl cis-trans isomerase;FK506-binding protein 15	Fkbp15
NaN	NaN	NaN	NaN	25.8203	25.3339	26.2961	26.3071	+	3	3	3	31.5	31.5	31.5	11.922	0	16.094	551250000	9	P26883	P26883	Peptidyl-prolyl cis-trans isomerase FKBP1A	Fkbp1a
NaN	NaN	NaN	NaN	27.0424	26.7291	26.2902	26.3855	+	6	6	6	28.4	28.4	28.4	43.528	0	47.004	957150000	9	O35465;O35465-2;F6WP10	O35465;O35465-2	Peptidyl-prolyl cis-trans isomerase FKBP8	Fkbp8
NaN	NaN	NaN	NaN	26.0619	24.3916	25.0733	25.9915	+	5	5	5	4.8	4.8	4.8	144.8	0	10.451	383660000	8	Q9JJ28	Q9JJ28	Protein flightless-1 homolog	Flii
NaN	NaN	NaN	NaN	24.2754	25.2627	24.9254	24.3486	+	6	6	6	17.6	17.6	17.6	61.447	0	10.38	370840000	5	A2AJ72;Q3TIX6;A0A0A6YVV5;F7AM43;A0A0A6YY39	A2AJ72;Q3TIX6;A0A0A6YVV5		Fubp3
NaN	NaN	NaN	NaN	24.8209	24.5959	25.0569	24.7565	+	2	2	2	6.5	6.5	6.5	55.532	0	3.6976	238650000	2	Q8BHC9	Q8BHC9	Alpha-(1,3)-fucosyltransferase 11	Fut11
NaN	NaN	NaN	NaN	27.1471	26.6946	25.7154	25.361	+	5	5	5	16.3	16.3	16.3	57.621	0	79.005	968190000	9	P17439;A0A0G2JDK2	P17439;A0A0G2JDK2	Glucosylceramidase	Gba
NaN	NaN	NaN	NaN	26.2497	26.0037	25.8795	26.2343	+	13	7	7	36.2	24.4	24.4	50.521	0	77.766	562400000	8	P50396;D6RI86;B7FAU8	P50396	Rab GDP dissociation inhibitor alpha	Gdi1
NaN	NaN	NaN	NaN	24.9622	24.6522	24.7833	25.4889	+	3	3	3	7	7	7	84.194	0	11.943	322380000	4	Q5F258;Q68FF6	Q5F258;Q68FF6	ARF GTPase-activating protein GIT1	Git1
NaN	NaN	NaN	NaN	26.0722	26.0722	27.0783	25.7819	+	4	4	4	33.8	33.8	33.8	17.09	0	29.971	771680000	10	Q9CYL5;B1AWD6	Q9CYL5;B1AWD6	Golgi-associated plant pathogenesis-related protein 1	Glipr2
NaN	NaN	NaN	NaN	25.6551	25.8451	24.7373	25.2003	+	4	4	4	32.9	32.9	32.9	16.292	0	32.968	555480000	6	Q80Y14;A0A1Y7VN70	Q80Y14;A0A1Y7VN70	Glutaredoxin-related protein 5, mitochondrial	Glrx5
NaN	NaN	NaN	NaN	26.6046	25.6737	26.323	26.9833	+	16	5	5	42.4	18.9	18.9	40.538	0	86.886	956980000	10	Q9DC51	Q9DC51	Guanine nucleotide-binding protein G(k) subunit alpha	Gnai3
NaN	NaN	NaN	NaN	26.5725	27.3229	27.1071	28.3672	+	5	5	5	79.4	79.4	79.4	7.3184	0	18.321	1796200000	14	Q80SZ7;D3Z7Q3;A0A3B2WD42	Q80SZ7	Guanine nucleotide-binding protein G(I)/G(S)/G(O) subunit gamma-5	Gng5
NaN	NaN	NaN	NaN	25.5987	25.7955	25.906	25.1071	+	7	7	7	12.8	12.8	12.8	76.869	0	11.368	539540000	8	P98192;Q05DV2	P98192;Q05DV2	Dihydroxyacetone phosphate acyltransferase	Gnpat
NaN	NaN	NaN	NaN	25.265	26.8635	25.556	25.5424	+	11	11	11	5	5	5	365.29	0	31.24	989670000	16	E9QAH1;E9PVZ8;Q9CTU9	E9QAH1;E9PVZ8		Golgb1
NaN	NaN	NaN	NaN	23.7029	24.9664	24.2568	24.0768	+	4	4	4	9.1	9.1	9.1	79.904	0	18.435	254390000	4	D3YVW2;Q8BXA1;F6RUD1	D3YVW2;Q8BXA1;F6RUD1	Golgi integral membrane protein 4	Golim4
NaN	NaN	NaN	NaN	25.8463	26.4421	26.0651	26.0709	+	4	4	4	31.5	31.5	31.5	19.571	0	80.32	769630000	7	A2A9I0;O35166	A2A9I0;O35166	Golgi SNAP receptor complex member 2	Gosr2
NaN	NaN	NaN	NaN	24.5464	24.8831	25.1255	25.1398	+	4	4	4	10.1	10.1	10.1	60.995	0	9.5158	328530000	5	D3YZ54;Q9QXE0;E9PWM4;A0A2I3BRS0	D3YZ54;Q9QXE0;E9PWM4	2-hydroxyacyl-CoA lyase 1	Hacl1
NaN	NaN	NaN	NaN	24.0866	24.809	24.6737	24.2599	+	6	6	6	7.6	7.6	7.6	86.142	0	9.2649	276360000	8	Q3UMA3;Q99LI8;F6VV02;B1ATY9	Q3UMA3;Q99LI8;F6VV02	Hepatocyte growth factor-regulated tyrosine kinase substrate	Hgs
NaN	NaN	NaN	NaN	24.5222	24.9728	24.3012	24.7318	+	3	3	3	25.2	25.2	25.2	17.32	0	7.3176	259410000	3	Q9D0S9	Q9D0S9	Histidine triad nucleotide-binding protein 2, mitochondrial	Hint2
NaN	NaN	NaN	NaN	24.831	24.4825	23.8738	24.2101	+	2	2	2	12	12	12	34.238	0	62.252	187660000	3	P38060	P38060	Hydroxymethylglutaryl-CoA lyase, mitochondrial	Hmgcl
NaN	NaN	NaN	NaN	25.9502	26.9445	26.3718	25.8412	+	9	9	9	31.9	31.9	31.9	32.46	0	53.41	1053100000	10	O88569-3;O88569-2;O88569;A0A0N4SUM2	O88569-3;O88569-2;O88569;A0A0N4SUM2	Heterogeneous nuclear ribonucleoproteins A2/B1	Hnrnpa2b1
NaN	NaN	NaN	NaN	25.3497	26.8153	25.5	24.9993	+	3	3	3	15.7	15.7	15.7	34.476	0	7.8798	731550000	4	A2AL12;Q8BG05-2;Q8BG05	A2AL12;Q8BG05-2;Q8BG05	Heterogeneous nuclear ribonucleoprotein A3	Hnrnpa3
NaN	NaN	NaN	NaN	26.2787	27.7207	26.4911	26.0618	+	8	8	8	26.4	26.4	26.4	33.816	0	49.02	1647800000	9	Q80XR6;Q20BD0;Q99020	Q80XR6;Q20BD0;Q99020	Heterogeneous nuclear ribonucleoprotein A/B	Hnrnpab
NaN	NaN	NaN	NaN	25.1203	25.4593	25.412	25.8747	+	4	4	4	21.5	21.5	21.5	32.88	0	19.923	472830000	9	Q9EQ06;Q9EQ06-2;A8Y5N4;Q8VCR2-2;Q8VCR2	Q9EQ06;Q9EQ06-2	Estradiol 17-beta-dehydrogenase 11	Hsd17b11
NaN	NaN	NaN	NaN	25.75	26.2661	25.5849	25.5294	+	5	5	5	15.4	15.4	15.4	62.747	0	23.968	734590000	8	P03975	P03975	IgE-binding protein	Iap
NaN	NaN	NaN	NaN	24.5873	24.215	24.7574	25.7924	+	2	2	2	6.3	6.3	6.3	46.674	0	5.3093	259770000	4	O88844;D3YVY3;A0A087WPT4;A0A087WRS9	O88844;D3YVY3;A0A087WPT4;A0A087WRS9	Isocitrate dehydrogenase [NADP] cytoplasmic	Idh1
NaN	NaN	NaN	NaN	27.4824	27.5896	26.5246	26.0739	+	9	9	9	32.3	32.3	32.3	42.785	0	100.5	1895300000	15	P70404	P70404	Isocitrate dehydrogenase [NAD] subunit gamma 1, mitochondrial	Idh3g
NaN	NaN	NaN	NaN	25.5191	25.3018	25.5093	24.9193	+	3	3	3	11.4	11.4	11.4	53.737	0	24.392	417290000	4	Q64282	Q64282	Interferon-induced protein with tetratricopeptide repeats 1	Ifit1
NaN	NaN	NaN	NaN	27.4038	27.5489	27.2916	27.2527	+	10	10	10	27.1	27.1	27.1	68.155	0	143.38	1733400000	15	Q8BU33;A0A1W2P8D6;A0A1W2P727;A0A1W2P8E1;Q8BU33-3;Q8BU33-2	Q8BU33;A0A1W2P8D6;A0A1W2P727;A0A1W2P8E1;Q8BU33-3;Q8BU33-2	Acetolactate synthase-like protein	Ilvbl
NaN	NaN	NaN	NaN	27.1935	26.9515	25.9692	27.0367	+	3	3	3	27.7	27.7	27.7	22.417	0	50.809	1115900000	10	P85094	P85094	Isochorismatase domain-containing protein 2A, mitochondrial	Isoc2a
NaN	NaN	NaN	NaN	24.9101	24.8535	24.5906	24.0651	+	4	4	4	8	8	8	88.051	0	9.5392	244230000	5	Q6PE70;G5E8F8;O70309;O70309-2;A0A338P795	Q6PE70;G5E8F8;O70309;O70309-2;A0A338P795	Integrin beta;Integrin beta-5	Itgb5
NaN	NaN	NaN	NaN	25.2385	25.2883	24.6252	24.4505	+	9	8	8	4	3.7	3.7	304.27	0	12.394	290210000	5	P70227	P70227	Inositol 1,4,5-trisphosphate receptor type 3	Itpr3
NaN	NaN	NaN	NaN	25.3452	25.4881	26.5919	27.0541	+	6	6	6	11.2	11.2	11.2	104.84	0	16.828	687930000	12	A2A7S8;A2A7S8-4;A2A7S8-2;A2A7S8-3	A2A7S8;A2A7S8-4;A2A7S8-2;A2A7S8-3	Uncharacterized protein KIAA1522	Kiaa1522
NaN	NaN	NaN	NaN	28.2156	27.7634	27.3556	27.5958	+	6	6	6	70.4	70.4	70.4	13.48	0	90.861	2106400000	20	Q9JHS3;D3YTS4	Q9JHS3;D3YTS4	Ragulator complex protein LAMTOR2	Lamtor2
NaN	NaN	NaN	NaN	25.6845	23.8772	24.0461	24.1737	+	4	4	4	4.6	4.6	4.6	134.19	0	64.586	212380000	5	Q8BMJ2;A0A494BBF9	Q8BMJ2;A0A494BBF9	Leucine--tRNA ligase, cytoplasmic	Lars
NaN	NaN	NaN	NaN	24.6137	24.9484	25.1542	24.5658	+	3	3	3	11	11	11	41.839	0	40.378	388950000	6	A0A3B2WDB3;Q3UN02;B0V2Q9	A0A3B2WDB3;Q3UN02	Lysocardiolipin acyltransferase 1	Lclat1
NaN	NaN	NaN	NaN	28.5894	28.3976	28.1055	28.0798	+	10	10	10	28.6	28.6	28.6	64.49	0	147.95	3151600000	22	Q07797;E9Q5X5;F6VRP8	Q07797	Galectin-3-binding protein	Lgals3bp
NaN	NaN	NaN	NaN	27.6223	26.773	27.2928	27.6825	+	6	6	6	40.1	40.1	40.1	21.834	0	49.541	1494000000	6	O88952	O88952	Protein lin-7 homolog C	Lin7c
NaN	NaN	NaN	NaN	25.6988	27.0009	25.6453	27.0664	+	9	9	9	37.5	37.5	37.5	45.325	0	42.976	938070000	11	Q9Z0M5	Q9Z0M5	Lysosomal acid lipase/cholesteryl ester hydrolase	Lipa
NaN	NaN	NaN	NaN	25.5922	26.2405	26.3645	25.4828	+	6	6	6	23.8	23.8	23.8	47.499	0	13.906	768920000	10	Q7TQ95;A2ASL8;A2ASM0;A2ASM1	Q7TQ95;A2ASL8;A2ASM0	Protein lunapark	Lnp
NaN	NaN	NaN	NaN	25.6888	25.1962	25.5019	25.2282	+	4	4	4	6.3	6.3	6.3	83.14	0	15.736	478430000	8	Q8BLN5	Q8BLN5	Lanosterol synthase	Lss
NaN	NaN	NaN	NaN	24.181	24.4127	24.5489	24.3936	+	4	4	4	14.8	14.8	14.8	38.611	0	7.3458	251490000	5	Q7TNC4-2;Q7TNC4-3;Q7TNC4-4;Q7TNC4;E9Q715;Q05CX5	Q7TNC4-2;Q7TNC4-3;Q7TNC4-4;Q7TNC4;E9Q715;Q05CX5	Putative RNA-binding protein Luc7-like 2	Luc7l2
NaN	NaN	NaN	NaN	23.8691	25.2156	23.7466	23.6469	+	4	4	4	6.4	6.4	6.4	100.85	0	10.63	224470000	3	A0A0R4J092;Q8K2I4;D6RGR1	A0A0R4J092;Q8K2I4	Beta-mannosidase	Manba
NaN	NaN	NaN	NaN	24.492	24.5899	24.3285	25.599	+	5	5	2	10.9	10.9	6.4	43.474	0	6.7745	392670000	5	P31938;A0A1W2P7V9	P31938	Dual specificity mitogen-activated protein kinase kinase 1	Map2k1
NaN	NaN	NaN	NaN	25.0068	24.7168	25.1808	25.4547	+	5	4	4	22.9	19.7	19.7	42.401	0	17.359	311010000	8	D3Z3G6;Q63844;A0A0U1RPX4;A0A0U1RPZ0	D3Z3G6;Q63844;A0A0U1RPX4	Mitogen-activated protein kinase;Mitogen-activated protein kinase 3	Mapk3
NaN	NaN	NaN	NaN	26.6129	26.9139	25.9837	26.0585	+	2	2	2	33.1	33.1	33.1	16.168	0	22.53	909710000	4	Q8K5B2;D3Z6A4;D3Z1G3	Q8K5B2;D3Z6A4;D3Z1G3	Multiple coagulation factor deficiency protein 2 homolog	Mcfd2
NaN	NaN	NaN	NaN	27.3139	26.3583	26.4183	26.6889	+	3	3	3	23.5	23.5	23.5	12.504	0	9.2849	1149900000	11	P34884	P34884	Macrophage migration inhibitory factor	Mif
NaN	NaN	NaN	NaN	24.0134	25.4196	24.7684	24.2278	+	7	7	7	8.9	8.9	8.9	113.6	0	58.748	349450000	7	D3Z3E8;E9PW39;D3YVL0;P23249	D3Z3E8;E9PW39;D3YVL0;P23249	Putative helicase MOV-10	Mov10
NaN	NaN	NaN	NaN	23.4444	24.1188	25.0824	25.755	+	4	4	3	10.6	10.6	8.2	60.924	0	7.1826	246990000	7	Q9JLB0-2;Q9JLB0	Q9JLB0-2;Q9JLB0	MAGUK p55 subfamily member 6	Mpp6
NaN	NaN	NaN	NaN	24.7862	24.4901	24.9196	25.0101	+	6	6	6	11	11	11	96.201	0	12.675	281090000	8	F6S5I0;F6RND9;P97434-3;P97434;P97434-5;P97434-2;Q5SWZ5;P97434-4	F6S5I0;F6RND9;P97434-3;P97434;P97434-5;P97434-2;Q5SWZ5;P97434-4	Myosin phosphatase Rho-interacting protein	Mprip
NaN	NaN	NaN	NaN	25.1615	25.8095	25.6689	25.1343	+	5	5	5	5.2	5.2	5.2	181.79	0	50.365	508730000	11	E0CZ22;D3Z624	E0CZ22		Mroh1
NaN	NaN	NaN	NaN	26.5508	25.9449	26.7638	26.8364	+	3	3	3	50	50	50	12.861	0	10.225	823030000	9	P62774	P62774	Myotrophin	Mtpn
NaN	NaN	NaN	NaN	25.4237	25.7669	24.551	24.8998	+	5	5	5	32.7	32.7	32.7	29.758	0	37.898	473750000	6	O88441	O88441	Metaxin-2	Mtx2
NaN	NaN	NaN	NaN	27.9412	27.8811	27.9654	26.7322	+	11	11	11	21.5	21.5	21.5	62.779	0	74.039	2452900000	25	D3YU17;Q8VCM8	D3YU17;Q8VCM8	Nicalin	Ncln
NaN	NaN	NaN	NaN	27.9686	27.1672	26.2458	26.6385	+	7	7	7	34.9	34.9	34.9	40.603	0	62.01	1335300000	13	Q99LC3;A0A087WR38	Q99LC3	NADH dehydrogenase [ubiquinone] 1 alpha subcomplex subunit 10, mitochondrial	Ndufa10
NaN	NaN	NaN	NaN	25.4839	25.9468	25.375	25.5187	+	4	4	4	49.1	49.1	49.1	13.36	0	17.075	600830000	5	Q9CPP6;D3YTQ8	Q9CPP6;D3YTQ8	NADH dehydrogenase [ubiquinone] 1 alpha subcomplex subunit 5	Ndufa5
NaN	NaN	NaN	NaN	24.9144	25.6724	24.4632	24.5308	+	3	3	3	19	19	19	21.984	0	20.626	361940000	3	Q9CQJ8	Q9CQJ8	NADH dehydrogenase [ubiquinone] 1 beta subcomplex subunit 9	Ndufb9
NaN	NaN	NaN	NaN	26.1914	25.8052	24.9813	25.2982	+	4	4	4	15.8	15.8	15.8	49.573	0	65.567	493940000	6	D3YXT0;Q91WD5;A0A0A6YW30	D3YXT0;Q91WD5	NADH dehydrogenase [ubiquinone] iron-sulfur protein 2, mitochondrial	Ndufs2
NaN	NaN	NaN	NaN	25.5941	25.7823	24.9029	25.5421	+	4	4	4	16.9	16.9	16.9	50.498	0	14.486	483260000	4	Q3U422	Q3U422		Ndufv3
NaN	NaN	NaN	NaN	26.6637	25.4373	26.0132	26.2925	+	3	3	3	18	18	18	24.727	0	7.5248	549100000	6	Q8CJ26;A0A0G2JH13	Q8CJ26	Death domain-containing membrane protein NRADD	Nradd
NaN	NaN	NaN	NaN	27.3419	27.1088	27.0673	27.1795	+	10	10	10	40.6	40.6	40.6	40.685	0	49.698	1417000000	17	Q9R1J0	Q9R1J0	Sterol-4-alpha-carboxylate 3-dehydrogenase, decarboxylating	Nsdhl
NaN	NaN	NaN	NaN	26.5995	26.6327	26.0698	26.0143	+	10	10	10	17.5	17.5	17.5	113.23	0	92.035	865010000	12	H7BX01;P58281;P58281-2;E0CXD1;F6U775	H7BX01;P58281;P58281-2;E0CXD1	Dynamin-like 120 kDa protein, mitochondrial;Dynamin-like 120 kDa protein, form S1	Opa1
NaN	NaN	NaN	NaN	25.2521	25.3471	25.1646	24.6868	+	4	4	4	11.5	11.5	11.5	69.763	0	22.635	430200000	5	Q8K2C7-2;Q8K2C7	Q8K2C7-2;Q8K2C7	Protein OS-9	Os9
NaN	NaN	NaN	NaN	24.676	24.881	23.9904	24.38	+	3	3	3	4.1	4.1	4.1	107.79	0	7.1394	254360000	4	Q91XL9;D3Z7I9;D3YZ66;D3Z754;A0A3Q4EG54;A0A3Q4EI24;Q3V156;Q91XL9-2;A0A3Q4EG41;A0A3Q4L2S6;Q8K2D2;Q91XL9-3	Q91XL9;D3Z7I9;D3YZ66;D3Z754;A0A3Q4EG54;A0A3Q4EI24;Q3V156;Q91XL9-2	Oxysterol-binding protein-related protein 1;Oxysterol-binding protein	Osbpl1a
NaN	NaN	NaN	NaN	25.7066	25.3258	25.7152	25.6881	+	4	4	4	14.5	14.5	14.5	41.323	0	4.2505	434100000	7	D3Z5U5;Q9Z257;Q9JJX6-3;Q9JJX6;D3YYR5;Q9Z256;Q9JJX6-4;Q9JJX6-2	D3Z5U5;Q9Z257;Q9JJX6-3;Q9JJX6;D3YYR5;Q9Z256;Q9JJX6-4;Q9JJX6-2	P2X purinoceptor;P2X purinoceptor 4	P2rx4
NaN	NaN	NaN	NaN	25.3711	24.633	25.1286	25.5116	+	3	3	3	16.5	16.5	16.5	24.715	0	4.7165	312690000	6	Q8VE70;F8WI55;E0CY82	Q8VE70;F8WI55	Programmed cell death protein 10	Pdcd10
NaN	NaN	NaN	NaN	25.4688	26.7388	25.8996	25.7692	+	7	7	7	30.9	30.9	30.9	41.207	0	97.254	982030000	10	Q9R0A0;D6RH82	Q9R0A0	Peroxisomal membrane protein PEX14	Pex14
NaN	NaN	NaN	NaN	24.3253	24.603	24.6394	24.8834	+	3	3	2	5.6	5.6	3.2	85.359	0	12.471	240730000	5	P12382;P47857;P47857-2;P47857-3	P12382	ATP-dependent 6-phosphofructokinase, liver type	Pfkl
NaN	NaN	NaN	NaN	27.3856	27.3582	27.8673	27.0689	+	10	10	10	24.3	24.3	24.3	64.647	0	154.01	1719300000	16	Q7M6Y3-2;Q7M6Y3-3;Q7M6Y3-4;Q7M6Y3-6;Q7M6Y3-5;Q7M6Y3;A0A140LHQ8;A0A1L1SUR7;A0A140LHG9;A0A087WSI9;Q3TWS4;E9Q9A3;E9QQ05;A0A5F8MPL3;E9QLK9;Q61548-3;Q61548-2;Q61548	Q7M6Y3-2;Q7M6Y3-3;Q7M6Y3-4;Q7M6Y3-6;Q7M6Y3-5;Q7M6Y3;A0A140LHQ8;A0A1L1SUR7	Phosphatidylinositol-binding clathrin assembly protein	Picalm
NaN	NaN	NaN	NaN	25.525	24.9362	25.5045	25.2731	+	3	3	3	13.8	13.8	13.8	40.862	0	6.0819	333840000	5	E9Q421;Q8BXX3;Q8BL63;Q9CXY9;A0A0G2JEZ9	E9Q421;Q8BXX3;Q8BL63;Q9CXY9	GPI-anchor transamidase	Pigk
NaN	NaN	NaN	NaN	24.4026	24.2482	24.742	24.7521	+	3	3	3	8.8	8.8	8.8	47.335	0	5.29	209630000	3	Q91XU3	Q91XU3	Phosphatidylinositol 5-phosphate 4-kinase type-2 gamma	Pip4k2c
NaN	NaN	NaN	NaN	25.4189	25.914	25.5133	25.3574	+	46	2	2	81.4	3.2	3.2	57.984	0.00052274	2.8393	451900000	3	P52480-2	P52480-2	Pyruvate kinase PKM	Pkm
NaN	NaN	NaN	NaN	25.9993	25.6575	25.7008	26.8728	+	6	6	6	21.1	21.1	21.1	47.262	0	55.876	662770000	6	Q9DBG5;A0A3B2WCW2	Q9DBG5	Perilipin-3	Plin3
NaN	NaN	NaN	NaN	26.4897	26.417	26.1348	25.9721	+	7	7	7	25.6	25.6	25.6	49.429	0	18.864	894660000	10	Q8VHI3;A0A1W2P7Z1;A0A1W2P6H4;A0A1W2P844	Q8VHI3;A0A1W2P7Z1	GDP-fucose protein O-fucosyltransferase 2	Pofut2
NaN	NaN	NaN	NaN	25.9484	25.0444	24.9794	24.8725	+	4	4	4	13	13	13	40.742	0	28.127	288630000	8	Q9CR16	Q9CR16	Peptidyl-prolyl cis-trans isomerase D	Ppid
NaN	NaN	NaN	NaN	24.9742	24.1792	25.2568	25.1898	+	3	3	3	6.6	6.6	6.6	65.629	0	5.9651	394890000	8	Q8BQ30;Q8BQ30-2;A0A087WRI9	Q8BQ30;Q8BQ30-2;A0A087WRI9	Phostensin	Ppp1r18
NaN	NaN	NaN	NaN	25.4647	24.0066	24.9504	25.3036	+	3	3	3	14.5	14.5	14.5	43.165	0	13.755	285380000	6	A0A0A6YX73;Q8K1M3;A0A0A6YY28;P12367	A0A0A6YX73;Q8K1M3		Prkar2a
NaN	NaN	NaN	NaN	25.6306	24.1999	24.5011	25.431	+	3	3	3	11.5	11.5	11.5	46.167	0	10.449	249420000	5	P31324;H3BK84	P31324;H3BK84	cAMP-dependent protein kinase type II-beta regulatory subunit	Prkar2b
NaN	NaN	NaN	NaN	24.3201	25.6938	25.1684	24.9035	+	6	6	6	3.3	3.3	3.3	298.11	0	44.277	438190000	5	S4R294;Q3TLH4-5;Q3TLH4;S4R2J9;A0A0A0MQ79;S4R2L9;S4R209;S4R298	S4R294;Q3TLH4-5;Q3TLH4;S4R2J9;A0A0A0MQ79	Protein PRRC2C	Prrc2c
NaN	NaN	NaN	NaN	26.9647	25.4502	26.2344	26.678	+	4	4	4	31.2	31.2	31.2	25.926	0	34.033	802490000	11	P49722;Q8BKE0	P49722;Q8BKE0	Proteasome subunit alpha type-2	Psma2
NaN	NaN	NaN	NaN	26.0774	24.5056	24.7607	25.3661	+	3	3	3	16.4	16.4	16.4	22.906	0	14.957	280480000	4	Q9R1P3	Q9R1P3	Proteasome subunit beta type-2	Psmb2
NaN	NaN	NaN	NaN	25.3112	24.492	25.3277	25.4548	+	3	3	3	21.5	21.5	21.5	22.965	0	5.6452	312160000	4	Q9R1P1	Q9R1P1	Proteasome subunit beta type-3	Psmb3
NaN	NaN	NaN	NaN	24.7492	24.3028	24.4422	25.0427	+	4	4	4	16.7	16.7	16.7	38.751	0	6.7088	217450000	5	Q8K1K2;P62196	Q8K1K2;P62196	26S protease regulatory subunit 8	Psmc5
NaN	NaN	NaN	NaN	25.8147	24.0876	25.1548	25.3213	+	5	5	5	13.5	13.5	13.5	47.436	0	15.223	368090000	9	Q8BG32;G3UYI4;G3UYL3;G3UYL8;G3UX15;G3UZ28;G3UZ33;G3UWW7;G3UXL5;G3UYH2	Q8BG32;G3UYI4;G3UYL3	26S proteasome non-ATPase regulatory subunit 11	Psmd11
NaN	NaN	NaN	NaN	23.9374	23.1647	23.98	23.8816	+	2	2	2	3.8	3.8	3.8	60.718	0	4.7135	120310000	5	P14685	P14685	26S proteasome non-ATPase regulatory subunit 3	Psmd3
NaN	NaN	NaN	NaN	25.7736	24.7392	25.3407	25.4799	+	5	5	5	17.4	17.4	17.4	36.539	0	7.0237	361310000	5	P26516	P26516	26S proteasome non-ATPase regulatory subunit 7	Psmd7
NaN	NaN	NaN	NaN	25.8615	24.4736	25.4748	25.5179	+	4	4	4	20.8	20.8	20.8	27.101	0	10.167	357140000	7	G3X9K9;G3UXZ5;P97371;G3UXY0;G3UWN9	G3X9K9;G3UXZ5;P97371;G3UXY0;G3UWN9	Proteasome activator complex subunit 1	Psme1
NaN	NaN	NaN	NaN	26.7041	27.027	26.4499	26.1934	+	6	6	6	39.8	39.8	39.8	19.526	0	58.876	1512800000	13	Q8R2Y8	Q8R2Y8	Peptidyl-tRNA hydrolase 2, mitochondrial	Ptrh2
NaN	NaN	NaN	NaN	28.1225	27.8522	26.1995	26.9076	+	8	8	8	36.9	36.9	36.9	33.659	0	134.91	1849500000	17	Q922Q4;Q922W5;A2ABZ2	Q922Q4	Pyrroline-5-carboxylate reductase 2	Pycr2
NaN	NaN	NaN	NaN	26.5413	26.2888	26.4563	26.1583	+	9	9	9	18	18	18	85.054	0	145.54	800170000	13	D3Z158;Q8BML9;A0A140LIN2;A0A140LJH1;A0A140LIZ4;A0A140LJH2;A0A0A6YY08;A0A140LID3;A0A140LHJ3;A0A140LJK5;A0A140LIS6;A0A140LHZ5;A0A140LHC3;A0A140LII8;A0A140LIR0;F6TDS3;A0A140LHB3	D3Z158;Q8BML9		Qars
NaN	NaN	NaN	NaN	26.861	26.655	26.7385	26.2352	+	16	7	7	77.1	37.8	37.8	22.187	0	51.942	950490000	11	Q9D1G1;A0A494B945;A0A494BA38;A0A494BBL7	Q9D1G1;A0A494B945;A0A494BA38;A0A494BBL7	Ras-related protein Rab-1B	Rab1b
NaN	NaN	NaN	NaN	26.6005	26.0827	26.4504	26.6484	+	8	4	4	42.8	25.1	25.1	23.707	0	65.492	781920000	10	P61021	P61021	Ras-related protein Rab-5B	Rab5b
NaN	NaN	NaN	NaN	26.0568	25.3672	26.3621	26.4095	+	7	7	7	9.4	9.4	9.4	105.71	0	21.262	634360000	6	A0A2I3BPY7;Q9EP71	A0A2I3BPY7;Q9EP71	Ankycorbin	Rai14
NaN	NaN	NaN	NaN	29.1634	29.5698	29.2995	29.9973	+	7	7	7	57.1	57.1	57.1	16.761	0	323.31	7426900000	31	Q8BG13;O89086;S4R2M6	Q8BG13;O89086;S4R2M6	RNA-binding protein 3	Rbm3
NaN	NaN	NaN	NaN	27.6962	29.2278	28.8864	28.4945	+	5	5	5	52.2	52.2	52.2	10.275	0	28.804	4712700000	13	P61514;A0A1D5RL86	P61514;A0A1D5RL86	60S ribosomal protein L37a	Rpl37a
NaN	NaN	NaN	NaN	25.6648	27.3113	26.4154	25.966	+	10	10	10	28.9	28.9	28.9	55.249	0	62.04	1336700000	11	Q99LF4	Q99LF4	tRNA-splicing ligase RtcB homolog	Rtcb
NaN	NaN	NaN	NaN	24.4836	24.8169	24.6612	23.9335	+	3	3	3	7.3	7.3	7.3	80.376	0	26.553	251850000	6	Q8BIJ7	Q8BIJ7	RUN and FYVE domain-containing protein 1	Rufy1
NaN	NaN	NaN	NaN	25.3027	25.5563	25.6934	24.9917	+	7	7	7	14.5	14.5	14.5	70.092	0	11.449	437810000	8	Q8R4C2;D3Z4D2;Q8BR30;D6RET4;D3Z7T9	Q8R4C2;D3Z4D2;Q8BR30	RUN and FYVE domain-containing protein 2	Rufy2
NaN	NaN	NaN	NaN	23.9126	23.6474	24.1476	24.1653	+	3	3	3	8.1	8.1	8.1	50.213	0	4.6265	151340000	4	P60122;D3YW60	P60122;D3YW60	RuvB-like 1	Ruvbl1
NaN	NaN	NaN	NaN	27.4771	27.6606	27.8537	27.3035	+	11	11	11	21.7	21.7	21.7	69.372	0	91.556	2142000000	24	A0A5F8MPK9;Q9EP69;A0A1L1SR59	A0A5F8MPK9;Q9EP69	Phosphatidylinositide phosphatase SAC1	Sacm1l
NaN	NaN	NaN	NaN	25.664	25.7637	26.0487	25.8879	+	6	6	6	29.9	29.9	29.9	38.028	0	29.078	594330000	9	Q8K021;Q3TSA8;D3YTP4	Q8K021;Q3TSA8;D3YTP4	Secretory carrier-associated membrane protein 1	Scamp1
NaN	NaN	NaN	NaN	27.1963	27.3026	27.5248	26.9989	+	5	5	5	19.7	19.7	19.7	34.515	0	37.683	1520300000	10	E9Q855;Q3UXS0;O35609	E9Q855;Q3UXS0;O35609	Secretory carrier-associated membrane protein 3	Scamp3
NaN	NaN	NaN	NaN	28.4053	28.6162	28.6577	28.0829	+	10	10	10	57.2	57.2	57.2	24.74	0	81.138	3811200000	22	O08547;E9Q6R3;A0A0G2JF08;D6RES2	O08547;E9Q6R3	Vesicle-trafficking protein SEC22b	Sec22b
NaN	NaN	NaN	NaN	26.6768	26.1193	25.6388	25.2246	+	4	4	4	6.6	6.6	6.6	88.339	0	69.562	657240000	7	Q9Z2G6;J3QJX3;Q9Z2G6-2	Q9Z2G6;J3QJX3;Q9Z2G6-2	Protein sel-1 homolog 1	Sel1l
NaN	NaN	NaN	NaN	25.7287	25.0637	25.5139	26.0033	+	7	7	7	24.8	24.8	24.8	44.774	0	16.01	560510000	10	F8WIV2;Q60854;K7E6F1;E9Q108;E9Q0P9;E9PZQ9;E9Q4R2;E9PYY0;E9Q3Y1;E9Q6X2	F8WIV2;Q60854	Serpin B6	Serpinb6a;Serpinb6
NaN	NaN	NaN	NaN	25.6004	26.9347	26.6971	26.005	+	7	7	7	21.4	21.4	21.4	44.207	0	13.42	941270000	10	Q07235;A0A087WQ70;A0A087WQM1;A2RSF9	Q07235;A0A087WQ70	Glia-derived nexin	Serpine2
NaN	NaN	NaN	NaN	25.7892	26.1638	25.893	25.5814	+	5	5	5	15.5	15.5	15.5	44.303	0	6.7452	533710000	7	A0A0G2JEC4;Q9JK48;Q9JK48-2;Q9JK48-3;A2AWI9;A2AWI7;Q8R3V5-3;Q8R3V5-1;Q8R3V5	A0A0G2JEC4;Q9JK48;Q9JK48-2;Q9JK48-3	Endophilin-B1	Sh3glb1
NaN	NaN	NaN	NaN	27.0011	26.1179	26.3271	27.2007	+	4	4	4	14.3	14.3	14.3	55.986	0	21.004	865660000	7	P97797-2;P97797;P97797-4;P97797-3;A2ANC1;E0CX65	P97797-2;P97797;P97797-4;P97797-3	Tyrosine-protein phosphatase non-receptor type substrate 1	Sirpa
NaN	NaN	NaN	NaN	25.8095	25.4227	25.3519	25.2081	+	4	4	4	7.2	7.2	7.2	96.329	0	65.637	385660000	8	Q99MR3	Q99MR3	Solute carrier family 12 member 9	Slc12a9
NaN	NaN	NaN	NaN	25.065	25.5524	25.2468	25.0464	+	3	3	3	8.9	8.9	8.9	69.926	0	26.636	495730000	8	Q04519	Q04519	Sphingomyelin phosphodiesterase	Smpd1
NaN	NaN	NaN	NaN	27.7195	27.3472	27.3441	27.3078	+	7	7	7	25.2	25.2	25.2	49.857	0	69.225	1733900000	14	P70158	P70158	Acid sphingomyelinase-like phosphodiesterase 3a	Smpdl3a
NaN	NaN	NaN	NaN	26.5529	26.5342	26.467	25.6916	+	8	8	8	28.2	28.2	28.2	47.115	0	58.574	841250000	13	Q3U0I9;Q8CFD4;A0A0G2JEQ9;A0A0G2JDT3;A0A0G2JDJ6	Q3U0I9;Q8CFD4;A0A0G2JEQ9	Sorting nexin-8	Snx8
NaN	NaN	NaN	NaN	25.1961	24.7174	25.4168	25.3942	+	4	4	4	8.6	8.6	8.6	66.545	0	9.1645	470530000	8	Q91VH2	Q91VH2	Sorting nexin-9	Snx9
NaN	NaN	NaN	NaN	25.231	25.4278	25.3324	26.1171	+	4	4	4	10.3	10.3	10.3	63.079	0	10.834	546040000	7	D3Z3F8;Q8R1X6-2;Q8R1X6;D3Z1M5;D3Z2D6	D3Z3F8;Q8R1X6-2;Q8R1X6;D3Z1M5;D3Z2D6	Spartin	Spg20
NaN	NaN	NaN	NaN	24.8045	24.178	24.589	24.9569	+	3	3	3	16.4	16.4	16.4	23.357	0	6.4683	252220000	5	G3UXX3;Q91XH5;Q64105;G3UZ79	G3UXX3;Q91XH5;Q64105;G3UZ79	Sepiapterin reductase	Spr
NaN	NaN	NaN	NaN	25.2273	24.6044	25.2543	25.7082	+	4	4	4	6.5	6.5	6.5	98.278	0	8.5971	315070000	5	A0A087WNM1;Q91Z67;A0A087WSQ1;A0A087WNR5;A0A087WRV4;A0A087WS59;D3YZW1;Q91Z69	A0A087WNM1;Q91Z67;A0A087WSQ1	SLIT-ROBO Rho GTPase-activating protein 2	Srgap2
NaN	NaN	NaN	NaN	24.217	25.0768	24.747	24.3408	+	2	2	2	27.8	27.8	27.8	11.234	0	19.89	276770000	5	A2AUM6;P16254	A2AUM6;P16254	Signal recognition particle 14 kDa protein;Signal recognition particle 14 kDa protein, N-terminally processed	Srp14
NaN	NaN	NaN	NaN	25.6022	26.5205	25.6378	25.3883	+	8	8	8	22.6	22.6	22.6	55.72	0	32.431	697470000	8	P14576;E9PXC0;A0A1W2P809;A0A1Y7VJJ0;P14576-2	P14576;E9PXC0	Signal recognition particle 54 kDa protein	Srp54;Srp54c
NaN	NaN	NaN	NaN	25.3277	26.0433	25.6064	25.2196	+	8	8	8	18.8	18.8	18.8	74.656	0	54.854	571910000	10	F8VQC1;E9Q740	F8VQC1;E9Q740	Signal recognition particle subunit SRP72	Srp72
NaN	NaN	NaN	NaN	25.3525	26.6146	25.7852	25.4068	+	3	3	3	21.6	21.6	21.6	29.579	0	12.962	686120000	6	P47758	P47758	Signal recognition particle receptor subunit beta	Srprb
NaN	NaN	NaN	NaN	25.2901	24.1736	24.3507	24.1502	+	2	2	2	10.1	10.1	10.1	20.699	0	4.899	225210000	4	Q9DCF9-2;Q9DCF9	Q9DCF9-2;Q9DCF9	Translocon-associated protein subunit gamma	Ssr3
NaN	NaN	NaN	NaN	24.5179	25.0401	24.4847	24.1753	+	5	5	4	15.9	15.9	11.7	38.058	0	53.402	326900000	5	Q91Y74;A0A1L1SUM8;A0A1L1SRJ3;A0A1L1SUJ7	Q91Y74	CMP-N-acetylneuraminate-beta-galactosamide-alpha-2,3-sialyltransferase 4	St3gal4
NaN	NaN	NaN	NaN	24.6407	24.4418	25.2049	24.5009	+	3	3	3	11.8	11.8	11.8	46.259	0	6.6904	238360000	4	O88811-2;O88811	O88811-2;O88811	Signal transducing adapter molecule 2	Stam2
NaN	NaN	NaN	NaN	26.6082	24.8811	25.3372	26.0914	+	5	5	5	14	14	14	43.952	0	12.676	457990000	9	A2AD84;Q99JT2;D3Z359;Q9Z2W1;Q99KH8	A2AD84;Q99JT2;D3Z359;Q9Z2W1;Q99KH8	Serine/threonine-protein kinase 26;Serine/threonine-protein kinase 25;Serine/threonine-protein kinase 24;Serine/threonine-protein kinase 24 35 kDa subunit;Serine/threonine-protein kinase 24 12 kDa subunit	Stk26;Stk25;Stk24
NaN	NaN	NaN	NaN	23.6572	23.2379	23.6001	23.1232	+	2	2	2	10.5	10.5	10.5	29.315	0	7.0851	95820000	3	F7CJY7;F6X4N5;Q8BVI5;B7ZCB8	F7CJY7;F6X4N5;Q8BVI5;B7ZCB8	Syntaxin-16	Stx16
NaN	NaN	NaN	NaN	26.515	25.6693	26.2095	25.6138	+	3	3	3	21.6	21.6	21.6	26.925	0	45.78	571420000	11	O88983	O88983	Syntaxin-8	Stx8
NaN	NaN	NaN	NaN	24.2407	25.0312	24.5754	24.4434	+	4	4	4	11.3	11.3	11.3	68.995	0	7.8963	266370000	4	Q6A028	Q6A028	Switch-associated protein 70	Swap70
NaN	NaN	NaN	NaN	25.9939	25.3789	26.2721	27.206	+	9	9	9	14.8	14.8	14.8	117.51	0	38.336	779630000	14	E9Q3E2;Q8CC35-2;Q8CC35;Q8CC35-3	E9Q3E2;Q8CC35-2;Q8CC35;Q8CC35-3	Synaptopodin	Synpo
NaN	NaN	NaN	NaN	24.8311	24.0669	24.7603	25.031	+	2	2	2	2.6	2.6	2.6	116.05	0	4.3697	246080000	4	Q5F2E8;F6RXB5;A0A0R4J1T3;Q8BYC6	Q5F2E8;F6RXB5;A0A0R4J1T3;Q8BYC6	Serine/threonine-protein kinase TAO1;Serine/threonine-protein kinase TAO3	Taok1;Taok3
NaN	NaN	NaN	NaN	24.8349	25.5784	24.6914	24.5568	+	6	6	6	21.9	21.9	21.9	49.583	0	21.457	374430000	7	Q9R099	Q9R099	Transducin beta-like protein 2	Tbl2
NaN	NaN	NaN	NaN	23.5785	23.7336	24.6201	23.5523	+	2	2	2	3	3	3	92.798	0	3.1281	164880000	3	B1ATR2;Q6ZPJ0;A0A140LHL8	B1ATR2;Q6ZPJ0;A0A140LHL8	Testis-expressed sequence 2 protein	Tex2
NaN	NaN	NaN	NaN	26.3732	26.3813	25.4659	25.8001	+	3	3	3	41.1	41.1	41.1	10.458	0	20.186	829480000	7	P62075;A0A1W2P7H2;A0A1W2P756	P62075;A0A1W2P7H2	Mitochondrial import inner membrane translocase subunit Tim13	Timm13
NaN	NaN	NaN	NaN	25.3551	25.8296	24.8294	25.3924	+	5	5	5	12.6	12.6	12.6	51.091	0	13.099	470710000	5	O35857	O35857	Mitochondrial import inner membrane translocase subunit TIM44	Timm44
NaN	NaN	NaN	NaN	25.6558	25.4207	25.4294	25.2749	+	3	3	3	28.9	28.9	28.9	11.042	0	29.783	415160000	7	Q9WVA2;Q4FZG7	Q9WVA2;Q4FZG7	Mitochondrial import inner membrane translocase subunit Tim8 A;Putative mitochondrial import inner membrane translocase subunit Tim8 A-B	Timm8a1;Timm8a2
NaN	NaN	NaN	NaN	24.9455	25.1903	24.5928	24.7024	+	4	4	4	56.6	56.6	56.6	9.2864	0	17.406	360110000	6	P62077	P62077	Mitochondrial import inner membrane translocase subunit Tim8 B	Timm8b
NaN	NaN	NaN	NaN	24.044	23.7209	24.6146	24.4945	+	2	2	2	3.6	3.6	3.6	188.85	0	3.2511	170260000	2	B9EHJ3;P39447	B9EHJ3;P39447	Tight junction protein ZO-1	Tjp1
NaN	NaN	NaN	NaN	26.1602	26.0625	25.4681	24.9817	+	3	3	3	7.9	7.9	7.9	67.507	0	79.447	568600000	8	A0A498WGK6;Q9ET30	A0A498WGK6;Q9ET30	Transmembrane 9 superfamily member 3	Tm9sf3
NaN	NaN	NaN	NaN	23.7781	25.063	23.9232	23.6743	+	2	2	2	10.4	10.4	10.4	25.465	0	3.103	276980000	3	Q78IS1	Q78IS1	Transmembrane emp24 domain-containing protein 3	Tmed3
NaN	NaN	NaN	NaN	27.1661	27.493	27.1121	26.843	+	5	5	5	45.2	45.2	45.2	21.276	0	90.546	1597900000	9	E9Q7G1;D3YZZ5	E9Q7G1;D3YZZ5		Tmed7
NaN	NaN	NaN	NaN	27.6593	26.9093	27.6609	27.7203	+	2	2	2	63.6	63.6	63.6	5.0256	0	12.404	2103200000	8	Q6ZWY8;A0A0N4SVF0	Q6ZWY8;A0A0N4SVF0	Thymosin beta-10	Tmsb10
NaN	NaN	NaN	NaN	26.398	25.9276	26.418	26.0966	+	5	5	5	34.1	34.1	34.1	24.54	0	69.597	579220000	10	Q8C5G6;Q9QZ06;F7AT44;A9JEI5	Q8C5G6;Q9QZ06;F7AT44	Toll-interacting protein	Tollip
NaN	NaN	NaN	NaN	26.5793	26.4026	25.6254	25.9699	+	4	4	4	31.6	31.6	31.6	37.895	0	120.48	656790000	5	Q9QYA2	Q9QYA2	Mitochondrial import receptor subunit TOM40 homolog	Tomm40
NaN	NaN	NaN	NaN	24.008	25.4053	24.9634	24.1954	+	4	4	4	8.6	8.6	8.6	70.753	0	40.734	302640000	4	Q5SU71;Q61510;Q5SU72	Q5SU71;Q61510;Q5SU72	E3 ubiquitin/ISG15 ligase TRIM25	Trim25
NaN	NaN	NaN	NaN	25.7289	24.9911	25.3855	25.8139	+	19	2	0	62.2	9.4	0	49.953	0	5.7757	665200000	5	Q9CWF2	Q9CWF2	Tubulin beta-2B chain	Tubb2b
NaN	NaN	NaN	NaN	27.6462	26.203	26.4132	26.9166	+	13	4	4	45.2	19.7	19.7	50.09	0	41.194	876680000	6	Q922F4	Q922F4	Tubulin beta-6 chain	Tubb6
NaN	NaN	NaN	NaN	25.4453	27.2799	26.917	25.4986	+	11	11	11	20.1	20.1	20.1	107.24	0	70.812	1176200000	16	Q80X50-2;Q80X50-4;Q80X50;Q80X50-5;A0A0H2UH17;A0A0G2JDV6;Q80X50-3;A0A0G2JDT1;A0A0G2JGD0;A0A0G2JG47;A0A0G2JE24;A0A0G2JFN7	Q80X50-2;Q80X50-4;Q80X50;Q80X50-5;A0A0H2UH17;A0A0G2JDV6;Q80X50-3	Ubiquitin-associated protein 2-like	Ubap2l
NaN	NaN	NaN	NaN	25.6873	25.5963	25.7552	25.3609	+	3	3	3	9.9	9.9	9.9	56.459	0	77.704	421460000	3	A0A0R4J078;Q8VCH8	A0A0R4J078;Q8VCH8	UBX domain-containing protein 4	Ubxn4
NaN	NaN	NaN	NaN	24.6342	25.1054	25.1951	24.9628	+	3	3	3	19.2	19.2	19.2	19.481	0	5.4848	357360000	3	Q9CR09;M0QWS4	Q9CR09;M0QWS4	Ubiquitin-fold modifier-conjugating enzyme 1	Ufc1
NaN	NaN	NaN	NaN	26.284	26.4716	26.323	25.7959	+	8	8	8	13.9	13.9	13.9	89.519	0	35.113	719840000	11	Q8CCJ3;Q8CCJ3-1;Q8CCJ3-2	Q8CCJ3;Q8CCJ3-1	E3 UFM1-protein ligase 1	Ufl1
NaN	NaN	NaN	NaN	26.4515	26.741	26.6987	26.4403	+	3	3	3	72.9	72.9	72.9	9.1175	0	278.52	1023500000	8	P61961;H7BWZ1;D3YW97	P61961;H7BWZ1;D3YW97	Ubiquitin-fold modifier 1	Ufm1
NaN	NaN	NaN	NaN	25.7503	25.7925	25.6691	25.4268	+	8	8	8	24.5	24.5	24.5	52.515	0	17.048	688900000	8	Q99K23;A0A1B0GSM1;A0A1B0GQY6;A0A1B0GSY4;A0A1B0GRT2;A0A1B0GSK1	Q99K23;A0A1B0GSM1	Ufm1-specific protease 2	Ufsp2
NaN	NaN	NaN	NaN	26.4492	26.3369	26.0525	25.7082	+	11	8	8	8.2	6.4	6.4	172.76	0	48.146	672960000	9	E9Q4X2;G3UXP5;F6YNY8;F6X3X7	E9Q4X2		Uggt2
NaN	NaN	NaN	NaN	24.7707	25.7266	25.1752	25.0754	+	6	6	6	8.3	8.3	8.3	106.98	0	21.437	449060000	6	Q9Z1Z0;Q9Z1Z0-4;Q9Z1Z0-2;Q9Z1Z0-3	Q9Z1Z0;Q9Z1Z0-4;Q9Z1Z0-2	General vesicular transport factor p115	Uso1
NaN	NaN	NaN	NaN	24.8041	24.9797	25.2943	24.8974	+	4	4	4	12.8	12.8	12.8	51.483	0	10.152	364290000	5	A0A1D5RLY2;Q80WQ2;A0A1D5RLN5	A0A1D5RLY2;Q80WQ2;A0A1D5RLN5	Protein VAC14 homolog	Vac14
NaN	NaN	NaN	NaN	25.4418	25.8175	25.1003	25.5264	+	3	3	3	28.2	28.2	28.2	11.48	0	21.69	372330000	7	P63024;A0A0N4SUV3;B0QZN5;D3YTU0;P63044;Q62442-2;Q62442	P63024	Vesicle-associated membrane protein 3	Vamp3
NaN	NaN	NaN	NaN	23.1941	24.4343	23.6684	22.803	+	2	2	2	15	15	15	11.346	0	4.0279	154800000	2	A0A0A6YY66;Q8BSN6;O70480	A0A0A6YY66;Q8BSN6;O70480	Vesicle-associated membrane protein 4	Vamp4
NaN	NaN	NaN	NaN	26.295	26.2803	26.8436	26.2202	+	11	11	11	16.2	16.2	16.2	107.72	0	22.939	856630000	11	Q91W86;A0A1L1SRH3;A0A1L1SV27	Q91W86	Vacuolar protein sorting-associated protein 11 homolog	Vps11
NaN	NaN	NaN	NaN	26.5164	26.2768	26.4138	26.1273	+	10	10	10	17.2	17.2	17.2	94.825	0	70.775	790760000	14	G3X8X7;Q920Q4;Q920Q4-2;A2BI90	G3X8X7;Q920Q4;Q920Q4-2	Vacuolar protein sorting-associated protein 16 homolog	Vps16
NaN	NaN	NaN	NaN	25.2963	25.5205	25.4702	25.186	+	5	5	5	27.5	27.5	27.5	38.113	0	25.29	460990000	8	P40336;P40336-2;A0A1W2P7Z9;A0A1W2P7R7	P40336;P40336-2;A0A1W2P7Z9	Vacuolar protein sorting-associated protein 26A	Vps26a
NaN	NaN	NaN	NaN	25.2662	25.5707	25.2124	25.2192	+	5	5	5	11.7	11.7	11.7	67.554	0	41.956	387300000	5	Q9D2N9;A0A0G2JEL2	Q9D2N9	Vacuolar protein sorting-associated protein 33A	Vps33a
NaN	NaN	NaN	NaN	24.7624	24.4618	24.3648	24.2779	+	5	5	5	6.3	6.3	6.3	100.65	0	11.805	247430000	5	Q8R5L3-2;Q8R5L3	Q8R5L3-2;Q8R5L3	Vam6/Vps39-like protein	Vps39
NaN	NaN	NaN	NaN	25.1579	25.3837	25.583	25.5393	+	4	4	4	12.2	12.2	12.2	53.64	0	9.9786	415590000	7	P32921-2;P32921	P32921-2;P32921	Tryptophan--tRNA ligase, cytoplasmic;T1-TrpRS;T2-TrpRS	Wars
NaN	NaN	NaN	NaN	24.249	24.7931	24.7896	24.1948	+	6	6	6	14.5	14.5	14.5	51.658	0	34.481	251230000	7	Q8VDD8	Q8VDD8	WAS protein family homolog 1	Wash1
NaN	NaN	NaN	NaN	23.9121	23.858	23.8877	23.6032	+	2	2	2	2.9	2.9	2.9	135.97	0	20.359	133740000	3	G5E8J3;Q8K1X1;A0A0U1RQ34	G5E8J3;Q8K1X1;A0A0U1RQ34	WD repeat-containing protein 11	Wdr11
NaN	NaN	NaN	NaN	23.5914	23.1009	23.8502	24.0175	+	2	2	2	4.4	4.4	4.4	74.4	0	3.2207	122880000	2	Q8BH57-2;Q8BH57;Q8BH57-3	Q8BH57-2;Q8BH57;Q8BH57-3	WD repeat-containing protein 48	Wdr48
NaN	NaN	NaN	NaN	26.1835	27.8623	27.1895	26.4203	+	5	5	2	33.9	33.9	21.4	35.73	0	137.45	2108600000	7	P62960;A2BGG7;A0A0A0MQD2;B2RUF0;Q9Z2C8-2;Q9Z2C8	P62960	Nuclease-sensitive element-binding protein 1	Ybx1
NaN	NaN	NaN	NaN	25.3113	24.9121	25.3251	25.9665	+	8	4	4	19	9.6	9.6	60.629	0	7.5363	546490000	10	Q04736;D3YZ57;P39688-2;P39688;A0A0J9YUV2;E9Q696;P06240	Q04736	Tyrosine-protein kinase Yes	Yes1
NaN	NaN	NaN	NaN	24.9546	25.8121	25.3548	25.1459	+	8	8	8	15.7	15.7	15.7	112.53	0	87.246	504660000	6	D3Z5I1;Q3UPF5-2;Q3UPF5;G3X9X5	D3Z5I1;Q3UPF5-2;Q3UPF5;G3X9X5	Zinc finger CCCH-type antiviral protein 1	Zc3hav1
NaN	NaN	NaN	NaN	24.4632	25.5367	24.4527	24.324	+	3	3	3	54.4	54.4	54.4	12.846	0	17.896	344830000	5	A0A1W2P6J8;A0A1W2P6L7;A0A0F6AIX6;A0A1W2P7C8;A0A0F6AIX5;Q8BVA5-2;Q8BVA5;A0A1W2P818;A0A1W2P7T7;A0A1W2P820	A0A1W2P6J8;A0A1W2P6L7;A0A0F6AIX6;A0A1W2P7C8;A0A0F6AIX5;Q8BVA5-2;Q8BVA5	UPF0554 protein C2orf43 homolog
NaN	NaN	NaN	NaN	25.3393	26.5699	25.6268	25.3046	+	10	10	10	47.5	47.5	47.5	28.152	0	99.677	818820000	10	Q9CQE8	Q9CQE8	UPF0568 protein C14orf166 homolog
24.9037	NaN	25.3568	25.9262	24.8381	24.8838	25.8221	25.6794		4	4	4	30.2	30.2	30.2	24.196	0	11.443	680410000	9	A0A087WNP6;Q4VAA2-2;Q4VAA2;A0A087WRM0;F8WGL9;A0A087WS49	A0A087WNP6;Q4VAA2-2;Q4VAA2;A0A087WRM0	Protein CDV3	Cdv3
25.7159	25.4221	25.3696	25.5941	25.232	25.919	26.5922	25.678		12	12	12	17.4	17.4	17.4	95.295	0	27.973	840650000	13	A0A0A6YW80;G3X8Y3;Q80UM3;A0A0A6YXF4;A0A0A6YX86;Q9DBB4;E9PZ53	A0A0A6YW80;G3X8Y3;Q80UM3	N-alpha-acetyltransferase 15, NatA auxiliary subunit	Naa15
27.6865	NaN	28.2824	27.0493	28.3321	28.1892	29.256	29.3148		13	13	13	35.3	35.3	35.3	54.108	0	108.69	4925000000	29	A0A0A6YX18;Q8BVE3;A0A0A6YWP6;A0A0A6YVU0;A0A0A6YW86	A0A0A6YX18;Q8BVE3;A0A0A6YWP6	V-type proton ATPase subunit H	Atp6v1h
NaN	NaN	NaN	NaN	NaN	24.3147	24.6343	24.285		2	2	2	16.1	16.1	16.1	22.569	0	11.077	203660000	3	A0A0A6YXG0;Q9JKK1-2;Q9JKK1	A0A0A6YXG0;Q9JKK1-2;Q9JKK1	Syntaxin-6	Stx6
26.3077	28.1699	26.9804	28.9452	27.6998	26.3178	26.2904	29.0985		11	11	2	19.7	19.7	1.5	93.491	0	66.359	3029900000	29	A0A0A6YY47;E9Q589;P13595-2;P13595;A0A0A6YY91;P13595-3;A0A0A6YWU2;P13595-4	A0A0A6YY47;E9Q589;P13595-2;P13595;A0A0A6YY91;P13595-3;A0A0A6YWU2;P13595-4	Neural cell adhesion molecule 1	Ncam1
27.4664	29.2922	29.4906	27.8403	27.691	29.1385	28.9607	27.6724		8	8	2	47.6	47.6	15.9	9.2327	0	37.629	6902900000	37	A0A0G2JDW7;Q6ZWU9;A0A0G2JG29;A0A0G2JEX7	A0A0G2JDW7;Q6ZWU9;A0A0G2JG29	40S ribosomal protein S27	Rps27
NaN	NaN	NaN	NaN	25.8886	26.5922	NaN	25.8646		2	2	2	38	38	38	10.508	0	61.647	727510000	6	A0A494BAN1;A0A0G2JE32;A0A0G2JGL0;P62838;P61079;A0A494BA56;Q6ZWY6	A0A494BAN1;A0A0G2JE32;A0A0G2JGL0;P62838;P61079;A0A494BA56;Q6ZWY6	Ubiquitin-conjugating enzyme E2 D2;Ubiquitin-conjugating enzyme E2 D3;Ubiquitin-conjugating enzyme E2 D2B	Ube2d2;Ube2d3;Ube2d2b
NaN	NaN	NaN	NaN	24.493	25.1546	NaN	24.9447		4	4	4	32.8	32.8	32.8	20.008	0	10.049	279400000	3	D3YWR7;A0A0G2JGJ1;Q8BVI4;A0A0G2JGY0;D3Z1A1;D3Z099	D3YWR7;A0A0G2JGJ1;Q8BVI4;A0A0G2JGY0;D3Z1A1	Dihydropteridine reductase	Qdpr
28.2628	NaN	NaN	NaN	28.111	27.0115	28.1674	28.2886		7	7	2	51.9	51.9	15.3	20.586	0	21.658	2629300000	21	A0A0G2JGP4;Q9D091;P08556;A0A0G2JE25;A0A0G2JGM2;B2KGV5;E9Q8V2;E9PVD5;A0A0N4SVY1	A0A0G2JGP4;Q9D091;P08556;A0A0G2JE25	GTPase NRas	Nras
26.3004	NaN	25.9054	26.8983	27.0704	27.9505	28.3425	27.6738		12	12	7	37.3	37.3	23	55.293	0	115.48	2430700000	22	E9Q1V9;E9Q1W0;E9Q1T1;A0A0G2JGS4;Q6PHZ2-2;Q6PHZ2-4;Q6PHZ2;Q6PHZ2-5;Q8CCM0;E9PXV3;F6RWZ9;E9QAJ4;D6RDQ8;F8WIS9;P11798;F6WHR9	E9Q1V9;E9Q1W0;E9Q1T1;A0A0G2JGS4;Q6PHZ2-2;Q6PHZ2-4;Q6PHZ2;Q6PHZ2-5;Q8CCM0	Calcium/calmodulin-dependent protein kinase type II subunit delta	Camk2d
29.9413	30.1046	29.7101	28.8046	29.4646	29.8664	29.5198	29.1325		27	27	18	62.6	62.6	47.5	48.978	0	187.41	13620000000	74	A0A0J9YTY0;A0A0J9YUL3;Q8C1B7-3;Q8C1B7-2;Q8C1B7;A0A0J9YVA6;A0A0J9YUV6	A0A0J9YTY0;A0A0J9YUL3;Q8C1B7-3;Q8C1B7-2;Q8C1B7;A0A0J9YVA6	Septin-11	2022-09-11
NaN	29.2264	27.6773	29.1502	25.9968	27.4707	26.9796	27.1651		5	5	5	37.4	37.4	37.4	19.774	0	12.165	2999500000	13	A0A0J9YUD8;A0A0J9YUZ4;P63158;D3YZ18;D3YVC6	A0A0J9YUD8;A0A0J9YUZ4;P63158;D3YZ18	High mobility group protein B1	Hmgb1
25.8185	NaN	NaN	NaN	25.7883	25.4552	24.7213	NaN		2	2	2	13.3	13.3	13.3	28.654	0	5.4275	466010000	5	A0A0N4SUH8;Q9QZ23;D3Z285	A0A0N4SUH8;Q9QZ23;D3Z285	NFU1 iron-sulfur cluster scaffold homolog, mitochondrial	Nfu1
NaN	NaN	NaN	NaN	23.2515	24.1192	23.622	NaN		3	3	2	26.3	26.3	19.5	14.659	0	4.2866	135340000	4	A0A0N4SUX1;D3YY02;Q8CII5;G5E8L2;Q80ZW7;D3Z4H6;P52912;A0A0N4SVR8	A0A0N4SUX1;D3YY02;Q8CII5;G5E8L2;Q80ZW7;D3Z4H6;P52912;A0A0N4SVR8	Nucleolysin TIA-1	Tia1
25.419	26.7742	27.7003	25.5378	25.9482	29.7139	28.649	27.0268		13	13	13	37.3	37.3	37.3	39.644	0	173.66	5302200000	19	A0A0N4SV32;Q3UMP4;Q9CY58-3;Q9CY58-2;Q9CY58;A0A0N4SUQ1;A0A0N4SUN8;A0A0N4SWH2;Q9CY58-4;A0A0N4SVK5;A0A0N4SV40	A0A0N4SV32;Q3UMP4;Q9CY58-3;Q9CY58-2;Q9CY58;A0A0N4SUQ1;A0A0N4SUN8;A0A0N4SWH2;Q9CY58-4	Plasminogen activator inhibitor 1 RNA-binding protein	Serbp1
27.1106	NaN	27.8308	NaN	28.4804	28.6593	28.6018	29.3619		6	6	6	69.9	69.9	69.9	9.1815	0	44.149	5092700000	18	A0A0N4SW28;Q9DAS9;A0A0N4SVT3	A0A0N4SW28;Q9DAS9;A0A0N4SVT3	Guanine nucleotide-binding protein G(I)/G(S)/G(O) subunit gamma-12	Gng12
NaN	NaN	NaN	26.9943	26.1462	25.4507	25.9612	26.2735		4	4	4	34.8	34.8	34.8	18.556	0	7.7327	864780000	4	A0A0N4SWD0;Q9CZC8	A0A0N4SWD0;Q9CZC8	Secernin-1	Scrn1
NaN	NaN	NaN	NaN	23.9893	24.5901	23.4831	NaN		3	3	3	40.7	40.7	40.7	9.7331	0	39.6	167160000	4	A0A0N4SWI4;Q9CR98	A0A0N4SWI4;Q9CR98	Protein FAM136A	Fam136a
27.7416	26.8661	26.1297	26.4114	27.6481	27.0583	26.561	25.7508		9	9	9	37	37	37	42.121	0	97.541	1641600000	19	A0A0R3P9C8;Q9DC69	A0A0R3P9C8;Q9DC69	NADH dehydrogenase [ubiquinone] 1 alpha subcomplex subunit 9, mitochondrial	Ndufa9
25.7122	NaN	NaN	24.9017	26.2259	27.2541	26.0529	25.7248		6	6	6	39.7	39.7	39.7	23.991	0	65.778	1113500000	9	A0A0R4IZW9;Q9DCT5	A0A0R4IZW9;Q9DCT5	Stromal cell-derived factor 2	Sdf2
NaN	NaN	NaN	25.5993	25.2052	24.6067	NaN	25.2548		6	6	6	24.6	24.6	24.6	38.387	0	33.072	461770000	6	A0A0R4J005;A0A5F8MPJ3;E9QP62;Q9D7B2;Q99JW4;Q91XD2	A0A0R4J005;A0A5F8MPJ3;E9QP62;Q9D7B2;Q99JW4	LIM and senescent cell antigen-like-containing domain protein 1	Lims1
25.5374	26.2546	26.8032	27.06	26.1507	28.035	27.0828	27.4632		14	14	14	34.9	34.9	34.9	65.032	0	40.234	2320100000	19	A0A0R4J075;Q91V27;D3Z049	A0A0R4J075;Q91V27	Melanophilin	Mlph
30.772	28.6304	29.644	29.8346	29.9432	29.9902	29.0543	29.7372		25	25	25	55.3	55.3	55.3	47.896	0	323.31	14040000000	74	A0A0R4J083;P51174	A0A0R4J083;P51174	Long-chain specific acyl-CoA dehydrogenase, mitochondrial	Acadl
NaN	NaN	NaN	NaN	NaN	24.2855	24.921	24.2458		2	2	2	8.4	8.4	8.4	50.53	0	76.563	188720000	5	A0A0R4J0B5	A0A0R4J0B5
26.2846	26.7078	26.442	26.5156	26.1247	26.1381	26.3526	25.9625		8	8	8	9.1	9.1	9.1	93.314	0	25.725	1381600000	12	A0A0R4J0D3;Q3TDQ1	A0A0R4J0D3;Q3TDQ1	Dolichyl-diphosphooligosaccharide--protein glycosyltransferase subunit STT3B	Stt3b
28.6993	28.7367	27.7903	27.8522	27.9642	27.9821	26.9747	26.9702		20	20	20	45	45	45	73.417	0	260.71	3724800000	49	A0A0R4J0G0;Q8BH04;A0A2I3BQL9;A0A2I3BS39;A0A2I3BRX1;A0A2I3BQC6	A0A0R4J0G0;Q8BH04;A0A2I3BQL9;A0A2I3BS39;A0A2I3BRX1	Phosphoenolpyruvate carboxykinase [GTP], mitochondrial	Pck2
NaN	NaN	NaN	NaN	25.5173	25.6827	25.1339	NaN		6	6	6	6.9	6.9	6.9	132.77	0	27.48	460010000	7	A0A0R4J0H8;Q6NWW9;A0A0A6YX88	A0A0R4J0H8;Q6NWW9	Fibronectin type III domain-containing protein 3B	Fndc3b
28.2065	26.4701	25.8758	25.3585	27.9538	28.0167	27.0627	25.7183		21	21	21	6.3	6.3	6.3	504.77	0	102.81	2338200000	28	A0A0R4J0I9;Q91ZX7;Q3U5J2	A0A0R4J0I9;Q91ZX7	Prolow-density lipoprotein receptor-related protein 1;Low-density lipoprotein receptor-related protein 1 85 kDa subunit;Low-density lipoprotein receptor-related protein 1 515 kDa subunit;Low-density lipoprotein receptor-related protein 1 intracellular domain	Lrp1
25.9692	26.0612	25.9073	25.4559	26.6686	26.645	25.7612	24.886		5	5	5	41.4	41.4	41.4	17.731	0	64.868	1148800000	10	A0A0R4J0K1;Q9ERR7;A0A0G2JEF3;A0A1C7ZMY4	A0A0R4J0K1;Q9ERR7	15 kDa selenoprotein	2022-09-15
26.1504	26.1294	26.257	25.6795	25.6862	26.6244	26.7363	25.7292		15	15	15	8.9	8.9	8.9	218.71	0	29.737	1263400000	16	Z4YL78;A0A0R4J0K2;K3W4R5;A2AGT5-2;A2AGT5-3;A2AGT5	Z4YL78;A0A0R4J0K2;K3W4R5;A2AGT5-2;A2AGT5-3;A2AGT5	Cytoskeleton-associated protein 5	Ckap5
NaN	NaN	NaN	NaN	24.0934	23.7747	NaN	23.9205		3	3	3	7.5	7.5	7.5	45.075	0	4.5359	144320000	3	D3YTT4;A0A0R4J0P1;Q9D7B6;A0A1L1SUG2	D3YTT4;A0A0R4J0P1;Q9D7B6	Isobutyryl-CoA dehydrogenase, mitochondrial	Acad8
25.9083	NaN	NaN	26.17	26.5284	27.6431	27.4247	26.7262		6	6	6	44.6	44.6	44.6	11.435	0	18.371	1902000000	12	A0A0R4J0R1;O70404;A0A0U1RPE8	A0A0R4J0R1;O70404;A0A0U1RPE8	Vesicle-associated membrane protein 8	Vamp8
NaN	NaN	NaN	NaN	NaN	25.6963	24.8192	24.7807		6	6	4	17.2	17.2	12.9	52.178	0	39.396	435600000	6	A0A0R4J0T5;P28659-2;P28659-3;P28659;P28659-4;S4R2S7	A0A0R4J0T5;P28659-2;P28659-3;P28659;P28659-4	CUGBP Elav-like family member 1	Celf1
NaN	NaN	NaN	NaN	24.7786	23.648	NaN	24.4785		3	3	3	7.7	7.7	7.7	72.353	0	14.646	166080000	3	D3Z0V2;A0A0R4J0X8;Q9ES28-6;Q9ES28-8;Q9ES28-4;Q9ES28-5;Q9ES28-3;Q9ES28-2;Q9ES28-7;Q9ES28;A0A1B0GRS3	D3Z0V2;A0A0R4J0X8;Q9ES28-6;Q9ES28-8;Q9ES28-4;Q9ES28-5;Q9ES28-3;Q9ES28-2;Q9ES28-7;Q9ES28	Rho guanine nucleotide exchange factor 7	Arhgef7
32.3295	32.9934	31.9987	31.4527	32.107	32.3084	32.2561	31.2699		59	58	58	67.6	67.6	67.6	72.369	0	323.31	73199000000	264	A0A0R4J0Z1;P08003	A0A0R4J0Z1;P08003	Protein disulfide-isomerase A4	Pdia4
27.2693	26.2763	26.7107	26.8364	26.8751	25.0978	26.2781	26.2603		5	5	5	10.4	10.4	10.4	58.131	0	11.389	1132100000	13	G3UYZ1;A0A0R4J117;Q8R366;A0A0A6YWK7	G3UYZ1;A0A0R4J117;Q8R366	Immunoglobulin superfamily member 8	Igsf8
25.9928	26.794	26.0725	NaN	25.6843	25.1402	25.4936	25.5403		4	4	4	10.5	10.5	10.5	59.704	0	10.811	768080000	7	A0A0R4J138;P50429;P50429-2	A0A0R4J138;P50429;P50429-2	Arylsulfatase B	Arsb
NaN	NaN	NaN	NaN	23.1502	24.2862	NaN	23.1867		4	4	4	17.6	17.6	17.6	29.407	0	5.7397	128980000	4	G3UWZ6;A0A0R4J1B9;G3X9M0;Q9ER88-2;Q9ER88;G3UWR5;G3UWJ4;G3UZC0;G3UYM6;G3UWM7	G3UWZ6;A0A0R4J1B9;G3X9M0;Q9ER88-2;Q9ER88;G3UWR5;G3UWJ4;G3UZC0;G3UYM6;G3UWM7	28S ribosomal protein S29, mitochondrial	Dap3
NaN	NaN	NaN	NaN	25.612	25.3164	NaN	25.9818		4	4	4	10.9	10.9	10.9	72.544	0	9.0699	421760000	3	A0A0R4J1E3;Q9QXS6-3;Q9QXS6;Q9QXS6-2;F7CPL2	A0A0R4J1E3;Q9QXS6-3;Q9QXS6;Q9QXS6-2	Drebrin	Dbn1
NaN	NaN	NaN	NaN	24.1006	24.9297	NaN	24.3407		2	2	2	6.9	6.9	6.9	49.834	0	4.4552	215770000	2	A0A0R4J1F2;Q3U4P5;Q61144-2;Q61144;D3Z0X1	A0A0R4J1F2;Q3U4P5;Q61144-2;Q61144;D3Z0X1	Presenilin;Presenilin-2;Presenilin-2 NTF subunit;Presenilin-2 CTF subunit	Psen2
26.2903	24.65	27.8671	26.4023	29.5499	30.6983	30.7476	29.0765		16	16	1	61.9	61.9	8.2	28.728	0	323.31	12896000000	50	A0A0R4J1L2;Q91VK2;F6ZFU0;P57776-2;D3Z7N2;D3YY68;D3YZT9	A0A0R4J1L2;Q91VK2;F6ZFU0;P57776-2;D3Z7N2;D3YY68;D3YZT9	Elongation factor 1-delta	Eef1d
28.1461	30.5794	28.9814	27.9151	30.4535	30.1603	30.1263	28.6805		23	23	23	67.8	67.8	67.8	36.083	0	260.7	12818000000	62	A0A0R4J1Y7;E9PXX7;Q91W90	A0A0R4J1Y7;E9PXX7;Q91W90	Thioredoxin domain-containing protein 5	Txndc5
27.2713	28.3064	29.2838	27.6575	27.1968	29.2313	29.1877	27.479		24	24	24	44.2	44.2	44.2	62.543	0	194.92	6124400000	41	A0A0R4J259;Q7TMK9-2;Q7TMK9;G3UZI2;G3V018;G3UZ48;G3UXJ6;G3UWM1;Q8VHM5;G3XA76;F7B5B5;A2AW41;G3UXU5;S4R1E9	A0A0R4J259;Q7TMK9-2;Q7TMK9;G3UZI2;G3V018;G3UZ48;G3UXJ6	Heterogeneous nuclear ribonucleoprotein Q	Syncrip
NaN	NaN	NaN	25.0205	NaN	24.5045	24.9405	24.3871		1	1	1	8.1	8.1	8.1	31.737	0	3.9789	316650000	2	A0A0R4J263;O35083	A0A0R4J263;O35083	1-acyl-sn-glycerol-3-phosphate acyltransferase alpha	Agpat1
NaN	NaN	25.0279	24.4483	24.672	25.0112	24.2104	24.3858		5	5	5	45.6	45.6	45.6	17.633	0	12.721	374470000	5	A0A0R4J275;Q7TMF3;F6RBR6	A0A0R4J275;Q7TMF3	NADH dehydrogenase [ubiquinone] 1 alpha subcomplex subunit 12	Ndufa12
25.8994	28.0504	26.6867	25.4423	25.5744	26.06	25.8215	24.7517		12	12	12	8.4	8.4	8.4	213.74	0	69.124	1344400000	19	A0A0R4J2D3;Q8BI84;Q8BI84-2;Q8BI84-3;A0A0A6YX61	A0A0R4J2D3;Q8BI84;Q8BI84-2	Melanoma inhibitory activity protein 3	Mia3
27.2413	NaN	NaN	26.851	28.4304	26.8361	27.6414	27.9344		12	12	12	8.6	8.6	8.6	272.22	0	75.911	2104800000	22	A0A0U1RNJ1;P19096	A0A0U1RNJ1;P19096	Fatty acid synthase;[Acyl-carrier-protein] S-acetyltransferase;[Acyl-carrier-protein] S-malonyltransferase;3-oxoacyl-[acyl-carrier-protein] synthase;3-oxoacyl-[acyl-carrier-protein] reductase;3-hydroxyacyl-[acyl-carrier-protein] dehydratase;Enoyl-[acyl-carrier-protein] reductase;Oleoyl-[acyl-carrier-protein] hydrolase	Fasn
26.3299	26.2477	26.8424	26.7192	26.5948	26.2358	26.3478	26.6854		11	11	11	7.1	7.1	7.1	238.09	0	31.993	1320200000	18	A0A0U1RNK7;E9PX48;A2A9M5;A2A9M4;Q8R1A4-2;Q8R1A4;A0A0U1RNY4;A0A0U1RPH6;A2AW79;F6ZJ55;Q8C147	A0A0U1RNK7;E9PX48;A2A9M5;A2A9M4;Q8R1A4-2;Q8R1A4	Dedicator of cytokinesis protein 7	Dock7
NaN	25.6325	NaN	NaN	25.6486	27.5248	27.2153	26.2028		12	12	12	18.3	18.3	18.3	92.071	0	28.162	1434600000	15	E9Q5Q0;Q3TGG2;A0A0U1RPL0;Q7TQH0-3;Q7TQH0;Q7TQH0-2;J3QP59	E9Q5Q0;Q3TGG2;A0A0U1RPL0;Q7TQH0-3;Q7TQH0;Q7TQH0-2	Ataxin-2-like protein	Atxn2l
NaN	NaN	NaN	NaN	24.6657	24.9608	24.997	NaN		1	1	1	9	9	9	12.934	0.0020101	2.4528	286380000	3	A0A0U1RPY6;Q9JKW0	A0A0U1RPY6;Q9JKW0	ADP-ribosylation factor-like protein 6-interacting protein 1	Arl6ip1
26.4813	26.8522	27.0815	25.917	25.7361	26.7068	26.8193	25.9223		4	4	4	30.9	30.9	30.9	14.255	0	26.978	1541100000	16	A0A140LJG6;A0A140LHR3;A0A140LJ01;A0A140LHG8;Q9CYN2	A0A140LJG6;A0A140LHR3;A0A140LJ01;A0A140LHG8;Q9CYN2	Signal peptidase complex subunit 2	Spcs2
NaN	NaN	NaN	NaN	NaN	24.7694	24.2933	23.8059		3	3	3	3.6	3.6	3.6	98.13	0	4.3997	204820000	3	A0A140T8V9;Q8VDC1	A0A140T8V9;Q8VDC1	FYVE and coiled-coil domain-containing protein 1	Fyco1
27.1883	26.8399	27.7588	27.1859	26.9407	26.1263	27.3973	27.0046		13	13	13	45.5	45.5	45.5	53.926	0	44.101	1816500000	23	A0A1B0GSG5;Q91VI7;A0A1B0GRG4;A0A1B0GRY7	A0A1B0GSG5;Q91VI7;A0A1B0GRG4	Ribonuclease inhibitor	Rnh1
NaN	NaN	NaN	NaN	23.6794	23.7817	NaN	23.1183		3	3	3	10.8	10.8	10.8	39.774	0	5.0694	100040000	3	O88374;A0A1B0GX27;O35855;A0A1B0GST1;A0A1B0GQY4	O88374;A0A1B0GX27;O35855	Branched-chain-amino-acid aminotransferase;Branched-chain-amino-acid aminotransferase, mitochondrial	Bcat2
28.2632	28.1233	27.8014	28.2667	28.3399	27.353	28.1401	27.8672		18	18	17	37.8	37.8	35.8	70.642	0	53.548	3521700000	27	A0A1C7CYV0;Q99K51;B1AX58;Q3V0K9	A0A1C7CYV0;Q99K51;B1AX58	Plastin-3	Pls3
NaN	NaN	NaN	NaN	23.8939	23.5813	24.1988	NaN		3	3	3	4.4	4.4	4.4	117.93	0	5.4205	133200000	5	A0A1D5RM83;E9PUA3;Q8R0S2;Q8R0S2-2;A0A5F8MPT9	A0A1D5RM83;E9PUA3;Q8R0S2;Q8R0S2-2;A0A5F8MPT9	IQ motif and SEC7 domain-containing protein 1	Iqsec1
NaN	NaN	NaN	NaN	24.8139	23.8959	24.7669	NaN		3	2	2	10.3	6.7	6.7	45.24	0	3.6127	225990000	3	A0A1D5RMC1;Q6PDL0;A0A1D5RM94	A0A1D5RMC1;Q6PDL0;A0A1D5RM94	Cytoplasmic dynein 1 light intermediate chain 2	Dync1li2
28.0889	29.3583	29.9841	29.3532	27.5709	30.2709	30.2515	29.1165		13	13	13	65.6	65.6	65.6	10.309	0	44.13	12943000000	42	A0A1L1SQA8;P62852	A0A1L1SQA8;P62852	40S ribosomal protein S25	Rps25
26.8309	26.5223	26.1013	25.5922	26.161	26.093	25.124	24.8546		6	6	6	22	22	22	53.788	0	42.036	923550000	11	Q3UDS7;A0A1L1SSF2;Q8VDL4-3;Q8VDL4;Q8VDL4-2	Q3UDS7;A0A1L1SSF2;Q8VDL4-3;Q8VDL4;Q8VDL4-2	ADP-dependent glucokinase	Adpgk
25.7624	NaN	25.5535	25.942	25.5267	NaN	24.9157	25.425		2	2	2	12.4	12.4	12.4	31.334	0	7.5185	387290000	10	A0A1L1SSF8;Q91V76	A0A1L1SSF8;Q91V76	Ester hydrolase C11orf54 homolog
28.188	28.0035	27.2466	26.5401	27.9892	28.8068	27.455	26.8347		11	11	11	41.5	41.5	41.5	34.322	0	30.372	3731600000	28	Q5NCU4;A0A1L1SSH9;P07214;Q5NCU3	Q5NCU4;A0A1L1SSH9;P07214;Q5NCU3	SPARC	Sparc
27.586	28.082	26.1206	26.8053	28.1737	28.3572	26.4321	26.3635		13	13	13	40.1	40.1	40.1	41.52	0	55.897	3030300000	28	A0A1L1STE6;Q9D6R2;Q9D6R2-2	A0A1L1STE6;Q9D6R2;Q9D6R2-2	Isocitrate dehydrogenase [NAD] subunit alpha, mitochondrial	Idh3a
30.3002	27.3185	29.8757	29.8312	31.3787	29.8438	30.572	30.9271		16	16	16	69.7	69.7	69.7	17.005	0	323.31	19538000000	71	A0A1W2P6F6;A0A1W2P7Q9;Q60605-2;Q60605;A0A1W2P6G5;Q8CI43	A0A1W2P6F6;A0A1W2P7Q9;Q60605-2;Q60605;A0A1W2P6G5	Myosin light polypeptide 6	Myl6
28.5736	30.1272	29.5624	NaN	27.87	29.7318	29.1436	25.9653		9	9	2	40.3	40.3	19.9	20.246	0	115.23	9320500000	33	A0A1W2P768;P84228;F8WI35;E0CYR7;E0CYN1	A0A1W2P768;P84228;F8WI35	Histone H3.2;Histone H3	Hist1h3b;H3f3a
NaN	NaN	NaN	NaN	NaN	23.6775	24.4703	24.3715		2	2	2	4.3	4.3	4.3	45.112	0.0029571	2.2684	162250000	3	A0A1Y7VLJ5;A0A0R4J022;Q8BNQ3	A0A1Y7VLJ5;A0A0R4J022;Q8BNQ3	Integral membrane protein GPR137B	Gpr137b
NaN	NaN	NaN	NaN	24.1595	23.5302	25.2889	NaN		3	3	3	4	4	4	79.404	0	3.4741	175230000	3	A0A1Y7VM80;E9QLA5;Q0GNC1-3;Q0GNC1	A0A1Y7VM80;E9QLA5;Q0GNC1-3;Q0GNC1	Inverted formin-2	Inf2
NaN	NaN	NaN	NaN	24.2694	NaN	24.6054	24.4588		3	3	3	2.6	2.6	2.6	160.61	0	7.1076	228660000	3	F8VPK5;A0A1Y7VMN0;P70336;P70336-2;A0A1Y7VLD1;A0A3Q4L2X0;A0A3Q4EGR2;P70335-2;P70335	F8VPK5;A0A1Y7VMN0;P70336;P70336-2	Rho-associated protein kinase;Rho-associated protein kinase 2	Rock2
NaN	25.2307	NaN	25.6786	24.9429	24.3877	24.7304	25.6837		5	5	5	9.6	9.6	9.6	76.383	0	11.438	361340000	5	A0A286YCQ0;A0A286YDN0;E9Q6A3;E9PYX6;E9QNA7;D3Z5J3;A0A668KL65;A0A5F8MPJ2;A0A286YCI8;Q62417-5;Q62417-6;Q62417-4;Q62417-3;Q62417-2;Q62417-7;Q62417;A0A286YD34	A0A286YCQ0;A0A286YDN0;E9Q6A3;E9PYX6;E9QNA7;D3Z5J3;A0A668KL65;A0A5F8MPJ2;A0A286YCI8;Q62417-5;Q62417-6;Q62417-4;Q62417-3;Q62417-2;Q62417-7;Q62417	Sorbin and SH3 domain-containing protein 1	Sorbs1
NaN	NaN	NaN	NaN	NaN	25.0208	24.8334	24.9399		4	4	4	5	5	5	160.91	0	8.5991	295570000	5	A0A286YCX6;E9PY51	A0A286YCX6;E9PY51		Trappc8
NaN	NaN	NaN	NaN	25.5576	25.0947	25.5734	NaN		2	2	2	26.4	26.4	26.4	23.039	0	8.1383	333110000	3	A0A286YDF2;O89116;Q5FWJ7	A0A286YDF2;O89116;Q5FWJ7	Vesicle transport through interaction with t-SNAREs homolog 1A	Vti1a
29.2682	29.1792	28.2932	27.2168	28.9524	29.1785	28.3666	27.4427		42	42	42	25.6	25.6	25.6	233.32	0	177.4	6259400000	64	E9Q390;A0A286YDF5;Q69ZN7;Q69ZN7-4;A0A286YCZ3;Q69ZN7-2;Q69ZN7-3;A0A286YE65	E9Q390;A0A286YDF5;Q69ZN7;Q69ZN7-4;A0A286YCZ3	Myoferlin	Myof
25.4234	27.8852	25.9661	25.6718	26.4792	28.7094	27.8085	26.832		23	23	23	32	32	32	111.61	0	103.51	3191500000	38	A0A286YDI8;G3X972;A0A286YD08	A0A286YDI8;G3X972		Sec24c
24.8695	NaN	NaN	NaN	25.8013	25.3586	25.9319	25.8324		5	5	5	9	9	9	63.655	0	16.339	459050000	8	A0A286YED2;P53690	A0A286YED2;P53690	Matrix metalloproteinase-14	Mmp14
24.9063	26.5334	28.3314	26.5886	27.0743	28.1476	28.4847	27.9484		8	8	8	34	34	34	12.455	0	23.592	3684100000	23	A0A2I3BPG9;P83882;A0A0A6YW33	A0A2I3BPG9;P83882	60S ribosomal protein L36a	Rpl36a
27.8452	28.1861	27.6529	28.5423	27.863	28.3323	27.5797	29.1966		9	9	8	15.7	15.7	14.6	82.785	0	26.149	4469300000	28	A0A2I3BPT1;A0A2I3BQZ9;Q3TWF3;P12023-3;P12023;A0A2I3BR03;P12023-2	A0A2I3BPT1;A0A2I3BQZ9;Q3TWF3;P12023-3;P12023;A0A2I3BR03;P12023-2	Amyloid beta A4 protein;N-APP;Soluble APP-alpha;Soluble APP-beta;C99;Beta-amyloid protein 42;Beta-amyloid protein 40;C83;P3(42);P3(40);C80;Gamma-secretase C-terminal fragment 59;Gamma-secretase C-terminal fragment 57;Gamma-secretase C-terminal fragment 50;C31	App
26.169	NaN	NaN	25.515	26.4274	25.8345	26.3362	26.3424		4	4	4	40.4	40.4	40.4	22.577	0	15.04	855870000	11	A0A2I3BRD2;A0A2I3BPY8;A0A2I3BPX3;Q6P9J9	A0A2I3BRD2;A0A2I3BPY8;A0A2I3BPX3;Q6P9J9	Anoctamin-6	Ano6
NaN	NaN	NaN	23.8535	23.5497	22.5709	NaN	23.751		3	3	3	3.2	3.2	3.2	76.058	0	4.9456	118010000	3	A0A2I3BQ16;P62046	A0A2I3BQ16;P62046	Leucine-rich repeat and calponin homology domain-containing protein 1	Lrch1
26.2419	NaN	27.4287	26.1632	26.8908	28.4415	27.4962	26.8696		10	8	8	43.9	41.5	41.5	35.346	0	40.012	3279300000	18	A0A2R8VHP9;Q61990-2;Q61990;A0A2R8VI25;B2M1R7;A0A2R8VI12;Q3TT81;Q61990-3;A0A2R8VHN3;A0A2R8VJY1;A0A2R8W6L5;A0A2R8VHZ0;A0A2R8VI71;A0A2R8VHY9;A0A2R8VKN0;A0A2R8VI73;A0A2R8VHG2;A0A2R8VKF0;A0A2R8VI15;A0A2R8VHL8;A0A2R8VHI3;A0A2R8W6U6;E9Q7D8;P57722-2;P57722;A0A2R8VI92;A0A087WR61;A0A2R8W6H3	A0A2R8VHP9;Q61990-2;Q61990;A0A2R8VI25;B2M1R7;A0A2R8VI12;Q3TT81;Q61990-3;A0A2R8VHN3;A0A2R8VJY1;A0A2R8W6L5;A0A2R8VHZ0;A0A2R8VI71;A0A2R8VHY9;A0A2R8VKN0;A0A2R8VI73;A0A2R8VHG2;A0A2R8VKF0;A0A2R8VI15;A0A2R8VHL8	Poly(rC)-binding protein 2	Pcbp2
NaN	NaN	25.7742	NaN	26.5702	27.1866	26.3535	26.1363		5	5	5	34.4	34.4	34.4	18.783	0	11.838	1292300000	12	A0A338P7E3;A0A338P711;C0HKG6;C0HKG5	A0A338P7E3;A0A338P711;C0HKG6;C0HKG5
NaN	NaN	NaN	NaN	24.785	24.284	NaN	24.9343		3	3	3	35.7	35.7	35.7	15.637	0	9.3166	164840000	3	A0A338P7C0;O09061;A0A338P7F1	A0A338P7C0;O09061;A0A338P7F1	Proteasome subunit beta type-1	Psmb1
NaN	NaN	NaN	26.0015	26.436	25.4545	25.9452	26.4878		5	5	5	28.3	28.3	28.3	24.782	0	13.804	741640000	7	A0A338P7D7;Q9Z2U0;Q9CWH6;B7ZMS4;A0A3Q4L361;A0A3Q4EHS3;A0A3Q4EG42	A0A338P7D7;Q9Z2U0;Q9CWH6;B7ZMS4	Proteasome subunit alpha type-7;Proteasome subunit alpha type-7-like;Proteasome subunit alpha type	Psma7;Psma8
26.4188	NaN	26.2979	27.3431	25.6361	25.5394	25.8621	26.5161		5	5	5	5.6	5.6	5.6	131.1	0	41.454	911750000	13	A0A3B2WBH9;A0A3B2WCN9;Q9Z0U1;Q921G9;Q9QXY1	A0A3B2WBH9;A0A3B2WCN9;Q9Z0U1	Tight junction protein ZO-2	Tjp2
30.1055	30.0272	30.8826	28.8847	29.5743	30.7235	30.0922	29.7657		21	21	21	65.3	65.3	65.3	24.744	0	65.789	18857000000	71	A0A3B2WBL1;Q5XJF6;P53026;A0A3B2WDD2;A0A3B2W824;A0A3B2W820;D6RE43;A0A3B2WCA5	A0A3B2WBL1;Q5XJF6;P53026;A0A3B2WDD2;A0A3B2W824;A0A3B2W820	Ribosomal protein;60S ribosomal protein L10a	Rpl10a
NaN	NaN	25.6123	NaN	25.1285	25.3518	25.8083	25.0041		6	6	6	17.7	17.7	17.7	46.779	0	17.148	489130000	9	A0A494B9H1;Q9EPK6;A0A494B9B2	A0A494B9H1;Q9EPK6;A0A494B9B2	Nucleotide exchange factor SIL1	Sil1
NaN	NaN	NaN	NaN	23.1572	23.4651	NaN	22.9915		2	2	2	14	14	14	16.047	0	3.1837	126860000	2	A0A494B9H5;A0A494B9R3;Q9CQF0;A0A494B915	A0A494B9H5;A0A494B9R3;Q9CQF0;A0A494B915	39S ribosomal protein L11, mitochondrial	Mrpl11
NaN	NaN	NaN	NaN	25.2746	NaN	25.4233	26.005		6	6	4	10	10	8.7	78.317	0	7.0832	357140000	8	A0A494B9K4;Q9QYB5-2;Q9QYB5;A0A494BAX9;Q9QYB8-3;Q9QYB8;A0A494BBK1	A0A494B9K4;Q9QYB5-2;Q9QYB5	Gamma-adducin	Add3
25.5959	29.8417	28.4621	27.0122	26.1013	28.7341	28.6886	27.756		4	4	4	19	19	19	7.0062	0	12.224	4780000000	17	A0A494B9Z0;A0A494BBA8;Q642K5;P62862	A0A494B9Z0;A0A494BBA8;Q642K5;P62862	40S ribosomal protein S30	Fau
NaN	NaN	25.6681	25.9882	26.8072	26.8136	25.8755	25.8172		8	8	8	30.9	30.9	30.9	44.59	0	59.281	1039500000	13	Q91W09;A0A494BAI5;Q544X6;P22315;F6T2S0;A0A494BBL4;A0A494B9Y8;A0A494BAR8;A0A494BA61	Q91W09;A0A494BAI5;Q544X6;P22315;F6T2S0;A0A494BBL4;A0A494B9Y8	Ferrochelatase;Ferrochelatase, mitochondrial	Fech
NaN	NaN	NaN	NaN	26.3091	26.1855	26.1081	NaN		4	4	4	29.8	29.8	29.8	21.445	0	7.9618	696470000	4	F6SLP4;A0A494BAW5;A0A494BAK4;Q9DC16;A0A494BAX4	F6SLP4;A0A494BAW5;A0A494BAK4;Q9DC16;A0A494BAX4	Endoplasmic reticulum-Golgi intermediate compartment protein 1	Ergic1
26.7294	27.2534	26.8152	26.9771	26.4056	26.392	26.1431	25.8706		7	7	7	21.2	21.2	21.2	42.719	0	12.85	1416100000	13	A0A494BB11;Q8BXZ1;A0A494B9J5;A0A494B9P2	A0A494BB11;Q8BXZ1	Protein disulfide-isomerase TMX3	Tmx3
NaN	NaN	NaN	NaN	25.1525	24.0704	24.9384	NaN		3	3	3	2.8	2.8	2.8	127.65	0	5.1355	239010000	3	A0A571BDN7;P46935;A0A494BAE4;A0A494B9L5;E9PXB7;G3X9H8;A0A494BA39;A0A494B9F0;A0A494B953;A0A494BAG2;A0A494BAX0;Q8CFI0-2;Q8CFI0-3;Q8CFI0	A0A571BDN7;P46935;A0A494BAE4;A0A494B9L5;E9PXB7;G3X9H8;A0A494BA39;A0A494B9F0;A0A494B953;A0A494BAG2;A0A494BAX0;Q8CFI0-2;Q8CFI0-3;Q8CFI0	E3 ubiquitin-protein ligase NEDD4;E3 ubiquitin-protein ligase NEDD4-like	Nedd4;Nedd4l
25.995	NaN	25.1749	26.1497	24.792	24.2016	25.4793	26.0291		5	5	5	11	11	11	86.791	0	13.37	533000000	7	D3YU59;D3Z589;A0A5F8MPN3;D3YU22;A0A571BG24;Q3UH68-3;Q3UH68-2;Q3UH68;F6W1Y9	D3YU59;D3Z589;A0A5F8MPN3;D3YU22;A0A571BG24;Q3UH68-3;Q3UH68-2;Q3UH68	LIM and calponin homology domains-containing protein 1	Limch1
29.6136	28.7466	28.8655	29.9568	29.3742	28.3728	28.0399	29.3303		26	26	26	27.1	27.1	27.1	126.72	0	205.63	7365400000	69	A0A5F8MPB5;Q61739-2;Q61739;F6VSK8	A0A5F8MPB5;Q61739-2;Q61739;F6VSK8	Integrin alpha-6;Integrin alpha-6 heavy chain;Integrin alpha-6 light chain	Itga6
27.5552	28.2787	27.8881	28.6661	27.871	27.8501	28.035	28.6608		21	21	21	11.3	11.3	11.3	233.24	0	89.031	4200500000	52	A0A5F8MPX2;A0A5F8MPH5;Q99N50-11;Q99N50-5;Q99N50-4;Q99N50;Q99N50-3;A0A5F8MPI7;Q99N50-2;A0A140LJF2;Q99N50-8;Q99N50-6;Q99N50-7;A0A140LHC0	A0A5F8MPX2;A0A5F8MPH5;Q99N50-11;Q99N50-5;Q99N50-4;Q99N50;Q99N50-3;A0A5F8MPI7;Q99N50-2	Synaptotagmin-like protein 2	Sytl2
27.764	NaN	27.7164	27.5122	27.3497	26.8216	27.5345	27.8081		7	7	7	25.1	25.1	25.1	38.885	0	49.926	2212500000	21	A0A5F8MPN8;P14152;B1ATQ3	A0A5F8MPN8;P14152	Malate dehydrogenase, cytoplasmic	Mdh1
26.0748	25.8428	27.0031	26.6845	25.6803	25.3635	27.1923	26.2562		5	5	5	7.9	7.9	7.9	104.88	0	17.471	1042700000	12	A0A5F8MPP7;A2AAY5;O89032-3;O89032-2;O89032	A0A5F8MPP7;A2AAY5	SH3 and PX domain-containing protein 2B	Sh3pxd2b
NaN	NaN	NaN	NaN	26.3635	25.7562	26.3401	NaN		4	4	4	10.6	10.6	10.6	49.486	0	11.768	897220000	10	A0A5F8MPS7;P24638;B7ZCF5;B7ZCF4	A0A5F8MPS7;P24638;B7ZCF5;B7ZCF4	Lysosomal acid phosphatase	Acp2
NaN	NaN	NaN	NaN	25.5517	24.9474	NaN	25.992		4	4	4	14.4	14.4	14.4	61.629	0	6.4325	332880000	4	Q5UE59;E9Q7C9;Q7TNF4;Q8CD76;A0A5F8MPZ2;O88447;D3YXZ3;Q91YS4;O88448	Q5UE59;E9Q7C9;Q7TNF4;Q8CD76;A0A5F8MPZ2;O88447;D3YXZ3;Q91YS4;O88448	Kinesin light chain 1;Kinesin light chain 2	Klc1;Klc2
NaN	NaN	NaN	NaN	24.7039	24.0905	NaN	24.3055		2	2	2	16.2	16.2	16.2	21.092	0	7.5098	146990000	3	G3UXX9;G3XA66;Q8R5C0;A0A6I8MWZ8;P47802;G3UXB5;G3XA75;D3YVW0;D3Z3F4	G3UXX9;G3XA66;Q8R5C0;A0A6I8MWZ8;P47802;G3UXB5;G3XA75;D3YVW0;D3Z3F4	Metaxin-1	Mtx1
27.4717	NaN	26.8972	27.8252	27.0046	26.6126	27.3913	27.63		11	10	10	38.4	38.4	38.4	37.238	0	44.131	1750800000	14	A0A6I8MX27;P16125;D3Z7F0;A0A0N4SVV8	A0A6I8MX27;P16125;D3Z7F0	L-lactate dehydrogenase B chain;L-lactate dehydrogenase	Ldhb
31.171	31.4195	31.7954	32.4521	31.0486	31.1078	31.645	31.8165		53	53	53	65.2	65.2	65.2	368.47	0	323.31	44015000000	176	A0A7N9VR94	A0A7N9VR94
27.4079	28.2859	27.0618	27.5965	28.2835	30.1694	30.0419	29.2437		15	15	15	44.8	44.8	44.8	23.247	0	46.754	9729000000	29	A2A547;P84099	A2A547;P84099	Ribosomal protein L19;60S ribosomal protein L19	Rpl19
26.6675	26.8541	26.3021	26.7623	26.1396	25.3542	26.4051	26.5641		5	5	5	39.5	39.5	39.5	15.153	0	15.541	1177400000	9	A2A6G9;A2A6H0;Q61792;A2A6G6;A2A6G7;A2A6G8;A2A6H1;A2A6G5;E9Q0N6;A2A6G4;Q9DC07	A2A6G9;A2A6H0;Q61792;A2A6G6;A2A6G7;A2A6G8	LIM and SH3 domain protein 1	Lasp1
30.8885	30.865	30.9609	31.1155	30.4	30.7752	30.9085	30.6846		39	39	39	75.6	75.6	75.6	63.772	0	323.31	27171000000	140	A2A6U3;Q80UG5-3;Q80UG5;Q80UG5-2;A2A6U5;A8Y5D3	A2A6U3;Q80UG5-3;Q80UG5;Q80UG5-2	Septin-9	2022-09-09
25.6274	NaN	25.0002	NaN	27.4666	28.2214	26.2336	25.9186		17	17	17	24.2	24.2	24.2	89.909	0	95.71	1730300000	19	A2A7A7;Q8CFX1;A2A7A8	A2A7A7;Q8CFX1	GDH/6PGL endoplasmic bifunctional protein;Glucose 1-dehydrogenase;6-phosphogluconolactonase	H6pd
24.6654	NaN	25.1934	25.3539	NaN	NaN	NaN	NaN		3	3	3	44	44	44	8.7961	0	6.8134	392530000	7	A2A817;A2A816;A2A815;A2A813;Q99LX0	A2A817;A2A816;A2A815;A2A813;Q99LX0	Protein deglycase DJ-1	Park7
26.0526	NaN	25.4776	26.1312	25.2895	24.6957	25.2298	26.0968		9	4	4	16.9	10	10	75.148	0	30.053	558360000	10	A2A838;A2A841;P48193;A0A571BEG4;P48193-2;A2A839;A2A842;A2AD32;F7BUB8;A0A1D5RLV1;F7CR30;F6S4K9	A2A838;A2A841;P48193;A0A571BEG4;P48193-2;A2A839;A2A842;A2AD32	Protein 4.1	Epb4.1;Epb41
NaN	NaN	NaN	NaN	NaN	25.3411	25.8808	25.201		5	5	5	11.1	11.1	11.1	65.952	0	50.3	388650000	7	A2AAN2;Q8BMA6	A2AAN2;Q8BMA6	Signal recognition particle subunit SRP68	Srp68
28.3952	28.7071	28.293	29.6586	28.1518	27.2324	28.0845	28.9027		15	15	7	52	52	25	28.556	0	94.096	5217500000	48	A2AE89;P10649;F6WHQ7;A2AE91;Q8R5I6;D3YVP8;E9PV63;E9PVM7;P48774	A2AE89;P10649;F6WHQ7	Glutathione S-transferase Mu 1	Gstm1
27.3183	25.9587	26.204	28.9855	27.4982	26.4209	27.001	28.2961		13	13	13	12.7	12.7	12.7	139.82	0	140.32	2261700000	27	A2AFG7;A2AFG8;Q6PGJ3;P11627;B7ZCD3;F7A5H7	A2AFG7;A2AFG8;Q6PGJ3;P11627	Neural cell adhesion molecule L1	L1cam
26.217	25.4122	26.0805	26.0916	26.1235	24.67	25.8453	25.3201		6	6	6	18	18	18	44.669	0	43.23	606390000	12	A2AGN7;B7ZCF1;O88685;A0A087WPH7;F6Q2E3	A2AGN7;B7ZCF1;O88685;A0A087WPH7	26S protease regulatory subunit 6A	Psmc3
27.379	27.4199	28.3692	26.4638	28.6383	29.3497	28.357	27.8987		23	23	23	46.3	46.3	46.3	74.342	0	323.31	5278200000	51	A2AL50;Q8C0I1;H3BKN2;A2AL49;H3BIY5	A2AL50;Q8C0I1;H3BKN2;A2AL49	Alkyldihydroxyacetonephosphate synthase, peroxisomal	Agps
27.1823	26.5802	26.4541	25.691	26.9111	27.0056	26.1489	25.7655		12	12	12	23.1	23.1	23.1	75.127	0	32.611	1348100000	15	Q8CBM2;A2AL85;Q8BSY0	Q8CBM2;A2AL85;Q8BSY0	Aspartyl/asparaginyl beta-hydroxylase	Asph
25.823	NaN	25.9693	25.3679	25.8636	25.6986	25.7022	25.2573		5	5	5	25.6	25.6	25.6	40.02	0	29.403	786010000	6	A2AMC3;Q91ZW2;Q3UXG7;E9PZ15;E9Q686	A2AMC3;Q91ZW2;Q3UXG7	GDP-fucose protein O-fucosyltransferase 1	Pofut1
NaN	NaN	NaN	NaN	23.4946	NaN	23.6594	24.6237		2	2	2	5.1	5.1	5.1	59.117	0	4.9443	166590000	2	A2AMH3;A2AMH5;A2AMH4;Q6X893;Q6X893-2	A2AMH3;A2AMH5;A2AMH4;Q6X893;Q6X893-2	Choline transporter-like protein 1	Slc44a1
NaN	NaN	NaN	NaN	24.6375	26.3473	25.2812	NaN		6	6	6	11.1	11.1	11.1	117.83	0	16.107	497760000	7	A2AMY5;Q91VX2;A2AMY7;F6PYV5	A2AMY5;Q91VX2	Ubiquitin-associated protein 2	Ubap2
28.5315	NaN	29.0649	27.032	28.7165	28.1716	27.6951	30.1892		5	5	5	18.1	18.1	18.1	40.263	0	32.204	5078300000	23	Q3U8S1;A2APM5;A2APM3;A2APM4;E9QKM8;Q80X37;A2APM1;A2APM2;P15379-2;P15379-3;P15379-6;P15379-11;P15379-5;P15379-10;P15379-9;P15379-4;P15379-8;P15379-7;P15379;P15379-12;P15379-13	Q3U8S1;A2APM5;A2APM3;A2APM4;E9QKM8;Q80X37;A2APM1;A2APM2;P15379-2;P15379-3;P15379-6;P15379-11;P15379-5;P15379-10;P15379-9;P15379-4;P15379-8;P15379-7;P15379;P15379-12;P15379-13	CD44 antigen	Cd44
NaN	NaN	25.4832	NaN	25.9985	24.9217	25.515	26.3104		9	9	5	10.9	10.9	6.6	123.1	0	18.806	612820000	14	A2APV2;E9PXE6;F8VPR2;A2AQW2;A2APV2-2;A2APV2-3;A2AB60;A0A1W2P6X3;Q9JL26-2;Q9JL26	A2APV2;E9PXE6;F8VPR2;A2AQW2;A2APV2-2;A2APV2-3	Formin-like protein 2	Fmnl2
28.9571	27.4384	27.2583	28.0974	29.7973	29.121	27.9642	29.1849		31	31	31	53.2	53.2	53.2	82.829	0	272.6	6997500000	65	A2AQR0;Q64521	A2AQR0;Q64521	Glycerol-3-phosphate dehydrogenase;Glycerol-3-phosphate dehydrogenase, mitochondrial	Gpd2
26.1541	25.5666	26.4872	26.7407	25.8793	24.3808	25.8434	26.0672		3	3	3	3.4	3.4	3.4	129.51	0	69.542	808900000	8	A2AS98;P28660-2;P28660	A2AS98;P28660-2;P28660	Nck-associated protein 1	Nckap1
NaN	NaN	NaN	NaN	24.6971	25.2905	24.7167	NaN		3	3	3	28	28	28	17.619	0	23.869	299020000	4	F6VQ81;V9GWU5;Q3TUJ9;Q8BKP1;Q3TAI4;A2AUD5;Q9CYZ2	F6VQ81;V9GWU5;Q3TUJ9;Q8BKP1;Q3TAI4;A2AUD5;Q9CYZ2	Tumor protein D54	Tpd52l2
27.8544	NaN	NaN	NaN	28.2253	27.416	27.6751	27.8422		8	8	8	63.1	63.1	63.1	29.543	0	111.46	2428400000	22	A2AUR7;Q9D031;Q01730;B1AYQ0	A2AUR7;Q9D031;Q01730	Ras suppressor protein 1	Rsu1
29.3593	30.6008	29.563	28.6591	31.7913	32.0031	31.5995	30.6638		84	84	84	48.8	48.8	48.8	158.39	0	323.31	38058000000	200	A2AVJ7;Q99PL5;Q99PL5-10;Q99PL5-9;Q99PL5-8;Q99PL5-7;Q99PL5-6;Q99PL5-5;Q99PL5-4;Q99PL5-3;Q99PL5-2;Q99PL5-12;Q99PL5-11	A2AVJ7;Q99PL5	Ribosome-binding protein 1	Rrbp1
NaN	NaN	NaN	NaN	NaN	24.02	23.6375	23.6893		3	3	3	14.4	14.4	14.4	38.416	0	8.2048	149630000	3	A2RSX9;E9Q3G5;G5E8V9;E9QAY5	A2RSX9;E9Q3G5;G5E8V9		Arfip1
NaN	25.9551	NaN	NaN	23.8761	24.6447	25.091	23.8032		11	3	3	19.8	6	6	67.852	0	6.253	360890000	6	Q91YZ8;A3KFU5;A3KFU8;Q6PHQ9;V9GXG3	Q91YZ8;A3KFU5;A3KFU8;Q6PHQ9	Polyadenylate-binding protein	Pabpc4
29.1062	27.51	27.8034	29.624	30.932	30.3432	30.795	31.977		102	102	1	51.8	51.8	0.8	282.89	0	323.31	20234000000	210	A3KGU5;E9Q447;A3KGU7;A3KGU9;A3KGU4;A0A5F8MQC3;P08032	A3KGU5;E9Q447;A3KGU7;A3KGU9		Sptan1
26.917	26.059	26.1665	NaN	28.2396	29.0304	27.4189	26.2042		22	22	22	43.7	43.7	43.7	84.472	0	143.38	3351900000	36	A6PW84;Q3V1T4;A2A7Q5;Q3V1T4-3;Q3V1T4-2;F2Z499	A6PW84;Q3V1T4;A2A7Q5;Q3V1T4-3;Q3V1T4-2	Prolyl 3-hydroxylase 1	P3h1;Lepre1
NaN	NaN	NaN	NaN	NaN	23.9044	24.6471	24.9971		2	2	2	18.4	18.4	18.4	13.115	0.00052002	2.7717	210000000	3	B1AW94;B1AW93;B1AW91;A6PWR1;Q99JB8;B1AW95;B1AW92	B1AW94;B1AW93;B1AW91;A6PWR1;Q99JB8;B1AW95;B1AW92	Protein kinase C and casein kinase II substrate protein 3	Pacsin3
26.5769	26.8847	26.063	26.9903	26.985	26.614	26.7008	28.0994		15	15	15	15.1	15.1	15.1	206.82	0	179.04	1860600000	30	B0V2N1-6;B0V2N1-2;B0V2N1;B0V2N1-4;B0V2N1-3;B0V2N1-5;A0A286YDF6;Q5SPA9;G3UYU6;G3UX60;G3UWK6;E9Q7I7;E9PVW8;B9EJA3;G3UY75;Q64487-2;Q64487-12;Q64487-3;Q64487-1;Q64487-11;Q64487-9;Q64487-10;Q64487-7;Q64487-8;Q64487-5;Q64487-6;Q64487;A0A286YDS2;F6Y3V0;F6S1X8;A2A8L5	B0V2N1-6;B0V2N1-2;B0V2N1;B0V2N1-4;B0V2N1-3	Receptor-type tyrosine-protein phosphatase S	Ptprs
NaN	NaN	NaN	25.8867	25.606	25.6973	25.9064	26.1923		11	11	11	5.5	5.5	5.5	340.69	0	19.592	695320000	17	B0V2P5;Q8BPN8-2;Q8BPN8;F6RYL8;B0V2P6;Q8BPN8-3;F8WGX5;Q6PNC0	B0V2P5;Q8BPN8-2;Q8BPN8;F6RYL8	DmX-like protein 2	Dmxl2
25.4325	NaN	25.439	26.0949	24.9071	24.8386	24.8843	25.439		2	2	2	8	8	8	28.313	0	3.1798	457830000	6	B1AQD3;Q0PD20;Q64008	B1AQD3;Q0PD20;Q64008	Ras-related protein Rab-34	Rab34
NaN	NaN	NaN	NaN	26.6377	26.3228	25.8793	NaN		6	6	6	23	23	23	39.907	0	26.218	730690000	10	B1AQR8;G3X9T7;O08573-3;O08573-2;O08573	B1AQR8;G3X9T7;O08573-3;O08573-2;O08573	Galectin;Galectin-9	Lgals9
29.2465	28.7299	28.9568	28.9912	29.3401	29.0584	29.0785	28.8183		21	12	11	59.7	45.2	41.6	51.145	0	180.63	7869300000	48	B1AQY9;B1AQZ0;Q8CHH9;Q8CHH9-2;B7ZC46;E0CYM4;A0A1W2P866	B1AQY9;B1AQZ0;Q8CHH9;Q8CHH9-2;B7ZC46	Septin-8	2022-09-08
27.1087	NaN	26.3259	NaN	27.6134	26.9677	26.1729	26.1357		10	10	10	25.1	25.1	25.1	68.55	0	31.477	1420600000	19	B1AR28;P50544	B1AR28;P50544	Very long-chain specific acyl-CoA dehydrogenase, mitochondrial	Acadvl
26.0919	26.2787	25.9265	26.1159	26.0135	25.6009	24.8392	25.0782		5	5	5	39.6	39.6	39.6	10.909	0	14.913	746120000	11	B1ARW4;Q99LY9	B1ARW4;Q99LY9	NADH dehydrogenase [ubiquinone] iron-sulfur protein 5;NADH dehydrogenase [ubiquinone] iron-sulfur protein 5, N-terminally processed	Ndufs5
25.9056	27.6871	26.964	26.4949	26.2215	25.9292	25.6657	25.4448		7	7	7	17.5	17.5	17.5	54.33	0	36.877	1563800000	19	B1AV77;B1ATI0;P47740;A0A140LJF9;P47739	B1AV77;B1ATI0;P47740	Aldehyde dehydrogenase;Fatty aldehyde dehydrogenase	Aldh3a2
27.1578	NaN	27.0332	26.2663	28.0636	27.8138	26.4104	27.0884		17	17	17	36.3	36.3	36.3	66.113	0	125.89	2290200000	23	B1AU25;Q9Z0X1;Q9Z0X1-2	B1AU25;Q9Z0X1;Q9Z0X1-2	Apoptosis-inducing factor 1, mitochondrial	Aifm1
NaN	NaN	27.3831	25.841	26.6158	25.1027	26.168	26.0217		6	6	6	31.9	31.9	31.9	23.478	0	37.999	865810000	14	B1AWE0;Q6PFA2;B1AWE1;B1AWD8;B1AWD9;O08585	B1AWE0;Q6PFA2;B1AWE1;B1AWD8;B1AWD9;O08585	Clathrin light chain A	Clta
25.2712	NaN	24.5466	NaN	25.1119	26.3413	24.7292	24.3303		10	10	10	3.8	3.8	3.8	469.02	0	36.32	620510000	9	B1B0C7;E9PZ16;Q05793	B1B0C7;E9PZ16;Q05793	Basement membrane-specific heparan sulfate proteoglycan core protein;Endorepellin;LG3 peptide	Hspg2
26.7456	29.2796	28.4958	28.2508	27.1727	28.4608	28.2316	27.5158		17	17	17	42.3	42.3	42.3	48.562	0	114.77	4855200000	47	B2M1R6;P61979-3;P61979;P61979-2;H3BLL4;A0A286YDM3;H3BK96;H3BKD0;H3BKI8;A0A286YCM2;A0A286YEC4;H3BJS9;A0A286YDH1;Q8BT23;H3BLP7;H3BJ43;A0A286YE41	B2M1R6;P61979-3;P61979;P61979-2;H3BLL4;A0A286YDM3;H3BK96;H3BKD0;H3BKI8;A0A286YCM2	Heterogeneous nuclear ribonucleoprotein K	Hnrnpk
NaN	NaN	NaN	NaN	25.3116	25.513	25.2674	NaN		4	4	4	9.4	9.4	9.4	77.731	0	6.8451	382080000	6	B2RQS1;Q9ERG2	B2RQS1;Q9ERG2	Striatin-3	Strn3
NaN	NaN	23.684	NaN	25.0061	23.8611	24.6233	25.2525		4	4	3	3.5	3.5	2.6	140.13	0	8.6118	258840000	7	B2RXW8;B2RXQ2;S4R1D4;A0A087WPM2;B8QI36;F7CYX4;B8QI34;Q8BSS9;A0A087WPJ3	B2RXW8;B2RXQ2;S4R1D4;A0A087WPM2;B8QI36;F7CYX4;B8QI34;Q8BSS9	Liprin-alpha-2	Ppfia1;Ppfia4;Ppfia2
27.4593	27.5828	27.7894	27.9137	26.9055	26.2005	27.226	27.225		18	18	18	14.1	14.1	14.1	206.23	0	64.298	2208500000	33	B2RXS4	B2RXS4	Plexin-B2	Plxnb2
27.1017	27.6091	NaN	27.2533	26.8949	26.8593	26.4029	26.0342		22	14	14	30	24.8	24.8	114.56	0	89.229	1745400000	19	B2RXT3;E9Q7L0	B2RXT3;E9Q7L0		Ogdhl
30.4523	29.1847	30.5095	30.4841	30.1	29.7454	30.3199	30.2795		59	59	54	33.7	33.7	32.1	280.5	0	323.31	15967000000	138	B7FAU9;Q8BTM8;B7FAV1;F6XC15;Q8BTM8-2;J3JS91;F6Z2C0;F7AVL7	B7FAU9;Q8BTM8;B7FAV1	Filamin-A	Flna
NaN	NaN	26.9475	26.1178	26.5229	26.2801	27.3291	27.1242		8	8	7	20.6	20.6	18.3	43.174	0	60.224	1414300000	26	B7ZCU2;B7ZCU5;B7ZCU4;B7ZCU3;B7ZCU0;J3QNK8;Q8CBW3-5;Q8CBW3-2;Q8CBW3-4;Q8CBW3-3;Q8CBW3;A0A087WP64;A0A087WPE6;A0A087WNT3;A0A087WNU9	B7ZCU2;B7ZCU5;B7ZCU4;B7ZCU3;B7ZCU0;J3QNK8;Q8CBW3-5;Q8CBW3-2;Q8CBW3-4;Q8CBW3-3;Q8CBW3	Abl interactor 1	Abi1
26.6873	27.1943	28.5992	28.4084	27.0355	26.772	26.7038	27.3183		7	7	7	64.7	64.7	64.7	11.687	0	41.772	2438600000	17	D3YU60;E9QJW0;Q91VS7;A0A0N4SV17;D3YVR3	D3YU60;E9QJW0;Q91VS7	Microsomal glutathione S-transferase 1	Mgst1
26.9874	NaN	26.2311	NaN	28.2929	27.8782	26.3974	26.699		13	13	13	58.7	58.7	58.7	41.833	0	205.17	2065900000	21	D3Z1U9;D3YUM1;Q91YT0;D3Z0K1;D3YXX5;A0A494BAS8	D3Z1U9;D3YUM1;Q91YT0	NADH dehydrogenase [ubiquinone] flavoprotein 1, mitochondrial	Ndufv1
26.7188	26.6517	26.0954	26.4508	26.947	27.5455	26.2079	26.5028		10	10	10	57.5	57.5	57.5	26.385	0	30.855	1757700000	21	D3YX62;O70252;D3Z4A2;D3YXN4	D3YX62;O70252	Heme oxygenase 2	Hmox2
30.111	28.1947	30.6403	30.5122	30.8695	30.8471	31.4151	31.8635		24	24	24	70.5	70.5	70.5	35.256	0	243.25	28420000000	100	E9Q3B9;D3YYS6;O35678;Q3UFN1;O35678-2;A0A0N4SUZ2	E9Q3B9;D3YYS6;O35678;Q3UFN1	Monoglyceride lipase	Mgll
27.2088	26.7511	26.8582	28.1953	25.5864	26.4452	26.7927	27.269		3	3	3	4	4	4	93.856	0	28.271	1505700000	15	D3YYT0;P15116	D3YYT0;P15116	Cadherin-2	Cdh2
26.3357	26.0606	25.2734	26.0218	25.7077	25.5171	25.7033	25.4963		9	9	8	19.7	19.7	18.5	78.034	0	17.945	838550000	12	D3Z041;P41216;D3YVF6;D3Z457;F6WNZ2	D3Z041;P41216	Long-chain-fatty-acid--CoA ligase 1	Acsl1
26.2434	26.8614	NaN	27.6067	26.1894	25.9	26.1572	26.6937		6	6	6	49.4	49.4	49.4	17.603	0	37.651	1344400000	16	D3Z637;D3Z125;D3Z7X7;Q62393-2;Q62393;E9PUA7;F8WHQ1;Q62393-3;D3Z2U2	D3Z637;D3Z125;D3Z7X7;Q62393-2;Q62393;E9PUA7;F8WHQ1;Q62393-3;D3Z2U2	Tumor protein D52	Tpd52
25.7793	25.8396	25.2204	25.7191	NaN	NaN	25.2567	NaN		3	3	2	34.3	34.3	25.5	11.729	0	6.9611	354100000	7	D3Z1Z8;D3Z5N2;P54227	D3Z1Z8;D3Z5N2;P54227	Stathmin	Stmn1
NaN	NaN	25.8136	NaN	25.7206	25.8765	25.766	25.6694		8	8	8	21.4	21.4	21.4	37.965	0	10.896	659990000	8	D3Z3S1;Q9WUQ2;A0A0J9YU39;F6XLZ3	D3Z3S1;Q9WUQ2	Prolactin regulatory element-binding protein	Preb
25.0818	NaN	NaN	NaN	25.2912	24.7944	24.9481	25.2236		7	7	7	24.1	24.1	24.1	39.366	0	15.603	388710000	11	D3Z4B2;Q9CWZ7;A0A494BAE3;A0A494BA20;A0A494BAX2;A0A494BA49	D3Z4B2;Q9CWZ7;A0A494BAE3;A0A494BA20	Gamma-soluble NSF attachment protein	Napg
25.7709	26.0291	NaN	25.7637	25.8676	24.7737	24.4163	25.1893		4	4	4	31.9	31.9	31.9	14.038	0	13.596	620810000	7	D3Z568;Q9CQH3;F6Y6V5;D3YX99;D3Z6W9	D3Z568;Q9CQH3	NADH dehydrogenase [ubiquinone] 1 beta subcomplex subunit 5, mitochondrial	Ndufb5
27.5173	27.6198	27.1533	NaN	26.2802	27.5759	26.7725	26.7641		8	8	8	60.4	60.4	60.4	16.137	0	23.779	2206200000	22	D3Z645;Q9QZ88;D3YYD5;Q9QZ88-2;D3YW98	D3Z645;Q9QZ88;D3YYD5;Q9QZ88-2;D3YW98	Vacuolar protein sorting-associated protein 29	Vps29
NaN	NaN	NaN	NaN	23.921	24.339	24.1752	NaN		2	2	2	5.6	5.6	5.6	71.302	0	6.245	162920000	2	D3Z6S1;Q8BM55-3;Q8BM55-2;Q8BM55	D3Z6S1;Q8BM55-3;Q8BM55-2;Q8BM55	Transmembrane protein 214	Tmem214
NaN	25.3598	NaN	NaN	24.5815	24.4992	24.6417	24.3882		6	5	5	10.4	9.1	9.1	65.918	0	33.459	324020000	5	E9QAS9;E9QAT0;D3Z6U8;E9QNF5;Q6AXB7;E9QAS8;P35922-9;P35922-8;P35922-3;P35922-7;P35922-2;P35922;P35922-11;P35922-10;P35922-5;P35922-4;P35922-12;P35922-6	E9QAS9;E9QAT0;D3Z6U8;E9QNF5;Q6AXB7;E9QAS8;P35922-9;P35922-8;P35922-3;P35922-7;P35922-2;P35922;P35922-11;P35922-10;P35922-5;P35922-4;P35922-12;P35922-6	Fragile X mental retardation protein 1 homolog	Fmr1
25.1819	NaN	24.5725	NaN	26.902	26.8674	NaN	24.8819		13	13	2	33.5	33.5	5.6	65.994	0	45.497	853820000	15	D3Z7P3-2;F6RDM4	D3Z7P3-2	Glutaminase kidney isoform, mitochondrial	Gls
24.8611	25.3349	25.2423	NaN	24.7218	25.5748	24.9447	23.9754		6	6	6	14.1	14.1	14.1	50.103	0	21.162	505150000	6	F6UV57;F6YCM8;F8WIH0;D3Z7V3;H7BX64;Q3URD3-4;Q3URD3-3;Q3URD3-5;Q3URD3-2;Q3URD3	F6UV57;F6YCM8;F8WIH0;D3Z7V3;H7BX64;Q3URD3-4;Q3URD3-3;Q3URD3-5;Q3URD3-2;Q3URD3	Sarcolemmal membrane-associated protein	Slmap
28.8616	28.0563	28.9243	28.2483	28.5202	28.633	28.5751	27.5095		35	35	35	19.6	19.6	19.6	254.44	0	211.73	5441000000	65	G3X922;D4AFX7;A0A1L1STR9;A0A087WS25	G3X922;D4AFX7		Dnajc13
NaN	NaN	NaN	NaN	23.7314	23.3333	23.7311	NaN		2	2	2	2.1	2.1	2.1	119.59	0.0029528	2.2538	128930000	2	Q6NVF2;D6RH77;Q9Z280-2;Q9Z280;F6WKY8	Q6NVF2;D6RH77;Q9Z280-2;Q9Z280;F6WKY8	Phospholipase D1	Pld1
24.6839	NaN	24.8008	25.2046	25.5654	25.217	25.5802	25.7085		2	2	2	20.2	20.2	20.2	21.047	0	3.8288	479240000	6	G8JL35;E0CXA9;Q6PEB6;E0CYJ0	G8JL35;E0CXA9;Q6PEB6;E0CYJ0	MOB-like protein phocein	Mob4
25.6599	NaN	25.9961	26.0715	NaN	NaN	25.5223	25.0187		2	2	2	16.2	16.2	16.2	12.599	0	3.2365	482040000	4	E0CXB5;Q8R143;F6TFF2	E0CXB5;Q8R143;F6TFF2	Pituitary tumor-transforming gene 1 protein-interacting protein	Pttg1ip
25.7684	25.6936	25.9493	25.9356	25.1557	25.4917	25.3687	25.6892		7	7	4	21.3	21.3	16.2	29.331	0	20.573	831540000	10	F8WHW3;E0CYE6;Q3TWL2;E0CZF6;E0CZ18	F8WHW3;E0CYE6;Q3TWL2;E0CZF6;E0CZ18	Type 1 phosphatidylinositol 4,5-bisphosphate 4-phosphatase	Tmem55b
26.4249	28.0549	25.9583	27.0385	25.5888	26.8908	26.236	27.1321		4	4	4	33.8	33.8	33.8	8.7887	0	25.137	1687100000	20	E9PV44;O35143	E9PV44;O35143	ATPase inhibitor, mitochondrial	Atpif1
24.3602	26.1666	25.7032	25.8682	25.8784	28.1301	27.2152	26.5126		22	22	22	11	11	11	293.02	0	97.941	1933300000	34	E9PVA8	E9PVA8		Gcn1l1
25.2543	NaN	26.2321	25.2015	26.0901	28.0858	27.0138	26.2949		16	16	16	13.5	13.5	13.5	171.28	0	57.183	1882900000	21	E9PVC6;E9Q9E1;E9PVC5;Q6NZJ6;A0A0J9YUS5;Q6NZJ6-2;A0A0J9YVC1;A0A0J9YUC1;E9Q770;A2AMI7;Z4YKC4;A0A0R4J112;A2AMI2;A0A0N4SVL0;Q80XI3-2;Q80XI3-4;Q80XI3;Q80XI3-3;A0A0J9YU44;A0A0J9YUL1;A0A0J9YTV0;D3YWY7;D3YWM1;D3Z439	E9PVC6;E9Q9E1;E9PVC5;Q6NZJ6;A0A0J9YUS5;Q6NZJ6-2;A0A0J9YVC1;A0A0J9YUC1;E9Q770	Eukaryotic translation initiation factor 4 gamma 1	Eif4g1
25.3977	NaN	NaN	26.4516	24.5517	23.7712	24.5554	25.169		4	4	4	3.8	3.8	3.8	144.77	0	7.2891	393670000	6	E9Q175;E9Q3L1;E9PVU0;E9Q174;V9GXM4;V9GX76;Q64331	E9Q175;E9Q3L1;E9PVU0;E9Q174;V9GXM4;V9GX76;Q64331	Unconventional myosin-VI	Myo6
26.0727	25.3513	25.5674	26.1637	26.2066	27.0266	26.4741	26.1063		9	9	9	22.5	22.5	22.5	57.47	0	67.237	1311900000	19	E9PWY9;Q8C0C7;D6RIJ2	E9PWY9;Q8C0C7	Phenylalanine--tRNA ligase alpha subunit	Farsa
24.6267	26.2152	26.6557	25.5285	24.8349	27.9709	27.0624	25.2725		23	23	23	17.7	17.7	17.7	182.25	0	125.64	1688100000	26	E9PX59;Q69Z37	E9PX59;Q69Z37	Sterile alpha motif domain-containing protein 9-like	Samd9l
26.3667	NaN	NaN	NaN	26.6721	25.0534	24.9605	25.1507		5	5	5	16.9	16.9	16.9	42.826	0	14.446	608370000	11	E9PYH2;Q91V12;Q91V12-2;Q91V12-4;Q91V12-3	E9PYH2;Q91V12;Q91V12-2;Q91V12-4;Q91V12-3	Cytosolic acyl coenzyme A thioester hydrolase	Acot7
30.4548	30.6493	30.7016	30.6613	30.5223	30.2587	30.4863	30.2128		18	18	18	39.2	39.2	39.2	60.672	0	122.67	21754000000	69	E9PZ00;Q8BFQ1;K3W4L3;J3QPG5;Q61207	E9PZ00;Q8BFQ1;K3W4L3;J3QPG5;Q61207	Prosaposin	Psap
30.7421	29.9538	30.5305	30.8445	30.0767	29.1189	29.7743	29.973		19	19	9	86.5	86.5	34.5	30.2	0	117.32	14296000000	73	E9PZF0;Q01768;Q5NC80;Q5NC79	E9PZF0;Q01768;Q5NC80	Nucleoside diphosphate kinase;Nucleoside diphosphate kinase B	Gm20390;Nme2;Nme1
26.0888	NaN	NaN	NaN	25.7482	25.9434	25.7943	25.8058		5	5	5	27.8	27.8	27.8	33.589	0	27.59	763580000	6	E9Q137;E9Q137-2	E9Q137;E9Q137-2		Tex264
30.5257	30.6382	30.2908	30.4836	30.1999	30.7795	30.413	30.2978		30	29	28	61.8	61.8	61.8	50.648	0	323.31	24399000000	94	E9Q1G8;E9Q9F5;O55131	E9Q1G8;E9Q9F5;O55131	Septin-7	2022-09-07
25.7185	NaN	26.2537	NaN	26.7032	28.0416	26.5959	26.3223		14	14	13	29.1	29.1	27.7	82.955	0	313.14	1982800000	19	E9Q1S3;Q01405	E9Q1S3;Q01405	Protein transport protein Sec23A	Sec23a
NaN	NaN	NaN	NaN	NaN	24.7877	24.8468	25.3089		2	2	2	10.1	10.1	10.1	48.296	0	9.3301	273070000	3	E9Q3T7;E9Q242;P54822;A0A140LHU1	E9Q3T7;E9Q242;P54822;A0A140LHU1	Adenylosuccinate lyase	Adsl
NaN	NaN	26.5465	25.2158	26.0385	26.0737	26.0896	25.5845		8	8	8	17.1	17.1	17.1	75.359	0	33.388	849690000	15	Q3TAW3;E9Q296;Q8C178;Q9EPL9;D3Z2N6;A0A0J9YVH1	Q3TAW3;E9Q296;Q8C178;Q9EPL9	Acyl-coenzyme A oxidase;Peroxisomal acyl-coenzyme A oxidase 3	Acox3
27.3385	26.7647	27.0006	NaN	27.4597	27.0722	27.4604	27.1835		19	19	19	20.4	20.4	20.4	130.68	0	72.777	2207700000	33	E9Q3G7;P98197;F6Z4J2;D6RII8;A0A0G2JE89;E9QKK8;F6Q8D3;Q6DFW5;Q9QZW0-2;Q9QZW0	E9Q3G7;P98197;F6Z4J2	Phospholipid-transporting ATPase;Probable phospholipid-transporting ATPase IH	Atp11a
26.0638	NaN	26.8356	26.6642	26.7423	26.4546	27.1817	27.421		16	16	16	15.3	15.3	15.3	136.85	0	32.278	1535300000	26	E9Q586;E9Q3M3;O08788-2;O08788;D3YX34;D3Z2M9;D3YYG9	E9Q586;E9Q3M3;O08788-2;O08788;D3YX34	Dynactin subunit 1	Dctn1
30.4673	30.483	30.3013	29.919	29.2743	29.1822	29.0873	28.677		14	14	14	89.3	89.3	89.3	16.924	0	44.606	10399000000	49	G3UY29;E9Q3P9;F8WGS1;P62492;P46638;G3UZD3;G3UZL4;D3YYB3;Q9WTL2;E9PZB2;E9Q6B3;F6R2Z5	G3UY29;E9Q3P9;F8WGS1;P62492;P46638;G3UZD3;G3UZL4	Ras-related protein Rab-11A;Ras-related protein Rab-11B	Rab11b;Rab11a
26.2895	NaN	25.9118	25.8202	26.9862	26.2914	26.015	27.7184		10	10	10	26.1	26.1	26.1	61.9	0	23.27	1297000000	16	E9Q4G8;E9Q3Q6;Q61490;Q5MPX5;F6QH25	E9Q4G8;E9Q3Q6;Q61490;Q5MPX5	CD166 antigen	Alcam
NaN	NaN	NaN	24.9115	25.4153	24.3998	25.3432	25.6462		6	6	6	10.8	10.8	10.8	96.856	0	13.986	408390000	9	E9Q3X0;Q9EQK5;D3Z2N7	E9Q3X0;Q9EQK5	Major vault protein	Mvp
NaN	NaN	NaN	NaN	25.4519	25.3325	25.6007	NaN		5	5	5	19	19	19	46.217	0	139.14	436440000	6	E9Q4P1	E9Q4P1		Wdfy1
26.0466	NaN	NaN	NaN	25.9301	25.6074	25.4334	NaN		9	7	7	13.5	11.2	11.2	99.213	0	13.451	468980000	8	E9Q5B5;O08528;E9Q9M6	E9Q5B5;O08528	Hexokinase;Hexokinase-2	Hk2
NaN	26.7724	27.051	25.9498	24.9981	26.9886	26.3595	25.385		3	3	3	29	29	29	12.139	0	10.79	1202500000	12	E9Q5B6;F6ZV59;G5E8G0;G3X9W0;Q60668-4;Q60668-3;Q60668-2;Q60668;F6SHF3	E9Q5B6;F6ZV59;G5E8G0;G3X9W0;Q60668-4;Q60668-3;Q60668-2;Q60668	Heterogeneous nuclear ribonucleoprotein D0	Hnrnpd
33.3334	33.4677	33.7253	34.4594	32.7081	32.6974	32.9319	33.4915		240	240	240	79.7	79.7	79.7	604.25	0	323.31	145700000000	703	E9Q616;A0A494BBD5;G5E8K8;A0A494B8Y7	E9Q616		Ahnak
27.8731	27.3905	27.8487	28.7174	27.6688	27.134	28.0658	28.2484		28	28	28	12	12	12	392.7	0	110.07	3188500000	50	E9Q6R7;A0A1W2P7C0;Q61636;A0A1W2P8G5;A0A1W2P8A5;A0A1W2P6L4	E9Q6R7		Utrn
26.2419	NaN	26.079	NaN	26.2659	25.6127	25.5683	NaN		7	7	7	10.4	10.4	10.4	86.9	0	16.345	668570000	11	E9Q718;Q9R0B9	E9Q718;Q9R0B9	Procollagen-lysine,2-oxoglutarate 5-dioxygenase 2	Plod2
NaN	NaN	NaN	25.5111	25.6149	24.9959	NaN	25.6207		4	4	4	17.4	17.4	17.4	42.179	0	38.382	376020000	5	E9QNU1;E9Q7Q8;Q8R2G4-8;E9Q1U7;A0A0R4J1M9;A0A0R4J1Q4;A0A0R4J1N4;Q8R2G4-7;Q8R2G4;E9Q984;E9Q9Q8;E9Q8Z0;E9Q7Z7;F6RER8;E9Q630;F6W3A0	E9QNU1;E9Q7Q8;Q8R2G4-8;E9Q1U7;A0A0R4J1M9;A0A0R4J1Q4;A0A0R4J1N4;Q8R2G4-7;Q8R2G4;E9Q984;E9Q9Q8;E9Q8Z0;E9Q7Z7;F6RER8	Ecto-ADP-ribosyltransferase 3	Art3
26.2854	NaN	26.2419	26.9785	26.0781	25.478	25.4774	26.1017		8	8	8	6.3	6.3	6.3	204.52	0	19.609	784770000	15	E9Q852;E9Q9C3;Q9QZQ1-2;Q9QZQ1;E9PYX7;F7C3I9;A0A668KLE6	E9Q852;E9Q9C3;Q9QZQ1-2;Q9QZQ1;E9PYX7;F7C3I9	Afadin	Mllt4
28.017	26.2466	26.9485	28.9113	28.2349	28.5294	28.4932	29.3551		28	28	28	40.6	40.6	40.6	104.1	0	141.82	4837600000	59	G3X9V2;E9Q8Z5;E9Q8Z6;E9Q8Z8;P30999-2;P30999-3;P30999;E9Q8Z4;E9Q8Z9;D3Z2H2;E9Q903;E9Q901;E9Q904;E9Q986;D3Z7H6;E9Q906;E9Q907;E9Q905;D3Z2H7	G3X9V2;E9Q8Z5;E9Q8Z6;E9Q8Z8;P30999-2;P30999-3;P30999;E9Q8Z4;E9Q8Z9;D3Z2H2;E9Q903;E9Q901;E9Q904;E9Q986;D3Z7H6;E9Q906;E9Q907;E9Q905;D3Z2H7	Catenin delta-1	Ctnnd1
26.9379	26.8588	27.5275	NaN	26.687	27.6373	28.152	25.7312		12	12	12	29.6	29.6	29.6	60.452	0	36.441	2017700000	18	Q8VCQ8;E9QA16;E9Q0M9;S4R1T7;D3Z6I7;E9QA15;E9Q9F3;F6QLP8;F6RGN9;F6ZAW1;F6T2Z7	Q8VCQ8;E9QA16;E9Q0M9;S4R1T7;D3Z6I7;E9QA15		Cald1
NaN	NaN	NaN	24.8322	25.1172	25.4902	25.8357	24.9637		3	3	3	50	50	50	8.4825	0	8.0027	550800000	4	E9QA52;F6T7Y8;Q9WTK3;E9PW03	E9QA52;F6T7Y8;Q9WTK3;E9PW03	Glycosylphosphatidylinositol anchor attachment 1 protein	Gpaa1
NaN	NaN	24.3304	NaN	NaN	24.8427	24.2916	23.9432		4	4	4	7.2	7.2	7.2	72.474	0	8.5169	232480000	5	E9QAD4;Q7TQK5	E9QAD4;Q7TQK5	Coiled-coil domain-containing protein 93	Ccdc93
NaN	NaN	NaN	NaN	NaN	24.4414	24.1685	24.5515		2	2	2	4.6	4.6	4.6	47.989	0	4.9438	181200000	4	E9QAQ5;Q9WV60;D3Z7E5;Q2NL51	E9QAQ5;Q9WV60;D3Z7E5;Q2NL51	Glycogen synthase kinase-3 beta;Glycogen synthase kinase-3 alpha	Gsk3b;Gsk3a
NaN	NaN	NaN	NaN	24.8933	24.6431	NaN	26.0998		5	5	5	5.5	5.5	5.5	159.97	0	11.041	251110000	7	Q7TQG5;E9QK04;P97798-5;P97798-2;P97798-3;P97798-4;P97798;A0A1L1SRD6	Q7TQG5;E9QK04;P97798-5;P97798-2;P97798-3;P97798-4;P97798	Neogenin	Neo1
NaN	NaN	NaN	NaN	NaN	25.0513	24.8982	24.7128		5	5	5	5.8	5.8	5.8	136.46	0	46.634	285150000	5	E9QM77;O70305-2;O70305;F7B6X4;F6U2C2;O70305-3;F6V8M6;A0A286YDU2	E9QM77;O70305-2;O70305;F7B6X4;F6U2C2;O70305-3;F6V8M6	Ataxin-2	Atxn2
25.9757	NaN	26.2662	NaN	26.8582	28.3436	27.1672	25.5483		15	15	12	54.4	54.4	47.2	42.497	0	116.58	2227500000	18	E9QMH7;Q9DBZ1	E9QMH7;Q9DBZ1	Inhibitor of nuclear factor kappa-B kinase-interacting protein	Ikbip
25.9811	NaN	NaN	NaN	25.7056	25.742	25.4237	25.6486		8	8	8	9.1	9.1	9.1	129.7	0	19.688	679790000	9	G5E8R3;E9QPD7;Q05920;A0A494B951;A0A286YCC5;A0A494B912	G5E8R3;E9QPD7;Q05920	Pyruvate carboxylase;Pyruvate carboxylase, mitochondrial	Pcx;Pc
NaN	NaN	NaN	NaN	NaN	24.9735	25.2638	24.9651		3	3	3	3.6	3.6	3.6	127.14	0	27.994	334980000	3	F6TLV3;Q8BX90;E0CXY0	F6TLV3;Q8BX90	Fibronectin type-III domain-containing protein 3A	Fndc3a
24.6426	24.8021	24.4521	NaN	24.3539	24.3842	24.3944	NaN		4	4	4	11.8	11.8	11.8	41.032	0	9.6602	312890000	6	F6ZL86;Q61712;F6WEH1	F6ZL86;Q61712;F6WEH1	DnaJ homolog subfamily C member 1	Dnajc1
27.8043	NaN	26.4964	NaN	27.8765	27.3393	27.1833	26.6308		10	10	10	20	20	20	69.274	0	113.87	1696800000	16	F7A1B4;Q3UAM9;Q63961;F7BZW0	F7A1B4;Q3UAM9;Q63961	Endoglin	Eng
27.4666	30.3206	30.2725	29.6188	27.7142	31.0996	30.4203	29.3944		16	16	16	82.6	82.6	82.6	14.515	0	323.31	20617000000	56	Q6ZWZ6;F7AEH4;A0A1W2P7A1;P63323	Q6ZWZ6;F7AEH4;A0A1W2P7A1;P63323	40S ribosomal protein S12	Rps12
27.2624	26.1535	27.7246	27.5755	26.9757	26.0202	27.2268	26.9132		8	8	8	44.2	44.2	44.2	24.226	0	76.311	1491200000	19	F7ANV6;P97429;D3Z0S1;A0A0N4SW89;A0A0N4SV57;S4R1F2	F7ANV6;P97429;D3Z0S1;A0A0N4SW89;A0A0N4SV57	Annexin;Annexin A4	Anxa4
NaN	NaN	NaN	24.3759	24.2738	23.9211	NaN	23.9781		2	2	2	5.5	5.5	5.5	54.205	0	13.373	181320000	5	F7BX26;Q60676	F7BX26;Q60676	Serine/threonine-protein phosphatase;Serine/threonine-protein phosphatase 5	Ppp5c
30.7968	31.2915	30.9455	30.6219	32.0033	31.6792	31.4369	30.6598		39	39	39	70.7	70.7	70.7	48.132	0	323.31	41236000000	157	F7DBQ0;Q3TML0;Q922R8	F7DBQ0;Q3TML0;Q922R8	Protein disulfide-isomerase A6	Pdia6
28.177	26.1996	27.2616	27.9273	28.2263	27.1341	27.8454	28.8573		20	20	20	32.3	32.3	32.3	118.87	0	63.726	3147200000	39	F8VPU2;E9Q805	F8VPU2	FERM, RhoGEF and pleckstrin domain-containing protein 1	Farp1
30.1166	30.8957	30.4831	29.4309	30.6565	31.4126	30.9015	29.8115		83	83	0	61	61	0	152.54	0	323.31	28078000000	193	F8VQC7;A0A087WP14;A0A087WPX0	F8VQC7;A0A087WP14;A0A087WPX0		Ktn1
25.9323	25.1445	25.4658	NaN	26.0362	26.9943	25.2453	24.1813		11	11	11	11	11	11	177.19	0	80.761	898650000	12	F8VQJ3;P02468;F6TLW1	F8VQJ3;P02468	Laminin subunit gamma-1	Lamc1
NaN	NaN	24.3776	NaN	23.9183	NaN	23.4406	24.3209		2	2	2	1.4	1.4	1.4	172.47	0	3.1237	142430000	2	F8VQN6;Q8R4H2	F8VQN6;Q8R4H2	Rho guanine nucleotide exchange factor 12	Arhgef12
26.9497	26.073	27.1429	26.2278	27.7277	28.7858	29.0614	27.5589		25	25	25	26.2	26.2	26.2	139.41	0	110.79	3704500000	57	F8WHL2;Q8CIE6;F6XJN3	F8WHL2;Q8CIE6	Coatomer subunit alpha;Coatomer subunit alpha;Xenin;Proxenin	Copa
24.8812	27.7895	25.5896	25.3303	25.3692	27.4126	25.4062	25.6431		16	16	16	19.7	19.7	19.7	132.35	0	71.871	1624800000	23	F8WHM5;Q61543;F6RSH1;E9PWD8	F8WHM5;Q61543	Golgi apparatus protein 1	Glg1
25.4544	NaN	NaN	24.5606	26.6033	27.1016	26.4092	26.2503		3	3	3	31.6	31.6	31.6	9.0054	0	15.785	1240900000	9	F8WHP8;P56135	F8WHP8;P56135	ATP synthase subunit f, mitochondrial	Atp5j2
29.8487	28.3907	30.1563	29.9503	29.4719	28.5351	29.683	29.4755		32	32	32	57.7	57.7	57.7	75.288	0	136.02	9648900000	83	F8WIT2;P14824	F8WIT2;P14824	Annexin;Annexin A6	Anxa6
27.3785	27.5694	27.5593	27.9285	27.4722	27.6905	27.8456	28.3183		19	19	17	31.2	31.2	29.2	97.194	0	201.49	3288900000	38	Q3T9X3;F8WIV5;P39054-2;P39054;G3UZZ3;Q3TCR7;G3X9G4;G3UXX2;A0A0J9YUE9;A0A0J9YUN4;P39053-5;P39053-3;P39053-6;P39053-4;P39053;G3UY64	Q3T9X3;F8WIV5;P39054-2;P39054;G3UZZ3;Q3TCR7;G3X9G4	Dynamin-2	Dnm2
26.1546	NaN	25.8694	26.4718	26.8064	25.9693	26.4653	26.7824		5	5	5	15.5	15.5	15.5	40.538	0	22.329	1022600000	7	F8WJK8;Q99L47;E9Q1V0;E9Q1X9	F8WJK8;Q99L47;E9Q1V0	Hsc70-interacting protein	St13
29.7977	28.4688	28.8366	28.8863	31.0814	30.8517	30.2356	29.9706		23	23	23	77.7	77.7	77.7	30.446	0	323.31	18418000000	68	G3UX26;Q60930;A0A286YCR8;D3YZT5;D3YUN8	G3UX26;Q60930;A0A286YCR8;D3YZT5	Voltage-dependent anion-selective channel protein 2	Vdac2
26.7844	27.9769	27.4998	26.09	26.2162	27.9209	27.0374	26.7479		17	17	17	19.8	19.8	19.8	141.41	0	85.829	2414600000	26	G3UY93;Q9Z1Q9;G3UZ22;G3UYW2	G3UY93;Q9Z1Q9	Valine--tRNA ligase	Vars
NaN	NaN	NaN	NaN	NaN	27.8935	27.9966	26.8722		6	6	6	6.7	6.7	6.7	148.58	0	16.304	1817000000	8	G3UYG6;Q6Y7W8;G3UWR2;E9Q2M5;G3UYR9;Q6Y7W8-2;G3UZX7	G3UYG6;Q6Y7W8;G3UWR2;E9Q2M5;G3UYR9;Q6Y7W8-2	PERQ amino acid-rich with GYF domain-containing protein 2	Gigyf2
NaN	NaN	NaN	26.0258	25.9457	28.6337	28.3126	27.3889		7	7	7	82.1	82.1	82.1	6.3442	0	90.362	3005000000	17	G3UYV7;P62858	G3UYV7;P62858	40S ribosomal protein S28	Rps28
27.3253	25.655	27.6892	25.8991	27.2821	26.5655	27.4111	25.5589		7	7	7	21.3	21.3	21.3	42.78	0	18.366	1578400000	14	G3UZP7;P01899;P01897;Q8HWB2;P01896;P01895-2;P01895;P01900;P14427	G3UZP7;P01899;P01897	H-2 class I histocompatibility antigen, D-B alpha chain;H-2 class I histocompatibility antigen, L-D alpha chain	H2-D1;H2-L
NaN	27.937	NaN	27.5571	27.049	27.9979	28.1756	27.5135		9	9	9	34.9	34.9	34.9	21.447	0	19.135	2857100000	19	G3X8R0;A0A494BBE3;Q60870	G3X8R0;A0A494BBE3	Receptor expression-enhancing protein	Reep5
31.0708	31.4811	30.4651	30.595	30.2886	30.2847	30.0707	29.9146		17	17	17	31.9	31.9	31.9	55.726	0	209.18	23529000000	96	G3X8T3;P16675;A2A5J8;A2A5J9	G3X8T3;P16675	Carboxypeptidase;Lysosomal protective protein;Lysosomal protective protein 32 kDa chain;Lysosomal protective protein 20 kDa chain	Ctsa
25.5729	26.0243	26.5841	25.5792	25.5692	26.9365	26.6133	25.5634		15	15	15	21.7	21.7	21.7	102.1	0	53.695	1236000000	15	G3XA17;Q62448;F7CBP1;Q62448-2;F6TW20;F7DAB1;F6UU81	G3XA17;Q62448;F7CBP1;Q62448-2	Eukaryotic translation initiation factor 4 gamma 2	Eif4g2
27.0577	25.5464	27.1935	27.8064	26.9566	26.1418	26.8736	27.5019		14	14	11	17.2	17.2	14.2	134.75	0	39.855	1763300000	24	G5E829;Q3UHH0;F8WHB1;Q9R0K7;Q8C048;S4R1C4;A2ALL9;Q0VF55;A0A1W2P7C7;A0A1W2P867;A0A1W2P7R3;A0A1W2P772	G5E829	Plasma membrane calcium-transporting ATPase 1	Atp2b1
26.6162	26.6098	NaN	NaN	26.6231	26.5575	25.0772	25.2866		6	6	6	15.1	15.1	15.1	57.685	0	11.245	954770000	8	G5E897;A0A1L1SRB2	G5E897		Kdelc2
26.6071	27.2754	26.7713	NaN	26.7798	26.4367	26.1836	26.0525		7	7	7	11.2	11.2	11.2	104.21	0	37.463	1306300000	10	G5E8C4;Q8BRH0;A0A0R4J173;Q8BRH0-2	G5E8C4;Q8BRH0	Transmembrane and TPR repeat-containing protein 3	Tmtc3
30.4138	29.7556	30.0337	31.0701	29.5025	28.6125	29.2369	30.2693		30	20	7	86.7	68.1	21	28.556	0	53.944	12648000000	72	G5E8R1;G5E8R0;E9Q455;G5E8R2;E9Q453;E9Q456;B7ZNL3;F8WID5;E9Q448;S4R261	G5E8R1;G5E8R0;E9Q455;G5E8R2;E9Q453;E9Q456;B7ZNL3;F8WID5;E9Q448		Tpm1
26.6421	NaN	NaN	NaN	26.1748	25.4619	26.2693	26.1819		4	4	4	22.6	22.6	22.6	24.293	0	7.9021	720800000	12	H3BIX4;Z4YLB7;P97300-3;P97300-1;P97300;A0A0A0MQN8;H3BKA7;P97300-4	H3BIX4;Z4YLB7;P97300-3;P97300-1;P97300;A0A0A0MQN8	Neuroplastin	Nptn
25.1004	25.8785	NaN	25.7675	26.1386	27.0629	26.3146	26.2807		11	11	11	17.4	17.4	17.4	108.59	0	68.61	1119600000	18	H3BJU7;H3BJ45;H3BJ40;H3BKH9;H3BJX8;Q60875-5;Q60875-4;Q60875;Q60875-3;Q60875-2;H3BL15;H3BLF9;H3BJ59	H3BJU7;H3BJ45;H3BJ40;H3BKH9;H3BJX8;Q60875-5;Q60875-4;Q60875;Q60875-3;Q60875-2	Rho guanine nucleotide exchange factor 2	Arhgef2
24.9715	NaN	NaN	NaN	26.3631	26.1271	NaN	25.9877		2	2	2	22.3	22.3	22.3	15.951	0	14.19	603160000	5	H3BK59;H9H9R4;Q9JHJ3	H3BK59;H9H9R4;Q9JHJ3	Glycosylated lysosomal membrane protein	Glmp
NaN	NaN	27.3721	NaN	27.1001	25.8978	27.1578	27.0511		6	6	6	35.9	35.9	35.9	32.829	0	52.967	1285300000	17	H3BKH6;Q9R0P3;H3BJP2;H3BLJ9;H3BJL6;H3BK43;H3BL99;H3BJC6	H3BKH6;Q9R0P3;H3BJP2;H3BLJ9;H3BJL6;H3BK43	S-formylglutathione hydrolase	Esd
26.9411	27.0573	27.1269	27.0165	26.2421	25.7187	26.5641	26.3062		4	4	4	24.4	24.4	24.4	21.602	0	10.6	1135300000	17	J3QP71;K3W4Q8;P18572-2;P18572	J3QP71;K3W4Q8;P18572-2;P18572	Basigin	Bsg
NaN	NaN	NaN	NaN	NaN	26.2576	27.1407	27.8704		6	2	2	3	0.8	0.8	228.56	0	4.9378	1207800000	7	K3W4R2;Q6URW6-2;Q6URW6;Q6URW6-3;A0A140LI60	K3W4R2;Q6URW6-2;Q6URW6;Q6URW6-3;A0A140LI60	Myosin-14	Myh14
29.004	28.9231	29.4567	29.3772	28.8756	29.1774	29.1898	28.6316		31	31	31	34.4	34.4	34.4	96.426	0	310.33	8865700000	93	K3W4T3;Q9Z1G4-3;Q9Z1G4-2;Q9Z1G4;A2A599	K3W4T3;Q9Z1G4-3;Q9Z1G4-2;Q9Z1G4	V-type proton ATPase subunit a;V-type proton ATPase 116 kDa subunit a isoform 1	Atp6v0a1
NaN	NaN	NaN	NaN	25.3674	25.9825	24.9888	NaN		10	10	10	9.2	9.2	9.2	216.65	0	50.129	500120000	9	M0QWP1;Z4YK85;A2ASQ1-3;A2ASQ1-2;A2ASQ1;Z4YJS5	M0QWP1;Z4YK85;A2ASQ1-3;A2ASQ1-2;A2ASQ1	Agrin;Agrin N-terminal 110 kDa subunit;Agrin C-terminal 110 kDa subunit;Agrin C-terminal 90 kDa fragment;Agrin C-terminal 22 kDa fragment	Agrn
29.5926	28.5677	29.4161	30.6232	28.9191	28.0501	28.81	29.8347		29	29	26	65.7	65.7	61.9	62.277	0	178.9	9258600000	70	O08553;Q71H75;Q3TMU8;O35098	O08553	Dihydropyrimidinase-related protein 2	Dpysl2
NaN	NaN	NaN	NaN	24.5033	24.62	NaN	25.1704		3	3	3	7.6	7.6	7.6	67.568	0	9.2528	244870000	5	O08599;O08599-2;A0A140LHJ4	O08599;O08599-2	Syntaxin-binding protein 1	Stxbp1
NaN	NaN	NaN	NaN	25.6471	24.4292	NaN	25.5118		3	3	3	21.9	21.9	21.9	24.826	0	7.2568	261100000	4	Q6GT24;O08709;D3Z0Y2;A0A0A6YXQ7	Q6GT24;O08709;D3Z0Y2	Peroxiredoxin-6	Prdx6
28.028	29.1825	27.0999	27.2561	28.7013	28.9609	27.8455	27.9765		15	15	15	45.8	45.8	45.8	54.272	0	323.31	5118000000	37	O08749	O08749	Dihydrolipoyl dehydrogenase, mitochondrial	Dld
30.0504	30.4011	29.7861	29.1265	29.4928	30.0462	30.4723	29.3158		23	23	23	48.9	48.9	48.9	58.792	0	241.02	14739000000	61	O08795;O08795-2;A0A1L1ST83	O08795;O08795-2	Glucosidase 2 subunit beta	Prkcsh
30.2455	28.8108	29.5201	28.9957	30.968	31.1274	30.505	30.2249		23	22	22	80.3	80.3	80.3	31.052	0	226.83	21693000000	75	O08807;B1AZS9	O08807;B1AZS9	Peroxiredoxin-4	Prdx4
26.1837	NaN	26.6039	NaN	27.1419	26.407	26.5007	26.9953		9	9	9	29.7	29.7	29.7	47.513	0	45.738	1236200000	17	O08917;G3UYU4;G3UZZ5;G3UWW8;G3XA73	O08917;G3UYU4	Flotillin-1	Flot1
28.7991	28.32	28.4566	28.2934	27.7646	27.8152	26.8811	28.0542		12	12	12	41.9	41.9	41.9	32.251	0	155.27	4159900000	23	Q3TMX0;O08992;H3BLG5;A2AKJ9;A2AKJ6;A2AKJ5	Q3TMX0;O08992;H3BLG5	Syntenin-1	Sdcbp
27.3697	27.5101	27.0686	26.1767	26.5926	25.9944	26.151	26.006		2	2	2	10.5	10.5	10.5	38.241	0	35.792	1435000000	10	O09005	O09005	Sphingolipid delta(4)-desaturase DES1	Degs1
26.236	NaN	26.3848	26.3326	26.8482	26.0093	26.8926	27.2966		6	6	6	38.5	38.5	38.5	24.55	0	60.843	1222500000	11	Q9D3L3;O09044;B0R029;E9Q8A1;B0R030	Q9D3L3;O09044;B0R029;E9Q8A1;B0R030	Synaptosomal-associated protein;Synaptosomal-associated protein 23	Snap23
27.2946	28.0574	28.0163	28.4232	26.9594	27.3189	28.2053	28.0383		8	8	8	51.9	51.9	51.9	21.066	0	44.083	3571500000	22	O09114;O09114-2	O09114;O09114-2	Prostaglandin-H2 D-isomerase	Ptgds
27.4147	27.0885	26.8972	26.5623	27.0443	27.2062	26.9525	26.7703		11	11	11	15.3	15.3	15.3	114.65	0	104.73	1832600000	20	O09159	O09159	Lysosomal alpha-mannosidase	Man2b1
NaN	NaN	NaN	26.3011	25.8948	25.5334	25.607	25.8116		7	7	7	26.2	26.2	26.2	41.704	0	11.999	728660000	9	O09174	O09174	Alpha-methylacyl-CoA racemase	Amacr
28.3424	27.9622	28.4781	28.0554	27.9444	27.0983	27.1397	26.7301		8	8	8	21.1	21.1	21.1	54.043	0	88.981	2834800000	34	O35114	O35114	Lysosome membrane protein 2	Scarb2
29.7794	29.352	28.5949	29.0649	30.5082	29.9874	28.6124	29.5202		25	25	25	75.9	75.9	75.9	33.296	0	323.31	11769000000	72	O35129;F6QPR1;F6Q8V7	O35129	Prohibitin-2	Phb2
NaN	NaN	NaN	NaN	24.0886	24.1487	NaN	24.1809		4	4	4	6.5	6.5	6.5	79.97	0	16.603	209210000	5	Q497W9;O35286;A0A0G2JG10;A0A0G2JGQ5	Q497W9;O35286;A0A0G2JG10;A0A0G2JGQ5	Pre-mRNA-splicing factor ATP-dependent RNA helicase DHX15	Dhx15
NaN	NaN	26.9579	NaN	25.7188	26.5331	26.6532	25.7482		9	6	6	30.6	24.1	24.1	33.901	0	103.02	1294500000	8	O35295	O35295	Transcriptional activator protein Pur-beta	Purb
27.9191	27.7398	28.2294	28.3167	27.199	27.6172	27.3681	27.4075		7	7	7	15.2	15.2	15.2	54.388	0	26.499	2579300000	17	O35405	O35405	Phospholipase D3	Pld3
NaN	NaN	NaN	NaN	24.9945	25.1926	NaN	25.4523		3	3	3	14.7	14.7	14.7	36.118	0	13.011	382250000	4	O35459;F7B227	O35459;F7B227	Delta(3,5)-Delta(2,4)-dienoyl-CoA isomerase, mitochondrial	Ech1
NaN	NaN	NaN	NaN	24.7794	23.7009	NaN	24.3449		2	2	2	15.2	15.2	15.2	34.577	0	39.227	253490000	6	O35593	O35593	26S proteasome non-ATPase regulatory subunit 14	Psmd14
27.1746	27.1157	27.2965	28.2906	27.3392	26.9022	27.5176	27.0399		6	6	6	4.9	4.9	4.9	142.88	0	21.445	2434800000	22	O35604	O35604	Niemann-Pick C1 protein	Npc1
26.5742	NaN	26.5797	NaN	27.4347	26.6938	27.1709	28.0769		3	3	3	12.2	12.2	12.2	35.284	0	11.92	1794000000	9	O35682;A0A0N4SW94	O35682;A0A0N4SW94	Myeloid-associated differentiation marker	Myadm
NaN	26.5129	26.4637	NaN	25.804	26.2868	26.365	26.1033		8	8	8	20.5	20.5	20.5	52.534	0	37.445	1068600000	11	O35704	O35704	Serine palmitoyltransferase 1	Sptlc1
31.5721	32.5543	31.7464	31.1263	31.0644	31.4068	31.1328	30.711		30	30	6	76.5	76.5	14	37.063	0	323.31	42242000000	142	O35887;G3UWV3;G3UWR0;G3V004;G3UY49;G3UXA8;G3UXA3	O35887;G3UWV3;G3UWR0;G3V004	Calumenin	Calu
30.2364	28.792	30.1016	29.3617	30.593	30.2893	30.5769	29.8875		17	17	17	46.7	46.7	46.7	49.027	0	323.31	16969000000	75	O54734	O54734	Dolichyl-diphosphooligosaccharide--protein glycosyltransferase 48 kDa subunit	Ddost
28.5161	27.9545	27.9786	27.9062	28.3313	29.2151	28.3728	28.7433		20	20	20	23.2	23.2	23.2	115.61	0	168.92	5881100000	58	O54782;F6TMZ3;F6Z025	O54782	Epididymis-specific alpha-mannosidase	Man2b2
28.9648	27.8997	29.071	29.7051	29.2159	28.2432	28.8274	29.3807		14	14	14	22	22	22	87.269	0	129.01	6588000000	47	O54931-3;O54931-2;O54931;A2API8;F7AA26;O54931-5;O54931-4;A0A5F8MPZ6;A2APJ1;A2API9	O54931-3;O54931-2;O54931;A2API8;F7AA26;O54931-5;O54931-4	A-kinase anchor protein 2	Akap2;Pakap
27.075	26.8072	28.771	26.0907	28.1905	28.1595	29.2541	27.4736		9	9	9	78.7	78.7	78.7	10.102	0	60.531	4006900000	22	O54962	O54962	Barrier-to-autointegration factor;Barrier-to-autointegration factor, N-terminally processed	Banf1
NaN	NaN	26.4162	NaN	26.8257	26.6623	27.1767	26.5849		4	4	4	28.3	28.3	28.3	27.465	0	27.301	1230300000	11	Q8C4F9;Q8CB78;O54965-2;O54965;A0A0G2JEM4;A0A0G2JGT7;A0A0G2JDP6	Q8C4F9;Q8CB78;O54965-2;O54965;A0A0G2JEM4;A0A0G2JGT7	E3 ubiquitin-protein ligase RNF13	Rnf13
24.9814	NaN	NaN	NaN	25.2857	23.7765	25.1258	25.0485		2	2	2	9.5	9.5	9.5	38.822	0	7.1811	286020000	4	O54984;A0A1B0GRE1	O54984;A0A1B0GRE1	ATPase Asna1	Asna1
28.1263	29.1908	29.4366	29.3345	28.2307	28.6269	28.2545	27.918		10	10	9	52.8	52.8	48.2	21.694	0	270.14	6338200000	35	O55022	O55022	Membrane-associated progesterone receptor component 1	Pgrmc1
26.7738	26.2053	26.6866	NaN	27.6566	27.9208	27.9602	27.418		20	20	20	33.1	33.1	33.1	102.45	0	122.2	2349200000	34	O55029	O55029	Coatomer subunit beta	Copb2
NaN	NaN	NaN	NaN	NaN	25.9324	27.0635	26.6267		5	5	5	53.7	53.7	53.7	12.345	0	11.353	638510000	6	O55042-2;O55042	O55042-2;O55042	Alpha-synuclein	Snca
25.7167	NaN	NaN	25.5093	25.8671	26.4215	25.3098	25.8704		5	5	5	24.9	24.9	24.9	32.898	0	56.412	823110000	8	Q7TMG8;O55126;A0A0G2JEV1	Q7TMG8;O55126	Protein NipSnap homolog 2	Gbas
29.1419	30.0908	29.9562	29.5137	27.955	29.3543	29.3665	28.3462		14	14	14	69.1	69.1	69.1	12.554	0	24.191	9782900000	47	O55142	O55142	60S ribosomal protein L35a	Rpl35a
29.8857	30.4755	29.6588	29.3718	30.4249	30.7425	30.3488	29.8256		41	41	41	34.4	34.4	34.4	114.86	0	323.31	19851000000	121	O55143;O55143-2;Q8R429;B1ATS4;B1ATS5;E9Q559;Q64518;Q64518-3;Q64518-1	O55143;O55143-2	Sarcoplasmic/endoplasmic reticulum calcium ATPase 2	Atp2a2
27.8243	27.7397	27.8714	27.0658	26.3384	26.7064	26.9507	26.9941		7	7	7	21.2	21.2	21.2	51.373	0	16.285	1866700000	20	O55222;D3YZA5;A0A1B0GRF6	O55222	Integrin-linked protein kinase	Ilk
NaN	NaN	NaN	NaN	24.6766	25.4325	NaN	25.9036		5	5	5	26.5	26.5	26.5	28.532	0	12.525	315560000	6	O55234;Q8BTY5	O55234	Proteasome subunit beta type-5	Psmb5
NaN	NaN	25.9786	25.5539	26.5621	27.9847	27.4931	26.7058		13	13	13	28.3	28.3	28.3	63.988	0	119.24	1906600000	22	O70194;A0A2R8VK20	O70194	Eukaryotic translation initiation factor 3 subunit D	Eif3d
28.4964	29.001	28.8929	28.0898	29.6722	30.2888	30.3298	29.4802		11	11	11	61.8	61.8	61.8	24.693	0	320.33	12983000000	42	O70251;A0A087WS46;G3UX43;M0QWK5;M0QWH8;G3UZ47	O70251;A0A087WS46	Elongation factor 1-beta	Eef1b;Eef1b2
25.3862	28.2504	25.6444	25.8172	25.2091	27.718	26.7292	25.7033		10	10	10	23.4	23.4	23.4	56.888	0	71.721	2095800000	22	O70310;F7APP3;A2AJH3;O70311	O70310	Glycylpeptide N-tetradecanoyltransferase 1	Nmt1
30.8358	29.6371	30.5596	31.5555	30.419	29.3621	30.3233	31.0753		59	59	7	59.8	59.8	7.6	109.94	0	262.25	20838000000	139	O70318;Q8C928;A0A1W2P6I5;A0A1W2P7I2;A0A1W2P7I4;A0A1W2P896;A0A1W2P7H7;A0A1W2P6H2;A0A2R8VHB6	O70318;Q8C928	Band 4.1-like protein 2	Epb41l2;Epb4.1l2
NaN	NaN	NaN	25.5356	26.343	26.6091	26.3687	25.8547		7	7	7	48.3	48.3	48.3	23.348	0	32.997	945200000	14	O70378;M0QWY0;M0QWP2;M0QWI7;M0QWC9	O70378;M0QWY0;M0QWP2	ER membrane protein complex subunit 8	Emc8
27.616	NaN	27.7325	27.4436	27.6002	26.2489	27.1323	27.0431		9	9	9	52.3	52.3	52.3	35.774	0	97.115	1938300000	12	O70400;S4R1V0	O70400;S4R1V0	PDZ and LIM domain protein 1	Pdlim1
25.3722	NaN	25.3309	25.5767	NaN	NaN	25.3065	25.4194		2	2	2	8.6	8.6	8.6	28.405	0	11.051	352140000	5	O70435;E0CX62	O70435;E0CX62	Proteasome subunit alpha type-3	Psma3
28.1835	28.4037	28.7777	28.1436	30.1215	30.482	30.086	29.8604		22	22	8	70.5	70.5	29.5	34.741	0	190.86	13970000000	66	O70503	O70503	Very-long-chain 3-oxoacyl-CoA reductase	Hsd17b12
26.7362	26.513	NaN	NaN	26.0497	26.6728	24.3556	NaN		9	9	9	6.1	6.1	6.1	183.77	0	116.6	816240000	14	O88207-2;O88207;A0A5F8MQ70;A3KGE7;Q61245-2;Q61245	O88207-2;O88207	Collagen alpha-1(V) chain	Col5a1
28.8718	28.7651	28.4382	28.0684	28.0601	28.5403	28.6541	27.9272		15	15	15	28.4	28.4	28.4	82.595	0	130.55	4973700000	36	O88325	O88325		Naglu
28.1988	27.3977	27.4023	27.9617	28.3567	27.9248	28.1845	29.912		23	23	23	56.8	56.8	56.8	66.406	0	157.09	4536900000	40	O88342;A0A0J9YU05	O88342	WD repeat-containing protein 1	Wdr1
NaN	NaN	27.5818	NaN	27.1314	27.4	27.3534	26.9749		7	7	7	44	44	44	26.727	0	80.581	1974400000	12	Q91XH6;O88384;F6UHS3;E0CYE5;F6T4B9	Q91XH6;O88384;F6UHS3	Vesicle transport through interaction with t-SNAREs homolog 1B	Vti1b
NaN	NaN	NaN	NaN	26.2325	25.1218	NaN	26.7734		3	3	3	12.1	12.1	12.1	40.801	0	13.942	466170000	6	O88507	O88507	Ciliary neurotrophic factor receptor subunit alpha	Cntfr
27.9032	NaN	27.853	26.6051	28.8401	28.1674	27.5368	28.1796		13	13	13	47.4	47.4	47.4	34.49	0	131.58	3701300000	30	O88531;B1B0P8;B1B0P9	O88531	Palmitoyl-protein thioesterase 1	Ppt1
NaN	NaN	NaN	27.3939	28.4317	28.4536	28.1857	27.935		4	4	4	54	54	54	13.553	0	20.305	4355400000	10	O88653;A0A0G2JGQ3	O88653	Ragulator complex protein LAMTOR3	Lamtor3
25.6974	27.9216	NaN	26.5074	27.5144	27.4309	26.844	27.266		6	6	6	30.5	30.5	30.5	24.452	0	51.05	2248500000	16	O88668;K4DI63;J3QP41	O88668;K4DI63;J3QP41	Protein CREG1	Creg1
26.7505	27.4185	NaN	27.2954	26.862	26.5833	26.9777	26.8876		10	10	10	31.8	31.8	31.8	57.145	0	66.548	1642400000	17	Q3UDC3;O88746;O88746-2;A0A1D5RL90;A0A1D5RM45;A0A1D5RM84	Q3UDC3;O88746	Target of Myb protein 1	Tom1
NaN	24.2781	24.4595	23.8765	24.108	24.2207	24.1573	23.7371		4	4	4	3.3	3.3	3.3	152.4	0	17.577	260470000	5	O89001	O89001	Carboxypeptidase D	Cpd
28.4881	NaN	28.0812	27.765	28.8573	28.4291	27.6855	27.0833		8	8	8	28.5	28.5	28.5	49.372	0	238.1	4056200000	23	O89017	O89017	Legumain	Lgmn
27.6804	27.4141	27.1992	27.1935	28.6495	29.4017	28.0849	28.2805		11	11	11	34.3	34.3	34.3	61.341	0	222.51	5577400000	23	O89023	O89023	Tripeptidyl-peptidase 1	Tpp1
27.3264	NaN	24.9986	24.1653	28.2524	26.2921	24.7495	25.8861		3	3	3	16.3	16.3	16.3	25.976	0	28.234	1456000000	13	P00405	P00405	Cytochrome c oxidase subunit 2	Mtco2
NaN	NaN	NaN	NaN	25.4011	26.5689	25.6587	NaN		8	1	1	53.7	23.5	23.5	15.328	0	143.05	595590000	3	P84244;P02301;E0CZ27	P84244;P02301;E0CZ27	Histone H3.3;Histone H3.3C;Histone H3	H3f3a;H3f3c
28.8887	27.5926	27.3284	27.5941	27.3222	NaN	26.7045	NaN		2	2	2	26.9	26.9	26.9	7.7662	0	3.974	1766900000	8	P03930	P03930	ATP synthase protein 8	Mtatp8
30.2889	31.262	30.8844	33.0613	29.2418	30.0514	30.8146	33.0609		38	38	38	95.1	95.1	95.1	39.355	0	323.31	46553000000	151	P05064;A6ZI44;D3YWI1;D3Z510;A0A0U1RPN8;A0A0U1RPT5;Q9CPQ9;A6ZI46;D3YV98;A6ZI47;P05063	P05064;A6ZI44;D3YWI1;D3Z510;A0A0U1RPN8;A0A0U1RPT5;Q9CPQ9;A6ZI46	Fructose-bisphosphate aldolase A;Fructose-bisphosphate aldolase	Aldoa;Aldoart1
30.3447	29.8195	28.7492	29.7813	30.7165	30.6178	29.3836	30.1381		27	27	27	61.9	61.9	61.9	47.411	0	314.86	17704000000	99	P05202	P05202	Aspartate aminotransferase, mitochondrial	Got2
27.4736	NaN	27.3158	27.1231	28.4989	26.6775	27.4601	NaN		30	5	0	73.6	10.2	0	50.151	0	76.741	1744000000	19	P05213;A0A2R8VHF3	P05213	Tubulin alpha-1B chain	Tuba1b
27.0925	26.6498	27.3456	27.8588	26.8918	26.2531	26.5563	27.4186		11	11	6	26.2	26.2	15.1	59.89	0	54.526	1784100000	18	P05480;P05480-1;Q0VBH4;Q62270;Q922K9;Q62190	P05480;P05480-1	Neuronal proto-oncogene tyrosine-protein kinase Src	Src
28.0767	28.0204	27.84	28.3349	28.1727	27.1224	27.8694	27.9772		12	12	12	14.1	14.1	14.1	108.93	0	38.857	2884100000	24	P05532-2;P05532;P05532-3	P05532-2;P05532	Mast/stem cell growth factor receptor Kit	Kit
30.0789	26.2991	29.7632	28.9681	30.2385	29.5451	29.5329	29.9272		25	25	24	78.3	78.3	78.3	36.498	0	310.85	10901000000	78	P06151;A0A1B0GSX0;A0A1B0GSR9;D3YZQ9;A0A1B0GQX5;A0A1B0GT41;A0A1B0GSL7;A0A1B0GRW9;A0A1B0GS79;A0A1B0GRC1;A0A1B0GRS2;D3YVR7;D3YZE4;P00342;A0A1B0GSR2;A0A1B0GRE9	P06151;A0A1B0GSX0;A0A1B0GSR9;D3YZQ9;A0A1B0GQX5;A0A1B0GT41	L-lactate dehydrogenase A chain;L-lactate dehydrogenase	Ldha
27.3325	27.2797	26.3634	26.6225	28.9963	28.3333	27.9343	28.4986		14	14	14	40.1	40.1	40.1	62.766	0	150.03	4258800000	34	P06745;A0A0U1RP97;A0A0U1RQ18;CON__Q3ZBD7;A0A0U1RQ72	P06745	Glucose-6-phosphate isomerase	Gpi
28.0506	NaN	27.1437	26.1291	28.654	29.248	28.3115	29.1462		11	11	11	41.6	41.6	41.6	37.547	0	119.29	5774600000	25	P06797;A0A1Y7VNQ4;A0A1Y7VNM3;A0A1Y7VP49;A0A1Y7VJC1	P06797	Cathepsin L1;Cathepsin L1 heavy chain;Cathepsin L1 light chain	Ctsl
26.5093	27.6431	27.4662	29.247	27.8394	28.2584	28.3765	29.3369		20	20	20	56.3	56.3	56.3	63.953	0	219.12	4784700000	47	P06801;Q3TQP6	P06801;Q3TQP6	NADP-dependent malic enzyme;Malic enzyme	Me1
33.7134	33.8323	33.7373	33.983	33.422	33.6653	33.5935	34.0421		36	36	36	54	54	54	60.761	0	323.31	212340000000	326	P07147;A2ADJ4;A2ADJ6	P07147;A2ADJ4	5,6-dihydroxyindole-2-carboxylic acid oxidase	Tyrp1
32.3905	32.377	32.9882	33.0076	31.958	32.2567	32.6147	32.7614		51	51	51	88.8	88.8	88.8	38.676	0	323.31	95117000000	232	P07356;B0V2N7;B0V2N5;B0V2N8	P07356;B0V2N7;B0V2N5;B0V2N8	Annexin A2;Annexin	Anxa2
29.5839	28.374	29.3698	29.4176	28.8206	28.048	28.6239	28.7225		35	22	22	50.8	34.4	34.4	84.787	0	167.94	6401900000	67	P07901;B7ZC50;A2A6A2;B7ZC49	P07901	Heat shock protein HSP 90-alpha	Hsp90aa1
NaN	NaN	NaN	NaN	25.1016	27.2342	23.9465	NaN		7	7	7	35.7	35.7	35.7	25.958	0	50.396	794680000	9	P08074;F6YNX9	P08074;F6YNX9	Carbonyl reductase [NADPH] 2	Cbr2
34.0134	34.4832	33.8192	33.0753	33.8479	33.9782	33.5068	33.0201		90	90	86	74.1	74.1	74.1	92.475	0	323.31	222560000000	507	P08113;F7C312	P08113;F7C312	Endoplasmin	Hsp90b1
29.0983	29.1013	29.4893	29.6921	28.7354	29.2137	29.1413	29.2535		9	9	9	84.5	84.5	84.5	11.186	0	50.34	8944500000	37	P08207	P08207	Protein S100-A10	S100a10
25.5633	26.0048	26.0668	26.1944	24.5112	24.9985	25.5765	25.5497		8	8	8	31.2	31.2	31.2	35.866	0	13.879	693120000	13	P08226;A0A1B0GX15;G3UWN5;G3UZM8	P08226	Apolipoprotein E	Apoe
27.803	28.391	28.1856	28.7009	27.8967	28.1367	28.7434	29.1395		11	11	11	62.3	62.3	62.3	15.942	0	52.512	5264000000	38	P08228	P08228	Superoxide dismutase [Cu-Zn]	Sod1
32.8903	31.997	31.6168	31.8744	32.8548	32.4492	31.4271	32.212		40	40	40	77.8	77.8	77.8	35.611	0	323.31	74279000000	202	P08249;A0A0G2JF23;A0A0G2JGY4	P08249	Malate dehydrogenase, mitochondrial	Mdh2
31.0607	29.8401	30.6657	30.8959	31.5599	30.2694	31.2903	31.652		26	26	15	74.4	74.4	54.4	40.489	0	323.31	28692000000	135	P08752;A0A0A6YWA9;B2RSH2;A2AE32;P20612;Q3V3I2;P50149;A2AE31;A2A610;Q8C040;Q8BHK8;A0A0A6YXN0;A0A0A6YXC2;F6QPU5	P08752;A0A0A6YWA9;B2RSH2	Guanine nucleotide-binding protein G(i) subunit alpha-2;Guanine nucleotide-binding protein G(i) subunit alpha-1	Gnai2;Gnai1
31.2973	31.0578	30.9767	30.4779	30.7422	30.823	30.7603	30.5679		29	29	29	46	46	46	88.231	0	238.93	26447000000	90	P09055;P09055-2	P09055;P09055-2	Integrin beta-1	Itgb1
33.26	32.4385	32.3232	31.5746	33.6975	33.3474	33.1512	31.8837		63	63	63	81.9	81.9	81.9	57.058	0	323.31	117990000000	295	P09103;E9Q8G8	P09103	Protein disulfide-isomerase	P4hb
28.1179	28.7157	29.5485	28.186	27.4918	28.3583	28.8108	27.4169		26	26	26	37.3	37.3	37.3	76.722	0	264.21	5845000000	60	P09405	P09405	Nucleolin	Ncl
29.6303	27.6272	29.8637	29.4646	29.5016	29.38	30.076	30.0863		27	27	27	84.9	84.9	84.9	44.55	0	323.31	11508000000	76	P09411;S4R2M7;P09041	P09411;S4R2M7	Phosphoglycerate kinase 1;Phosphoglycerate kinase	Pgk1
27.4959	28.0582	28.1738	27.8354	27.1533	27.0365	27.7135	27.7602		7	7	7	52.2	52.2	52.2	21.066	0	35.812	2654000000	14	P09528;A0A494BA92;A0A494BAP3;A0A494B9D4	P09528	Ferritin heavy chain;Ferritin heavy chain, N-terminally processed	Fth1
NaN	NaN	NaN	26.5933	26.3384	26.6357	25.9608	26.7416		4	4	4	37.8	37.8	37.8	24.603	0	122.93	1085100000	11	P09671;A0A3B2WBF0	P09671;A0A3B2WBF0	Superoxide dismutase [Mn], mitochondrial	Sod2
30.5375	31.2878	30.3524	29.9517	31.9994	30.9021	31.9993	32.1862		15	15	15	61.1	61.1	61.1	16.837	0	323.31	35991000000	90	P0DP28;P0DP27;P0DP26;A0A3Q4EHJ0;Q9D6P8;A0A1Y7VK66;G3UX57	P0DP28;P0DP27;P0DP26;A0A3Q4EHJ0;Q9D6P8	Calmodulin-like protein 3	Calml3
29.422	28.3254	29.3004	28.5328	30.2233	28.7381	30.1749	29.695		23	23	23	68.2	68.2	68.2	38.734	0	323.31	9535500000	78	P10107;A0A494BBD8	P10107;A0A494BBD8	Annexin A1	Anxa1
32.8119	32.2223	33.2512	33.2108	32.7293	33.1014	33.0444	33.1353		31	31	31	64.3	64.3	64.3	50.113	0	323.31	135660000000	256	P10126;D3YZ68;D3Z3I8;P62631	P10126;D3YZ68;D3Z3I8	Elongation factor 1-alpha 1	Eef1a1
30.406	30.9278	31.0261	30.2964	30.3231	30.542	31.1705	30.1642		17	17	17	41	41	41	37.279	0	245.35	26893000000	76	P10605	P10605	Cathepsin B;Cathepsin B light chain;Cathepsin B heavy chain	Ctsb
NaN	NaN	NaN	NaN	NaN	25.811	27.0802	26.9439		6	6	6	55.2	55.2	55.2	11.675	0	112.87	764500000	10	P10639	P10639	Thioredoxin	Txn
25.7312	NaN	25.6521	25.7978	25.4446	24.9867	25.8727	25.8983		4	2	2	28.4	18.8	18.8	23.764	0	4.285	580440000	4	P10833	P10833	Ras-related protein R-Ras	Rras
28.1864	28.1205	28.4705	28.1672	29.0552	28.6392	28.473	29.0522		17	17	17	31.4	31.4	31.4	58.336	0	78.293	5430000000	37	P10852;P10852-2;A0A0U1RP98;A0A0U1RPL8;A0A0U1RPK4;A0A0U1RPG5;A0A0U1RP32	P10852;P10852-2;A0A0U1RP98	4F2 cell-surface antigen heavy chain	Slc3a2
28.8663	29.7392	29.5042	NaN	29.5586	30.6568	29.9024	27.7436		8	8	8	53.2	53.2	53.2	13.992	0	102.76	12873000000	35	Q8CGP2;Q6ZWY9;Q64525;Q64478;Q64475;P10854;P10853;Q8CGP2-2;Q8CBB6;Q8CGP1;Q9D2U9;Q8CGP0;Q64524;P70696	Q8CGP2;Q6ZWY9;Q64525;Q64478;Q64475;P10854;P10853;Q8CGP2-2;Q8CBB6;Q8CGP1;Q9D2U9;Q8CGP0;Q64524;P70696	Histone H2B type 1-P;Histone H2B type 1-C/E/G;Histone H2B type 2-B;Histone H2B type 1-H;Histone H2B type 1-B;Histone H2B type 1-M;Histone H2B type 1-F/J/L;Histone H2B;Histone H2B type 1-K;Histone H2B type 3-A;Histone H2B type 3-B;Histone H2B type 2-E;Histone H2B type 1-A	Hist1h2bp;Hist1h2bc;Hist2h2bb;Hist1h2bh;Hist1h2bb;Hist1h2bm;Hist1h2bf;Hist1h2br;Hist1h2bk;Hist3h2ba;Hist3h2bb;Hist2h2be;Hist1h2ba
29.3661	29.9955	27.2242	NaN	27.837	29.5218	26.926	25.7451		23	23	23	20.9	20.9	20.9	138.03	0	98.938	6100700000	41	P11087;P11087-2;CON__Q862S4	P11087;P11087-2	Collagen alpha-1(I) chain	Col1a1
28.1472	28.8543	28.1665	28.4409	28.3996	27.8525	28.1736	28.7726		12	12	12	29.8	29.8	29.8	60.606	0	69.165	5061100000	41	P11344;A0A140LIB9	P11344	Tyrosinase	Tyr
NaN	NaN	28.7763	28.6638	29.5627	29.9303	29.8465	29.7564		7	7	7	12.8	12.8	12.8	43.865	0	17.324	9786100000	20	P11438	P11438	Lysosome-associated membrane glycoprotein 1	Lamp1
32.1117	30.8287	31.8716	31.7673	31.403	30.6473	31.3414	31.3608		54	50	37	64.2	61.9	50.6	83.28	0	323.31	36110000000	211	P11499;E9Q3D6;E9PX27;D3Z1R1;E9Q0C3	P11499	Heat shock protein HSP 90-beta	Hsp90ab1
25.6742	NaN	25.4421	NaN	26.6074	25.6976	26.8889	26.0132		5	5	5	6.3	6.3	6.3	115.04	0	34.127	835280000	10	P11688	P11688	Integrin alpha-5;Integrin alpha-5 heavy chain;Integrin alpha-5 light chain	Itga5
NaN	26.0899	NaN	NaN	26.8305	26.6687	26.5963	25.8574		10	10	9	5.6	5.6	5.3	306.86	0	48.16	1112200000	14	P11881-8;P11881-7;P11881-6;P11881-5;P11881-4;P11881-2;P11881-3;P11881;A0A0N4SWI0	P11881-8;P11881-7;P11881-6;P11881-5;P11881-4;P11881-2;P11881-3;P11881	Inositol 1,4,5-trisphosphate receptor type 1	Itpr1
28.491	28.0291	27.4264	29.6995	29.1886	27.7824	28.1212	29.6413		26	26	26	65.1	65.1	65.1	60.448	0	249.13	6008800000	68	P11983;P11983-2;F2Z483;A0A3B2WDE2	P11983;P11983-2	T-complex protein 1 subunit alpha	Tcp1
28.6826	27.4312	27.8565	27.6682	28.8111	28.677	28.6803	27.8746		15	15	15	28.9	28.9	28.9	74.194	0	149.14	5208300000	43	P12265;Q99KJ6;D3YY48	P12265	Beta-glucuronidase	Gusb
28.2616	NaN	26.4846	26.7972	29.3103	29.596	27.9269	28.946		6	6	6	54.8	54.8	54.8	16.101	0	110.46	7044500000	25	P12787	P12787	Cytochrome c oxidase subunit 5A, mitochondrial	Cox5a
28.5292	30.8804	30.4196	30.4269	29.5388	31.1817	30.8394	30.047		27	27	27	62.8	62.8	62.8	29.976	0	141.76	23537000000	81	P12970;V9GX35	P12970	60S ribosomal protein L7a	Rpl7a
30.3496	29.1715	30.1204	30.6493	30.3782	29.7121	30.3521	31.2137		32	32	12	45.8	45.8	15.6	80.762	0	285.01	16111000000	94	P13020-2;P13020;CON__Q3SX14;A6PWS5	P13020-2;P13020	Gelsolin	Gsn
28.5144	30.8369	30.3879	29.648	28.4881	30.0648	29.649	28.9796		10	10	10	40.5	40.5	40.5	16.605	0	74.752	12952000000	44	P14115	P14115	60S ribosomal protein L27a	Rpl27a
28.2426	30.8774	30.7003	29.5858	27.8012	30.9093	30.4196	29.4808		17	17	17	69.2	69.2	69.2	16.445	0	52.41	19582000000	66	P14131	P14131	40S ribosomal protein S16	Rps16
29.6988	31.0783	30.899	30.333	29.6243	30.7183	30.7838	29.9136		26	26	26	66.3	66.3	66.3	31.419	0	288.07	25306000000	94	P14148;F6XI62	P14148;F6XI62	60S ribosomal protein L7	Rpl7
26.3729	26.5919	27.2183	26.5838	29.1102	32.0919	31.8167	29.7923		23	23	23	69.2	69.2	69.2	32.838	0	323.31	27084000000	69	P14206;A0A1L1SUK3;A0A1L1SRW0	P14206	40S ribosomal protein SA	Rpsa
33.4244	33.3951	33.6734	33.3295	33.5454	33.6516	33.6146	33.2706		41	41	41	72.4	72.4	72.4	47.994	0	323.31	168320000000	333	P14211	P14211	Calreticulin	Calr
29.752	29.3067	30.6769	30.0946	29.7276	30.793	30.3693	29.9133		22	22	22	61.2	61.2	61.2	34.216	0	246.94	18225000000	77	P14869;D3YVM5;S4R1N1	P14869;D3YVM5;S4R1N1	60S acidic ribosomal protein P0	Rplp0
NaN	NaN	NaN	26.076	26.5756	26.2769	26.7891	27.0924		10	10	10	47.4	47.4	47.4	32.928	0	105.19	1182800000	14	P14901	P14901	Heme oxygenase 1	Hmox1
27.3437	26.9889	27.026	28.2903	26.3675	25.8144	26.3876	27.474		14	8	7	61.9	45.4	39.9	25.716	0	31.945	1883500000	17	P15626;D3YX76;D3YVP5;Q80W21;D3YVP6;E9QAC8;D3YZ29;D3YVP9;G5E8M7;O35660	P15626;D3YX76;D3YVP5;Q80W21;D3YVP6;E9QAC8	Glutathione S-transferase Mu 2;Glutathione S-transferase Mu 7	Gstm2;Gstm7
30.9064	28.2427	30.9259	30.571	30.9497	29.9867	30.8836	30.8725		8	8	8	67.4	67.4	67.4	14.866	0	102.82	20664000000	40	P16045;A0A2R8VHJ0	P16045	Galectin-1	Lgals1
29.1393	28.4348	29.5797	28.7369	28.2896	29.1206	29.5999	29.3115		10	10	10	40.2	40.2	40.2	27.414	0	86.451	8626200000	44	Q8C253;P16110	Q8C253;P16110	Galectin;Galectin-3	Lgals3
30.2616	30.2	30.5453	30.5619	32.504	32.3971	31.9497	32.4967		34	34	34	85.3	85.3	85.3	35.81	0	323.31	65074000000	156	P16858;A0A0A0MQF6;S4R1W1;A0A1D5RLD8;S4R257;S4R1N5;V9GXA7;A0A0R4J0X7;S4R2G5;Q64467;V9GX06	P16858;A0A0A0MQF6;S4R1W1;A0A1D5RLD8;S4R257	Glyceraldehyde-3-phosphate dehydrogenase	Gapdh;Gm3839
30.2262	30.6895	28.7515	29.3416	30.5777	30.4203	30.7078	29.982		9	9	9	15.9	15.9	15.9	45.655	0	24.169	17754000000	33	P17047-3;P17047;P17047-2	P17047-3;P17047;P17047-2	Lysosome-associated membrane glycoprotein 2	Lamp2
31.6959	30.9766	31.6139	31.8128	31.2147	30.5802	31.2738	31.3003		38	38	38	86.2	86.2	86.2	47.14	0	323.31	32848000000	143	P17182;Q6PHC1;B1ARR7;B0QZL1;B1ARR6;P21550;P17183;D3Z2S4;D3Z6E4;A0A0N4SUX5;A0A0N4SUI6;D3YVD3;J3QPZ9;Q5SX59;A0A0N4SUW8;Q5SX61;Q5SX60	P17182;Q6PHC1	Alpha-enolase	Eno1
NaN	NaN	NaN	26.1305	26.5483	27.0537	27.1743	27.3535		17	9	9	24.4	14.3	14.3	105.48	0	66.205	1337600000	17	P17426-2;P17426;A0A140LIG7;A0A140LHG0;A0A0J9YUA7	P17426-2;P17426	AP-2 complex subunit alpha-1	Ap2a1
26.5743	28.0307	27.1727	26.9965	27.6992	27.5869	27.0341	27.0589		18	18	10	28.6	28.6	18.3	104.02	0	95.276	2470000000	28	P17427	P17427	AP-2 complex subunit alpha-2	Ap2a2
26.9711	NaN	26.3143	25.9747	25.9165	25.8829	NaN	25.9056		3	3	3	31.7	31.7	31.7	7.3325	0	8.96	680610000	7	P17665	P17665	Cytochrome c oxidase subunit 7C, mitochondrial	Cox7c
28.9488	28.9589	27.7031	27.969	29.6061	29.4307	27.5956	27.641		31	31	28	46.7	46.7	42.8	102.3	0	319.68	6853100000	65	P17710-3;G3UVV4;P17710-4;P17710;P17710-2;D3YYR4;D3Z365;D3Z105;B4YB29;E9Q3Z4;E9Q8S8;Q3TRM8	P17710-3;G3UVV4;P17710-4;P17710;P17710-2	Hexokinase-1;Hexokinase	Hk1
30.0475	29.6302	29.3931	29.3071	32.1515	31.4393	31.9395	32.1149		16	16	16	83.5	83.5	83.5	17.971	0	233.35	36609000000	84	P17742;A0A1L1SST0;A0A1L1SRX5;V9GXC1;V9GX31	P17742;A0A1L1SST0	Peptidyl-prolyl cis-trans isomerase A;Peptidyl-prolyl cis-trans isomerase A, N-terminally processed	Ppia
29.3053	NaN	29.6029	29.0988	29.2061	27.8963	29.2697	29.7544		15	15	15	67.9	67.9	67.9	26.712	0	214.86	7201400000	53	P17751;P17751-2;H7BXC3	P17751;P17751-2;H7BXC3	Triosephosphate isomerase	Tpi1
32.2649	31.9772	32.3114	31.3925	33.1161	33.1626	32.7996	33.0372		28	28	28	69.5	69.5	69.5	44.953	0	323.31	102270000000	139	P18242;F8WIR1;F6Y6L6;A0A1B0GT66	P18242;F8WIR1;F6Y6L6;A0A1B0GT66	Cathepsin D	Ctsd
24.6728	NaN	NaN	24.9886	23.7758	25.1512	23.627	24.1406		3	3	3	6.9	6.9	6.9	41.709	0	4.3368	389690000	4	P18406	P18406	Protein CYR61	Cyr61
31.2313	28.6262	30.9425	30.7549	33.1814	32.0883	32.5511	33.1638		30	30	23	97.6	97.6	82.5	18.559	0	323.31	66248000000	134	P18760;F8WGL3;A0A494B9A7	P18760;F8WGL3;A0A494B9A7	Cofilin-1	Cfl1
28.3316	28.0249	28.5291	29.3008	27.6197	27.1157	27.9617	28.5471		22	14	14	63.6	47.7	47.7	40.036	0	88.725	3849500000	35	P18872-2;P18872;D3Z2M7;F7BLT7	P18872-2;P18872;D3Z2M7	Guanine nucleotide-binding protein G(o) subunit alpha	Gnao1
30.1247	27.8938	29.4521	29.9784	31.2626	30.4326	30.914	32.0688		12	12	12	54.3	54.3	54.3	23.609	0	111.96	24351000000	56	P19157;A0A494B908;A0A494BAW2;P46425;A0A494BAS3;A0A494BAU3;A0A494BAM8	P19157;A0A494B908;A0A494BAW2	Glutathione S-transferase P 1	Gstp1
28.8143	30.062	29.5209	28.7904	28.0493	29.5463	29.055	28.1546		18	18	18	55.7	55.7	55.7	23.464	0	72.167	10082000000	54	P19253;A0A1B0GS68;A0A1B0GSQ6;A0A1B0GTA1;A0A1B0GSB2;A0A1B0GQW6;A0A1B0GSF0;A0A1B0GSC2;A0A1B0GRH1;A0A1B0GT00;A0A1B0GSL5;A0A1B0GSJ2	P19253;A0A1B0GS68;A0A1B0GSQ6;A0A1B0GTA1;A0A1B0GSB2;A0A1B0GQW6;A0A1B0GSF0	60S ribosomal protein L13a	Rpl13a
33.4725	32.9593	32.8704	31.7037	33.6358	34.2378	33.054	32.6725		51	51	51	85.6	85.6	85.6	46.533	0	323.31	168670000000	324	P19324;A0A140LHR4;A0A140LHK0;A0A140LHD6	P19324	Serpin H1	Serpinh1
27.4958	26.6167	27.1104	26.9554	26.4998	26.6099	NaN	26.2959		4	4	4	29.5	29.5	29.5	13.847	0	9.6414	1506900000	16	Q9D881;P19536;F7C106;A0A0A6YVR0	Q9D881;P19536	Cytochrome c oxidase subunit 5B, mitochondrial	Cox5b
26.3262	NaN	25.8998	26.6431	28.5946	30.1804	27.8036	28.0781		11	11	11	54.4	54.4	54.4	19.53	0	41.15	5874000000	23	P19783;M0QWX7	P19783	Cytochrome c oxidase subunit 4 isoform 1, mitochondrial	Cox4i1
34.5316	33.9702	34.5213	34.0035	34.2686	34.4314	34.2736	33.7733		78	78	76	65.2	65.2	65.2	72.421	0	323.31	299330000000	552	P20029	P20029	78 kDa glucose-regulated protein	Hspa5
29.0247	28.7869	28.5096	28.8322	28.4192	29.3612	28.7481	29.0255		22	22	22	42.9	42.9	42.9	61.115	0	146.44	7182500000	58	P20060	P20060	Beta-hexosaminidase subunit beta	Hexb
26.9251	26.8257	27.1314	27.069	26.1045	25.3855	26.684	26.3193		1	1	1	29.5	29.5	29.5	5.0526	0	11.534	1115700000	6	P20065-2;P20065	P20065-2;P20065	Thymosin beta-4;Hematopoietic system regulatory peptide	Tmsb4x
28.401	27.4825	27.156	27.6661	27.5429	27.5226	26.6694	27.0315		7	7	7	33.9	33.9	33.9	28.127	0	55.962	2900000000	28	P20108	P20108	Thioredoxin-dependent peroxide reductase, mitochondrial	Prdx3
31.028	30.7595	31.7774	30.7025	31.3937	31.3253	32.1802	31.0873		54	54	50	84.8	84.8	83	53.687	0	323.31	39226000000	176	P20152;A0A0A6YWC8;A2AKJ2;P31001;G5E846;A0A2R8W6R6;G3X981;P15331-3;P15331;P15331-2;D3YZ35;A0A0R4J036;P46660;P08553;P08551	P20152;A0A0A6YWC8	Vimentin	Vim
30.9298	29.5727	30.6459	31.321	30.0902	28.9373	29.7576	30.4676		36	36	0	88.3	88.3	0	29.02	0	114.75	17499000000	118	P21107-2;D3Z2H9	P21107-2;D3Z2H9		Tpm3-rs7
27.8168	26.9156	27.6553	27.4727	28.2142	27.0985	27.4862	28.3729		13	13	6	46.5	46.5	24	42.024	0	111.21	2819600000	35	P21278;A0A0G2JG40;O70443;P27600	P21278	Guanine nucleotide-binding protein subunit alpha-11	Gna11
27.1166	NaN	NaN	26.4175	27.887	25.8669	26.3647	27.0431		13	7	6	44.6	27.9	23.7	42.158	0	80.701	1403700000	12	P21279	P21279	Guanine nucleotide-binding protein G(q) subunit alpha	Gnaq
27.0111	NaN	27.1993	26.7749	26.8142	27.5711	27.0626	26.6312		7	7	7	54.3	54.3	54.3	15.531	0	25.742	2205100000	17	P21460;A2APX3	P21460;A2APX3	Cystatin-C	Cst3
26.9808	28.1591	27.0212	26.5184	27.7765	27.3472	27.4659	25.7297		13	13	13	36.9	36.9	36.9	47.169	0	37.714	2381700000	23	P21956-2;P21956	P21956-2;P21956	Lactadherin	Mfge8
NaN	NaN	NaN	NaN	23.8663	23.7457	24.7745	NaN		3	3	3	5.4	5.4	5.4	77.06	0	3.9713	151300000	4	P21981;G3UXE8	P21981	Protein-glutamine gamma-glutamyltransferase 2	Tgm2
26.3977	26.823	NaN	26.3462	25.899	27.4201	27.2539	26.3492		10	10	10	16.7	16.7	16.7	91.721	0	111.51	1679500000	15	Q8CBB7;P22892	Q8CBB7;P22892	AP-1 complex subunit gamma-1	Ap1g1
27.8941	29.1338	28.2432	27.8306	27.1356	27.796	28.3727	27.7246		27	27	27	23.4	23.4	23.4	161.93	0	148.46	4311100000	39	P23116;A0A494B9I0	P23116	Eukaryotic translation initiation factor 3 subunit A	Eif3a
NaN	NaN	26.2694	NaN	27.9204	28.4239	27.6386	27.3318		14	14	14	23.3	23.3	23.3	73.12	0	135.4	2532200000	21	P23780;A0A1L1SSJ7	P23780	Beta-galactosidase	Glb1
30.3958	31.2828	30.689	30.8259	29.6825	30.2123	30.0389	29.9731		37	37	37	64.5	64.5	64.5	59.795	0	323.31	21065000000	115	P24270;A2AL20	P24270	Catalase	Cat
31.0099	29.0503	30.786	30.0977	30.9688	31.2415	30.7626	30.4561		22	22	22	72.2	72.2	72.2	23.713	0	140.96	29773000000	112	P24369	P24369	Peptidyl-prolyl cis-trans isomerase B	Ppib
NaN	NaN	27.6367	NaN	27.5389	26.0347	27.0553	26.3585		6	6	6	20.9	20.9	20.9	31.172	0	16.654	1356800000	12	P24668	P24668	Cation-dependent mannose-6-phosphate receptor	M6pr
28.4448	30.9922	31.1643	30.4017	28.702	30.8689	30.8151	29.9366		22	22	22	66.9	66.9	66.9	31.231	0	175.56	22564000000	61	P25444;D3YVC1;D3YWJ3	P25444;D3YVC1;D3YWJ3	40S ribosomal protein S2	Rps2
30.5334	29.2632	29.6249	30.8064	31.3884	30.8663	30.9522	31.6975		95	95	95	53.8	53.8	53.8	269.82	0	323.31	28301000000	247	P26039;E9PUM4;A0A1L1SQ51;Q71LX4;A2AIM2;Q8CDM9;A0A1L1SRI1;A0A1L1SQP9;F6SX70;F6S1V7	P26039	Talin-1	Tln1
30.085	29.6806	29.8979	30.1733	29.6653	29.0316	29.7833	30.1127		47	33	31	64.2	53.4	47.4	69.406	0	226.18	11974000000	73	P26040	P26040	Ezrin	Ezr
33.6384	33.2779	33.7155	34.0781	33.1097	32.457	33.1109	33.4595		76	76	57	81.3	81.3	64.3	67.766	0	323.31	141070000000	387	P26041	P26041	Moesin	Msn
29.515	28.5661	29.4693	29.6723	29.6043	28.8622	29.5615	29.6801		46	25	25	62.3	41.3	41.3	68.542	0	244.55	9655500000	81	P26043;A0A5F8MPB9;Q7TSG6	P26043;A0A5F8MPB9;Q7TSG6	Radixin	Rdx
28.9057	27.0919	28.4991	29.2099	29.0433	28.6141	28.9862	30.2435		35	35	35	53.8	53.8	53.8	100.11	0	323.31	8128100000	94	P26231;A0A494BAD0;A0A494BAM5;E0CXB9;Q61301-2;Q61301-3;Q61301;A0A494BBB4;Q8BS72;A0A494BA24;A0A494BBA4;REV__Q9JMB1-2;REV__Q9JMB1;Q65CL1	P26231	Catenin alpha-1	Ctnna1
NaN	NaN	25.6787	NaN	25.2672	25.3392	25.217	25.0636		4	4	4	16.9	16.9	16.9	33.901	0	7.2786	523240000	4	Q3KQM4;Q80XR5;P26369	Q3KQM4;Q80XR5;P26369	Splicing factor U2AF 65 kDa subunit	U2af2
30.1368	30.0786	29.5916	29.6759	29.5313	29.9386	28.9777	29.1399		34	34	34	60.2	60.2	60.2	61.336	0	208.12	12449000000	94	P26443;F7CFA5	P26443	Glutamate dehydrogenase 1, mitochondrial	Glud1
26.4347	25.7229	26.4225	26.3487	26.5894	24.5216	25.3581	26.378		6	6	6	13.2	13.2	13.2	61.166	0	9.8741	784920000	10	Q8C483;P26638;A2AFS1;A2AFS0	Q8C483;P26638;A2AFS1;A2AFS0	Serine--tRNA ligase, cytoplasmic	Sars
28.4832	29.4385	28.5065	NaN	28.2683	28.3266	29.4976	29.0641		11	11	11	43	43	43	29.661	0	29.826	6439500000	21	P26645	P26645	Myristoylated alanine-rich C-kinase substrate	Marcks
25.1984	26.8506	26.7133	27.5294	26.8338	30.4589	29.5215	29.1298		30	30	30	37.4	37.4	37.4	117.34	0	255.49	8431300000	69	P27546-2;P27546;P27546-3;A0A140T8T5;E9PZ43;A0A0G2JFH2;A0A0G2JDN7;P27546-4;A0A0G2JG35;A0A0G2JFT4;A0A0G2JFK3;A0A0G2JDY5;Q78TF3;A0A0G2JE57;A0A0G2JDU1	P27546-2;P27546;P27546-3;A0A140T8T5	Microtubule-associated protein 4	Map4
24.6756	NaN	24.7746	25.3818	25.418	24.4221	24.9339	25.8866		4	3	3	10.1	8	8	44.054	0	5.5535	365230000	6	P27601;Q9D034	P27601;Q9D034	Guanine nucleotide-binding protein subunit alpha-13	Gna13
28.9228	29.5216	30.6459	30.2775	30.2828	31.4158	30.864	30.1381		34	34	34	61.3	61.3	61.3	46.109	0	323.31	26309000000	104	P27659;A0A2R8VHN4;A0A087WQK0;A0A087WNS0;Q9CQ09;E9PWZ3	P27659	60S ribosomal protein L3	Rpl3
33.8013	32.4442	33.3641	32.4508	34.4524	34.4702	34.6549	33.6915		79	79	78	83.2	83.2	80.2	56.678	0	323.31	248330000000	455	P27773;F6Q404	P27773	Protein disulfide-isomerase A3	Pdia3
27.402	NaN	27.507	27.2332	27.2514	26.6656	26.7356	27.1466		6	6	4	15.8	15.8	12.8	42.732	0	31.793	1751900000	21	Q3TF41;Q8BSH9;P28656	Q3TF41;Q8BSH9;P28656	Nucleosome assembly protein 1-like 1	Nap1l1
30.2744	28.8941	29.6202	28.6344	29.8688	30.1845	29.623	29.6195		17	17	17	37.4	37.4	37.4	65.018	0	73.242	13113000000	45	Q3U9N4;P28798;H3BJE0;H3BJ90;H3BLC9	Q3U9N4;P28798;H3BJE0	Granulins;Acrogranin;Granulin-1;Granulin-2;Granulin-3;Granulin-4;Granulin-5;Granulin-6;Granulin-7	Grn
27.3562	30.3996	28.8653	28.5298	29.3754	30.6408	30.6575	30.0852		34	34	26	50.3	50.3	36.9	70.67	0	288.98	16617000000	83	P29341;Q9D4E6;Q62029;A0A2I3BR37;F6ZAX1;A2A5N3;Q8C7D3	P29341	Polyadenylate-binding protein 1	Pabpc1
NaN	NaN	26.4506	NaN	27.7306	26.5979	27.4804	28.102		16	7	7	65.9	43.8	43.8	37.379	0	97.254	1626400000	14	P29387;A0A0A6YVN9;V9GWY1	P29387	Guanine nucleotide-binding protein subunit beta-4	Gnb4
28.9576	28.005	28.5251	27.9308	29.9549	29.6938	29.3942	29.1687		27	27	27	54.5	54.5	54.5	60.612	0	323.31	10310000000	72	P29416	P29416	Beta-hexosaminidase subunit alpha	Hexa
27.0912	26.7684	26.498	27.55	NaN	NaN	NaN	26.2876		2	2	2	23.5	23.5	23.5	8.9723	0	12.243	946260000	9	P29595	P29595	NEDD8	Nedd8
30.8598	30.7248	29.5321	30.0465	30.5187	30.1158	29.38	29.7187		32	32	32	82.2	82.2	82.2	48.354	0	323.31	18058000000	107	P29758	P29758	Ornithine aminotransferase, mitochondrial	Oat
32.9202	33.4562	33.6095	33.117	32.7383	33.0413	32.9307	32.8047		39	39	39	49.9	49.9	49.9	58.51	0	323.31	129260000000	262	P29812	P29812	L-dopachrome tautomerase	Dct
28.0788	26.386	26.827	26.7423	28.5621	27.6596	27.0284	26.8627		11	11	11	48.1	48.1	48.1	22.794	0	79.418	2459100000	23	P30412	P30412	Peptidyl-prolyl cis-trans isomerase C	Ppic
26.3523	NaN	NaN	26.5559	25.9118	25.6929	25.3629	26.2475		6	6	6	16.4	16.4	16.4	51.572	0	10.642	794840000	9	P30416;F7CAT1;F6S2D5	P30416	Peptidyl-prolyl cis-trans isomerase FKBP4;Peptidyl-prolyl cis-trans isomerase FKBP4, N-terminally processed	Fkbp4
NaN	NaN	NaN	NaN	24.8809	25.6753	NaN	25.003		5	5	5	25.1	25.1	25.1	35.166	0	13.728	517420000	7	Q3UZG4;P31230;A0A0G2JDH0;A0A0G2JEU9;A0A0G2JDW6	Q3UZG4;P31230	Aminoacyl tRNA synthase complex-interacting multifunctional protein 1;Endothelial monocyte-activating polypeptide 2	Aimp1
27.5576	28.2172	27.4298	28.6742	27.5721	26.6899	28.0128	28.8093		8	8	8	72.4	72.4	72.4	10	0	26.208	3649100000	19	P31786;Q4VWZ5;D3Z563;M0QWU8	P31786;Q4VWZ5;D3Z563;M0QWU8	Acyl-CoA-binding protein	Dbi
27.6024	28.7515	27.9281	28.2241	26.8131	27.5217	27.3952	27.4329		11	11	11	63.6	63.6	63.6	15.236	0	25.488	2988300000	17	P32020-2;P32020	P32020-2;P32020	Non-specific lipid-transfer protein	Scp2
NaN	26.9187	26.2295	25.1123	25.0749	26.4661	26.1962	25.3507		8	8	8	33.8	33.8	33.8	40.512	0	100.72	1008600000	14	P32233;F7BQ65	P32233	Developmentally-regulated GTP-binding protein 1	Drg1
NaN	NaN	NaN	NaN	25.7735	NaN	25.8935	26.0664		7	3	2	50.5	22.3	14.4	21.482	0	3.9998	336820000	5	P32883-2;P32883;C0H5X4;Q61411-2	P32883-2;P32883;C0H5X4;Q61411-2	GTPase KRas;GTPase KRas, N-terminally processed	Kras;Hras
NaN	NaN	NaN	NaN	24.6209	23.6	NaN	24.4817		4	4	4	8.9	8.9	8.9	68.034	0	9.6376	163250000	6	P35235;P35235-1	P35235;P35235-1	Tyrosine-protein phosphatase non-receptor type 11	Ptpn11
27.9944	NaN	NaN	27.2022	28.3808	28.3404	28.2914	27.8206		11	11	7	65.7	65.7	48.1	23.412	0	121.81	3428500000	33	P35278;Q8C266;A2A5F5;A2A5F6	P35278;Q8C266	Ras-related protein Rab-5C	Rab5c
27.9473	28.5317	28.0496	27.9552	27.8577	27.3018	27.3465	27.1072		10	10	3	50	50	18.8	23.545	0	36.601	3168600000	26	P35279-2;P35279;D3YV69;A0A1L1SRS6	P35279-2;P35279;D3YV69	Ras-related protein Rab-6A	Rab6a
NaN	NaN	NaN	NaN	NaN	26.6842	26.0553	26.3239		9	9	9	33.8	33.8	33.8	24.106	0	89.253	968700000	13	P35282;A0A1W2P6Z4	P35282	Ras-related protein Rab-21	Rab21
28.7337	27.6568	28.2165	27.2804	27.3893	27.2145	27.0295	26.3187		6	6	6	35	35	35	23.035	0	19.779	2349700000	17	P35293;A0A452J8C1;A0A3Q4EI12;A0A3Q4EIF7	P35293;A0A452J8C1;A0A3Q4EI12	Ras-related protein Rab-18	Rab18
28.865	27.6314	27.7774	28.0592	28.3502	28.8065	27.295	27.8357		23	23	23	63.1	63.1	63.1	43.231	0	274.07	4775900000	42	P35486;P35487	P35486	Pyruvate dehydrogenase E1 component subunit alpha, somatic form, mitochondrial	Pdha1
31.3403	32.2002	31.6366	31.3065	30.3176	30.5917	30.1647	29.854		32	32	32	40.3	40.3	40.3	67.277	0	323.31	31868000000	127	P35564	P35564	Calnexin	Canx
26.9786	27.9935	27.5669	26.711	26.7688	26.7964	26.1582	26.5926		12	12	12	40.9	40.9	40.9	48.542	0	32.471	1726300000	21	P35585;A0A0R4IZX6;A0A0R4J1L4;Q9WVP1;Q9WVP1-2;D3YZ71;A0A1D5RLW6;A0A1L1SUA0;A0A1D5RLL9;A0A1D5RMJ1;S4R1Q4	P35585	AP-1 complex subunit mu-1	Ap1m1
32.0497	30.7892	31.5907	32.7327	32.3192	31.7056	31.6704	33.6435		32	32	31	92	92	92	22.176	0	246.85	68275000000	188	P35700;B1AXW5;B1AXW6;B1AXW4	P35700;B1AXW5;B1AXW6;B1AXW4	Peroxiredoxin-1	Prdx1
NaN	NaN	NaN	25.4124	24.9172	25.6452	25.2045	24.9989		5	5	5	18.8	18.8	18.8	49.593	0	40.927	574170000	5	P35821	P35821	Tyrosine-protein phosphatase non-receptor type 1	Ptpn1
29.8431	29.564	30.7684	29.8608	29.5806	30.3382	30.1587	29.4501		14	14	14	82.4	82.4	82.4	17.804	0	106.32	18034000000	50	P35979	P35979	60S ribosomal protein L12	Rpl12
29.8918	30.6653	30.4457	30.1121	29.4215	30.5722	30.6672	29.8921		18	18	18	54.3	54.3	54.3	21.644	0	69.45	19176000000	59	P35980;A0A1B0GSS8;A0A1B0GQU8;A0A1B0GSF7;A0A1B0GSA8;A0A1B0GS28;A0A1B0GRZ3	P35980;A0A1B0GSS8;A0A1B0GQU8;A0A1B0GSF7	60S ribosomal protein L18	Rpl18
28.3164	27.6137	28.022	28.5132	29.6209	30.686	30.3393	29.7927		45	45	45	62.2	62.2	62.2	77.043	0	323.31	14463000000	108	P37040;Q05DV1;E9Q997;E9PVT9;F6R7H8	P37040;Q05DV1	NADPH--cytochrome P450 reductase	Por
27.1409	27.8112	27.8566	26.4675	27.3947	28.0923	26.658	NaN		11	11	11	60.2	60.2	60.2	22.576	0	110.61	2317500000	12	P37804;A0A1L1STN8	P37804;A0A1L1STN8	Transgelin	Tagln
31.8021	31.2782	30.5845	30.8764	31.0312	30.6795	29.8339	29.9415		46	46	46	63.8	63.8	63.8	73.46	0	323.31	26928000000	156	P38647	P38647	Stress-70 protein, mitochondrial	Hspa9
30.3838	28.6058	29.8578	29.763	30.9249	30.0487	30.1848	31.1003		33	33	33	75.3	75.3	75.3	51.564	0	323.31	17186000000	107	P40124;B1ARS0	P40124	Adenylyl cyclase-associated protein 1	Cap1
28.3111	29.5336	28.094	28.6294	27.5906	29.6018	28.7112	29.397		25	25	25	57.6	57.6	57.6	67.63	0	285.44	8586300000	71	P40142;A0A286YE28;E0CY51	P40142;A0A286YE28	Transketolase	Tkt
NaN	NaN	26.6733	27.1932	28.2162	26.5945	26.5966	27.5414		3	3	3	16.4	16.4	16.4	25.258	0	145.17	1646900000	10	P40240	P40240	CD9 antigen	Cd9
30.0901	30.1812	28.8531	29.0266	27.8471	29.7601	28.9204	28.2573		12	12	12	53.3	53.3	53.3	15.733	0	37.59	10798000000	42	P41105;F6Z0X0	P41105	60S ribosomal protein L28	Rpl28
28.4942	28.5055	26.5938	27.8806	27.7425	27.7794	26.8313	27.3362		11	11	11	39.8	39.8	39.8	32.25	0	125.92	3344900000	24	P42125;A0A3Q4EC00;A0A452J8A5;A0A3Q4EC76	P42125;A0A3Q4EC00;A0A452J8A5	Enoyl-CoA delta isomerase 1, mitochondrial	Eci1
31.0025	30.9728	30.6317	30.9553	30.889	30.9804	30.6562	30.6851		32	32	3	85.3	85.3	8	41.525	0	300.32	27585000000	127	P42208;F6WYM0;D3YYB1;D3Z3C0;D3Z1S1;D3YZU7;D3YV76	P42208;F6WYM0;D3YYB1;D3Z3C0	Septin-2	2022-09-02
26.0548	NaN	26.4878	26.5826	25.6956	27.8035	28.1964	27.2477		13	13	10	35.2	35.2	28.7	34.883	0	42.726	2323300000	21	P42669	P42669	Transcriptional activator protein Pur-alpha	Pura
28.3086	27.126	27.8031	28.9959	28.12	27.1687	27.8096	28.8545		19	19	19	42.9	42.9	42.9	59.555	0	52.082	3920600000	44	P42932;H3BL49;H3BJB6;H3BKG2;H3BKR8;H3BLL1	P42932;H3BL49;H3BJB6	T-complex protein 1 subunit theta	Cct8
28.8568	25.8621	26.9733	27.3084	28.6288	28.1693	27.3209	27.4583		3	3	3	34.8	34.8	34.8	12.483	0	52.555	3724700000	16	Q9DCW5;P43024	Q9DCW5;P43024	Cytochrome c oxidase subunit 6A, mitochondrial;Cytochrome c oxidase subunit 6A1, mitochondrial	Cox6a1
NaN	NaN	25.5295	NaN	24.5057	25.9828	25.2269	NaN		8	6	6	36.3	25.6	25.6	22.576	0	10.69	584650000	7	P43276	P43276	Histone H1.5	Hist1h1b
NaN	NaN	25.4393	NaN	24.6004	27.9591	27.1731	24.9079		8	8	6	29.4	29.4	18.6	22.099	0	16.403	1662400000	12	P43277;P15864;P43274;I7HFT9;Q07133;P43275	P43277;P15864;P43274	Histone H1.3;Histone H1.2;Histone H1.4	Hist1h1d;Hist1h1c;Hist1h1e
28.6081	28.0861	28.7226	27.5601	28.8886	28.8258	29.0452	28.7828		30	30	30	36	36	36	115.36	0	250.75	6198600000	70	P43406;A2AKI5;F6W6Q6;B7ZCI9	P43406;A2AKI5	Integrin alpha-V;Integrin alpha-V heavy chain;Integrin alpha-V light chain	Itgav
26.8938	NaN	26.5888	26.1351	27.1713	26.3986	27.3626	27.5631		12	5	5	63.9	42.2	42.2	18.709	0	26.765	1432800000	13	P45591;A0A1Y7VJ71	P45591	Cofilin-2	Cfl2
28.4414	28.81	28.6019	27.899	27.1803	27.319	27.7122	27.2937		6	6	6	36.4	36.4	36.4	15.344	0	60.85	3518700000	27	P45878	P45878	Peptidyl-prolyl cis-trans isomerase FKBP2	Fkbp2
29.2332	29.8076	28.0508	28.7862	29.0948	29.2526	27.5609	28.2137		20	20	20	56.8	56.8	56.8	46.481	0	261.9	7808600000	60	P45952;D6RFD7;D3Z2A5	P45952	Medium-chain specific acyl-CoA dehydrogenase, mitochondrial	Acadm
28.3371	28.2611	27.7086	27.4703	27.8692	27.638	27.4885	28.0118		19	19	19	31	31	31	82.613	0	124.61	3386200000	42	P46460;G3UX86;G3UX98	P46460	Vesicle-fusing ATPase	Nsf
25.2243	NaN	NaN	25.2177	26.2014	25.028	25.5778	25.7915		5	5	5	15.6	15.6	15.6	52.866	0	26.804	506600000	9	Q8BVQ9;P46471	Q8BVQ9;P46471	26S protease regulatory subunit 7	Psmc2
28.5046	26.8472	26.5904	26.9751	28.1947	27.9865	28.5165	28.9546		25	25	25	28.7	28.7	28.7	132.05	0	102.76	3737800000	51	Q7TQD7;P46735;E9QNH6;E9Q580;P46735-2;D3YV80;O88329	Q7TQD7;P46735;E9QNH6;E9Q580;P46735-2	Unconventional myosin-Ib	Myo1b
NaN	NaN	26.6614	NaN	28.0658	28.0171	27.7595	27.657		5	5	5	8.5	8.5	8.5	80.597	0	177.09	2469900000	13	P46978	P46978	Dolichyl-diphosphooligosaccharide--protein glycosyltransferase subunit STT3A	Stt3a
31.2661	32.2925	30.492	32.0469	32.4334	31.3915	30.4885	31.7684		44	44	44	69.9	69.9	69.9	56.537	0	323.31	51508000000	184	P47738;A0A0G2JEU1;A0A0G2JF60;A0A0G2JFQ0;D3YYF3;G3UWP3;P24549;O35945;Q9JHW9;Q62148;Q9CZS1	P47738;A0A0G2JEU1	Aldehyde dehydrogenase, mitochondrial	Aldh2
28.0051	NaN	28.0037	27.6735	27.3373	26.3469	27.3268	27.5487		8	6	6	41.3	31.8	31.8	32.953	0	72.504	2234900000	15	Q5RKN9;P47753;A0A0G2JE27	Q5RKN9;P47753;A0A0G2JE27	F-actin-capping protein subunit alpha-1	Capza1
28.6353	27.9562	28.6192	28.7286	28.507	27.7799	28.4003	28.3874		12	12	10	58	58	48.6	32.967	0	170.36	4154400000	47	P47754;D6RCW7;A0A0N4SVM0	P47754;D6RCW7;A0A0N4SVM0	F-actin-capping protein subunit alpha-2	Capza2
28.9803	27.5088	28.7535	28.8206	28.2152	27.6404	28.5039	27.878		12	12	12	50	50	50	30.628	0	173.77	4927300000	38	P47757-2;A2AMW0;P47757-4;P47757;F7CAZ6;A0A0A0MQI9;F6YHZ8	P47757-2;A2AMW0;P47757-4;P47757;F7CAZ6	F-actin-capping protein subunit beta	Capzb
30.2235	30.8983	30.4631	30.445	30.6438	31.3984	31.2729	30.1279		24	24	24	50.3	50.3	50.3	33.509	0	142.11	27702000000	84	P47911;A0A0J9YU32	P47911	60S ribosomal protein L6	Rpl6
27.0445	28.6566	28.5395	28.4675	27.6199	30.0899	30.2913	29.5722		10	10	10	41.2	41.2	41.2	17.587	0	21.329	10127000000	27	P47915;W4VSN7;A0A1L1SS27;A0A1L1SUN1;A0A1L1STJ3	P47915;W4VSN7	60S ribosomal protein L29	Rpl29;Gm3550
29.8607	NaN	30.0928	28.692	30.4831	30.7857	30.6205	29.93		5	5	5	84.2	84.2	84.2	11.475	0	257.52	20851000000	26	P47955	P47955	60S acidic ribosomal protein P1	Rplp1
29.9293	30.8424	31.1725	30.7502	29.4682	30.8992	30.7655	29.9908		20	20	20	55.2	55.2	55.2	34.4	0	194.79	26078000000	106	P47962;D3YYV8	P47962;D3YYV8	60S ribosomal protein L5	Rpl5
28.5366	31.1813	30.2452	29.7107	28.959	29.8695	30.1776	29.319		18	18	18	50.7	50.7	50.7	24.305	0	85.604	16229000000	51	P47963	P47963	60S ribosomal protein L13	Rpl13
27.1556	NaN	NaN	NaN	28.0845	28.1504	27.9291	27.9644		5	5	5	58.4	58.4	58.4	12.746	0	170.5	2487500000	12	P48024;J3QN87;A0A1L1SSA3;J3QPZ8;Q9CXU9	P48024	Eukaryotic translation initiation factor 1	Eif1
30.4554	29.5331	29.9931	30.0099	31.7024	30.3634	31.0405	31.0849		36	36	36	93.4	93.4	93.4	35.752	0	292.62	22649000000	108	P48036;A0A0G2JGQ0	P48036	Annexin A5	Anxa5
26.0815	NaN	26.1918	NaN	25.8396	27.4428	26.6974	24.1163		13	13	12	24.1	24.1	22.9	74.237	0	26.652	1259000000	20	P48678;P48678-2;P48678-3;D3YUF7;A0A0R4J0Q5;P21619-2;P21619	P48678;P48678-2;P48678-3	Prelamin-A/C;Lamin-A/C	Lmna
31.2673	31.0368	29.846	30.1966	32.3823	32.4949	31.2348	32.0172		40	40	24	77.5	77.5	58.1	32.904	0	323.31	54112000000	136	P48962;Q3V132	P48962	ADP/ATP translocase 1	Slc25a4
NaN	NaN	NaN	NaN	NaN	23.4623	23.6728	24.8279		2	2	2	8.4	8.4	8.4	40.466	0	15.196	145750000	3	P49813	P49813	Tropomodulin-1	Tmod1
NaN	NaN	NaN	NaN	27.0047	25.7582	25.7432	NaN		5	5	5	16.6	16.6	16.6	53.748	0	56.44	777490000	7	P50428;F6QGM0	P50428	Arylsulfatase A	Arsa
30.9566	29.7164	31.2001	31.0471	31.8051	31.0899	31.4013	31.3987		47	47	47	91.6	91.6	91.6	68.325	0	323.31	34483000000	179	P50516;P50516-2;D3Z1B9;D3YWH3;D3YZ23	P50516;P50516-2	V-type proton ATPase catalytic subunit A	Atp6v1a
29.4091	28.9635	29.7455	29.2049	29.6041	28.6825	29.4255	29.1059		21	21	21	67.3	67.3	67.3	26.157	0	267.64	8488900000	56	P50518;A0A0N4SW34;A0A0N4SW07;A0A0N4SWA3;Q9D593	P50518	V-type proton ATPase subunit E 1	Atp6v1e1
25.7934	NaN	26.3215	NaN	26.2545	26.456	27.3466	24.4797		6	6	6	93.9	93.9	93.9	11.083	0	60.489	952240000	12	P50543	P50543	Protein S100-A11	S100a11
27.771	27.8764	28.5546	26.8538	27.508	28.9138	28.6808	27.8498		22	22	22	63.5	63.5	63.5	43.698	0	148.02	5297700000	38	P50580;P50580-2	P50580;P50580-2	Proliferation-associated protein 2G4	Pa2g4
29.6174	27.7852	29.6156	28.953	30.4766	30.6594	30.5522	30.5232		20	20	20	77.8	77.8	77.8	23.489	0	323.31	17213000000	71	P51150;A0A0N4SVG9;A0A0N4SVR6	P51150;A0A0N4SVG9;A0A0N4SVR6	Ras-related protein Rab-7a	Rab7a
29.106	26.8709	26.9381	27.9119	29.7534	30.2113	30.404	29.6226		19	19	19	62.5	62.5	62.5	21.881	0	147.16	12206000000	52	P51410;A0A140T8T4;D3Z629;A0A0G2JES3;D3YZT0;A0A0G2JFQ3;S4R1R7	P51410;A0A140T8T4;D3Z629;A0A0G2JES3;D3YZT0	60S ribosomal protein L9	Rpl9
NaN	NaN	NaN	25.7472	25.544	24.4028	24.9228	25.525		5	5	5	6.1	6.1	6.1	139.49	0	8.9988	434830000	9	P51432;A0A494B9C1;A0A494BAY4;Q8C8I0	P51432;A0A494B9C1	1-phosphatidylinositol 4,5-bisphosphate phosphodiesterase beta-3	Plcb3
26.2822	NaN	26.2377	NaN	26.9085	27.0576	27.0777	26.2463		12	12	12	37.5	37.5	37.5	47.844	0	129.76	1492600000	27	Q8BGZ6;P51569;A2BDV6	Q8BGZ6;P51569	Alpha-galactosidase A	Gla
30.4756	30.7369	30.547	30.6317	30.3866	30.8163	30.5072	30.544		43	43	43	65.9	65.9	65.9	79.481	0	323.31	25332000000	132	P51660	P51660	Peroxisomal multifunctional enzyme type 2;(3R)-hydroxyacyl-CoA dehydrogenase;Enoyl-CoA hydratase 2	Hsd17b4
29.1911	29.0627	28.6229	29.0344	29.9506	30.0984	29.7716	29.4739		21	21	21	58.4	58.4	58.4	40.301	0	323.31	11614000000	61	P51863	P51863	V-type proton ATPase subunit d 1	Atp6v0d1
29.0154	27.955	27.5291	26.8797	30.6723	30.5941	29.7813	30.3429		36	20	20	88.6	66.4	66.4	32.931	0	207.94	14528000000	62	P51881	P51881	ADP/ATP translocase 2;ADP/ATP translocase 2, N-terminally processed	Slc25a5
32.3541	31.4718	32.2517	32.5646	32.1481	31.4217	32.1371	32.4684		49	49	5	87.6	87.6	9.4	57.844	0	323.31	65067000000	219	P52480;A0A1L1SU37;A0A1L1SQV8;A0A1L1SSN6;A0A1L1STV8;A0A1L1SUV0;A0A1L1ST52;A0A1L1SVH2;E9Q509;G3X925;P53657	P52480	Pyruvate kinase PKM	Pkm
25.3961	NaN	NaN	NaN	25.9755	26.2587	25.2679	25.3912		4	4	4	50.9	50.9	50.9	13.02	0	51.072	657480000	6	P52503;A0A1Y7VM38;A0A1Y7VKP8	P52503;A0A1Y7VM38;A0A1Y7VKP8	NADH dehydrogenase [ubiquinone] iron-sulfur protein 6, mitochondrial	Ndufs6
25.3888	NaN	NaN	NaN	25.2422	25.7722	25.2785	26.0759		5	5	5	48.1	48.1	48.1	14.255	0	15.283	559740000	6	P52760	P52760	Ribonuclease UK114	Hrsp12
NaN	NaN	NaN	NaN	24.8085	24.7598	NaN	24.291		6	6	6	15.3	15.3	15.3	73.98	0	16.609	192470000	6	P52825;A2A8E7;A2A8E8	P52825	Carnitine O-palmitoyltransferase 2, mitochondrial	Cpt2
25.2101	NaN	NaN	NaN	25.354	24.9271	NaN	25.0195		6	6	6	16	16	16	53.246	0	11.488	417840000	6	P53395	P53395	Lipoamide acyltransferase component of branched-chain alpha-keto acid dehydrogenase complex, mitochondrial	Dbt
27.6523	NaN	27.405	NaN	27.8944	27.0146	26.9834	26.7375		9	9	9	44.3	44.3	44.3	23.547	0	48.443	1836800000	21	P53994;Q3TEG7;P59279;G3UXQ7;G3V022;A0A1D5RMH1;S4R232	P53994;Q3TEG7;P59279	Ras-related protein Rab-2A;Ras-related protein Rab-2B	Rab2a;Rab2b
31.3619	31.3717	30.3671	31.0136	30.7464	30.4111	29.6862	30.3221		33	33	33	73.2	73.2	73.2	50.906	0	321.36	25612000000	109	P54071;D6RIL6;A0A0U1RP68;A0A0U1RPR1	P54071	Isocitrate dehydrogenase [NADP], mitochondrial	Idh2
NaN	NaN	26.2194	NaN	25.6239	25.1993	25.3522	25.1486		5	5	5	19.4	19.4	19.4	31.375	0	14.675	578470000	13	P54116	P54116	Erythrocyte band 7 integral membrane protein	Stom
NaN	NaN	NaN	26.1707	25.0775	24.1941	25.0926	25.5619		3	3	3	6.5	6.5	6.5	43.512	0	5.6144	498160000	6	P54728	P54728	UV excision repair protein RAD23 homolog B	Rad23b
NaN	27.3908	27.2666	26.5985	26.4148	27.8908	27.9475	27.1473		13	13	13	44.7	44.7	44.7	54.191	0	149.1	2509800000	27	P54823	P54823	Probable ATP-dependent RNA helicase DDX6	Ddx6
27.3299	27.2609	27.5808	27.418	28.8104	29.5132	29.0561	29.0382		20	20	20	34.1	34.1	34.1	75.474	0	323.31	6503600000	53	P55096;A0A0G2JDI9;A0A0G2JGA4	P55096;A0A0G2JDI9	ATP-binding cassette sub-family D member 3	Abcd3
25.8962	NaN	NaN	26.9681	26.6054	25.0144	26.0435	26.1065		5	3	3	26.1	16.4	16.4	23.668	0	24.729	885210000	15	P55258	P55258	Ras-related protein Rab-8A	Rab8a
29.3676	30.2711	29.5785	29.0791	28.1127	29.2953	29.2229	28.3507		25	25	25	54.7	54.7	54.7	42.215	0	85.046	9746900000	78	P55302;F6WMD1	P55302	Alpha-2-macroglobulin receptor-associated protein	Lrpap1
28.0611	27.3318	26.5732	26.5232	27.1478	27.6933	26.5507	27.4365		2	2	2	36.5	36.5	36.5	5.8378	0	3.6249	2103200000	9	P56382	P56382	ATP synthase subunit epsilon, mitochondrial	Atp5e
29.2822	29.3816	27.9175	29.0779	28.2902	28.7499	27.6023	27.7985		10	10	10	79.1	79.1	79.1	10.071	0	113.48	6767700000	29	P56391;A0A140LIU3	P56391;A0A140LIU3	Cytochrome c oxidase subunit 6B1	Cox6b1
26.0199	NaN	NaN	25.8234	26.0526	26.5147	25.8091	26.0869		4	4	4	84.1	84.1	84.1	6.784	0	7.8075	859370000	5	P56394	P56394	Cytochrome c oxidase copper chaperone	Cox17
31.5878	32.2957	32.1062	31.5514	31.1797	30.9341	31.7405	31.379		15	15	15	94.8	94.8	94.8	15.241	0	180.97	44286000000	80	P56395;G5E850;E0CY88;A0A494B9D8	P56395;G5E850	Cytochrome b5	Cyb5a
26.7601	24.8514	26.1407	26.7842	27.0144	24.7631	25.1854	26.3066		4	4	4	10.3	10.3	10.3	93.354	0	56.765	819040000	14	Q3U4W8;P56399;D3Z4K7;D3YYA5	Q3U4W8;P56399;D3Z4K7	Ubiquitin carboxyl-terminal hydrolase;Ubiquitin carboxyl-terminal hydrolase 5	Usp5
33.1675	32.1747	31.7413	32.0598	33.9888	33.202	31.7807	33.0072		50	50	50	85.4	85.4	85.4	56.3	0	323.31	126610000000	330	P56480	P56480	ATP synthase subunit beta, mitochondrial	Atp5b
NaN	NaN	24.9587	25.2115	24.9239	NaN	24.3245	24.8741		1	1	1	16	16	16	10.505	0	19.908	209130000	4	Q91V77;P56565	Q91V77;P56565	Protein S100;Protein S100-A1	S100a1
NaN	NaN	NaN	NaN	23.5225	22.4175	23.5776	NaN		2	2	2	20.6	20.6	20.6	14.275	0.00052192	2.8137	76920000	3	P56812;D3Z7Q5	P56812;D3Z7Q5	Programmed cell death protein 5	Pdcd5
28.3563	28.6424	28.1802	28.8299	27.4389	28.2624	28.1035	28.0983		11	11	11	16.9	16.9	16.9	78.491	0	183.86	4827800000	33	P57716	P57716	Nicastrin	Ncstn
28.3977	28.4407	28.1851	28.6004	27.3328	27.0456	27.4868	27.5755		13	13	13	49.8	49.8	49.8	28.369	0	101.34	3604900000	43	P57746	P57746	V-type proton ATPase subunit D	Atp6v1d
29.6952	28.7686	29.6098	29.0387	29.8068	29.4628	29.6195	29.1506		18	18	18	63	63	63	28.823	0	257.32	11483000000	72	P57759;F8WJI4;F8WIM7;D6RG87	P57759	Endoplasmic reticulum resident protein 29	Erp29
32.27	31.1	32.0983	32.401	31.6416	30.9841	31.707	32.0339		75	75	46	78.6	78.6	59.3	104.98	0	323.31	47897000000	265	P57780;A0A1L1SV25;E9Q2W9;A0A1L1SVJ6;D3Z0L8;D3Z761;A0A1Y7VMW4	P57780;A0A1L1SV25;E9Q2W9	Alpha-actinin-4	Actn4
NaN	NaN	NaN	26.0111	26.605	26.7173	26.3422	26.1175		7	7	7	32.5	32.5	32.5	35.827	0	67.419	1061600000	15	P58137;Q8BZR4	P58137;Q8BZR4	Acyl-coenzyme A thioesterase 8	Acot8
31.2267	32.4642	31.8367	31.7172	30.6217	32.0068	31.309	31.0548		68	68	68	76.7	76.7	76.7	95.313	0	323.31	60004000000	276	P58252;G3UXK8;G3UZ34;A2AH85;O08810	P58252	Elongation factor 2	Eef2
NaN	NaN	25.6156	25.8404	25.7642	25.8277	26.139	25.9949		7	7	7	6.3	6.3	6.3	181.82	0	24.532	780290000	8	P58871;Z4YJL4;A0A571BEG9	P58871;Z4YJL4	182 kDa tankyrase-1-binding protein	Tnks1bp1
NaN	NaN	NaN	NaN	27.0037	26.3711	NaN	26.2077		5	5	5	21.4	21.4	21.4	46.719	0	36.166	712310000	6	P59017;A0A0N4SW24;A0A0N4SW63	P59017	Bcl-2-like protein 13	Bcl2l13
NaN	NaN	NaN	NaN	26.1414	26.4795	NaN	25.8833		5	5	5	34.6	34.6	34.6	24.251	0	17.429	793710000	4	P59024;D3YWB6;D6RDT0	P59024;D3YWB6	Peptidyl-prolyl cis-trans isomerase FKBP14	Fkbp14
28.4616	28.2383	27.966	28.7963	27.515	27.8378	28.1094	28.169		10	10	10	57.7	57.7	57.7	19.667	0	39.616	3987300000	36	P59999;Q3TX55;E9PWA7	P59999	Actin-related protein 2/3 complex subunit 4	Arpc4
27.5978	27.9371	27.8188	27.0091	27.7861	27.1852	26.8764	26.6472		5	5	5	48.5	48.5	48.5	7.7412	0	82.862	2510100000	17	P60060;G3UWH0	P60060	Protein transport protein Sec61 subunit gamma	Sec61g
25.2754	NaN	25.742	25.4009	NaN	24.7966	25.309	24.8895		4	4	4	12.1	12.1	12.1	52.22	0	15.215	504520000	6	P60229	P60229	Eukaryotic translation initiation factor 3 subunit E	Eif3e
26.7631	27.5609	27.5578	28.2873	27.7446	29.7197	28.3213	28.1179		16	16	14	74.4	74.4	72.2	37.497	0	323.31	5765200000	42	P60335	P60335	Poly(rC)-binding protein 1	Pcbp1
NaN	NaN	NaN	NaN	24.9129	25.5761	NaN	24.8669		2	2	2	24.1	24.1	24.1	8.1828	0	47.931	391680000	5	P60603	P60603	Reactive oxygen species modulator 1	Romo1
35.7101	34.4197	35.7475	35.7146	36.2647	35.5624	36.0421	36.6073		52	52	0	93.3	93.3	0	41.736	0	323.31	782460000000	540	P60710;E9Q1F2;G3UZ07;E9Q606;F8WGM8;E9Q2D1;F6WX90;V9GXQ2;E9Q3M9	P60710;E9Q1F2	Actin, cytoplasmic 1;Actin, cytoplasmic 1, N-terminally processed	Actb
28.6396	29.2421	28.3258	28.7739	27.9031	28.5204	29.3066	28.4456		12	11	11	62.8	57.1	57.1	21.258	0	91.82	5183800000	34	P60766;P60766-1;A0A2R8VH29;G3UZM2;D3Z3L1;F2Z463;D3YX61;Q9ER71-2;Q9ER71	P60766;P60766-1	Cell division control protein 42 homolog	Cdc42
28.3206	28.0686	27.3167	27.8655	29.0959	30.3121	30.3384	29.2415		23	23	14	68	68	48	46.153	0	323.31	11674000000	66	P60843	P60843	Eukaryotic initiation factor 4A-I	Eif4a1
28.476	30.4713	30.4665	29.4981	27.5241	29.832	29.9796	28.7373		8	8	8	54.6	54.6	54.6	13.373	0	25.861	12346000000	35	P60867	P60867	40S ribosomal protein S20	Rps20
26.3802	28.2726	26.1321	26.5797	25.6452	25.224	25.3597	25.6397		4	3	3	17.5	12	12	22.541	0	13.547	1065200000	13	P61027;Q3TYH2;Q8K386	P61027	Ras-related protein Rab-10	Rab10
NaN	NaN	NaN	NaN	25.4956	24.7555	NaN	25.7021		4	2	2	22.2	12.6	12.6	23.603	0	5.151	560450000	5	P61028	P61028	Ras-related protein Rab-8B	Rab8b
26.5963	NaN	NaN	NaN	26.1812	26.18	25.9682	26.6455		6	6	6	49.3	49.3	49.3	17.138	0	28.622	1170300000	10	P61089;A0A1W2P7Z3	P61089	Ubiquitin-conjugating enzyme E2 N	Ube2n
28.3943	26.4531	25.9948	29.1705	27.1624	28.5684	27.4103	28.4589		18	18	18	57.1	57.1	57.1	44.76	0	210.03	4337700000	44	P61161	P61161	Actin-related protein 2	Actr2
28.5286	27.9574	28.5011	28.3777	29.026	27.7871	28.2028	28.1749		13	13	5	35.4	35.4	17.8	42.613	0	122.88	4511500000	43	P61164;A0A494BB86	P61164;A0A494BB86	Alpha-centractin	Actr1a
28.0467	27.7584	28.3577	28.4455	28.1542	26.486	27.2852	27.6935		9	9	4	44.8	44.8	21.9	20.504	0	195.06	2918700000	29	P61226	P61226	Ras-related protein Rap-2b	Rap2b
28.5052	31.4237	29.9283	29.1833	28.2474	30.0444	30.0352	29.6197		20	20	20	75.2	75.2	75.2	17.258	0	80.888	15996000000	57	P61255;B1ARA5;B1ARA3	P61255;B1ARA5;B1ARA3	60S ribosomal protein L26	Rpl26
27.9171	28.0125	28.9829	27.697	28.1718	29.6882	30.2878	28.4766		10	10	10	53.7	53.7	53.7	15.798	0	25.046	10808000000	37	P61358;A2A4Q0	P61358	60S ribosomal protein L27	Rpl27
26.6508	26.7265	26.0577	26.7774	26.5505	25.4857	25.8435	26.0187		4	4	4	17.8	17.8	17.8	50.236	0	23.684	1035000000	6	P61922-2;P61922;Q3TUE8;F7C9G3	P61922-2;P61922	4-aminobutyrate aminotransferase, mitochondrial	Abat
29.7569	27.638	29.4038	29.501	29.5348	29.4469	29.7403	29.828		22	18	14	69.6	67.2	67.2	28.302	0	323.31	9364000000	57	P61982	P61982	14-3-3 protein gamma;14-3-3 protein gamma, N-terminally processed	Ywhag
26.3017	NaN	26.6231	NaN	24.2671	25.0306	25.7176	NaN		4	4	2	23.5	23.5	13.2	23.399	0	9.7816	476520000	9	P62071;A0A1B0GRT5;A0A1B0GRG1	P62071;A0A1B0GRT5;A0A1B0GRG1	Ras-related protein R-Ras2	Rras2
29.3103	30.4005	30.77	29.575	30.9263	31.3159	32.1686	31.2605		21	21	21	76.8	76.8	76.8	22.127	0	323.31	31244000000	79	P62082	P62082	40S ribosomal protein S7	Rps7
26.3781	26.2218	26.4787	26.8723	25.9489	25.6307	26.4531	26.4467		13	5	3	39.4	17	9.1	37.54	0	15.611	1094900000	18	P62137	P62137	Serine/threonine-protein phosphatase PP1-alpha catalytic subunit	Ppp1ca
29.4252	28.2831	29.7248	30.1066	28.8312	28.3937	28.6659	29.2057		14	14	5	43.4	43.4	17.4	37.186	0	323.31	7279700000	52	P62141;A0A0J9YUU8;A0A0J9YUG2	P62141	Serine/threonine-protein phosphatase PP1-beta catalytic subunit	Ppp1cb
NaN	NaN	NaN	NaN	25.4406	23.6189	NaN	25.0051		3	3	3	10.9	10.9	10.9	49.184	0	6.0679	252470000	3	P62192	P62192	26S protease regulatory subunit 4	Psmc1
27.7189	31.3047	29.1079	28.9258	28.7152	30.7927	30.7031	29.6192		20	20	20	63.9	63.9	63.9	24.205	0	112.42	20827000000	70	P62242	P62242	40S ribosomal protein S8	Rps8
28.5358	29.1465	29.9615	28.976	28.0144	29.8713	29.5133	28.9143		15	15	15	81.5	81.5	81.5	14.839	0	95.94	11018000000	55	P62245;F8WJ41;D3Z712;D3YVB4	P62245;F8WJ41;D3Z712;D3YVB4	40S ribosomal protein S15a	Rps15a
30.4382	28.0268	30.286	30.3036	30.4774	29.519	30.3104	30.6257		22	19	19	67.1	67.1	67.1	29.174	0	298.83	15947000000	89	P62259;D6REF3;F6WA09	P62259;D6REF3;F6WA09	14-3-3 protein epsilon	Ywhae
25.0249	29.6818	29.3238	28.079	27.3109	30.5158	29.7612	27.7082		11	11	11	47	47	47	16.273	0	98.409	11332000000	42	P62264;D3YVF4;D3Z7I1	P62264;D3YVF4;D3Z7I1	40S ribosomal protein S14	Rps14
25.9085	29.6016	29.3279	26.8826	27.8154	30.0215	30.0695	27.9071		13	13	13	52.4	52.4	52.4	15.807	0	259.93	9497900000	49	P62267	P62267	40S ribosomal protein S23	Rps23
28.5795	31.3566	29.9646	30.051	27.8748	30.3227	30.1891	29.1627		19	19	19	67.1	67.1	67.1	17.718	0	71.484	16864000000	59	P62270;F6YVP7;S4R1N6;A0A1Y7VKY1;A0A3Q4EGP3	P62270;F6YVP7;S4R1N6;A0A1Y7VKY1	40S ribosomal protein S18	Rps18;Gm10260
26.0882	NaN	26.9895	26.0825	24.4095	28.4923	28.2983	26.3031		4	4	4	35.7	35.7	35.7	6.6767	0	10.262	2955800000	13	P62274	P62274	40S ribosomal protein S29	Rps29
28.7098	30.8853	30.8526	29.6031	28.2698	30.6614	30.8775	29.6889		25	25	25	79.7	79.7	79.7	18.431	0	131.34	20367000000	69	P62281;A0A1B0GRR3;A0A1B0GSE8	P62281;A0A1B0GRR3;A0A1B0GSE8	40S ribosomal protein S11	Rps11
28.2744	30.22	30.6396	28.8917	28.7284	30.9798	30.9888	30.0941		20	20	20	76.8	76.8	76.8	17.222	0	85.57	19822000000	65	P62301;Q921R2;A0A0U1RQ71	P62301;Q921R2	40S ribosomal protein S13	Rps13
24.0751	NaN	NaN	24.1612	24.0561	24.4637	23.838	23.6865		2	2	2	26.1	26.1	26.1	13.281	0	7.3685	239260000	5	P62315;A0A3Q4L381;A0A3Q4L2W0	P62315;A0A3Q4L381;A0A3Q4L2W0	Small nuclear ribonucleoprotein Sm D1	Snrpd1
27.4094	26.8411	27.2363	27.3545	27.035	25.9068	26.8136	26.8778		8	8	8	89.6	89.6	89.6	10.99	0	29.793	1611300000	19	P62627;A2AVR9	P62627;A2AVR9	Dynein light chain roadblock-type 1	Dynlrb1
29.3206	31.4641	31.0739	29.888	28.8255	31.5303	31.2123	30.3491		38	38	38	88.2	88.2	88.2	29.597	0	323.31	29619000000	130	P62702;V9GWY0	P62702	40S ribosomal protein S4, X isoform	Rps4x
29.8453	30.9117	30.4922	29.7839	29.3283	30.4717	30.0704	29.333		23	23	23	79	79	79	20.732	0	112.51	18284000000	74	P62717;A0A1D5RLW5;A0A1D5RM85;A0A1D5RME4;A0A1D5RM79;A0A1D5RMC7	P62717;A0A1D5RLW5;A0A1D5RM85;A0A1D5RME4	60S ribosomal protein L18a	Rpl18a
26.4227	NaN	NaN	NaN	27.0166	26.6514	26.6167	NaN		36	2	2	82.5	7.7	7.7	42.009	0	12.553	960030000	5	P62737;P63268;A0A494B9T3;D3YZY0;D3Z2K3;A0A0U1RQ96	P62737;P63268;A0A494B9T3;D3YZY0	Actin, aortic smooth muscle;Actin, gamma-enteric smooth muscle	Acta2;Actg2
NaN	NaN	NaN	NaN	23.9316	23.5189	23.9026	NaN		3	2	2	18.4	13.8	13.8	22.123	0	4.0311	96974000	2	P62746	P62746	Rho-related GTP-binding protein RhoB	Rhob
28.6262	28.3049	29.9523	29.4919	29.4008	30.4791	30.609	29.8867		12	12	12	59	59	59	17.695	0	62.308	14318000000	47	P62751	P62751	60S ribosomal protein L23a	Rpl23a
27.7432	31.3313	30.2421	28.9688	27.9594	30.2799	30.1352	28.9246		22	22	22	61.8	61.8	61.8	28.68	0	225.76	16780000000	68	P62754	P62754	40S ribosomal protein S6	Rps6
28.862	28.5879	29.1661	NaN	30.0299	30.9361	30.285	27.7456		12	12	12	59.2	59.2	59.2	11.367	0	68.154	15663000000	39	P62806	P62806	Histone H4	Hist1h4a
30.3441	28.502	30.1709	30.0865	31.4392	30.7341	31.1821	31.4955		39	39	39	80.8	80.8	80.8	56.55	0	323.31	26577000000	169	P62814;Q91YH6;A0A0U1RNU9	P62814	V-type proton ATPase subunit B, brain isoform	Atp6v1b2
28.1782	27.7866	26.075	27.1701	27.4669	27.0308	27.5759	28.0846		12	12	12	57.4	57.4	57.4	24.423	0	25.164	2750100000	29	P62827;Q14AA6;Q61820	P62827;Q14AA6	GTP-binding nuclear protein Ran	Ran;1700009N14Rik
26.9698	30.307	27.4775	26.932	28.2489	30.0875	30.4933	29.3791		13	13	13	58.6	58.6	58.6	14.865	0	135.59	12571000000	38	P62830;A2A6F8	P62830	60S ribosomal protein L23	Rpl23
NaN	29.3752	26.8965	26.8917	25.1122	28.0249	27.0127	26.6572		5	5	5	58.6	58.6	58.6	17.04	0	58.217	3424700000	14	P62843;D3YTQ9	P62843;D3YTQ9	40S ribosomal protein S15	Rps15
26.5041	28.8699	28.8852	28.1012	26.894	28.0857	27.7044	26.7095		9	9	9	52.3	52.3	52.3	15.069	0	42.857	5201100000	23	P62849-2;P62849-3;P62849;A0A286YEB7	P62849-2;P62849-3;P62849;A0A286YEB7	40S ribosomal protein S24	Rps24
NaN	NaN	25.6067	NaN	27.95	30.4465	30.0772	28.3495		8	8	8	47.8	47.8	47.8	13.015	0	251.4	8545200000	36	P62855	P62855	40S ribosomal protein S26	Rps26
29.3932	28.4365	29.3244	29.5303	31.5902	30.8318	31.1531	31.7369		29	29	18	70.3	70.3	58.8	37.377	0	323.31	25663000000	109	P62874;H3BKR2;H3BLF7	P62874;H3BKR2	Guanine nucleotide-binding protein G(I)/G(S)/G(T) subunit beta-1	Gnb1
29.1819	26.013	28.5519	28.2955	30.0724	29.3955	30.3779	30.426		25	15	11	67.6	46.5	37.6	37.331	0	323.31	11594000000	65	P62880;E9QKR0;D3YZX3;D3Z1M1;D3Z1T4;E9PWM7	P62880;E9QKR0;D3YZX3;D3Z1M1;D3Z1T4;E9PWM7	Guanine nucleotide-binding protein G(I)/G(S)/G(T) subunit beta-2	Gnb2
29.0798	28.822	29.1288	29.0035	29.2872	30.6787	30.2647	29.5153		16	16	16	73.9	73.9	73.9	12.784	0	171.66	15496000000	54	P62889;A0A2I3BQF4	P62889;A0A2I3BQF4	60S ribosomal protein L30	Rpl30
NaN	NaN	27.6913	NaN	25.8433	27.9212	27.3714	26.626		1	1	1	19.6	19.6	19.6	6.4066	0	3.0759	1728200000	7	P62892	P62892	60S ribosomal protein L39	Rpl39
28.422	27.9928	29.4132	26.0728	28.9549	30.3086	29.9005	29.1177		14	14	14	67.2	67.2	67.2	14.463	0	48.619	10641000000	40	P62900;A0A0A6YX26;A0A0A6YXL3	P62900;A0A0A6YX26;A0A0A6YXL3	60S ribosomal protein L31	Rpl31
28.0715	31.5413	30.5549	29.9262	27.9958	31.3638	30.6304	29.965		36	36	36	85.2	85.2	85.2	26.674	0	256.68	27877000000	108	P62908;D3YV43;A0A140LI77	P62908;D3YV43;A0A140LI77	40S ribosomal protein S3	Rps3
28.1089	NaN	28.5452	27.4281	28.0532	30.3666	29.3116	28.6763		10	10	10	69.6	69.6	69.6	15.86	0	36.579	9495400000	38	P62911;P17932	P62911	60S ribosomal protein L32	Rpl32
29.6962	30.2651	30.4726	29.7299	29.6091	31.2077	31.0121	30.4025		20	20	20	61.9	61.9	61.9	28.024	0	110.24	23062000000	60	P62918	P62918	60S ribosomal protein L8	Rpl8
28.4623	NaN	26.7149	26.9311	28.6031	28.2953	28.4849	28.4207		11	11	11	92.1	92.1	92.1	14.957	0	142.26	3932700000	36	P62962;Q5SX49;CON__P02584;J3QMC2	P62962;Q5SX49	Profilin-1;Profilin	Pfn1
31.8386	32.2209	32.0921	32.3541	31.2347	31.7443	32.1307	31.8543		18	18	5	74.4	74.4	32.1	17.951	0	133.07	53821000000	158	P62983	P62983	Ubiquitin-40S ribosomal protein S27a;Ubiquitin;40S ribosomal protein S27a	Rps27a
29.9589	30.2158	30.0227	30.685	29.1108	29.0318	29.3043	29.957		13	13	12	65.1	65.1	59.4	21.45	0	114.84	12190000000	55	P63001;Q3TLP8;P60764;A2AC13;Q05144;A0A2R8VHH0	P63001;Q3TLP8;P60764;A2AC13	Ras-related C3 botulinum toxin substrate 1;Ras-related C3 botulinum toxin substrate 3	Rac1;Rac3
27.3488	26.7823	26.83	27.3179	26.4052	25.4599	26.0741	26.5429		8	8	8	25.6	25.6	25.6	46.67	0	25.374	1394200000	14	P63005;P63005-2	P63005;P63005-2	Platelet-activating factor acetylhydrolase IB subunit alpha	Pafah1b1
32.2379	31.3913	32.5098	31.8459	31.8603	31.8565	32.4149	31.8713		65	63	58	75.9	75.9	73.8	70.87	0	323.31	63673000000	264	P63017;Q504P4;P17156;D3Z5E2;P16627	P63017;Q504P4	Heat shock cognate 71 kDa protein	Hspa8
27.5129	26.9902	28.2888	27.969	26.8355	26.6003	27.8466	27.0119		4	4	4	22.7	22.7	22.7	19.462	0	44.654	2078200000	13	P63028;D3YU75	P63028	Translationally-controlled tumor protein	Tpt1
32.2246	31.8395	31.3741	31.8022	31.9115	32.1398	31.1499	31.3569		60	60	60	78.9	78.9	78.9	60.955	0	323.31	61556000000	283	P63038;P63038-2;D3Z2F2;D3Z7J9	P63038	60 kDa heat shock protein, mitochondrial	Hspd1
26.0116	NaN	25.3173	26.0767	25.587	25.5493	25.7864	26.3874		8	8	7	23.5	23.5	20.1	41.275	0	27.749	797400000	16	P63085;A0A338P781;A0A338P736;D3Z6D8	P63085	Mitogen-activated protein kinase 1	Mapk1
27.9931	28.4307	28.8354	29.5507	28.7265	26.7502	28.3767	28.1888		14	12	12	37.5	33.2	33.2	44.178	0	40.163	4546300000	28	Z4YKV1;P63094-2;P63094;Q6R0H7-4;Q6R0H7;A0A571BEI3;P63094-3;A0A571BEM2;Q66L47;Q8CGK7;A0A571BEG2;A0A571BE25	Z4YKV1;P63094-2;P63094;Q6R0H7-4;Q6R0H7;A0A571BEI3;P63094-3;A0A571BEM2	Guanine nucleotide-binding protein G(s) subunit alpha isoforms short;Guanine nucleotide-binding protein G(s) subunit alpha isoforms XLas	Gnas
30.2492	27.5321	30.0401	29.2122	31.4702	30.8364	31.1751	31.8364		24	24	18	67.8	67.8	61.6	27.771	0	323.31	23888000000	94	P63101;A0A2I3BQ03;D3YXN6;D3YXF4;D3YW45	P63101;A0A2I3BQ03;D3YXN6	14-3-3 protein zeta/delta	Ywhaz
27.6904	27.5381	29.8093	29.019	28.0277	29.5774	29.442	29.1486		15	15	15	87	87	87	16.832	0	323.31	8261900000	47	P63242;A0A0A0MQM0;Q8BGY2;J3QPS8	P63242;A0A0A0MQM0;Q8BGY2	Eukaryotic translation initiation factor 5A-1;Eukaryotic translation initiation factor 5A;Eukaryotic translation initiation factor 5A-2	Eif5a;Eif5a2
25.913	30.2323	30.0145	29.3807	26.919	30.1109	29.4517	28.0393		17	17	17	68.1	68.1	68.1	15.524	0	323.31	12022000000	57	P63276	P63276	40S ribosomal protein S17	Rps17
NaN	NaN	27.1923	26.5046	27.0974	29.8327	29.1084	27.8912		14	14	14	66.1	66.1	66.1	18.916	0	84.492	5647300000	38	P63325;A0A338P731;Q3UW83;A0A338P7K4;A0A3B2W864	P63325;A0A338P731;Q3UW83;A0A338P7K4;A0A3B2W864	40S ribosomal protein S10	Rps10
30.583	29.0677	29.0719	29.1471	29.9712	29.5833	28.5892	29.2943		21	21	21	76.5	76.5	76.5	29.82	0	274.59	10838000000	65	P67778;Q5SQG5	P67778;Q5SQG5	Prohibitin	Phb
27.3944	NaN	29.3735	NaN	28.0985	30.0648	29.8575	28.8827		8	8	8	52.3	52.3	52.3	14.759	0	219.96	9829300000	36	P67984	P67984	60S ribosomal protein L22	Rpl22
29.5778	27.5605	29.0432	28.5988	33.2114	31.9638	31.4317	32.1154		37	14	2	82.5	49.3	8.8	42.019	0	289.62	45133000000	67	P68033;P68134;A0A1D5RM20	P68033;P68134	Actin, alpha cardiac muscle 1;Actin, alpha skeletal muscle	Actc1;Acta1
28.0961	29.2208	30.63	28.1665	28.0628	31.2479	30.1565	29.3133		29	29	29	80.4	80.4	80.4	35.076	0	323.31	18501000000	62	P68040	P68040	Guanine nucleotide-binding protein subunit beta-2-like 1;Guanine nucleotide-binding protein subunit beta-2-like 1, N-terminally processed	Gnb2l1
27.2686	NaN	28.1927	28.017	28.8781	28.4001	28.6665	28.7727		17	12	12	61.7	58	58	27.7	0	169.22	4387300000	37	P68254-2;P68254	P68254-2;P68254	14-3-3 protein theta	Ywhaq
31.2095	28.8964	30.1683	30.0594	31.9686	30.4446	30.6967	31.3808		30	30	1	73.6	73.6	3.1	50.135	0	323.31	25338000000	127	P68369;P05214	P68369;P05214	Tubulin alpha-1A chain;Tubulin alpha-3 chain	Tuba1a;Tuba3a
28.606	26.9733	28.0383	29.1731	28.4587	28.0197	28.1508	28.7276		30	7	6	83.1	20.7	17.3	49.83	0	88.91	4737400000	27	P68372;Q9D6F9;G3UZR1;CON__ENSEMBL:ENSBTAP00000025008;A2AQ07	P68372;Q9D6F9	Tubulin beta-4B chain;Tubulin beta-4A chain	Tubb4b;Tubb4a
28.4342	28.8811	27.3818	30.0422	29.1445	29.1068	29.3265	30.3145		20	14	14	54.1	49.2	49.2	28.211	0	140.33	9011400000	31	P68510	P68510	14-3-3 protein eta	Ywhah
24.9388	NaN	25.5467	25.7701	25.2372	25.5265	25.7309	25.7594		5	5	5	24.8	24.8	24.8	28.78	0	12.802	645720000	12	P70122;D6REV5;F6TN03	P70122	Ribosome maturation protein SBDS	Sbds
26.7881	NaN	26.6574	26.5096	28.3151	26.5766	27.3576	27.0704		9	9	9	13.9	13.9	13.9	97.183	0	56.603	1813500000	22	P70168	P70168	Importin subunit beta-1	Kpnb1
NaN	NaN	NaN	NaN	25.1943	24.8169	NaN	25.4921		6	6	6	4.4	4.4	4.4	211.1	0	8.9236	387200000	6	P70206	P70206	Plexin-A1	Plxna1
NaN	NaN	26.2134	NaN	26.0113	26.4258	26.7676	26.0875		4	4	4	11.8	11.8	11.8	49.35	0	72.18	1021500000	12	Q3U3K9;P70295;A0A0N4SVA6	Q3U3K9;P70295;A0A0N4SVA6	Ancient ubiquitous protein 1	Aup1
26.5848	NaN	25.3588	27.2971	27.98	26.7366	28.2783	28.2937		9	9	9	79.1	79.1	79.1	20.83	0	91.162	2197400000	19	P70296;D3Z1V4;D6RHS6	P70296;D3Z1V4	Phosphatidylethanolamine-binding protein 1;Hippocampal cholinergic neurostimulating peptide	Pebp1
NaN	NaN	NaN	25.6134	25.3156	25.8088	25.4872	25.3102		7	7	7	11.7	11.7	11.7	77.566	0	30.727	742950000	10	P70302;A0A1B0GR78;A0A1B0GRA5	P70302;A0A1B0GR78;A0A1B0GRA5	Stromal interaction molecule 1	Stim1
NaN	NaN	NaN	NaN	25.7658	NaN	25.4509	26.496		1	1	1	19	19	19	13.777	0	7.1671	368340000	4	P70349	P70349	Histidine triad nucleotide-binding protein 1	Hint1
27.4054	26.7516	27.3506	28.0368	27.0701	26.1873	27.3943	27.3658		5	5	5	14.6	14.6	14.6	38.6	0	17.279	1913900000	10	P70441	P70441	Na(+)/H(+) exchange regulatory cofactor NHE-RF1	Slc9a3r1
NaN	NaN	NaN	NaN	25.1853	24.7945	NaN	25.4236		4	4	4	14.1	14.1	14.1	39.666	0	4.816	263720000	4	P70460	P70460	Vasodilator-stimulated phosphoprotein	Vasp
NaN	NaN	NaN	26.6939	26.4531	27.8677	27.7528	26.8803		8	8	8	40	40	40	23.384	0	74.69	2365600000	16	Q60817;P70670	Q60817;P70670	Nascent polypeptide-associated complex subunit alpha;Nascent polypeptide-associated complex subunit alpha, muscle-specific form	Naca
27.2008	27.4006	26.6162	26.7537	28.749	28.952	27.9031	28.5735		17	17	17	25.3	25.3	25.3	106.25	0	128.88	4255300000	36	P70699;A2AFL5;A2AFL3;F6R5R5;F6VEG4	P70699	Lysosomal alpha-glucosidase	Gaa
27.6805	27.0261	27.4817	29.1615	28.1511	28.3173	28.2445	30.119		20	20	20	49.6	49.6	49.6	59.652	0	256.55	5606400000	49	P80313;A0A0N4SV00;A0A0N4SV22	P80313;A0A0N4SV00	T-complex protein 1 subunit eta	Cct7
26.2883	NaN	26.3149	25.9473	29.5727	28.3261	28.9381	30.2573		27	27	27	67.5	67.5	67.5	57.477	0	276.92	5577900000	56	P80314;A0A1W2P7B7;A0A1W2P6Q3;A0A1W2P828;A0A1W2P871;A0A1W2P8B6	P80314;A0A1W2P7B7	T-complex protein 1 subunit beta	Cct2
27.1115	27.8924	NaN	28.0609	28.7669	27.9637	28.4091	29.1783		20	20	20	50.8	50.8	50.8	58.066	0	208.79	4188200000	45	P80315;G5E839;G3UYW5	P80315;G5E839	T-complex protein 1 subunit delta	Cct4
27.6669	26.6126	27.0065	28.6725	27.7894	26.9858	27.0921	28.8463		15	15	15	35.7	35.7	35.7	59.623	0	128.4	2913600000	41	P80316;E0CZA1	P80316	T-complex protein 1 subunit epsilon	Cct5
27.4015	26.5048	27.5035	29.0984	29.783	28.5921	28.7393	30.0046		21	21	21	45.8	45.8	45.8	58.076	0	227.21	6450500000	59	Q52KG9;P80317;Q61390;B1AT05	Q52KG9;P80317	T-complex protein 1 subunit zeta	Cct6a
27.3976	26.1014	27.0858	27.8721	28.8024	28.16	27.4488	29.5159		18	18	18	45.1	45.1	45.1	60.629	0	91.285	4066700000	44	P80318;E9Q133;Q3U0I3;F6Q609;F6ZVG8	P80318;E9Q133;Q3U0I3;F6Q609	T-complex protein 1 subunit gamma	Cct3
NaN	NaN	25.5467	NaN	24.8762	24.9765	25.3396	NaN		5	5	5	18.6	18.6	18.6	50.304	0	9.6768	367850000	5	P81117;Q3UKN6	P81117;Q3UKN6	Nucleobindin-2;Nesfatin-1	Nucb2
27.3163	26.669	27.7636	27.7437	28.2654	27.9589	28.1102	27.5257		16	16	16	47.3	47.3	47.3	49.389	0	80.239	3147200000	29	Q3TWV4;P84091;A0A338P6T4	Q3TWV4;P84091	AP-2 complex subunit mu	Ap2m1
26.9545	27.8771	27.4633	27.9991	27.4061	26.896	26.954	27.2818		9	8	8	59.2	53.4	53.4	21.308	0	50.797	2410000000	21	P84096;A0A1B0GSL4	P84096	Rho-related GTP-binding protein RhoG	Rhog
NaN	NaN	24.2139	NaN	23.5225	25.818	24.7528	24.5004		2	2	2	35.6	35.6	35.6	6.8998	0	3.6351	370330000	3	P84102;A2ARQ2;B2KF73;D6RCY2;D6RIP7;A2ARQ4;O88892	P84102;A2ARQ2;B2KF73;D6RCY2;D6RIP7;A2ARQ4;O88892	Small EDRK-rich factor 2;Small EDRK-rich factor 1	Serf2;Serf1
NaN	25.3643	25.5968	NaN	25.4044	26.676	25.8203	25.2233		3	3	2	28.2	28.2	28.2	14.203	0	4.2444	761310000	7	P84104-2;P84104	P84104-2;P84104	Serine/arginine-rich splicing factor 3	Srsf3
28.2304	28.4231	29.4315	30.041	28.0046	29.5949	29.4924	30.5337		9	9	9	59.6	59.6	59.6	20.583	0	68.189	11504000000	44	P97315	P97315	Cysteine and glycine-rich protein 1	Csrp1
29.2919	30.7769	31.4647	30.5019	29.2579	31.4411	31.3495	29.9521		35	35	35	73.5	73.5	73.5	29.885	0	290.01	28931000000	107	P97351	P97351	40S ribosomal protein S3a	Rps3a
27.5118	26.151	27.017	26.925	27.0509	27.4413	27.4184	26.727		17	17	17	40.7	40.7	40.7	62.981	0	141.74	2097400000	33	P97363	P97363	Serine palmitoyltransferase 2	Sptlc2
28.649	27.1351	28.7645	28.8434	29.6435	29.1744	29.2294	30.1487		11	11	11	38.1	38.1	38.1	31.775	0	102.64	8618600000	41	P97370	P97370	Sodium/potassium-transporting ATPase subunit beta-3	Atp1b3
26.6688	27.0027	26.9156	27.2514	26.428	26.7299	26.5878	26.8561		8	8	6	35.9	35.9	29.5	33.887	0	32.031	1627600000	15	P97377-2;P97377;Q80YP0;E9Q9E4;A0A0G2JDL3;E9PZX7;E3W997;E9PVC7;A0A1L1SUS7;A0A1Y7VLM0;Q80YP0-2;Q99J95-3;P49615;P30285;Q99J95-2;Q64261;O35495-3;Q99J95;O35495-2;Q8K0D0-2;Q3V3A1-3;Q3V3A1;Q04899;Q04735-2;O35495;Q04735;Q8K0D0;Q14AX6-2;Q69ZA1-2;Q14AX6-3;Q14AX6;Q69ZA1	P97377-2;P97377	Cyclin-dependent kinase 2	Cdk2
25.8989	29.2647	26.2286	26.6067	25.3291	27.7778	27.5811	26.4258		16	16	14	46.1	46.1	42.5	50.784	0	119.87	3201300000	24	P97379-2;P97379;A0A0J9YTQ8;A0A0J9YUY8	P97379-2;P97379;A0A0J9YTQ8	Ras GTPase-activating protein-binding protein 2	G3bp2
25.898	25.7361	26.2084	25.8628	25.7367	25.0611	25.9893	26.2158		6	6	6	14.1	14.1	14.1	54.079	0	27.336	788850000	11	P97384;D3Z7U0	P97384;D3Z7U0	Annexin A11;Annexin	Anxa11
25.1372	NaN	NaN	25.1964	25.2823	26.0236	26.0161	25.054		9	9	9	17.2	17.2	17.2	65.052	0	16.592	610240000	12	P97390	P97390	Vacuolar protein sorting-associated protein 45	Vps45
28.3787	29.4678	28.107	28.8573	27.6043	27.8364	27.0986	27.8553		5	5	5	44.4	44.4	44.4	12.496	0	29.51	3975600000	21	P97450;E9QAD6	P97450;E9QAD6	ATP synthase-coupling factor 6, mitochondrial	Atp5j
27.2709	27.415	27.5225	27.9522	27.3619	27.9113	28.1006	28.2839		31	31	31	17.9	17.9	17.9	251.09	0	88.929	3371300000	51	P97479-2;P97479;A0A0R4J113;Q5MJ56;A0A0U1RPX7;D3YUT5;A0A571BE72;A0A571BEN3;A0A0U1RPT3	P97479-2;P97479;A0A0R4J113;Q5MJ56;A0A0U1RPX7	Unconventional myosin-VIIa	Myo7a
NaN	NaN	NaN	NaN	26.2268	25.7649	NaN	25.6677		3	3	3	7.6	7.6	7.6	88.25	0	8.5239	441960000	3	P97742;A0A494BAD3	P97742	Carnitine O-palmitoyltransferase 1, liver isoform	Cpt1a
26.4035	NaN	NaN	NaN	28.5781	28.4719	27.0762	27.6308		12	12	12	48.6	48.6	48.6	50.052	0	258.92	3016400000	24	P97807-2;P97807;H3BKG7	P97807-2;P97807	Fumarate hydratase, mitochondrial	Fh
NaN	25.8473	27.0794	25.4441	25.4388	28.3102	27.6166	26.2642		12	10	10	32.3	28.8	28.8	51.828	0	46.752	2212900000	17	P97855	P97855	Ras GTPase-activating protein-binding protein 1	G3bp1
31.9064	30.8323	31.5307	32.0552	32.1731	31.2726	31.2643	31.788		30	30	6	82.9	82.9	17.1	49.67	0	323.31	45968000000	204	P99024;A0A1D5RM76	P99024	Tubulin beta-5 chain	Tubb5
28.202	28.3634	NaN	28.2553	29.4179	29.6898	29.2604	29.1839		12	12	12	78.3	78.3	78.3	11.651	0	91.668	8306600000	35	P99027;A0A5F8MPY2	P99027;A0A5F8MPY2	60S acidic ribosomal protein P2	Rplp2
27.8931	NaN	NaN	NaN	27.1142	27.5196	26.5179	26.5545		2	2	2	32.6	32.6	32.6	10.435	0	24.437	1748800000	7	P99028	P99028	Cytochrome b-c1 complex subunit 6, mitochondrial	Uqcrh
28.131	26.6165	27.7761	26.9268	28.0239	28.3285	27.7237	27.7371		14	14	14	63.6	63.6	63.6	17.015	0	130.16	3314200000	30	P99029-2;G3UZJ4;P99029;H3BJQ7;A0A494BAZ4	P99029-2;G3UZJ4;P99029;H3BJQ7;A0A494BAZ4	Peroxiredoxin-5, mitochondrial	Prdx5
26.3116	NaN	26.4749	26.3644	26.3102	26.209	26.2569	26.6688		10	10	10	25.8	25.8	25.8	53.255	0	28.984	1125400000	17	Q00493	Q00493	Carboxypeptidase E	Cpe
26.4853	NaN	NaN	25.7525	26.3197	25.5695	26.0351	26.5462		6	6	6	15.5	15.5	15.5	59.262	0	11.315	802640000	10	Q00612;A3KG36	Q00612;A3KG36	Glucose-6-phosphate 1-dehydrogenase X;Glucose-6-phosphate 1-dehydrogenase	G6pdx
31.2229	30.8318	31.6742	31.1322	30.574	30.0689	30.8572	30.5494		50	50	49	66.9	66.9	64.5	89.321	0	323.31	27628000000	176	Q01853	Q01853	Transitional endoplasmic reticulum ATPase	Vcp
NaN	NaN	NaN	25.9402	27.5629	25.8919	27.4032	26.8045		11	11	11	15.4	15.4	15.4	117.81	0	77.118	1195900000	18	Q02053;P31254	Q02053	Ubiquitin-like modifier-activating enzyme 1	Uba1
27.5522	26.8863	27.2094	28.4442	27.4684	26.7	27.3214	27.7387		12	12	12	23.6	23.6	23.6	85.47	0	175.31	2490300000	40	Q02248;E9Q6A9;D3YUH4;F7BAC9;F7CRC6;D3Z7S6;D3Z5Q1;E9PW26;F6QZ47;Q02257	Q02248;E9Q6A9	Catenin beta-1	Ctnnb1
27.2935	29.435	28.6347	27.0959	28.0483	29.8343	29.0863	27.7041		25	25	25	52.7	52.7	52.7	53.408	0	189.96	7340800000	54	Q02819;A0A1C7CYU3;A0A1B0GR41;A0A1B0GR92;A0A1B0GS16;A0A1B0GT83	Q02819;A0A1C7CYU3;A0A1B0GR41	Nucleobindin-1	Nucb1
33.1052	33.5288	32.0343	32.7997	32.589	32.6391	31.8377	32.4293		65	65	65	77.6	77.6	77.6	59.752	0	323.31	101030000000	304	Q03265;D3Z6F5;D6RJ16	Q03265;D3Z6F5	ATP synthase subunit alpha, mitochondrial;ATP synthase subunit alpha	Atp5a1
27.4679	25.9104	26.7071	27.5608	27.216	26.428	27.0536	27.3704		9	9	9	36.2	36.2	36.2	42.713	0	50.791	1784200000	25	Q04447	Q04447	Creatine kinase B-type	Ckb
27.943	27.8119	27.374	NaN	27.9346	27.5978	27.2967	26.8974		13	13	13	44	44	44	38.113	0	89.034	2718900000	24	Q05186	Q05186	Reticulocalbin-1	Rcn1
NaN	NaN	NaN	NaN	24.8383	24.1697	24.937	NaN		3	3	3	12	12	12	39.842	0	4.1152	205530000	5	Q06138;D3Z704;D3YV52	Q06138	Calcium-binding protein 39	Cab39
28.8147	29.2869	26.8931	28.6995	28.488	29.2074	27.3852	28.1471		10	10	10	73.2	73.2	73.2	8.2355	0	49.716	6001200000	38	Q06185;Q8BTB6	Q06185;Q8BTB6	ATP synthase subunit e, mitochondrial	Atp5i;Atp5k
28.5245	28.0324	27.1339	26.0073	27.2896	27.4111	26.8126	25.6845		21	21	21	10.8	10.8	10.8	273.81	0	66.213	2461000000	28	Q07113	Q07113	Cation-independent mannose-6-phosphate receptor	Igf2r
26.0556	26.1251	NaN	NaN	29.2955	29.2761	27.6887	28.7609		13	13	13	41	41	41	44.889	0	191.41	5179600000	39	Q07417	Q07417	Short-chain specific acyl-CoA dehydrogenase, mitochondrial	Acads
25.3526	NaN	25.6619	NaN	25.4294	26.6713	25.3356	NaN		6	6	6	33	33	33	33.355	0	71.947	758310000	6	Q08091;A0A1L1SUB2;A0A1L1SRV0;Q08091-2;A0A1L1SRL1	Q08091;A0A1L1SUB2;A0A1L1SRV0;Q08091-2;A0A1L1SRL1	Calponin-1	Cnn1
28.2207	28.391	28.2439	28.5596	27.7077	27.4521	26.9873	27.2645		15	14	14	56.7	56.7	56.7	33.155	0	97.172	3591200000	33	Q08093;D3Z7R6	Q08093;D3Z7R6	Calponin-2;Calponin	Cnn2
28.9042	28.7204	29.1951	29.3104	28.7363	29.0069	29.59	29.609		30	30	12	43.2	43.2	22.5	91.736	0	233.85	8577500000	67	Q08509;D3Z5I5;D3Z7F4	Q08509	Epidermal growth factor receptor kinase substrate 8	Eps8
28.1473	29.9452	27.4172	29.4006	27.0601	28.3313	28.5303	28.4908		6	6	6	44.2	44.2	44.2	12.817	0	28.705	5994600000	26	Q2TA50;A0A494BBN3	Q2TA50		Mlana
NaN	NaN	24.5284	NaN	25.302	24.999	25.4583	24.8933		3	3	3	9.8	9.8	9.8	54.257	0	8.3336	375460000	7	Q2TBE6;A0A494BBQ4	Q2TBE6;A0A494BBQ4	Phosphatidylinositol 4-kinase type 2-alpha	Pi4k2a
25.3606	NaN	NaN	NaN	25.4072	25.9369	25.1411	25.8061		8	8	8	22	22	22	54.208	0	23.842	568430000	10	Q2TPA8;B1AX78;B1AX77	Q2TPA8;B1AX78	Hydroxysteroid dehydrogenase-like protein 2	Hsdl2
NaN	26.7486	NaN	NaN	27.207	26.6521	26.0202	25.9491		5	5	5	27.9	27.9	27.9	38.036	0	60.284	1528500000	14	Q3TBT3-3;Q3TBT3;Q3TBT3-2;A0A494BBL9	Q3TBT3-3;Q3TBT3;Q3TBT3-2;A0A494BBL9	Stimulator of interferon genes protein	Tmem173
27.878	27.5073	26.9566	28.0759	27.8943	29.0027	27.7732	27.9599		21	21	21	42.9	42.9	42.9	66.289	0	230.68	4610500000	50	Q3TCN2;Q3TCN2-2	Q3TCN2;Q3TCN2-2	Putative phospholipase B-like 2;Putative phospholipase B-like 2 28 kDa form;Putative phospholipase B-like 2 40 kDa form;Putative phospholipase B-like 2 15 kDa form	Plbd2
25.7445	NaN	NaN	25.7784	26.572	26.1255	25.4095	25.533		9	9	9	29.9	29.9	29.9	52.471	0	64.994	860560000	15	Q3TDN2;Q3TDN2-2;D3Z2H4;D3YUP4;D6RE51	Q3TDN2;Q3TDN2-2	FAS-associated factor 2	Faf2
27.9281	27.125	26.9661	27.0344	27.27	26.0472	25.9203	26.1919		6	5	5	50.6	45.1	45.1	18.884	0	122.05	1545900000	16	Q6ZWQ5;Q3TGS7;Q3V2H3;O70493	Q6ZWQ5;Q3TGS7;Q3V2H3;O70493	Sorting nexin-12	Snx12
NaN	NaN	NaN	NaN	24.2085	25.3165	24.6163	NaN		5	5	5	11	11	11	48.327	0	12.929	277400000	7	Q3TIV5;Q3TIV5-2;Q3TIV5-3	Q3TIV5;Q3TIV5-2	Zinc finger CCCH domain-containing protein 15	Zc3h15
NaN	NaN	25.7668	NaN	25.6663	25.6161	25.5249	25.523		5	5	5	16.2	16.2	16.2	50.118	0	8.7966	637490000	4	Q3TJD7;B8JJB2;B8JJB3;Q8BVJ7;Q3TJD7-3	Q3TJD7	PDZ and LIM domain protein 7	Pdlim7
29.1289	29.0798	28.3505	28.6852	29.8953	30.4113	29.6184	28.9039		17	17	17	70.9	70.9	70.9	19.012	0	142.99	12327000000	51	Q80ZP8;Q3TMX5;Q9CXI5;F6USD5;F6T4L3;F7C1S6	Q80ZP8;Q3TMX5;Q9CXI5;F6USD5;F6T4L3	Mesencephalic astrocyte-derived neurotrophic factor	Manf
27.8053	26.8376	27.885	27.4654	27.846	27.8334	27.6169	26.9609		12	12	12	20.2	20.2	20.2	81.163	0	133.66	3282000000	24	Q3TVI8;D3YY15;D3Z2F0;D3YUE1	Q3TVI8	Pre-B-cell leukemia transcription factor-interacting protein 1	Pbxip1
27.122	NaN	26.8093	26.7858	27.3381	26.1681	27.292	28.3759		15	15	15	35.9	35.9	35.9	56.613	0	71.011	1990200000	27	Q3TW96;Q3TW96-2;A0A0R4J1F6;A0A0R4J085;Q3UHZ7;Q91YN5-2;Q91YN5-3;Q91YN5	Q3TW96;Q3TW96-2	UDP-N-acetylhexosamine pyrophosphorylase-like protein 1	Uap1l1
26.1856	25.4203	26.3627	26.6604	25.8863	24.7108	26.0874	25.9267		8	8	8	13.7	13.7	13.7	94.208	0	21.825	707030000	12	Q3U2G2;Q61316;E9Q0U7;Q61699-2;Q61699	Q3U2G2;Q61316	Heat shock 70 kDa protein 4	Hspa4
NaN	25.9935	NaN	26.3351	25.3817	24.8887	25.2161	25.7311		6	6	6	17.8	17.8	17.8	55.887	0	36.163	653150000	6	Q3U367;Q9JLJ2	Q3U367;Q9JLJ2	4-trimethylaminobutyraldehyde dehydrogenase	Aldh9a1
NaN	NaN	24.49	NaN	25.7295	26.6373	25.6689	25.739		6	6	6	30.8	30.8	30.8	36.353	0	20.019	924230000	9	Q3U3G8;Q9EPB5	Q3U3G8;Q9EPB5	Serine hydrolase-like protein	Serhl
27.8238	26.5151	26.1512	26.4869	27.187	28.4243	26.5468	27.0164		13	13	12	58.7	58.7	52	30.951	0	254.67	2815700000	26	Q3U4F0;Q91V61;Q91V61-2;A0A494BB84	Q3U4F0;Q91V61;Q91V61-2;A0A494BB84	Sideroflexin-3	Sfxn3
NaN	25.9705	NaN	NaN	23.9015	25.5366	25.1235	24.0678		8	4	4	12.7	8.1	8.1	72.584	0	17.532	456620000	7	Q3U741;Q501J6;Q3TU25;Q501J6-2	Q3U741;Q501J6;Q3TU25;Q501J6-2	Probable ATP-dependent RNA helicase DDX17	Ddx17
26.5802	NaN	26.3026	NaN	27.6906	27.1247	26.1574	25.5699		14	14	14	18.9	18.9	18.9	121.55	0	180.29	1492000000	21	Q3U7R1;Q3U7R1-2;A0A1W2P784	Q3U7R1;Q3U7R1-2;A0A1W2P784	Extended synaptotagmin-1	Esyt1
NaN	NaN	25.4615	NaN	25.8045	25.0452	25.7472	25.3928		3	3	3	12.5	12.5	12.5	38.361	0	20.557	507440000	10	Q3UF75;Q9EPC1	Q3UF75;Q9EPC1	Alpha-parvin	Parva
25.3023	NaN	25.5486	25.739	25.6366	25.2709	25.5334	25.4704		4	4	4	14.6	14.6	14.6	29.343	0	26.194	513020000	9	Q3UGC7;Q66JS6	Q3UGC7;Q66JS6	Eukaryotic translation initiation factor 3 subunit J-A;Eukaryotic translation initiation factor 3 subunit J-B	Eif3j1;Eif3j2
26.3919	26.2554	26.7411	27.1281	NaN	NaN	NaN	NaN		20	2	2	32.2	3.2	3.2	66.229	0	4.8453	417730000	2	Q3UGL1	Q3UGL1		Eps8
NaN	NaN	NaN	NaN	NaN	24.7706	24.906	24.7947		3	3	3	41.2	41.2	41.2	11.101	0	11.375	385910000	3	Q3UGS4	Q3UGS4	Protein FAM195B	Fam195b
NaN	NaN	NaN	25.9413	25.5996	25.2376	25.5762	26.3538		9	9	4	10.8	10.8	4.7	171.12	0	35.457	562400000	11	Q3UH60;Q3UH60-2;A0A1Y7VMZ0;B7ZMZ7;B2RQ71;E9PWR4	Q3UH60;Q3UH60-2	Disco-interacting protein 2 homolog B	Dip2b
NaN	NaN	NaN	26.6023	26.7031	25.0173	NaN	26.3018		7	7	7	7.6	7.6	7.6	211.61	0	21.912	616980000	9	Q3UH93;F6T0L5	Q3UH93	Plexin-D1	Plxnd1
NaN	26.0021	NaN	NaN	26.275	25.2055	25.2173	25.1011		7	7	7	16	16	16	59.533	0	17.046	534660000	11	Q3UHD6-2;Q3UHD6;A0A0G2JF85;A0A0G2JG07;A0A0G2JGD5	Q3UHD6-2;Q3UHD6;A0A0G2JF85	Sorting nexin-27	Snx27
NaN	NaN	NaN	NaN	24.3222	25.3179	NaN	24.4231		1	1	1	12.5	12.5	12.5	15.515	0	3.5122	276820000	4	Q3UIU2	Q3UIU2	NADH dehydrogenase [ubiquinone] 1 beta subcomplex subunit 6	Ndufb6
27.3966	27.1391	27.0065	27.2853	27.4221	28.811	28.508	27.5284		21	21	21	23.7	23.7	23.7	133.57	0	228.82	4288500000	45	Q3UPL0;Q3UPL0-2;S4R2A9;S4R192;S4R256;S4R1T5;Q3UPL0-3;S4R1Y8	Q3UPL0;Q3UPL0-2;S4R2A9	Protein transport protein Sec31A	Sec31a
25.5814	NaN	25.5049	26.5589	25.7278	25.7346	26.2471	26.3943		11	11	11	13.9	13.9	13.9	120.79	0	27.185	911220000	15	Q3V117;Q91V92;Q3TS02	Q3V117;Q91V92	ATP-citrate synthase	Acly
29.356	29.2869	28.4823	29.0734	29.1814	28.6655	27.7256	28.4688		38	38	38	49.5	49.5	49.5	105.73	0	246.89	7203300000	75	Q3V3R1	Q3V3R1	Monofunctional C1-tetrahydrofolate synthase, mitochondrial	Mthfd1l
25.102	26.3687	25.3848	25.6437	25.279	27.2028	27.117	25.6968		12	12	12	30.4	30.4	30.4	65.583	0	70.508	1387500000	17	Q5SF07;A6X8Z3;Q5SF07-2	Q5SF07;A6X8Z3;Q5SF07-2	Insulin-like growth factor 2 mRNA-binding protein 2	Igf2bp2
24.4315	24.7175	NaN	26.0846	NaN	NaN	NaN	NaN		15	3	3	13.1	2.8	2.8	145.66	0	7.0408	389030000	6	Q5SQX6;F6QD74	Q5SQX6;F6QD74	Cytoplasmic FMR1-interacting protein 2	Cyfip2
26.5049	NaN	26.748	27.2205	26.8098	26.177	26.2799	26.6196		9	9	9	30.1	30.1	30.1	47.116	0	35.42	1238400000	21	Q5SS83;Q60634-3;Q60634-2;Q60634	Q5SS83;Q60634-3;Q60634-2;Q60634	Flotillin-2	Flot2
NaN	NaN	NaN	25.6889	25.4022	27.0724	27.49	25.7762		7	7	7	17.8	17.8	17.8	67.73	0	36.745	1166400000	11	Q5SUH7;Q5SUH6;Q99KN9;Q99KN9-2	Q5SUH7;Q5SUH6;Q99KN9;Q99KN9-2	Clathrin interactor 1	Clint1
29.9769	30.275	29.6965	29.8021	29.2807	29.2164	29.12	28.5457		21	21	0	83.2	83.2	0	22.372	0	323.31	10154000000	56	Q5SW88;Q5SW87;Q5SW86	Q5SW88;Q5SW87;Q5SW86		Rab1
28.0444	26.6125	25.8557	NaN	27.489	26.255	25.525	NaN		10	10	8	23.3	23.3	18.4	61.014	0	22.313	1099200000	15	Q5SX75;Q60716-2;Q60716;Q5SX76;B0QZH2;B0QZH3;F6ULE1	Q5SX75;Q60716-2;Q60716	Prolyl 4-hydroxylase subunit alpha-2	P4ha2
31.0974	30.9113	32.2894	31.4713	30.5306	30.549	31.4294	30.7825		78	78	78	55	55	55	191.98	0	323.31	33165000000	225	Q5SXR6;Q68FD5;F6Z1R4	Q5SXR6;Q68FD5	Clathrin heavy chain;Clathrin heavy chain 1	Cltc
26.6487	NaN	26.6291	26.3845	26.6415	25.6906	26.7004	26.517		9	9	9	12.9	12.9	12.9	116.08	0	48.821	1080800000	20	Q5SYD0;Q5SYD0-2;Q5SUA5	Q5SYD0;Q5SYD0-2	Unconventional myosin-Id	Myo1d
NaN	NaN	NaN	NaN	25.0734	24.8615	25.3439	NaN		6	6	6	17.2	17.2	17.2	57.229	0	18.955	495600000	7	Q5XJY5	Q5XJY5	Coatomer subunit delta	Arcn1
29.4861	29.0483	28.4271	28.7105	29.4237	28.7191	27.3235	28.2403		28	28	20	34.1	34.1	30.1	116.03	0	263.79	6916800000	64	Z4YJV4;Q60597-2;Q60597;Q60597-4;Q60597-3	Z4YJV4;Q60597-2;Q60597;Q60597-4;Q60597-3	2-oxoglutarate dehydrogenase, mitochondrial	Ogdh
27.1398	NaN	27.6816	28.031	27.7268	28.3407	28.4925	29.2172		17	17	17	31.9	31.9	31.9	61.249	0	44.549	4235600000	31	Q60598;Q921L6	Q60598;Q921L6	Src substrate cortactin	Cttn
24.5177	NaN	24.6483	24.234	25.5376	25.4911	24.9874	25.4612		1	1	1	11.4	11.4	11.4	20.824	0	59.71	448310000	5	Q60648	Q60648	Ganglioside GM2 activator	Gm2a
31.0545	30.9956	29.6922	28.3436	30.9723	30.2938	29.4919	27.7608		33	33	2	66.1	66.1	3.4	60.909	0	323.31	17618000000	109	Q60715	Q60715	Prolyl 4-hydroxylase subunit alpha-1	P4ha1
NaN	NaN	NaN	NaN	25.6947	27.1148	NaN	24.9152		33	2	2	66.5	3.7	3.7	60.885	0	6.4466	824960000	4	Q60715-2;E9Q7B0	Q60715-2;E9Q7B0	Prolyl 4-hydroxylase subunit alpha-1	P4ha1
26.5009	26.6954	26.5479	25.4919	27.4132	26.9935	26.6573	25.1845		6	6	6	18.1	18.1	18.1	44.887	0	23.624	1524800000	13	Q60766-2;Q60766	Q60766-2;Q60766	Immunity-related GTPase family M protein 1	Irgm1
26.2797	NaN	25.7934	26.7379	26.3243	24.9901	25.8925	26.3539		8	8	8	19.2	19.2	19.2	61.678	0	47.286	828190000	13	Q60770-2;Q60770;A0A0G2JEI5;A2AEC9;A0A0G2JEQ3	Q60770-2;Q60770;A0A0G2JEI5	Syntaxin-binding protein 3	Stxbp3
27.6652	27.4426	27.1432	28.0501	27.3452	26.6803	27.3299	27.2732		16	16	16	40	40	40	62.581	0	42.553	2324300000	29	Q60864	Q60864	Stress-induced-phosphoprotein 1	Stip1
25.0544	NaN	26.9619	25.3951	26.1732	28.9737	28.1229	26.727		12	12	12	14.7	14.7	14.7	78.168	0	125.29	3127200000	23	Q60865;A2BH47;F6YP03;F6YLI0	Q60865	Caprin-1	Caprin1
28.6914	28.368	27.9773	27.3301	29.1146	29.745	28.3305	29.1945		17	17	17	59	59	59	30.752	0	76.778	7388400000	44	Q60931;J3QMG3	Q60931;J3QMG3	Voltage-dependent anion-selective channel protein 3	Vdac3
30.9714	30.6838	30.2209	30.6665	30.7018	30.5243	29.5926	30.0076		26	26	26	89	89	89	30.755	0	323.31	23281000000	115	Q60932-2;Q60932;F2Z471	Q60932-2;Q60932;F2Z471	Voltage-dependent anion-selective channel protein 1	Vdac1
NaN	NaN	NaN	NaN	27.4547	NaN	26.951	27.9234		3	2	2	8.2	8.2	8.2	37.24	0	4.5866	1157600000	9	Q61011	Q61011	Guanine nucleotide-binding protein G(I)/G(S)/G(T) subunit beta-3	Gnb3
24.5418	NaN	24.5159	NaN	24.5266	23.847	NaN	24.6416		4	4	4	10.6	10.6	10.6	57.432	0	5.9433	188900000	6	Q61035;G5E823;Q99KK9;A0A494BAV2	Q61035;G5E823;Q99KK9	Histidine--tRNA ligase, cytoplasmic;Probable histidine--tRNA ligase, mitochondrial	Hars;Hars2
25.4179	NaN	NaN	24.8703	26.4473	NaN	25.4382	25.7873		3	3	3	8.7	8.7	8.7	44.593	0	6.6146	394860000	6	Q61081;A0A1L1STC0	Q61081	Hsp90 co-chaperone Cdc37;Hsp90 co-chaperone Cdc37, N-terminally processed	Cdc37
28.0987	NaN	28.3733	27.6982	27.5512	27.4887	27.6101	27.7579		14	14	14	56.7	56.7	56.7	30.016	0	90.215	2822500000	34	Q61166;A0A0J9YVB9;D3YYK8;D3Z6G3;E9Q6X0;Q6PER3;Q8R001-2;Q8R001	Q61166	Microtubule-associated protein RP/EB family member 1	Mapre1
28.837	26.8924	28.5583	29.72	28.9817	28.2211	28.8891	30.3491		14	14	14	76.8	76.8	76.8	21.778	0	97.651	7789700000	39	Q61171;D3Z4A4	Q61171;D3Z4A4	Peroxiredoxin-2	Prdx2
NaN	25.2608	24.8654	25.4274	25.1935	24.0719	24.572	24.7879		4	3	3	9.7	7.7	7.7	70.148	0	8.8638	393750000	5	Q61233	Q61233	Plastin-2	Lcp1
27.2854	27.3371	26.3954	25.7452	27.5547	27.7219	26.5084	25.8942		21	21	21	16.2	16.2	16.2	196.58	0	58.236	2055700000	28	Q61292	Q61292	Laminin subunit beta-2	Lamb2
28.057	29.6336	28.6699	28.538	27.9239	28.3145	28.0484	27.535		6	6	6	19.2	19.2	19.2	27.956	0	24.265	5037100000	13	Q61335	Q61335	B-cell receptor-associated protein 31	Bcap31
25.1187	24.8053	NaN	25.7359	25.2664	24.4691	24.3576	25.8761		5	5	5	9.3	9.3	9.3	85.701	0	10.609	394240000	7	Q61391;A0A0A6YWB9;A0A0A6YW93;A0A0A6YY36	Q61391	Neprilysin	Mme
26.0816	25.4403	25.3012	NaN	25.9751	26.4723	25.1077	NaN		7	7	7	31.4	31.4	31.4	50.167	0	19.732	759380000	7	Q61398;D3YUE2;A0A0G2JE29;D3YWH0;D3YZE3	Q61398;D3YUE2;A0A0G2JE29	Procollagen C-endopeptidase enhancer 1	Pcolce
28.4754	27.5689	26.7534	27.4899	29.1935	28.5829	27.6895	27.8631		13	13	13	68.2	68.2	68.2	34.463	0	255.98	4392700000	32	Q61425	Q61425	Hydroxyacyl-coenzyme A dehydrogenase, mitochondrial	Hadh
NaN	23.8618	NaN	24.1208	25.694	28.3268	27.6617	25.7533		15	15	13	28.3	28.3	25.8	72.813	0	121	1896000000	28	Q61584-4;Q61584-7;Q61584-3;Q61584;A0A0G2JEP0;Q61584-5;Q61584-6;Q61584-2;A0A0H2UH27;A0A0G2JGL6;A0A0G2JGH0	Q61584-4;Q61584-7;Q61584-3;Q61584;A0A0G2JEP0;Q61584-5;Q61584-6;Q61584-2;A0A0H2UH27	Fragile X mental retardation syndrome-related protein 1	Fxr1
29.1801	26.9183	28.8924	29.3791	29.6073	28.5208	29.4747	30.3421		28	28	22	73	73	61.6	50.537	0	208.83	8298200000	73	Q61598;Q61598-2;A0A1Y7VL99;A0A1Y7VLG4	Q61598;Q61598-2;A0A1Y7VL99	Rab GDP dissociation inhibitor beta	Gdi2
NaN	NaN	25.7884	24.5939	24.7627	26.8521	26.0516	25.1144		11	10	7	17.9	16.1	13	69.265	0	50.437	945780000	12	Q8BTS0;Q61656;S4R1I6;S4R1E3;B1ARC0;B1ARB9	Q8BTS0;Q61656;S4R1I6	Probable ATP-dependent RNA helicase DDX5	Ddx5
27.4695	26.9886	27.0514	27.2791	27.634	27.7014	28.353	28.1497		18	18	18	25.8	25.8	25.8	109.55	0	72.236	3148700000	34	Q61768;E9QAK5;P28738;P33175;A2ARD4	Q61768;E9QAK5	Kinesin-1 heavy chain;Kinesin-like protein	Kif5b
27.0135	28.7951	27.9596	27.2425	27.9362	29.1673	28.2715	27.8953		12	12	12	44.2	44.2	44.2	32.56	0	216.86	5930500000	37	Q61937;Q5SQB0;Q9DAY9;Q5SQB5	Q61937;Q5SQB0;Q9DAY9;Q5SQB5	Nucleophosmin	Npm1
29.2383	29.9008	27.8159	28.6964	29.0892	28.9478	27.3366	28.09		25	25	25	26.2	26.2	26.2	113.84	0	232.03	7041400000	60	Q61941;Q8C9V5;Q8BGK0;E9Q8F4	Q61941;Q8C9V5;Q8BGK0;E9Q8F4	NAD(P) transhydrogenase, mitochondrial	Nnt
28.5221	28.9364	28.8661	28.2546	28.4929	27.891	27.769	27.4767		7	7	7	38.1	38.1	38.1	39.617	0	65.52	4853400000	24	Q62086	Q62086	Serum paraoxonase/arylesterase 2	Pon2
27.1195	27.5923	26.967	28.1729	26.0228	26.5546	26.8582	27.3689		5	5	5	4.3	4.3	4.3	96.904	0	10.76	1933200000	13	Q62165	Q62165	Dystroglycan;Alpha-dystroglycan;Beta-dystroglycan	Dag1
27.8591	28.4713	28.4467	27.7574	28.2087	29.5031	28.8368	27.7852		28	28	8	48.5	48.5	21.6	73.101	0	217.49	6182200000	56	Q62167;P16381	Q62167;P16381	ATP-dependent RNA helicase DDX3X;Putative ATP-dependent RNA helicase Pl10	Ddx3x;D1Pas1
27.255	NaN	26.7993	26.4324	27.8088	28.047	27.8707	26.7971		6	6	6	34.1	34.1	34.1	19.007	0	31.269	2388200000	15	Q9D8L3;Q62186	Q9D8L3;Q62186	Translocon-associated protein subunit delta	Ssr4
26.4775	NaN	26.124	27.043	25.8607	24.9114	24.984	27.0296		13	11	9	31.1	28.1	26.7	61.936	0	29.012	881460000	13	Q62188;Q3TT92;E9PWE8	Q62188;Q3TT92;E9PWE8	Dihydropyrimidinase-related protein 3	Dpysl3
30.4683	28.9863	29.2904	31.0773	30.6363	29.9024	30.2243	31.2825		94	94	92	47.7	47.7	47	274.22	0	323.31	19245000000	204	Q62261;A0A0A0MQG2;Q62261-2;Q68FG2;E9Q397;Q3UGX2;P15508;A0A5F8MPM8;D3YWH8;A0A494BBH5	Q62261;A0A0A0MQG2;Q62261-2	Spectrin beta chain, non-erythrocytic 1	Sptbn1
27.2318	NaN	25.9903	26.9697	27.3672	27.5861	27.4654	26.6006		14	14	14	21.6	21.6	21.6	85.73	0	43.373	2112900000	23	Q62351;Q8C872	Q62351;Q8C872	Transferrin receptor protein 1	Tfrc
26.4143	25.846	27.197	27.5156	27.1765	25.5834	26.4301	26.965		11	11	11	32.8	32.8	32.8	48.428	0	34.443	1490200000	21	Q62418-2;Q62418-3;Q62418	Q62418-2;Q62418-3;Q62418	Drebrin-like protein	Dbnl
28.3237	28.654	NaN	26.8956	28.4905	27.8376	26.9814	27.452		9	9	9	90.2	90.2	90.2	9.3267	0	18.648	3516600000	18	Q62425;A0A0N4SVQ1	Q62425;A0A0N4SVQ1	Cytochrome c oxidase subunit NDUFA4	Ndufa4
27.1881	NaN	27.0185	28.0046	26.4663	24.2733	26.6176	25.9949		6	6	6	70.4	70.4	70.4	11.045	0	11.646	1222300000	16	Q62426	Q62426	Cystatin-B	Cstb
25.7421	26.9437	26.0884	27.4858	25.3078	26.4303	26.626	27.9516		7	7	7	24.9	24.9	24.9	43.008	0	45.498	1747500000	15	Q62433;E9Q514;E9Q5I8;E9Q3F9;E9PVF3;E9Q0J8;E9PZC7;E9Q7G8;E9Q147;E9Q7V2;F6VLR8	Q62433	Protein NDRG1	Ndrg1
NaN	28.4104	25.1162	24.9916	26.2412	29.1769	27.3809	26.7665		16	16	16	73.2	73.2	73.2	25.147	0	43.429	3805100000	25	Q62446;A0A1Y7VLK0;A0A1Y7VP01;A0A1Y7VMJ9;A0A1Y7VJ86	Q62446;A0A1Y7VLK0	Peptidyl-prolyl cis-trans isomerase FKBP3	Fkbp3
30.8745	30.4465	31.1325	30.7701	30.6951	31.275	31.2481	30.9302		23	23	23	53.4	53.4	53.4	43.096	0	323.31	31843000000	125	Q62465	Q62465	Synaptic vesicle membrane protein VAT-1 homolog	Vat1
28.7673	28.019	27.8893	NaN	29.3973	29.3537	29.1863	26.4517		16	16	16	24.6	24.6	24.6	116.74	0	202.95	5690800000	44	Q62470;Q62470-2;Q62470-3;F6UD16	Q62470;Q62470-2;Q62470-3	Integrin alpha-3;Integrin alpha-3 heavy chain;Integrin alpha-3 light chain	Itga3
27.0232	27.5597	26.9289	27.6479	26.0573	25.646	26.8593	26.459		6	6	6	15.2	15.2	15.2	57.026	0	43.703	1556000000	17	Q7TQE2;Q62523;A0A0N4SVD2;A0A0N4SUX7;A0A0N4SVP4	Q7TQE2;Q62523;A0A0N4SVD2;A0A0N4SUX7;A0A0N4SVP4	Zyxin	Zyx
NaN	NaN	NaN	NaN	26.5594	25.657	26.0784	NaN		6	6	6	14.2	14.2	14.2	84.982	0	82.693	505200000	7	Q640N1-2;Q640N1;A0A0R4J0C4;Q9D2L5	Q640N1-2;Q640N1	Adipocyte enhancer-binding protein 1	Aebp1
28.6197	28.1812	27.4097	28.5405	29.2539	28.7908	27.4924	28.6183		23	23	23	61	61	61	59.601	0	223.81	5949300000	56	Q64133	Q64133	Amine oxidase [flavin-containing] A	Maoa
24.802	25.6877	25.7051	26.2771	26.1273	28.0099	26.4242	26.1094		8	8	8	58.6	58.6	58.6	17.699	0	57.212	1969900000	12	Q64152-2;Q64152	Q64152-2;Q64152	Transcription factor BTF3	Btf3
27.6828	27.743	27.9252	26.8497	26.923	26.9671	26.7965	26.7517		9	9	9	30.6	30.6	30.6	37.022	0	77.112	2833600000	20	Q64191;B7ZNK6	Q64191;B7ZNK6	N(4)-(beta-N-acetylglucosaminyl)-L-asparaginase;Glycosylasparaginase alpha chain;Glycosylasparaginase beta chain	Aga
26.1457	NaN	25.2599	26.0273	26.5884	25.9017	25.9801	26.8185		10	10	10	26	26	26	66.357	0	28.047	933550000	13	Q64324;F8WGM5;A0A140LJH9	Q64324;F8WGM5	Syntaxin-binding protein 2	Stxbp2
25.9637	26.444	25.3521	25.525	26.8116	26.4753	26.3096	27.6495		9	9	9	32.4	32.4	32.4	44.192	0	28.821	1531300000	24	Q64337-2;Q64337;D3YZJ1;F6VD69	Q64337-2;Q64337;D3YZJ1	Sequestosome-1	Sqstm1
NaN	NaN	NaN	26.9022	27.776	27.0115	27.3569	26.1739		6	6	6	32.9	32.9	32.9	17.897	0	59.282	2084100000	13	Q64339	Q64339	Ubiquitin-like protein ISG15	Isg15
30.8284	31.253	30.0037	30.6146	29.7412	29.7719	29.1086	29.5912		18	18	18	90.2	90.2	90.2	10.963	0	64.207	16596000000	57	Q64433;Q9JI95	Q64433;Q9JI95	10 kDa heat shock protein, mitochondrial	Hspe1;Cpn10-rs1
27.871	27.4193	27.5081	27.9738	27.3954	26.4621	27.0429	28.32		11	11	11	56.6	56.6	56.6	38.249	0	145.16	2628800000	25	Q64442	Q64442	Sorbitol dehydrogenase	Sord
29.2326	29.0941	29.8714	27.9889	29.1781	30.4061	29.8976	27.6626		8	8	1	62.8	62.8	14	13.988	0	126.34	10085000000	25	Q64523;Q6GSS7	Q64523;Q6GSS7	Histone H2A type 2-C;Histone H2A type 2-A	Hist2h2ac;Hist2h2aa1
28.9665	NaN	29.1341	28.256	28.7457	27.7984	28.7411	28.2633		26	26	26	33.5	33.5	33.5	116.72	0	150.4	4907400000	58	Q64727;A0A286YDJ4	Q64727	Vinculin	Vcl
27.1992	28.5171	26.9063	27.3046	26.7941	28.4147	27.8324	27.2156		22	22	22	28.1	28.1	28.1	121.64	0	200.55	3397200000	32	Q6A0A9	Q6A0A9	Constitutive coactivator of PPAR-gamma-like protein 1	FAM120A
27.4519	28.0887	27.6444	26.5891	28.4914	29.3729	28.6012	27.6583		25	25	25	32.6	32.6	32.6	133.42	0	147.23	5020100000	44	Q6GQT9	Q6GQT9	Nodal modulator 1	Nomo1
NaN	NaN	NaN	NaN	26.441	NaN	26.549	26.0599		2	2	2	9	9	9	35.955	0	18.779	536140000	5	Q6GV12	Q6GV12	3-ketodihydrosphingosine reductase	Kdsr
29.1668	28.2744	29.3661	29.2148	28.2248	27.9606	28.8343	28.8666		17	13	13	68.1	59.7	59.7	28.467	0	103.34	5774400000	39	Q6IRU2;A0A571BEU1	Q6IRU2;A0A571BEU1	Tropomyosin alpha-4 chain	Tpm4
NaN	27.0676	26.2919	26.8994	24.5845	25.0941	25.2102	25.8414		9	7	7	20.3	16.3	16.3	58.878	0	42.472	864950000	13	Q6NZD2;Q9WV80;D3YWH1	Q6NZD2;Q9WV80	Sorting nexin-1	Snx1
NaN	25.366	NaN	NaN	25.1344	26.1357	25.7007	25.3		8	6	6	14.8	12.5	12.5	74.252	0	49.606	688930000	11	Q6P5B5;Q9WVR4	Q6P5B5;Q9WVR4	Fragile X mental retardation syndrome-related protein 2	Fxr2
30.184	29.6683	29.7306	28.6443	30.2575	30.1732	29.0996	28.3294		49	49	46	45	45	43.2	176.43	0	323.31	13325000000	114	Q6P5E4;G3UYG7;G3UZU8;G3UY35;G3UY73	Q6P5E4	UDP-glucose:glycoprotein glucosyltransferase 1	Uggt1
24.4563	NaN	NaN	NaN	24.6537	24.4512	NaN	24.4399		4	4	4	11	11	11	67.335	0	31.379	241240000	4	Q6P8N8;Q9JHS4;F7BB92	Q6P8N8;Q9JHS4;F7BB92	ATP-dependent Clp protease ATP-binding subunit clpX-like, mitochondrial	Clpx
25.5354	25.6732	24.5971	25.7489	26.6288	27.3624	26.4518	26.3675		11	11	11	32	32	32	46.648	0	23.072	1354700000	20	Q6P8X1;A0A1W2P701;A0A1W2P6Y0	Q6P8X1;A0A1W2P701	Sorting nexin-6;Sorting nexin-6, N-terminally processed	Snx6
NaN	NaN	25.6494	25.6012	25.8308	25.6007	25.5764	25.3394		5	5	4	11.3	11.3	9.4	66.223	0	17.622	638720000	12	Q6PA06;E9QND8;Q6PA06-2	Q6PA06;E9QND8;Q6PA06-2	Atlastin-2	Atl2
28.6276	28.6662	27.1059	27.521	28.6423	28.8125	26.8567	27.7413		30	30	30	31.1	31.1	31.1	156.61	0	181.99	4485600000	46	Q6PB66	Q6PB66	Leucine-rich PPR motif-containing protein, mitochondrial	Lrpprc
NaN	NaN	NaN	25.1044	24.746	24.5298	24.3524	24.5728		4	4	4	9.9	9.9	9.9	61.16	0	40.763	327560000	6	Q6PF96;Q921G7	Q6PF96;Q921G7	Electron transfer flavoprotein-ubiquinone oxidoreductase, mitochondrial	Etfdh
NaN	NaN	24.4191	NaN	23.4984	23.7725	24.1025	23.6211		2	2	2	15.5	15.5	15.5	14.902	0	3.5311	167470000	2	Q6PGB6-3;Q6PGB6-2;Q6PGB6;Q6PGB6-4;Q6PGB6-5	Q6PGB6-3;Q6PGB6-2;Q6PGB6;Q6PGB6-4;Q6PGB6-5	N-alpha-acetyltransferase 50	Naa50
24.3621	NaN	NaN	24.4636	26.6834	27.5601	26.3297	25.7508		13	13	13	17.5	17.5	17.5	136.08	0	72.574	1199700000	15	Q6PGL7-2;Q6PGL7;A0A0N4SV74;A0A0N4SUJ0	Q6PGL7-2;Q6PGL7;A0A0N4SV74;A0A0N4SUJ0	WASH complex subunit FAM21	Fam21
NaN	NaN	NaN	28.0026	27.8796	27.4428	27.6926	27.7871		11	11	11	22.8	22.8	22.8	91.199	0	89.846	2666700000	19	Q6PHU5;Q6PHU5-2	Q6PHU5;Q6PHU5-2	Sortilin	Sort1
27.4721	27.4897	27.8355	27.5534	27.3919	27.4541	26.6791	NaN		29	5	5	69.5	7.6	7.6	37.117	0	13.349	2285400000	9	Q6XLQ8	Q6XLQ8		Calu
NaN	NaN	25.2806	25.3697	25.5026	25.1035	25.5712	25.6034		4	4	4	4.6	4.6	4.6	136.33	0	11.067	466870000	8	Q6ZQ38	Q6ZQ38	Cullin-associated NEDD8-dissociated protein 1	Cand1
27.8784	27.6207	26.4755	27.8533	29.5409	29.5032	28.923	28.6664		12	12	12	43	43	43	32.342	0	68.22	6452300000	35	Q6ZQI3	Q6ZQI3	Malectin	Mlec
28.2355	30.4547	30.1759	29.4429	28.5083	30.4492	30.6269	29.3413		25	25	25	59.3	59.3	59.3	22.591	0	74.146	16637000000	73	Q6ZWN5;F7CJS8;D3YWH9;Q9CXW7;D3Z673;D3YUV6	Q6ZWN5;F7CJS8;D3YWH9;Q9CXW7	40S ribosomal protein S9	Rps9
25.9663	NaN	NaN	NaN	25.6324	26.7964	25.8464	25.5328		3	3	3	17.8	17.8	17.8	20.313	0	8.5359	1122700000	3	Q6ZWQ7	Q6ZWQ7		Spcs3
28.8069	27.1948	28.4796	29.0757	28.111	26.6207	27.7713	28.4147		7	7	1	39	39	11.6	19.895	0	147.38	3507800000	31	Q6ZWQ9	Q6ZWQ9		Myl12a
28.6813	30.6786	30.7057	30.1914	29.2182	30.8365	30.3814	29.7516		23	23	23	71	71	71	24.604	0	205.99	21578000000	81	Q6ZWV3;I7HLV2;P86048;A0A1B0GXC3	Q6ZWV3;I7HLV2;P86048	60S ribosomal protein L10;60S ribosomal protein L10-like	Rpl10;Rpl10l
26.0502	27.6582	28.6517	28.0096	27.8446	30.5597	30.9143	29.5755		9	9	9	48	48	48	14.552	0	26.878	11571000000	23	Q6ZWV7	Q6ZWV7	60S ribosomal protein L35	Rpl35
25.8727	27.6315	27.761	NaN	26.7032	26.6749	26.9427	26.3692		10	10	10	36.5	36.5	36.5	36.108	0	98.608	1698800000	23	Q6ZWX6	Q6ZWX6	Eukaryotic translation initiation factor 2 subunit 1	Eif2s1
NaN	NaN	26.4209	25.6051	25.4393	26.4707	26.0466	25.514		8	2	2	45.2	14.3	14.3	9.4771	0	4.4063	907150000	3	Q6ZWY3;D6RH49;D3YYB0	Q6ZWY3;D6RH49;D3YYB0	40S ribosomal protein S27-like;40S ribosomal protein S27	Rps27l
26.9747	28.0322	29.0781	28.0256	27.2539	28.5244	28.3047	27.7064		9	9	9	39	39	39	12.254	0	30.041	4927300000	28	Q6ZWZ4;P47964	Q6ZWZ4;P47964	60S ribosomal protein L36	Rpl36
27.6945	30.0526	30.4831	27.6527	28.9995	30.3824	30.2026	29.4964		18	18	18	70.1	70.1	70.1	21.397	0	177.01	15383000000	53	Q6ZWZ7;Q9CPR4;B2RY53	Q6ZWZ7;Q9CPR4	60S ribosomal protein L17	Rpl17
27.9406	27.4903	27.965	28.1683	26.9363	26.9328	27.3018	27.9471		15	15	15	34.3	34.3	34.3	65.322	0	45.161	2683400000	27	Q76MZ3;G3UWL2;H3BLQ0;Q3TTF6;H3BKU1;G3UWS4;Q7TNP2;G3UXQ1;H3BIV7;H3BLE7;H3BJ83	Q76MZ3	Serine/threonine-protein phosphatase 2A 65 kDa regulatory subunit A alpha isoform	Ppp2r1a
NaN	NaN	25.2617	25.3814	26.6457	27.3988	26.0954	26.4462		4	4	4	77.6	77.6	77.6	6.3814	0	28.865	1353300000	9	Q78IK2	Q78IK2	Up-regulated during skeletal muscle growth protein 5	Usmg5
30.5673	30.503	30.8103	30.4739	31.0922	31.9205	31.6086	31.3118		65	65	65	76.9	76.9	76.9	102.09	0	323.31	40476000000	233	Q78PY7;Q3TJ56;E9Q3E9	Q78PY7;Q3TJ56	Staphylococcal nuclease domain-containing protein 1	Snd1
28.5275	28.1781	28.1111	27.3353	27.5508	27.5011	27.2922	26.7879		15	15	14	80.9	80.9	75.3	18.762	0	81.499	2947600000	29	Q78ZM0;D3Z789;O70492;D3Z6Z0	Q78ZM0;D3Z789;O70492;D3Z6Z0	Sorting nexin-3	Snx3
27.4684	NaN	25.9454	26.3895	26.3379	25.9495	25.3746	25.6561		5	5	5	27.4	27.4	27.4	33.499	0	86.824	1272100000	20	Q791V5;A2AFW6;Q9D050;D6RCZ1	Q791V5;A2AFW6;Q9D050	Mitochondrial carrier homolog 2	Mtch2
28.1959	28.0578	27.1899	29.1571	27.5494	27.524	28.117	28.5068		20	20	8	17.7	17.7	7.4	145.24	0	121.92	3985200000	44	Q7TMB8;Q7TMB8-2;A0A0R4J119;A0A0U1RQ05;G3UZI5	Q7TMB8;Q7TMB8-2;A0A0R4J119;A0A0U1RQ05	Cytoplasmic FMR1-interacting protein 1	Cyfip1
29.9646	28.9047	30.0177	30.0557	29.4816	28.8963	29.6417	29.3435		60	33	32	66.1	44.8	43.2	103.07	0	214.55	10129000000	92	Q7TPR4;A1BN54;O88990	Q7TPR4;A1BN54	Alpha-actinin-1	Actn1
25.5302	NaN	NaN	NaN	25.6474	26.7462	26.4425	25.5711		7	7	7	5.9	5.9	5.9	229.2	0	16.761	947230000	9	Q7TSC1;G3UX48	Q7TSC1;G3UX48	Protein PRRC2A	Prrc2a
NaN	NaN	26.0504	NaN	25.1922	25.6657	25.7517	26.7286		11	11	11	7.8	7.8	7.8	194.75	0	27.122	765940000	16	Q7TT50;A0A1Y7VLI0;F6YZJ7;F6S5Z6;F6Q5A5;H7BX44;D3YYN8;E9PVY0;A0A1D5RLQ9;Q3UU96-2;Q80UW5;Q3UU96	Q7TT50	Serine/threonine-protein kinase MRCK beta	Cdc42bpb
25.1251	NaN	25.0606	25.2066	NaN	23.6592	24.4608	24.5763		2	2	1	4.5	4.5	2.6	58.951	0.00051867	2.7473	297420000	3	Q80SW1	Q80SW1	Putative adenosylhomocysteinase 2	Ahcyl1
26.891	26.9828	25.4663	25.9854	27.0312	26.9127	26.1807	25.8435		11	11	11	18.9	18.9	18.9	91.83	0	42.519	1613500000	20	Q80UM7	Q80UM7	Mannosyl-oligosaccharide glucosidase	Mogs
26.1446	25.6852	26.2196	26.0117	26.0155	25.472	25.9795	25.7576		5	4	4	18	13.8	13.8	23.334	0	19.6	904130000	7	Q80UU9	Q80UU9	Membrane-associated progesterone receptor component 2	Pgrmc2
NaN	NaN	NaN	NaN	24.3547	24.3606	NaN	24.7999		3	3	3	4.1	4.1	4.1	114.03	0	5.9142	265300000	5	Q80VP0-2;Q80VP0	Q80VP0-2;Q80VP0	Tectonin beta-propeller repeat-containing protein 1	Tecpr1
27.8523	28.5493	28.1458	27.5072	27.2415	29.3381	28.0309	27.1255		17	17	17	32.6	32.6	32.6	63.845	0	262.45	5277500000	32	Q80WJ7;F6QHD1;F6QFT1;F6ZSG0;F6ZQL0;E9PUX0	Q80WJ7;F6QHD1;F6QFT1	Protein LYRIC	Mtdh
NaN	NaN	NaN	NaN	24.1611	NaN	24.9185	24.9371		3	3	3	13.6	13.6	13.6	39.237	0	8.2274	255880000	5	Q8CFV7;Q8CAA2;Q80X80	Q8CFV7;Q8CAA2;Q80X80	C2 domain-containing protein 2-like	C2cd2l
25.863	26.673	26.6013	26.5091	26.5611	26.9629	27.1171	26.3098		21	17	15	11.8	10.7	9.5	277.82	0	101.09	1492900000	21	Q80X90	Q80X90	Filamin-B	Flnb
NaN	NaN	NaN	NaN	24.9469	24.0553	NaN	24.658		4	4	4	8.1	8.1	8.1	80.614	0	6.6273	241270000	4	Q80YS6;E9Q8X9	Q80YS6;E9Q8X9	Actin filament-associated protein 1	Afap1
NaN	NaN	NaN	NaN	25.4974	24.3593	NaN	25.5198		7	2	2	43.7	20.8	20.8	20.642	0	17.179	293720000	5	Q80ZJ1;Q80ZJ1-2;Q8BU31	Q80ZJ1;Q80ZJ1-2;Q8BU31	Ras-related protein Rap-2a;Ras-related protein Rap-2c	Rap2a;Rap2c
NaN	NaN	NaN	24.223	25.2725	26.3627	NaN	25.1179		8	8	8	9.4	9.4	9.4	135.55	0	29.066	618440000	10	Q80ZX0;F6VJC5	Q80ZX0		Sec24b
27.3344	NaN	26.8593	28.6432	28.4855	27.2485	27.9041	29.9881		19	19	19	22.3	22.3	22.3	131.27	0	81.073	4296400000	41	Q810U4-2;A0A1W2P7Y9;Q810U4;Q810U4-3;A0A1W2P6P3;A0A1W2P814;Q810U4-4;Q810U4-5;A0A1W2P7R6	Q810U4-2;A0A1W2P7Y9;Q810U4;Q810U4-3	Neuronal cell adhesion molecule	Nrcam
30.3063	30.7799	30.3924	30.0133	29.7165	29.9829	29.577	29.3502		18	18	18	37.1	37.1	37.1	61.174	0	170.21	14854000000	44	Q8BFR4;A0A1W2P8D3	Q8BFR4	N-acetylglucosamine-6-sulfatase	Gns
28.8411	28.4768	27.8087	28.0551	27.9766	27.7782	27.1819	27.7889		17	17	17	43.4	43.4	43.4	49.508	0	166.58	3999700000	31	Q8BFR5;Q8BFR5-2;A0A0U1RPC4;A0A0U1RNQ6	Q8BFR5;Q8BFR5-2	Elongation factor Tu, mitochondrial	Tufm
26.6846	NaN	27.2405	26.9224	26.3624	25.4803	25.9085	26.1891		9	9	9	20.7	20.7	20.7	65.89	0	20.383	1084800000	17	Q8BFW7;Q8BFW7-4;Q8BFW7-5;Q8BFW7-3;Q8BFW7-2	Q8BFW7;Q8BFW7-4;Q8BFW7-5	Lipoma-preferred partner homolog	Lpp
27.1674	27.4088	27.2155	25.5732	28.0812	29.0187	28.3076	28.1456		18	18	18	63.8	63.8	63.8	37.872	0	146.85	4385500000	36	Q8BFZ9;A0A1B0GT70;A0A1B0GSD8;A0A1B0GQZ0;A0A1B0GT43;A0A1B0GRQ1;Q91X78;A0A1B0GRG7;E9PUH5	Q8BFZ9;A0A1B0GT70	Erlin-2	Erlin2
NaN	NaN	NaN	NaN	24.5959	24.8319	NaN	24.3022		4	4	4	15.6	15.6	15.6	40.528	0	8.3991	408160000	6	Q8BGC4;A0A494BB38	Q8BGC4;A0A494BB38	Zinc-binding alcohol dehydrogenase domain-containing protein 2	Zadh2
NaN	26.8597	NaN	26.6699	26.6085	27.3164	27.544	26.7468		7	7	7	16.9	16.9	16.9	68.839	0	67.371	1783000000	16	Q8BGD9;B2RWE8	Q8BGD9;B2RWE8	Eukaryotic translation initiation factor 4B	Eif4b
NaN	NaN	NaN	NaN	26.2573	25.7635	NaN	25.5392		4	4	4	11.9	11.9	11.9	51.863	0	9.2207	448640000	7	Q8BGH2	Q8BGH2	Sorting and assembly machinery component 50 homolog	Samm50
24.3082	28.1824	25.8804	24.9443	25.223	27.4935	25.9354	25.7885		12	12	11	34.4	34.4	32.1	56.891	0	111.03	1628300000	17	Q8BGJ5;Q922I7;Q8CB58;P17225;E9QMW9;F7AXP1;E9Q0W3;E9Q279;F7DCW4	Q8BGJ5;Q922I7;Q8CB58;P17225;E9QMW9	Polypyrimidine tract-binding protein 1	Ptbp1
28.2819	NaN	28.768	27.54	28.2021	28.7682	28.7458	28.1415		13	13	13	56.3	56.3	56.3	29.736	0	129.7	5202500000	30	Q8BH40;O70439	Q8BH40;O70439	Syntaxin-7	Stx7
26.945	NaN	27.2674	27.5036	26.3815	26.3666	27.1622	27.1907		10	10	10	21.7	21.7	21.7	54.073	0	66.272	1758900000	23	Q8BH43;B1AUN0;Q8R5H6	Q8BH43	Wiskott-Aldrich syndrome protein family member 2	Wasf2
NaN	25.1139	NaN	24.6119	27.5284	27.5458	25.5771	26.0892		13	13	11	30	30	27	74.569	0	183.74	1417400000	20	Q8BH59;V9GXX9	Q8BH59	Calcium-binding mitochondrial carrier protein Aralar1	Slc25a12
28.4313	27.4303	28.5309	28.1339	27.9473	28.7271	28.8924	28.0737		9	9	9	42.4	42.4	42.4	26.918	0	55.672	5432600000	30	Q8BH80;Q9QY76	Q8BH80;Q9QY76	Vesicle-associated membrane protein-associated protein B	Vapb
28.5434	27.5876	27.6162	28.4539	27.9084	28.0746	27.1687	28.0939		13	13	13	57.9	57.9	57.9	31.474	0	52.371	4011800000	33	Q8BH95	Q8BH95	Enoyl-CoA hydratase, mitochondrial	Echs1
NaN	25.8669	NaN	NaN	24.8983	25.4258	24.3508	24.0997		6	6	6	32	32	32	26.476	0	19.595	510280000	6	Q8BHC4;B0QZX9	Q8BHC4	Dephospho-CoA kinase domain-containing protein	Dcakd
NaN	NaN	26.1227	NaN	25.3963	25.2829	25.8029	25.89		5	5	5	8.9	8.9	8.9	82.542	0	6.3513	549080000	6	Q8BHL5-2;Q8BHL5;Q8BHL5-3;F6YXR3;Q8BPU7;Q8BPU7-4;Q8BPU7-2	Q8BHL5-2;Q8BHL5;Q8BHL5-3	Engulfment and cell motility protein 2	Elmo2
31.2658	31.6281	30.6139	30.3984	31.3729	31.1189	30.6394	30.3038		39	39	39	58.8	58.8	58.8	106.91	0	323.31	31205000000	138	Q8BHN3;Q8BHN3-2;Q8BHN3-3	Q8BHN3;Q8BHN3-2;Q8BHN3-3	Neutral alpha-glucosidase AB	Ganab
NaN	NaN	NaN	NaN	25.5199	25.4536	25.1541	NaN		4	4	4	12.9	12.9	12.9	55.357	0	30.003	395840000	4	Q8BHT6;Q8BHT6-2	Q8BHT6;Q8BHT6-2	Beta-1,3-glucosyltransferase	B3galtl
24.8049	NaN	NaN	NaN	26.3965	25.7349	24.6351	25.0302		3	3	3	13	13	13	28.96	0	29.139	558370000	9	Q8BIG7;H3BJ37	Q8BIG7	Catechol O-methyltransferase domain-containing protein 1	Comtd1
27.6618	27.5411	26.6776	27.0116	26.7279	26.6763	25.933	25.9961		12	12	12	15.9	15.9	15.9	112.8	0	33.382	1709100000	24	Q8BIJ6;E9PWN2;E9PWN3	Q8BIJ6;E9PWN2;E9PWN3	Isoleucine--tRNA ligase, mitochondrial	Iars2
NaN	NaN	NaN	24.7129	NaN	25.1603	25.6171	25.1689		4	4	4	17.3	17.3	17.3	35.152	0	7.9377	345070000	6	Q8BJH1;Q8BJH1-2	Q8BJH1;Q8BJH1-2	Zinc finger C2HC domain-containing protein 1A	Zc2hc1a
NaN	26.6299	26.6972	NaN	24.283	27.4463	26.1312	25.8416		11	11	11	26.5	26.5	26.5	64.403	0	22.174	1314200000	15	Q8BJW6;Q8BJW6-2;D3YZZ6;D6RFN2;D6RGA6	Q8BJW6;Q8BJW6-2	Eukaryotic translation initiation factor 2A;Eukaryotic translation initiation factor 2A, N-terminally processed	Eif2a
27.7703	27.926	27.8609	27.9521	27.72	27.5014	27.7195	28.6428		20	20	20	22.7	22.7	22.7	123.59	0	103.64	3482000000	35	Q8BKC5;Q8BKC5-2;Q8BIV3	Q8BKC5;Q8BKC5-2	Importin-5	Ipo5
25.8047	25.843	25.2976	25.5783	25.512	25.2917	25.1389	25.1518		6	6	6	15.4	15.4	15.4	53.998	0	22.125	615440000	6	Q8BKZ9;A2AWH8;A2AWH7	Q8BKZ9;A2AWH8	Pyruvate dehydrogenase protein X component, mitochondrial	Pdhx
27.0043	26.4936	28.2327	25.9323	27.0978	28.7193	28.2508	26.7401		32	32	32	30.7	30.7	30.7	160.91	0	126.71	3513600000	45	Q8BL66;A0A1W2P7A6	Q8BL66	Early endosome antigen 1	Eea1
28.5338	28.4207	29.2172	28.9	28.2328	28.27	28.7134	28.0049		15	15	15	46.8	46.8	46.8	45.739	0	166.18	5385400000	45	Q8BLF1;Q8BYQ0	Q8BLF1	Neutral cholesterol ester hydrolase 1	Nceh1
27.5477	26.9308	26.5028	NaN	28.0309	28.3127	26.9437	26.8525		16	16	16	40	40	40	52.901	0	112.5	2344100000	22	Q8BMD8	Q8BMD8	Calcium-binding mitochondrial carrier protein SCaMC-1	Slc25a24
28.6204	27.0209	27.2428	27.2823	28.7219	29.2121	27.7516	28.3042		17	17	17	39.6	39.6	39.6	67.941	0	208.1	5060200000	46	Q8BMF4	Q8BMF4	Dihydrolipoyllysine-residue acetyltransferase component of pyruvate dehydrogenase complex, mitochondrial	Dlat
26.2549	27.2029	27.0423	26.3586	25.654	26.8545	26.5304	26.1621		3	3	1	36.1	36.1	18.1	16.46	0	22.378	1027300000	9	Q8BMJ3;J3QNT6	Q8BMJ3;J3QNT6	Eukaryotic translation initiation factor 1A, X-chromosomal	Eif1ax;Gm5039
31.0841	31.8108	29.9094	27.7585	31.0564	31.4269	30.644	29.1289		55	55	55	75.8	75.8	75.8	63.691	0	323.31	31143000000	149	Q8BMK4	Q8BMK4	Cytoskeleton-associated protein 4	Ckap4
29.406	28.3313	28.0167	30.233	31.6049	30.7642	29.1605	30.865		47	47	47	73.8	73.8	73.8	82.669	0	323.31	21289000000	140	Q8BMS1	Q8BMS1	Trifunctional enzyme subunit alpha, mitochondrial;Long-chain enoyl-CoA hydratase;Long chain 3-hydroxyacyl-CoA dehydrogenase	Hadha
25.6868	NaN	27.499	NaN	28.442	30.2397	29.7135	29.2886		11	11	11	48.4	48.4	48.4	17.779	0	46.264	9763300000	34	Q8BP67	Q8BP67	60S ribosomal protein L24	Rpl24
27.4381	NaN	28.3831	28.0184	28.1837	28.1739	26.8509	27.2667		12	12	12	50.6	50.6	50.6	37.27	0	323.31	3562600000	28	Q8BP92	Q8BP92	Reticulocalbin-2	Rcn2
25.5598	26.2463	26.0613	25.7252	25.7429	25.8341	25.7172	25.4225		6	6	6	19.2	19.2	19.2	34.737	0	18.609	774560000	8	Q8BPG6	Q8BPG6	Sulfatase-modifying factor 2	Sumf2
26.4801	NaN	NaN	NaN	27.6006	27.2187	26.847	26.3005		8	8	8	31.4	31.4	31.4	28.093	0	27.578	1650300000	17	Q8BQ47;D3Z0T5	Q8BQ47;D3Z0T5	Protein canopy homolog 4	Cnpy4
25.9162	NaN	25.9721	NaN	26.4029	26.495	26.4499	25.7102		10	10	10	23	23	23	72.322	0	71.331	1031900000	15	Q8BRF7;Q8BRF7-3;A0A1W2P6R7;Q8BRF7-2	Q8BRF7;Q8BRF7-3	Sec1 family domain-containing protein 1	Scfd1
27.7725	28.4896	28.0195	27.7912	27.1417	27.7816	27.32	26.7904		7	7	7	11.6	11.6	11.6	45.58	0	13.945	3273200000	18	Q8BU14	Q8BU14	Translocation protein SEC62	Sec62
25.7601	NaN	26.0563	NaN	26.0271	25.2322	25.7368	25.6199		9	9	9	9.9	9.9	9.9	144.27	0	21.347	704600000	10	Q8BU30;F6Q6R1	Q8BU30	Isoleucine--tRNA ligase, cytoplasmic	Iars
25.8673	26.0982	26.0342	26.1525	28.0948	28.0967	26.406	28.2049		14	14	14	46.9	46.9	46.9	41.829	0	178.04	2495600000	32	Q8BWT1	Q8BWT1	3-ketoacyl-CoA thiolase, mitochondrial	Acaa2
26.3857	26.1703	27.0611	NaN	26.5841	26.1218	26.5718	26.948		12	12	12	17.6	17.6	17.6	90.244	0	56.807	1229200000	15	Q8BX02;Q8BX02-2;E9Q238	Q8BX02;Q8BX02-2	KN motif and ankyrin repeat domain-containing protein 2	Kank2
NaN	NaN	NaN	NaN	24.6524	24.831	24.9211	NaN		5	5	5	2.4	2.4	2.4	415.3	0	32.805	264380000	5	Q8BX70-3;Q8BX70;Q8BX70-2;A0A1L1SUY8;A0A1L1SSJ3;A0A1L1SS63	Q8BX70-3;Q8BX70;Q8BX70-2	Vacuolar protein sorting-associated protein 13C	Vps13c
26.5996	NaN	27.0563	26.8252	26.0594	25.0173	26.1337	26.0102		3	3	3	7.7	7.7	7.7	79.923	0	4.3118	905170000	7	Q8BY89-2;Q8BY89;A0A1L1SVG6;A0A1L1SU40	Q8BY89-2;Q8BY89;A0A1L1SVG6	Choline transporter-like protein 2	Slc44a2
26.1613	NaN	25.8487	NaN	25.9423	26.139	26.4235	25.9555		6	6	6	15.3	15.3	15.3	46.379	0	10.544	917610000	13	Q8BYB9	Q8BYB9	Protein O-glucosyltransferase 1	Poglut1
NaN	NaN	NaN	NaN	NaN	23.9646	24.6642	24.3625		3	3	3	6.2	6.2	6.2	55.871	0	5.283	167210000	4	Q8BYI6-2;Q8BYI6;Q8BYI6-3	Q8BYI6-2;Q8BYI6;Q8BYI6-3	Lysophosphatidylcholine acyltransferase 2	Lpcat2
NaN	27.1216	26.4262	NaN	NaN	26.4932	25.7209	25.7217		7	7	2	16.9	16.9	7.7	63.961	0	17.648	950250000	10	Q8BYK6;Q8BYK6-2;Q8BYK6-3	Q8BYK6;Q8BYK6-2;Q8BYK6-3	YTH domain-containing family protein 3	Ythdf3
26.2536	27.2905	26.1027	25.7868	25.5922	26.5838	26.8007	25.3591		9	9	9	23.9	23.9	23.9	54.495	0	22.767	1218500000	15	Q8BYU6	Q8BYU6	Torsin-1A-interacting protein 2	Tor1aip2
27.9264	28.031	28.3229	28.094	27.506	28.2089	28.3966	28.063		14	14	14	29.4	29.4	29.4	61.445	0	59.466	3679600000	41	Q8BYW9;D3Z459;D3YWW8;D3Z5Q3;A0A0N4SVY8	Q8BYW9	EGF domain-specific O-linked N-acetylglucosamine transferase	Eogt
27.0663	26.3933	26.6096	NaN	27.0919	27.3365	27.1526	26.3769		14	14	14	16.2	16.2	16.2	117.3	0	28.047	1611200000	18	Q8C129	Q8C129	Leucyl-cystinyl aminopeptidase	Lnpep
28.2054	25.2249	26.7955	26.158	29.2749	30.4061	27.5799	28.8286		17	17	2	54.7	54.7	7.7	30.255	0	126.47	7162300000	41	Q8C2Q8;Q91VR2;A2AKV2;A2AKV3;A2AKV1;A2AKV0	Q8C2Q8;Q91VR2;A2AKV2;A2AKV3;A2AKV1	ATP synthase subunit gamma;ATP synthase subunit gamma, mitochondrial	Atp5c1
27.393	26.9528	28.4371	28.0609	26.8965	27.4265	27.6627	27.3031		12	12	12	38.7	38.7	38.7	55.262	0	93.662	2928300000	30	Q8C522;A0A1L1SSA0	Q8C522	Endonuclease domain-containing 1 protein	Endod1
NaN	NaN	NaN	NaN	24.655	24.5327	NaN	24.4422		2	2	2	8.7	8.7	8.7	54.874	0	14.956	194010000	4	Q8C7K6;A0A0A6YY26	Q8C7K6;A0A0A6YY26	Prenylcysteine oxidase-like	Pcyox1l
25.3051	NaN	NaN	25.8179	28.575	28.8564	27.6099	27.183		17	17	17	24	24	24	111.56	0	127.66	3244100000	33	Z4YJW0;Q8C7X2-2;Q8C7X2;Q8C7X2-3;A0A1Y7VP81	Z4YJW0;Q8C7X2-2;Q8C7X2	ER membrane protein complex subunit 1	Emc1
26.6328	NaN	26.3894	NaN	26.1235	25.4364	25.6447	26.1617		8	8	7	11	11	9.9	108.54	0	15.139	781840000	13	Q8C8U0;Q8C8U0-3;Q8C8U0-2;F7CUU8	Q8C8U0;Q8C8U0-3;Q8C8U0-2	Liprin-beta-1	Ppfibp1
29.7894	30.0561	28.7545	29.4005	29.2348	29.5014	28.1746	28.7593		37	37	37	57.4	57.4	57.4	82.928	0	192.25	10237000000	92	Q8CAQ8-2;Q8CAQ8;Q8CAQ8-5;E9Q800;Q8CAQ8-3;E9QAY6;A0A0U1RP81;A0A0U1RQ14;A0A1B0GX08;E9PVS5;Q8CAQ8-4	Q8CAQ8-2;Q8CAQ8;Q8CAQ8-5;E9Q800;Q8CAQ8-3;E9QAY6;A0A0U1RP81	MICOS complex subunit Mic60	Immt
24.249	NaN	24.4256	23.794	24.1331	23.8989	NaN	NaN		2	2	2	4.9	4.9	4.9	50.962	0.002009	2.4462	169820000	5	Q8CBQ5-2;Q8CBQ5	Q8CBQ5-2;Q8CBQ5	Phosphatidylinositol 4-kinase type 2-beta	Pi4k2b
27.1169	24.909	25.3371	25.3919	26.0469	25.6713	25.6946	25.4295		9	9	9	10.4	10.4	10.4	116.18	0	23.504	786000000	13	Q8CC88-2;Q8CC88	Q8CC88-2;Q8CC88	von Willebrand factor A domain-containing protein 8	Vwa8
NaN	NaN	NaN	NaN	25.7573	25.2123	25.1438	NaN		2	2	2	19.2	19.2	19.2	10.678	0	32.049	345750000	4	Q8CF66	Q8CF66	Ragulator complex protein LAMTOR4;Ragulator complex protein LAMTOR4, N-terminally processed	Lamtor4
27.7394	26.477	27.4683	26.1654	27.9136	28.2091	27.1959	26.7552		24	24	24	24.8	24.8	24.8	170.08	0	105.42	2871100000	36	Q8CGC7;A0A0A6YWH3;A0A0A6YWA4	Q8CGC7	Bifunctional glutamate/proline--tRNA ligase;Glutamate--tRNA ligase;Proline--tRNA ligase	Eprs
27.3919	27.7607	26.8747	27.1548	28.765	28.6854	27.983	28.292		34	34	34	44.2	44.2	44.2	105.84	0	146.34	4591100000	54	Q8CGK3	Q8CGK3	Lon protease homolog, mitochondrial	Lonp1
25.0246	NaN	NaN	25.1178	25.3112	24.6053	NaN	24.9408		6	6	6	16.2	16.2	16.2	61.84	0	15.487	392000000	6	Q8CHT0	Q8CHT0	Delta-1-pyrroline-5-carboxylate dehydrogenase, mitochondrial	Aldh4a1
27.9123	29.3496	28.1172	29.0839	27.3488	28.4496	27.4515	27.905		20	20	20	43.5	43.5	43.5	63.299	0	62.329	5554400000	38	Q8CI51;D9J2Z9;D9J300;D9J301;D9J302;Q8CI51-2;A0A0G2JEJ0;Q9CRA2;A0A0G2JGZ5;D9J303;F8WJI6;E9Q8P5;Q8CI51-3	Q8CI51;D9J2Z9;D9J300;D9J301;D9J302;Q8CI51-2	PDZ and LIM domain protein 5	Pdlim5
NaN	NaN	NaN	NaN	24.9144	NaN	24.9536	24.9702		3	3	3	5.1	5.1	5.1	96.729	0	4.2028	160780000	4	Q8CI94;E9PUM3;Q3UEJ6;Q9WUB3;Q9ET01	Q8CI94	Glycogen phosphorylase, brain form	Pygb
29.5194	28.4507	29.2688	29.6961	29.4856	28.5771	28.7286	29.2217		30	30	30	56.8	56.8	56.8	77.8	0	323.31	8898600000	80	Q8CIB5;A6X940;A6X941;A0A2I3BPQ7	Q8CIB5	Fermitin family homolog 2	Fermt2
NaN	NaN	NaN	NaN	24.2196	25.1159	24.9286	NaN		4	4	4	6.7	6.7	6.7	97.303	0	15.63	315340000	2	Q8CJG0;H3BJ70;A0A6I8MX18;Q8CJG1;Q8CJF9;A3KFX6;Q8CJF8-2;Q8CJF8	Q8CJG0;H3BJ70;A0A6I8MX18;Q8CJG1;Q8CJF9	Protein argonaute-2;Protein argonaute-1;Protein argonaute-3	Ago2;Ago1;Ago3
NaN	26.1503	26.2169	NaN	25.0931	26.3534	26.6227	25.2988		10	10	10	14.1	14.1	14.1	85.652	0	31.054	967490000	14	Q8JZN2;Q91W50;A0A0G2JF72;A0A0G2JDJ7;A0A0G2JE62	Q8JZN2;Q91W50;A0A0G2JF72	Cold shock domain-containing protein E1	Csde1
NaN	NaN	NaN	NaN	26.5764	25.8327	NaN	26.0555		6	6	6	15.7	15.7	15.7	68.721	0	56.274	537120000	6	Q8JZN5;A0A0G2JDY4	Q8JZN5	Acyl-CoA dehydrogenase family member 9, mitochondrial	Acad9
24.8692	26.1278	NaN	NaN	26.2374	25.822	25	25.4569		6	6	5	9.2	9.2	8.2	89.518	0	11.548	601570000	10	Q8JZQ2	Q8JZQ2	AFG3-like protein 2	Afg3l2
25.8988	NaN	27.7413	26.0954	26.4687	27.6992	26.8359	26.0466		18	18	18	33	33	33	91.369	0	78.765	1728400000	18	Q8JZQ9	Q8JZQ9	Eukaryotic translation initiation factor 3 subunit B	Eif3b
26.1535	25.2056	25.8186	25.2608	NaN	25.1306	25.4256	25.1147		5	4	4	11.7	10.4	10.4	76.205	0	8.6042	583010000	6	Q8JZR0;A0A286YCG4	Q8JZR0	Long-chain-fatty-acid--CoA ligase 5	Acsl5
27.0001	25.0429	25.9193	25.421	26.8637	27.848	25.9664	26.9516		11	11	11	33.4	33.4	33.4	33.931	0	21.761	1564500000	19	Q8JZU2;F6VVY4	Q8JZU2	Tricarboxylate transport protein, mitochondrial	Slc25a1
25.425	27.2019	26.5428	NaN	26.2856	27.3319	26.7483	26.4476		10	10	10	20.3	20.3	20.3	56.775	0	32.297	1643100000	15	Q8K0C4	Q8K0C4	Lanosterol 14-alpha demethylase	Cyp51a1
NaN	NaN	NaN	NaN	26.0022	25.0884	NaN	25.0766		4	4	4	8.7	8.7	8.7	83.549	0	8.61	352380000	5	Q8K0D5	Q8K0D5	Elongation factor G, mitochondrial	Gfm1
NaN	NaN	NaN	NaN	24.7901	NaN	24.4764	24.3604		2	2	2	8.5	8.5	8.5	53.872	0	7.6652	153080000	6	Q8K124	Q8K124	Pleckstrin homology domain-containing family O member 2	Plekho2
NaN	NaN	NaN	NaN	25.8014	25.9439	25.7229	NaN		3	3	3	21.4	21.4	21.4	14.677	0	31.149	511920000	6	Q8K273	Q8K273	Membrane magnesium transporter 1	Mmgt1
28.1064	27.7129	27.2161	26.6195	28.9582	28.6008	27.9449	26.9672		21	21	21	45.7	45.7	45.7	71.06	0	67.851	4131500000	40	Q8K297	Q8K297	Procollagen galactosyltransferase 1	Colgalt1
26.485	NaN	26.2133	26.9996	26.0573	26.0696	26.1754	26.6863		8	8	8	24	24	24	34.47	0	13.444	1080200000	11	Q8K2A1;Q8K2A1-2;E0CXC5	Q8K2A1;Q8K2A1-2;E0CXC5	PTB domain-containing engulfment adapter protein 1	Gulp1
29.2588	27.2788	28.2	27.61	29.0365	29.2824	28.4162	28.4155		24	24	24	39.2	39.2	39.2	72.585	0	146.87	6655900000	54	Q8K2B3;A0A1Y7VJ55	Q8K2B3	Succinate dehydrogenase [ubiquinone] flavoprotein subunit, mitochondrial	Sdha
26.5339	NaN	27.1197	NaN	26.3608	26.2249	26.1378	26.2346		4	4	4	15.2	15.2	15.2	43.131	0	38.419	1208300000	11	Q8K2C9	Q8K2C9	Very-long-chain (3R)-3-hydroxyacyl-CoA dehydratase 3	Hacd3
NaN	NaN	NaN	NaN	25.1831	25.2811	NaN	24.0799		2	2	2	12.7	12.7	12.7	24.038	0	12.66	262210000	5	Q8K3J1;A0A494BAW8	Q8K3J1;A0A494BAW8	NADH dehydrogenase [ubiquinone] iron-sulfur protein 8, mitochondrial	Ndufs8
27.81	27.3925	26.6403	27.161	28.4658	27.621	26.3704	26.6663		12	12	12	21	21	21	112.84	0	142.69	2625000000	24	Q8K411-3;Q8K411-2;Q8K411	Q8K411-3;Q8K411-2;Q8K411	Presequence protease, mitochondrial	Pitrm1
26.3488	26.2245	26.2297	26.9605	26.6016	26.4008	26.3795	26.235		6	6	6	35.8	35.8	35.8	30.972	0	20.935	1215100000	14	Q8K4Z3	Q8K4Z3	NAD(P)H-hydrate epimerase	Apoa1bp
28.5804	26.9461	26.8198	26.599	29.4258	29.5856	27.6824	28.7004		18	18	18	45.8	45.8	45.8	44.816	0	96.714	6529200000	39	Q8QZT1	Q8QZT1	Acetyl-CoA acetyltransferase, mitochondrial	Acat1
26.1503	NaN	26.0815	26.4799	26.2498	26.8186	26.7548	26.1844		6	6	6	14.2	14.2	14.2	66.612	0	32.306	1289300000	12	Q8QZY1	Q8QZY1	Eukaryotic translation initiation factor 3 subunit L	Eif3l
30.0766	29.386	30.1276	30.0346	29.3414	29.079	29.0279	29.3003		14	14	12	69.2	69.2	59.2	23.776	0	87.067	9292900000	59	Q8QZZ8;A0A140LHK2;E9QLQ7;Q91YQ1	Q8QZZ8;A0A140LHK2	Ras-related protein Rab-38	Rab38
NaN	NaN	NaN	NaN	25.9233	24.7159	NaN	25.795		5	5	5	12.1	12.1	12.1	68.526	0	26.342	337640000	8	Q8R050-2;Q8R050;Q149F3;F7CE88	Q8R050-2;Q8R050;Q149F3	Eukaryotic peptide chain release factor GTP-binding subunit ERF3A;Eukaryotic peptide chain release factor GTP-binding subunit ERF3B	Gspt1;Gspt2
28.6714	27.4002	28.8591	28.5715	29.024	29.8388	29.8943	28.7999		27	27	27	49.6	49.6	49.6	63.676	0	180.59	9355700000	59	Q8R0X7;D6REF7;D3YZT4;D3YY13;D3Z1Z3	Q8R0X7;D6REF7	Sphingosine-1-phosphate lyase 1	Sgpl1
26.5416	NaN	27.7931	NaN	26.8749	26.6675	26.6682	25.9017		8	8	8	29.6	29.6	29.6	47.129	0	152.09	1500100000	14	Q8R127;J3QNN5	Q8R127;J3QNN5	Saccharopine dehydrogenase-like oxidoreductase	Sccpdh
29.3277	28.6024	29.3703	28.1893	29.0457	28.8802	29.3373	27.7729		21	21	21	56.5	56.5	56.5	54.084	0	175.38	7026800000	52	Q8R180;A0A2I3BPM1;A0A1Y7VJM4;A0A1Y7VNF4;Q8R2E9	Q8R180	ERO1-like protein alpha	Ero1l
25.7406	25.3351	NaN	NaN	26.0423	27.2631	27.2742	26.0171		15	15	15	21.1	21.1	21.1	105.53	0	58.009	1404300000	24	Q8R1B4;M0QWV3	Q8R1B4	Eukaryotic translation initiation factor 3 subunit C	Eif3c
27.5688	27.1403	27.6566	27.5102	28.4237	27.3629	28.3091	28.2961		19	19	19	31.6	31.6	31.6	84.818	0	95.322	2999000000	40	Q8R1F1;A2ARS6	Q8R1F1	Niban-like protein 1	Fam129b
26.1659	27.4485	26.7946	26.1232	26.3457	26.5134	26.4754	26.1415		10	10	9	44.5	44.5	44.5	26.022	0	48.789	1435600000	12	Q8R1V4;Q5SVW9	Q8R1V4;Q5SVW9	Transmembrane emp24 domain-containing protein 4	Tmed4
25.7186	NaN	25.0437	NaN	26.4565	26.0329	25.5121	25.6629		5	5	5	41.2	41.2	41.2	17.156	0	15.211	740010000	9	Q8R2K3;Q9CYR0;D3Z3Y3	Q8R2K3;Q9CYR0	Single-stranded DNA-binding protein;Single-stranded DNA-binding protein, mitochondrial	Ssbp1
28.7193	NaN	27.7695	26.7548	28.6087	28.5436	28.7884	27.4088		7	7	7	19.2	19.2	19.2	19.152	0	58.681	4575000000	21	Q8R2Q8	Q8R2Q8	Bone marrow stromal antigen 2	Bst2
25.0874	NaN	24.9144	NaN	25.1801	25.1801	25.3757	25.3582		6	6	6	25.3	25.3	25.3	32.788	0	11.307	485230000	9	Q8R2Y0-2;Q8R2Y0	Q8R2Y0-2;Q8R2Y0	Monoacylglycerol lipase ABHD6	Abhd6
30.0691	29.2418	29.4602	30.2799	31.1119	30.0752	29.9799	30.2852		24	24	24	33.8	33.8	33.8	71.545	0	220.79	16083000000	98	Q8R2Y2;Q8R2Y2-2;A0A1L1SQC5;F7ATH5	Q8R2Y2;Q8R2Y2-2	Cell surface glycoprotein MUC18	Mcam
24.4702	25.28	NaN	25.0916	24.8169	24.8407	24.9754	24.7893		4	4	4	5	5	5	110.22	0	21.822	386800000	5	Q8R307	Q8R307	Vacuolar protein sorting-associated protein 18 homolog	Vps18
NaN	NaN	NaN	NaN	26.3052	25.6619	NaN	25.8796		2	2	2	40.3	40.3	40.3	13.373	0	28.87	421940000	5	Q8R404	Q8R404	Protein QIL1	Qil1
NaN	NaN	NaN	NaN	23.8359	NaN	24.2179	24.0697		2	2	2	6.4	6.4	6.4	42.723	0.002004	2.4076	104520000	2	Q8R464	Q8R464	Cell adhesion molecule 4	Cadm4
27.5866	NaN	NaN	26.0995	27.9838	27.504	26.9247	26.6196		4	4	4	24	24	24	31.025	0	32.844	1994300000	12	Q8R5L1;O35658	Q8R5L1;O35658	Complement component 1 Q subcomponent-binding protein, mitochondrial	C1qbp
25.8923	NaN	26.2104	26.0007	25.525	25.4524	25.7986	25.2704		3	3	3	7.7	7.7	7.7	75.29	0	26.843	674210000	8	Q8VBZ3	Q8VBZ3	Cleft lip and palate transmembrane protein 1 homolog	Clptm1
NaN	25.091	25.777	26.0003	25.0351	24.8605	24.9053	25.3821		3	3	3	6.2	6.2	6.2	60.112	0	11.014	503030000	7	Q8VCH6	Q8VCH6	Delta(24)-sterol reductase	Dhcr24
27.3948	26.1632	26.5222	26.6396	27.8018	28.0258	26.7843	27.0305		15	15	15	33.7	33.7	33.7	67.95	0	211.18	2433100000	24	Q8VCW8	Q8VCW8	Acyl-CoA synthetase family member 2, mitochondrial	Acsf2
25.8008	NaN	26.0666	NaN	25.806	25.2717	26.0772	25.7348		8	8	7	13.6	13.6	12.3	115.2	0	64.869	702710000	13	Q8VD75;A0A0J9YUA3;A0A1D5RMM7;A0A0J9YV08;A0A0G2JFU3	Q8VD75;A0A0J9YUA3	Huntingtin-interacting protein 1	Hip1
33.412	31.9374	33.0188	33.6884	33.2757	32.0285	32.6272	33.2524		174	174	148	70.3	70.3	61.6	226.37	0	323.31	108350000000	617	Q8VDD5;A0A2R8VKI5;F2Z494;A0A2R8W6V7;Q8BXF2;E9Q264;B1AR69;G3UW82;Q91Z83;P13542;Q02566;Q5SX39;A2AQP0;Q5SX40	Q8VDD5	Myosin-9	Myh9
27.9121	29.9636	29.7699	29.1281	29.3219	30.8593	30.5043	29.413		74	74	74	64.7	64.7	64.7	141.74	0	323.31	18459000000	150	Q8VDJ3;A0A087WP83;A0A087WS92;A0A087WQY9;A0A087WPC5;A0A087WPH2	Q8VDJ3;A0A087WP83	Vigilin	Hdlbp
32.5904	31.7424	32.6173	33.1162	32.325	31.4917	32.2606	32.8632		63	63	53	49.3	49.3	38.7	112.98	0	323.31	74146000000	306	Q8VDN2;D3YYN7;Q6PIE5;A0A0G2JGX4;Q8VCE0;Q6PIC6;Q91WH7;E9QNX7;Q64436	Q8VDN2	Sodium/potassium-transporting ATPase subunit alpha-1	Atp1a1
NaN	NaN	NaN	NaN	23.1406	23.2839	23.2309	NaN		2	2	2	6.1	6.1	6.1	38.152	0.002003	2.4066	81720000	2	Q8VE91-3;Q8VE91-2;Q8VE91-1;Q8VE91;A0A2I3BQZ7	Q8VE91-3;Q8VE91-2;Q8VE91-1;Q8VE91;A0A2I3BQZ7	Protein FAM134B	Fam134b
28.4675	28.2091	28.4993	27.8086	28.0661	28.8373	28.3398	27.7744		12	12	6	59.7	59.7	40.3	21.39	0	131.45	5774200000	44	Q8VEH3;F6QKK2	Q8VEH3;F6QKK2	ADP-ribosylation factor-like protein 8A	Arl8a
NaN	26.2332	25.5684	25.4922	26.0071	29.5176	27.6084	26.793		23	23	23	30.1	30.1	30.1	86.805	0	121	3906500000	34	Q8VEK3-2;Q8VEK3	Q8VEK3-2;Q8VEK3	Heterogeneous nuclear ribonucleoprotein U	Hnrnpu
24.8819	24.8594	NaN	24.8986	28.331	30.0242	26.443	27.1487		10	10	10	32.5	32.5	32.5	39.632	0	239.08	4353600000	19	Q8VEM8;G5E902	Q8VEM8;G5E902	Phosphate carrier protein, mitochondrial	Slc25a3
NaN	NaN	25.5163	NaN	26.4288	26.5803	25.8121	25.5294		10	10	10	14.9	14.9	14.9	87.869	0	52.766	933750000	15	Q8VHE0	Q8VHE0	Translocation protein SEC63 homolog	Sec63
29.0047	29.007	29.1254	28.3201	28.6493	28.8964	28.7142	28.1605		17	17	17	73	73	73	23.897	0	75.098	6521300000	57	Q91V41;Q50HX3;A0A2R8VHW9	Q91V41;Q50HX3	Ras-related protein Rab-14	Rab14
28.2128	29.8143	30.4056	29.2199	28.7642	30.6736	30.8237	29.4829		20	20	20	77.9	77.9	77.9	22.876	0	323.31	16879000000	56	Q91V55;D3YYM6;D3Z1S8;P97461	Q91V55;D3YYM6;D3Z1S8;P97461	40S ribosomal protein S5;40S ribosomal protein S5, N-terminally processed	Rps5
25.9769	25.9496	NaN	25.4741	27.6905	28.0668	25.8996	25.9251		15	15	15	46.9	46.9	46.9	42.194	0	66.143	1852300000	23	Q91VA7;A0A668KL51;V9GXV0	Q91VA7;A0A668KL51	Isocitrate dehydrogenase [NAD] subunit, mitochondrial	Idh3b
28.2074	28.2695	27.0233	27.3756	27.3642	26.8149	25.966	26.1234		18	18	18	33.7	33.7	33.7	79.776	0	102.97	2245800000	27	Q91VD9;A0A087WQ77;A0A087WQR0;A0A087WP77;A0A087WSU3;A0A087WR47	Q91VD9	NADH-ubiquinone oxidoreductase 75 kDa subunit, mitochondrial	Ndufs1
26.4108	26.4274	26.5262	NaN	26.2563	25.8545	26.1836	26.0178		7	7	7	14.6	14.6	14.6	72.318	0	28.186	1016800000	15	Q91VE0	Q91VE0	Long-chain fatty acid transport protein 4	Slc27a4
25.7678	NaN	24.2305	NaN	NaN	25.6462	25.386	26.7266		4	4	4	20.8	20.8	20.8	30.482	0	29.535	758200000	11	Q91VK4;A0A087WRM2	Q91VK4;A0A087WRM2	Integral membrane protein 2C;CT-BRI3	Itm2c
24.3438	NaN	25.448	NaN	25.5452	28.3689	27.4219	26.1401		16	16	16	34.7	34.7	34.7	82.499	0	81.778	2156200000	25	Q91VR5;A0A1Y7VM48	Q91VR5	ATP-dependent RNA helicase DDX1	Ddx1
26.3548	NaN	25.7599	NaN	26.158	27.0604	26.7623	26.2028		11	11	11	36.9	36.9	36.9	39.832	0	38.799	1325100000	17	Q91WK2	Q91WK2	Eukaryotic translation initiation factor 3 subunit H	Eif3h
NaN	26.9274	26.3937	26.5573	26.601	26.2143	25.5882	26.0659		6	6	6	72.2	72.2	72.2	12.097	0	32.257	1171800000	15	Q91WS0	Q91WS0	CDGSH iron-sulfur domain-containing protein 1	Cisd1
NaN	NaN	NaN	NaN	23.9517	24.6149	NaN	23.7343		3	3	3	9.8	9.8	9.8	45.717	0	15.23	174060000	3	Q91XD7	Q91XD7	Cysteine-rich with EGF-like domain protein 1	Creld1
27.4916	26.4589	26.4498	27.1742	26.3871	27.046	27.0637	26.2912		8	8	8	65	65	65	22.086	0	14.28	1707500000	17	Q91XV3	Q91XV3	Brain acid soluble protein 1	Basp1
31.218	30.9991	31.3634	30.7142	30.7411	31.6753	31.471	30.8648		55	55	55	76.5	76.5	76.5	68.527	0	323.31	40039000000	175	Q91YQ5;A0A0N4SUJ8	Q91YQ5	Dolichyl-diphosphooligosaccharide--protein glycosyltransferase subunit 1	Rpn1
25.5711	25.5345	25.5266	NaN	26.4942	25.3941	26.0408	26.6263		6	6	6	30.6	30.6	30.6	40.079	0	26.062	778090000	15	Q91YR1;D3Z2H0	Q91YR1	Twinfilin-1	Twf1
28.2742	29.0622	29.5718	27.9777	29.277	29.7518	28.7907	28.6619		32	32	32	61.9	61.9	61.9	57.463	0	323.31	9413400000	67	Q91YW3	Q91YW3	DnaJ homolog subfamily C member 3	Dnajc3
27.6946	NaN	26.9505	26.9266	27.9254	29.683	28.8711	29.5507		14	14	14	48.1	48.1	48.1	41.498	0	152.92	6494000000	41	Q91Z25;Q9WV32;F6VVE6;F6THG2;D3Z6S0;A0A0G2JF52;Q9R0Q6	Q91Z25;Q9WV32	Actin-related protein 2/3 complex subunit 1B	Arpc1b
29.485	26.7066	28.5637	29.0547	29.0862	28.1427	28.8791	29.5173		21	21	21	48.6	48.6	48.6	56.979	0	300.24	6131800000	50	Q91ZJ5;Q91ZJ5-2	Q91ZJ5;Q91ZJ5-2	UTP--glucose-1-phosphate uridylyltransferase	Ugp2
30.8831	30.8101	30.9113	30.138	30.3274	30.5706	30.4221	29.7259		20	20	20	44.7	44.7	44.7	50.964	0	268.05	25419000000	91	Q920A5	Q920A5	Retinoid-inducible serine carboxypeptidase	Scpep1
27.868	27.4109	27.9203	27.5678	29.6555	30.3019	29.4947	29.6385		23	23	23	70.5	70.5	70.5	43.953	0	323.31	10777000000	82	Q921H8;H3BKL5;Q8VCH0;H3BJZ9;H3BKA1;H3BJC1;H3BJG8	Q921H8;H3BKL5;Q8VCH0;H3BJZ9	3-ketoacyl-CoA thiolase A, peroxisomal;3-ketoacyl-CoA thiolase B, peroxisomal	Acaa1a;Acaa1b
NaN	NaN	NaN	NaN	25.1553	25.2329	24.9706	NaN		4	4	4	13	13	13	59.266	0	91.527	285230000	5	Q921X9	Q921X9	Protein disulfide-isomerase A5	Pdia5
NaN	NaN	26.8928	NaN	26.9159	26.5983	26.7447	26.4281		13	13	13	32.7	32.7	32.7	57.147	0	26.204	1189600000	16	Q922B2;Q8BJY7	Q922B2	Aspartate--tRNA ligase, cytoplasmic	Dars
26.3045	26.8021	27.3481	26.1976	25.0074	26.7828	26.7078	26.2983		14	14	14	20.4	20.4	20.4	101.2	0	42.748	1380900000	20	Q922D8;A0A1W2P733;A0A1W2P7L5	Q922D8;A0A1W2P733	C-1-tetrahydrofolate synthase, cytoplasmic;Methylenetetrahydrofolate dehydrogenase;Methenyltetrahydrofolate cyclohydrolase;Formyltetrahydrofolate synthetase;C-1-tetrahydrofolate synthase, cytoplasmic, N-terminally processed	Mthfd1
30.2393	30.71	29.9178	29.4544	30.2949	30.1427	29.6945	29.0761		16	16	16	40.4	40.4	40.4	34.877	0	307.89	16512000000	61	Q922Q8	Q922Q8	Leucine-rich repeat-containing protein 59	Lrrc59
24.2257	24.1681	24.0666	NaN	25.2108	26.126	24.3479	24.6391		9	9	9	16.1	16.1	16.1	66.741	0	15.182	481740000	12	Q925I1;Q925I1-2;V9GWS5;H3BKI6;H3BK90	Q925I1;Q925I1-2	ATPase family AAA domain-containing protein 3	Atad3
29.1923	29.5949	29.4858	30.3276	28.6875	29.0324	29.0115	29.4083		49	49	49	31.3	31.3	31.3	215.54	0	281.93	10585000000	108	Q99104;D3YZ62;D3Z4J3;F6TDE5;B8JK05;G5E8G6;G3X9Y9;P21271;P21271-3;F6Z2S4;E9Q1F5;D6RFU0;A0A1L1SUF0;D3Z135	Q99104;D3YZ62;D3Z4J3	Unconventional myosin-Va	Myo5a
26.0832	25.4027	25.0547	25.4424	24.7828	25.4587	24.9695	24.8906		5	5	5	27.3	27.3	27.3	33.097	0	8.2972	492030000	9	Q99J99;A0A2R8VHT1;A0A2R8VHE5	Q99J99	3-mercaptopyruvate sulfurtransferase	Mpst
26.2976	NaN	NaN	NaN	26.9256	25.8874	25.1974	25.4528		7	7	7	38.5	38.5	38.5	38.384	0	100.61	828460000	14	Q99JB2;A2AG41;A2AG39;F6WI02	Q99JB2;A2AG41;A2AG39;F6WI02	Stomatin-like protein 2, mitochondrial	Stoml2
29.416	27.9073	29.4755	29.4561	29.455	28.6748	29.2615	29.2664		8	8	1	50.5	50.5	7.1	20.825	0	120.13	7945500000	40	Q99JI6;A0A1W2P777	Q99JI6	Ras-related protein Rap-1b	Rap1b
25.8082	NaN	NaN	25.5556	25.9086	26.5895	25.6188	25.8727		8	7	7	33.9	28	28	35.649	0	16.047	874580000	10	Q99JR1	Q99JR1	Sideroflexin-1	Sfxn1
NaN	NaN	26.086	26.1418	25.7851	26.2289	26.2832	25.8004		4	4	4	18.4	18.4	18.4	42.516	0	53.216	832420000	10	Q99JX4;A2A702;A2A701	Q99JX4;A2A702	Eukaryotic translation initiation factor 3 subunit M	Eif3m
29.1227	28.0916	27.2896	29.0735	29.2486	30.5295	28.1753	30.1251		23	23	23	59.2	59.2	59.2	51.386	0	323.31	10847000000	64	Q99JY0;D3YXU1	Q99JY0	Trifunctional enzyme subunit beta, mitochondrial;3-ketoacyl-CoA thiolase	Hadhb
29.0207	29.5723	29.3914	29.5064	28.3511	28.949	28.6993	29.0195		24	24	24	67.2	67.2	67.2	47.357	0	143.11	9177900000	63	Q99JY9;A0A087WRA1;A0A087WQ14;Q641P0-2;Q641P0;A0A087WPR6;A0A087WP86;A0A087WQ83;A0A087WS98	Q99JY9	Actin-related protein 3	Actr3
26.1213	NaN	26.737	26.342	26.1673	26.2421	26.7806	27.349		11	11	11	19.7	19.7	19.7	87.142	0	36.254	1415300000	18	Q99KC8;D3Z671;F6TIL5	Q99KC8	von Willebrand factor A domain-containing protein 5A	Vwa5a
26.7993	NaN	26.4424	26.6398	26.9002	27.0896	25.7082	26.5028		10	10	10	31.1	31.1	31.1	65.798	0	119.36	1864500000	15	Q99KE1;Q8BMF3	Q99KE1	NAD-dependent malic enzyme, mitochondrial	Me2
27.1447	28.3583	27.8999	26.7174	26.5339	27.1577	27.0319	26.8679		9	8	8	32.3	32.3	32.3	27.127	0	71.595	2205700000	24	Q99KF1;A0A286YDS5	Q99KF1;A0A286YDS5	Transmembrane emp24 domain-containing protein 9	Tmed9
31.3128	30.8634	30.3455	30.841	30.9795	30.8489	30.0487	30.3139		51	51	51	58.8	58.8	58.8	85.462	0	323.31	26287000000	148	Q99KI0;A0A2R8W744;A0A2R8VJW0;A0A2R8VHM8	Q99KI0	Aconitate hydratase, mitochondrial	Aco2
27.1113	26.2584	27.4488	27.9461	27.6437	27.5079	28.1582	28.0173		13	13	13	44	44	44	44.116	0	158	2831100000	31	Q99KJ8	Q99KJ8	Dynactin subunit 2	Dctn2
NaN	NaN	NaN	NaN	24.598	24.062	24.726	NaN		2	2	2	5.6	5.6	5.6	53.645	0	3.6155	207510000	4	Q99KR8	Q99KR8	Plasma alpha-L-fucosidase	Fuca2
27.8203	27.7148	27.872	28.6613	29.224	28.9377	29.2959	29.012		22	22	22	60.3	60.3	60.3	40.555	0	323.31	7357100000	52	Q99KV1;A0A338P778	Q99KV1	DnaJ homolog subfamily B member 11	Dnajb11
NaN	NaN	NaN	NaN	NaN	24.9391	24.9853	24.3488		2	2	2	6.1	6.1	6.1	67.464	0	11.91	281330000	3	Q99KW9	Q99KW9	T-cell immunomodulatory protein	Itfg1
NaN	27.5123	26.7657	NaN	27.5555	28.5137	27.8978	27.5975		17	17	17	65.8	65.8	65.8	34.005	0	158.92	3210800000	31	Q99L04	Q99L04	Dehydrogenase/reductase SDR family member 1	Dhrs1
26.7837	NaN	NaN	NaN	27.6827	27.1374	26.2042	27.4392		9	9	9	30.1	30.1	30.1	35.44	0	77.841	1691600000	24	Q99L13	Q99L13	3-hydroxyisobutyrate dehydrogenase, mitochondrial	Hibadh
25.6606	25.5266	NaN	25.8754	25.8522	24.1593	25.062	25.7694		6	6	4	11.5	11.5	9.5	58.081	0	49.02	550670000	7	Q99L88;Q99L88-2	Q99L88;Q99L88-2	Beta-1-syntrophin	Sntb1
27.4532	25.9301	27.495	25.9356	28.4231	30.2926	29.01	29.1967		16	16	16	66.7	66.7	66.7	29.884	0	206.11	7385800000	55	Q99LB2;A0A2I3BRG8;A0A2I3BPY3;Q9D2U3;A0A2I3BQ25;A0A2I3BRQ8	Q99LB2;A0A2I3BRG8;A0A2I3BPY3;Q9D2U3	Dehydrogenase/reductase SDR family member 4	Dhrs4
NaN	NaN	NaN	NaN	23.1808	23.2693	NaN	23.2748		2	2	2	2.6	2.6	2.6	101.68	0	4.149	82193000	2	Q99LB7	Q99LB7	Sarcosine dehydrogenase, mitochondrial	Sardh
29.7372	29.7517	28.2896	28.069	31.0316	29.9143	28.9168	29.616		21	21	21	70.3	70.3	70.3	35.009	0	242.42	12265000000	60	Q99LC5	Q99LC5	Electron transfer flavoprotein subunit alpha, mitochondrial	Etfa
24.9535	NaN	24.7905	NaN	NaN	25.7697	24.9152	24.7002		5	5	5	10.8	10.8	10.8	71.781	0	17.262	458890000	4	Q99LE6	Q99LE6	ATP-binding cassette sub-family F member 2	Abcf2
27.1811	26.7297	26.8538	27.1442	26.9411	27.0788	26.4403	26.5889		8	8	8	48.4	48.4	48.4	24.307	0	57.266	1976000000	15	Q99LP6	Q99LP6	GrpE protein homolog 1, mitochondrial	Grpel1
27.6058	26.9317	28.2582	27.9081	28.1123	28.744	28.7428	27.8188		22	22	22	54	54	54	45.269	0	131.01	4752400000	41	Q99LR1;Q99LR1-2;D6RFU2;D6RI21	Q99LR1;Q99LR1-2;D6RFU2	Monoacylglycerol lipase ABHD12	Abhd12
27.9475	NaN	28.0753	27.6517	28.2579	28.0539	27.7194	28.0203		7	7	7	25.9	25.9	25.9	25.485	0	35.969	3657900000	29	Q99M71;A0A1Y7VKS9;Q99M71-2	Q99M71	Mammalian ependymin-related protein 1	Epdr1
26.982	NaN	25.9242	25.6506	26.2785	26.5461	25.9859	26.0728		11	11	11	24.2	24.2	24.2	67.839	0	45.221	1150500000	15	Q99MN1;Q8R2P8	Q99MN1;Q8R2P8	Lysine--tRNA ligase	Kars
NaN	NaN	NaN	NaN	24.8447	24.7527	23.9577	NaN		5	5	5	16.5	16.5	16.5	58.408	0	32.671	331920000	5	Q99MN9;E9Q1J7;D3YZC1	Q99MN9;E9Q1J7	Propionyl-CoA carboxylase beta chain, mitochondrial	Pccb
26.1122	24.7411	NaN	NaN	28.6463	29.0794	26.7033	28.2755		10	10	10	55.6	55.6	55.6	27.273	0	212.08	3558900000	30	Q99N15;A2AFQ2;O08756	Q99N15;A2AFQ2;O08756	3-hydroxyacyl-CoA dehydrogenase type-2	Hsd17b10
26.4668	27.6449	27.8913	NaN	27.8358	28.5611	29.033	28.0704		13	13	13	18.4	18.4	18.4	126.61	0	70.584	4039400000	32	Q99P72;Q99P72-3;Q99P72-5;Q99P72-4;Q99P72-1	Q99P72;Q99P72-3	Reticulon-4	Rtn4
28.7626	28.8324	28.7974	29.3597	29.3183	29.4125	29.4396	29.1722		16	16	16	24.7	24.7	24.7	63.675	0	185.45	11884000000	66	Q99P91;Q8BVA0	Q99P91;Q8BVA0	Transmembrane glycoprotein NMB	Gpnmb
29.0299	NaN	29.4932	29.2116	29.4497	28.0028	28.924	29.535		9	9	9	62.7	62.7	62.7	23.407	0	111.93	6638700000	28	Q99PT1	Q99PT1	Rho GDP-dissociation inhibitor 1	Arhgdia
24.5777	NaN	NaN	NaN	24.3141	25.7221	24.8715	NaN		4	4	4	7.8	7.8	7.8	63.574	0	16.309	401630000	7	Q9CPN8	Q9CPN8	Insulin-like growth factor 2 mRNA-binding protein 3	Igf2bp3
28.8002	28.0777	28.0468	27.518	28.7911	28.6552	27.3839	27.0532		4	4	4	52.6	52.6	52.6	8.4689	0	26.18	4127800000	19	Q9CPQ1;A0A0G2JDA6	Q9CPQ1	Cytochrome c oxidase subunit 6C	Cox6c
NaN	NaN	NaN	NaN	25.7233	25.7419	NaN	25.3341		2	2	2	23.2	23.2	23.2	15.537	0	75.236	387180000	6	Q9CPQ3;A0A2R8VHJ4;A0A2R8VHM4	Q9CPQ3;A0A2R8VHJ4;A0A2R8VHM4	Mitochondrial import receptor subunit TOM22 homolog	Tomm22
27.1045	NaN	NaN	NaN	27.9685	28.2856	26.9884	27.7526		7	7	7	55.3	55.3	55.3	11.424	0	100.3	3040700000	24	Q9CPQ8;J3QNM7	Q9CPQ8	ATP synthase subunit g, mitochondrial	Atp5l
27.3787	NaN	27.1313	NaN	27.2886	27.382	26.9825	26.7655		6	6	6	27.1	27.1	27.1	17.982	0	19.504	2209000000	16	Q9CPT4	Q9CPT4	Myeloid-derived growth factor	Mydgf
NaN	NaN	26.9022	26.7719	27.3244	28.0015	27.4464	27.9467		5	5	5	37.1	37.1	37.1	16.288	0	18.773	2389200000	14	Q9CPW4;Q3UA72	Q9CPW4	Actin-related protein 2/3 complex subunit 5	Arpc5
29.7669	26.7613	29.6581	30.169	29.9051	29.9415	30.6811	30.9489		14	14	14	86.3	86.3	86.3	20.772	0	247.12	15878000000	50	Q9CPX4;P29391;A0A1B0GR60;P49945;A0A1B0GRH4;A0A1Y7VNT9	Q9CPX4;P29391;A0A1B0GR60;P49945	Ferritin;Ferritin light chain 1;Ferritin light chain 2	Ftl1;Ftl2
26.5651	25.7915	25.8252	26.0376	26.8552	25.6954	26.061	26.344		11	11	11	29.7	29.7	29.7	52.75	0	31.801	944280000	20	Q9CPY7-2;Q9CPY7;A0A0G2JEM7	Q9CPY7-2;Q9CPY7	Cytosol aminopeptidase	Lap3
27.9779	26.47	27.3389	26.9562	28.5865	29.5282	28.6935	28.0531		8	8	8	65.2	65.2	65.2	17.749	0	79.518	5308000000	22	Q9CQ22;A0A0A6YX02	Q9CQ22;A0A0A6YX02	Ragulator complex protein LAMTOR1	Lamtor1
27.7572	26.2194	28.1953	27.5524	28.3941	28.3846	28.0173	27.7066		12	12	12	72.5	72.5	72.5	18.904	0	68.641	3840400000	29	Q9CQ45	Q9CQ45	Neudesin	Nenf
26.6954	26.7244	NaN	26.3385	NaN	25.0108	NaN	NaN		2	2	2	11.7	11.7	11.7	14.164	0	5.5512	690890000	5	Q9CQ54	Q9CQ54	NADH dehydrogenase [ubiquinone] 1 subunit C2	Ndufc2
28.4426	28.3235	27.819	28.4058	27.7829	27.9176	27.245	27.7526		15	15	15	57	57	57	36.213	0	103.37	4052500000	31	Q9CQ62	Q9CQ62	2,4-dienoyl-CoA reductase, mitochondrial	Decr1
25.8183	25.4715	25.6926	26.1551	25.7435	24.7995	25.4302	24.6968		4	4	4	21.9	21.9	21.9	31.062	0	8.8717	503110000	8	Q9CQ65	Q9CQ65	S-methyl-5-thioadenosine phosphorylase	Mtap
25.7436	NaN	NaN	NaN	26.2764	26.2942	25.1211	25.8542		3	3	3	42.7	42.7	42.7	9.7681	0	31.01	752020000	11	Q9CQ69;I7HPX6	Q9CQ69	Cytochrome b-c1 complex subunit 8	Uqcrq
26.2743	23.9538	25.6264	26.1144	27.4283	27.8517	26.0022	27.4242		8	8	8	45.4	45.4	45.4	17.008	0	104.85	2110200000	28	Q9CQ92;G3X9U9;D3YZ32	Q9CQ92;G3X9U9	Mitochondrial fission 1 protein	Fis1
26.8714	26.3123	26.1408	26.5473	27.6498	27.47	26.3297	26.6621		8	8	8	31.2	31.2	31.2	31.814	0	28.596	2124200000	17	Q9CQA3	Q9CQA3	Succinate dehydrogenase [ubiquinone] iron-sulfur subunit, mitochondrial	Sdhb
27.3551	NaN	26.4045	26.7884	27.1054	26.5836	26.107	25.9392		6	6	6	52.3	52.3	52.3	13.561	0	15.573	1475000000	13	Q9CQB4;Q9D855	Q9CQB4;Q9D855	Cytochrome b-c1 complex subunit 7	Uqcrb
NaN	NaN	26.2018	NaN	25.8646	25.394	25.8992	NaN		3	3	3	29.6	29.6	29.6	15.242	0	19.021	516600000	5	Q9CQB5;D3Z3X4	Q9CQB5	CDGSH iron-sulfur domain-containing protein 2	Cisd2
27.6915	27.6998	26.6123	27.1556	27.0224	26.8796	25.3213	26.1749		5	5	5	53.5	53.5	53.5	15.081	0	25.699	1655700000	16	Q9CQC7	Q9CQC7	NADH dehydrogenase [ubiquinone] 1 beta subcomplex subunit 4	Ndufb4
28.2155	27.704	28.021	27.325	28.5461	28.1239	27.9654	27.6679		18	18	18	48.7	48.7	48.7	56.494	0	209.5	4029500000	47	Q9CQF9;F7CIP8;A0A0N4SWD3;D3Z275	Q9CQF9	Prenylcysteine oxidase	Pcyox1
NaN	NaN	NaN	NaN	NaN	25.7084	25.8835	25.5949		3	3	3	31	31	31	17.27	0	19.383	476220000	5	Q9CQH7	Q9CQH7	Transcription factor BTF3 homolog 4	Btf3l4
NaN	26.1574	NaN	NaN	26.2644	NaN	25.9465	26.637		6	6	6	46.5	46.5	46.5	16.723	0	47.574	938010000	8	Q9CQI3;A0A2I3BR94;A0A2I3BPS1;D3Z2F6;D3YY16;Q9ERL7	Q9CQI3;A0A2I3BR94;A0A2I3BPS1	Glia maturation factor beta	Gmfb
29.7051	28.6582	28.429	29.3944	29.4192	27.8495	28.4636	29.0631		11	11	11	80.3	80.3	80.3	15.944	0	52.836	6580000000	41	Q9CQI6;A0A1D5RLP1	Q9CQI6	Coactosin-like protein	Cotl1
26.8223	29.3386	28.0499	28.3474	28.068	29.6383	28.7539	28.5161		9	9	9	45.6	45.6	45.6	18.579	0	57.047	7104500000	40	Q9CQM8;O09167	Q9CQM8;O09167	60S ribosomal protein L21	Rpl21
27.6964	26.2062	26.0647	25.7853	27.0216	27.3254	26.4899	25.9164		15	15	15	30.6	30.6	30.6	80.208	0	111.91	1644100000	21	Q9CQN1	Q9CQN1	Heat shock protein 75 kDa, mitochondrial	Trap1
NaN	NaN	NaN	NaN	25.8511	25.7004	25.164	NaN		3	3	3	60.5	60.5	60.5	11.642	0	13.972	417490000	5	Q9CQN6	Q9CQN6	Transmembrane protein 14C	Tmem14c
29.0754	27.7125	27.9765	27.7877	29.2337	29.252	27.9621	28.3687		17	17	17	55.9	55.9	55.9	28.948	0	34.835	6253500000	31	Q9CQQ7;A0A0G2JGX3	Q9CQQ7;A0A0G2JGX3	ATP synthase F(0) complex subunit B1, mitochondrial	Atp5f1
26.4522	29.9467	28.2488	28.8211	26.1607	28.7272	28.3233	27.5475		8	8	8	72.3	72.3	72.3	9.1413	0	89.68	6965600000	42	Q9CQR2	Q9CQR2	40S ribosomal protein S21	Rps21
NaN	NaN	25.7683	NaN	26.6164	26.6849	25.0217	26.1737		7	7	7	56.4	56.4	56.4	15.183	0	26.037	886390000	12	Q9CQR4	Q9CQR4	Acyl-coenzyme A thioesterase 13;Acyl-coenzyme A thioesterase 13, N-terminally processed	Acot13
29.1414	27.896	29.1999	27.7781	28.8021	28.6072	28.3649	27.6393		11	11	11	71.8	71.8	71.8	19.048	0	272.11	5966700000	37	Q9CQU0	Q9CQU0	Thioredoxin domain-containing protein 12	Txndc12
28.3801	25.7057	27.8731	28.5632	28.4103	28.2906	28.633	28.9599		19	11	11	66	52.5	52.5	27.854	0	303.64	4808000000	40	Q9CQV8-2;Q9CQV8;A2A5N1	Q9CQV8-2;Q9CQV8;A2A5N1	14-3-3 protein beta/alpha;14-3-3 protein beta/alpha, N-terminally processed	Ywhab
26.9927	NaN	26.6095	NaN	27.5915	28.8568	27.6959	27.2956		2	2	2	30.7	30.7	30.7	14.954	0	65.772	3468500000	11	Q9CQW9	Q9CQW9	Interferon-induced transmembrane protein 3	Ifitm3
26.4305	NaN	NaN	NaN	28.287	28.7885	28.3964	28.6129		3	3	3	32.9	32.9	32.9	16.318	0	67.236	3857900000	14	Q9CQX2	Q9CQX2	Cytochrome b5 type B	Cyb5b
26.0481	NaN	NaN	26.6064	25.5946	24.5938	26.2528	26.5375		3	3	3	13.6	13.6	13.6	33.913	0	23.636	696450000	12	Q9CR26;F8WJC2;F6W5Q8	Q9CR26	Vacuolar protein sorting-associated protein VTA1 homolog	Vta1
29.1878	28.7434	30.0541	29.3879	29.5531	30.5614	30.2784	28.9356		12	12	12	43.3	43.3	43.3	23.564	0	106.69	14987000000	49	Q9CR57;A0A1L1SUF6	Q9CR57	60S ribosomal protein L14	Rpl14
NaN	NaN	NaN	NaN	24.5306	24.9462	NaN	24.3752		1	1	1	6.6	6.6	6.6	16.331	0.0056818	1.9272	221430000	2	Q9CR61	Q9CR61	NADH dehydrogenase [ubiquinone] 1 beta subcomplex subunit 7	Ndufb7
27.1159	26.48	25.6059	26.7087	28.2417	28.6772	26.1794	27.5761		15	15	15	62.1	62.1	62.1	34.155	0	203.45	2878100000	29	Q9CR62;Q5SX46;Q5SX48	Q9CR62;Q5SX46	Mitochondrial 2-oxoglutarate/malate carrier protein	Slc25a11
27.994	NaN	26.3566	26.4644	28.2896	26.6838	26.0923	26.4701		8	8	8	46	46	46	29.367	0	83.549	1837500000	20	Q9CR68	Q9CR68	Cytochrome b-c1 complex subunit Rieske, mitochondrial;Cytochrome b-c1 complex subunit 11	Uqcrfs1
NaN	NaN	NaN	NaN	NaN	24.244	22.665	22.6977		2	2	2	9.7	9.7	9.7	33.752	0	13.006	117490000	2	Q9CRA5;Q05BZ0;H3BJN5;H3BJ12;K3W4Q3;H3BJ82;H3BJ07;Q9CRA5-2;Q8R088-3;Q8R088	Q9CRA5;Q05BZ0;H3BJN5;H3BJ12;K3W4Q3;H3BJ82;H3BJ07;Q9CRA5-2;Q8R088-3;Q8R088	Golgi phosphoprotein 3;Golgi phosphoprotein 3-like	Golph3;Golph3l
28.0054	NaN	26.9942	27.7195	27.5468	27.6119	26.8991	27.2279		10	10	10	44.1	44.1	44.1	26.334	0	78.104	2528000000	25	Q9CRB9;Q9D9P1;D3Z0L4;S4R238;F6QFL0	Q9CRB9;Q9D9P1;D3Z0L4;S4R238	MICOS complex subunit Mic19	Chchd3
25.4054	25.9611	26.1669	26.5136	27.4792	27.7449	26.2856	26.7956		11	11	11	52.2	52.2	52.2	27.61	0	49.316	1844800000	22	Q9CRD0;Q9CRD0-3;Q9CRD0-2;A0A0J9YUK7;A0A0J9YUB6;A0A0J9YTV6;A0A0J9YTV7	Q9CRD0;Q9CRD0-3;Q9CRD0-2;A0A0J9YUK7;A0A0J9YUB6	OCIA domain-containing protein 1	Ociad1
27.4882	28.0416	27.2688	27.3236	27.4758	27.4739	27.1947	27.2085		9	9	9	30.6	30.6	30.6	34.934	0	26.387	2437600000	20	Q9CRD2	Q9CRD2	ER membrane protein complex subunit 2	Emc2
25.6668	NaN	NaN	26.0008	27.6051	29.3244	27.6535	28.9237		14	14	14	44.7	44.7	44.7	34.357	0	212.7	4044800000	32	Q9CVB6;D3YXG6	Q9CVB6;D3YXG6	Actin-related protein 2/3 complex subunit 2	Arpc2
NaN	NaN	NaN	NaN	24.7362	24.3167	NaN	24.7826		4	4	4	22.5	22.5	22.5	31.726	0	7.9807	186630000	5	Q9CWE0;D6RCX5;D3Z0X8;D3YW54;Q9CWE0-2	Q9CWE0;D6RCX5;D3Z0X8;D3YW54	Mitochondrial fission regulator 1-like	Mtfr1l
26.0946	NaN	NaN	NaN	26.349	24.9938	25.8242	25.9185		8	8	8	19.6	19.6	19.6	64.217	0	24.938	614090000	16	Q9CWJ9	Q9CWJ9	Bifunctional purine biosynthesis protein PURH;Phosphoribosylaminoimidazolecarboxamide formyltransferase;IMP cyclohydrolase	Atic
27.2789	27.3987	27.5938	27.2729	27.8267	27.4713	27.1054	26.9469		14	14	12	31	31	27	58.47	0	54.974	2656100000	28	Q9CWK8	Q9CWK8	Sorting nexin-2	Snx2
28.1461	26.5285	27.9855	27.9983	27.8076	27.0443	28.6985	28.6559		12	12	12	60.4	60.4	60.4	31.381	0	63.721	3295800000	38	Q9CWS0;D3YU15	Q9CWS0;D3YU15	N(G),N(G)-dimethylarginine dimethylaminohydrolase 1	Ddah1
25.0464	25.9224	25.7714	NaN	24.8858	25.7625	25.0098	24.5651		5	5	5	18.8	18.8	18.8	26.172	0	16.604	522480000	7	Q9CXE7;D3Z615;Q8C5H9;Q3V440;E9Q2J2;E9PXY3	Q9CXE7	Transmembrane emp24 domain-containing protein 5	Tmed5
NaN	NaN	NaN	25.9784	26.1147	26.0047	25.647	25.8003		9	9	9	21.1	21.1	21.1	54.614	0	15.771	903440000	10	Q9CXT8;D3Z1T9	Q9CXT8	Mitochondrial-processing peptidase subunit beta	Pmpcb
29.7247	31.4001	31.2406	30.5446	28.9413	30.5578	30.0771	29.322		15	15	15	74.7	74.7	74.7	20.252	0	74.995	19940000000	61	Q9CXW4;A2BH06	Q9CXW4;A2BH06	60S ribosomal protein L11	Rpl11
NaN	NaN	NaN	NaN	24.2481	24.4728	NaN	23.6004		2	2	2	24.2	24.2	24.2	20.52	0	7.1876	143820000	2	Q9CY16	Q9CY16	28S ribosomal protein S28, mitochondrial	Mrps28
27.9107	29.0517	29.3355	29.0869	28.5362	28.2644	28.0975	27.3709		9	9	9	20.1	20.1	20.1	36.09	0	19.941	6030200000	28	Q9CY27;G3UWE1;Q52L67;A0A5F8MQC8;A0A1D5RLH3;A0A5F8MPU6;Q3TAN8	Q9CY27;G3UWE1;Q52L67;A0A5F8MQC8	Very-long-chain enoyl-CoA reductase	Tecr
25.9167	NaN	26.292	26.0561	25.7263	26.2636	25.8643	25.802		5	5	5	20.9	20.9	20.9	38.219	0	46.793	990940000	7	Q9CYA0	Q9CYA0	Cysteine-rich with EGF-like domain protein 2	Creld2
26.128	27.9084	27.0065	24.9457	27.608	28.0404	25.7984	24.8973		15	15	15	42.2	42.2	42.2	46.169	0	59.19	2267500000	27	Q9CYD3	Q9CYD3	Cartilage-associated protein	Crtap
25.019	25.155	25.1804	25.3881	24.9316	25.336	25.1348	25.2896		7	7	7	34.3	34.3	34.3	34.28	0	46.629	622630000	8	Q9CYG7-2;Q9CYG7	Q9CYG7-2;Q9CYG7	Mitochondrial import receptor subunit TOM34	Tomm34
28.637	27.393	27.096	28.0136	29.0771	28.3353	26.5191	28.092		18	18	18	43.1	43.1	43.1	52.851	0	183.9	4459600000	41	Q9CZ13;A0A0A6YW82;A0A0A6YWX6	Q9CZ13	Cytochrome b-c1 complex subunit 1, mitochondrial	Uqcrc1
31.7281	31.4699	31.9507	31.7434	33.5602	33.1944	32.9382	34.0891		24	24	24	45.5	45.5	45.5	66.3	0	323.31	126080000000	152	Q9CZB2;Q60696;A0A1W2P7B8;A0A1W2P7H5	Q9CZB2;Q60696;A0A1W2P7B8	Melanocyte protein PMEL;M-alpha;M-beta	Pmel
26.5684	25.2995	26.7669	26.4763	26.1614	25.2591	26.0742	25.8785		5	5	5	9.9	9.9	9.9	81.877	0	17.122	862030000	16	Q9CZD3	Q9CZD3	Glycine--tRNA ligase	Gars
26.5642	NaN	26.7042	26.8294	27.071	25.3993	25.9131	25.8691		8	6	6	46.2	36.8	36.8	25.068	0	18.277	935070000	14	Q9CZE3;A0A1Y7VIZ0	Q9CZE3	Ras-related protein Rab-32	Rab32
NaN	NaN	NaN	NaN	NaN	24.6023	24.4734	24.4001		3	3	3	30.1	30.1	30.1	20.852	0	6.3354	252140000	4	Q9CZG3;A0A0G2JEX2;A0A0G2JH18	Q9CZG3	COMM domain-containing protein 8	Commd8
28.775	29.4844	29.3032	28.8653	29.5694	29.8723	29.6984	29.3372		16	16	16	49.5	49.5	49.5	24.146	0	41.522	10257000000	48	Q9CZM2;B8JKK2	Q9CZM2;B8JKK2	60S ribosomal protein L15;Ribosomal protein L15	Rpl15
29.5022	29.2401	27.996	28.2579	29.1558	29.4367	27.9598	27.6012		35	35	35	73.9	73.9	73.9	55.42	0	209.53	7473900000	64	Q9CZN7-2;Q9CZN7	Q9CZN7-2;Q9CZN7	Serine hydroxymethyltransferase	Shmt2
30.2156	28.5207	28.2637	28.478	29.8778	30.0264	28.3952	29.3513		25	25	25	59.7	59.7	59.7	51.736	0	323.31	10658000000	63	Q9CZU6;Q80X68	Q9CZU6	Citrate synthase, mitochondrial	Cs
NaN	NaN	24.993	NaN	26.2733	27.2227	26.4495	26.2301		12	12	11	25.1	25.1	22.8	80.491	0	54.936	1040400000	14	Q9CZW4;E9PUC2;D3Z4I4	Q9CZW4;E9PUC2	Long-chain-fatty-acid--CoA ligase 3	Acsl3
26.1737	25.9426	25.2255	24.1812	26.1375	27.2198	25.9252	25.9694		10	10	10	22.3	22.3	22.3	67.589	0	84.232	1290500000	16	Q9CZW5	Q9CZW5	Mitochondrial import receptor subunit TOM70	Tomm70a
26.5225	NaN	NaN	NaN	27.1381	27.6014	27.6356	27.2607		7	4	4	38.5	33.1	33.1	28.038	0	42.976	1914300000	16	Q9CZX7	Q9CZX7	Type 2 phosphatidylinositol 4,5-bisphosphate 4-phosphatase	Tmem55a
28.0342	31.267	30.8997	27.4566	27.929	30.4508	30.223	28.9811		18	18	18	84.1	84.1	84.1	16.085	0	82.891	17111000000	64	Q9CZX8;D3YUT3;D3Z722;D3Z5R8;D3YUG3;S4R223	Q9CZX8;D3YUT3;D3Z722;D3Z5R8;D3YUG3;S4R223	40S ribosomal protein S19	Rps19
NaN	25.3959	24.8459	NaN	25.0839	25.6694	24.4691	25.1232		3	3	3	31.5	31.5	31.5	14.286	0	9.1575	565000000	10	Q9D023	Q9D023	Mitochondrial pyruvate carrier 2	Mpc2
26.0256	NaN	26.2902	26.1021	26.7698	28.1434	27.1519	26.6638		14	14	14	43.2	43.2	43.2	54.865	0	131.54	2166600000	21	Q9D024-2;Q9D024;F7C265;Q9D024-3;B1AR93	Q9D024-2;Q9D024;F7C265;Q9D024-3	Coiled-coil domain-containing protein 47	Ccdc47
29.7327	28.1359	28.3548	29.0198	29.3385	29.1243	28.1239	28.8054		17	17	17	57.9	57.9	57.9	38.937	0	188.98	8250600000	54	Q9D051	Q9D051	Pyruvate dehydrogenase E1 component subunit beta, mitochondrial	Pdhb
27.8172	28.8517	28.5669	27.6437	28.8935	28.2261	28.5394	28.0094		16	16	16	31.7	31.7	31.7	57.788	0	111.37	5154200000	32	Q9D0F3;D3Z5B9	Q9D0F3	Protein ERGIC-53	Lman1
26.4206	25.7133	26.5268	26.098	26.155	26.642	26.2439	26.0966		10	10	10	19.2	19.2	19.2	75.673	0	26.232	1270100000	17	Q9D0I9	Q9D0I9	Arginine--tRNA ligase, cytoplasmic	Rars
29.7042	28.6074	27.9448	28.9273	32.1494	31.1711	30.5678	31.5811		36	36	36	70.6	70.6	70.6	55.988	0	323.31	28389000000	115	Q9D0K2;Q3UJQ9	Q9D0K2;Q3UJQ9	Succinyl-CoA:3-ketoacid coenzyme A transferase 1, mitochondrial;Succinyl-CoA:3-ketoacid-coenzyme A transferase	Oxct1
27.8345	26.3928	27.2506	27.7233	26.7407	27.244	27.3777	27.6248		6	6	2	64	64	33.7	10.35	0	14.006	2724000000	14	Q9D0M5;D6RIN4	Q9D0M5	Dynein light chain 2, cytoplasmic	Dynll2
NaN	NaN	NaN	NaN	23.6966	25.6741	NaN	23.9884		4	4	4	33.8	33.8	33.8	21.701	0	31.36	369260000	4	Q9D0R8;A0A0A0MQC9	Q9D0R8;A0A0A0MQC9	Protein LSM12 homolog	Lsm12
28.9461	29.6681	28.4515	29.6547	29.5578	29.9393	29.7782	29.2215		13	13	13	46.1	46.1	46.1	24.911	0	127.14	12100000000	52	Q9D1D4;A0A1Y7VM54;Q9D1D4-2	Q9D1D4;A0A1Y7VM54	Transmembrane emp24 domain-containing protein 10	Tmed10
27.7686	NaN	NaN	28.0274	27.5181	27.2863	27.4895	27.5685		9	9	9	85.7	85.7	85.7	13.37	0	63.799	2424200000	26	Q9D1K2;A0A0N4SVE1;F7B2B4	Q9D1K2;A0A0N4SVE1;F7B2B4	V-type proton ATPase subunit F	Atp6v1f
NaN	NaN	25.2	23.2597	25.2204	26.6079	26.5174	26.3837		5	5	5	96.7	96.7	96.7	9.6418	0	323.31	1084000000	12	Q9D1L9;G3UW70	Q9D1L9;G3UW70	Ragulator complex protein LAMTOR5	Lamtor5
28.3161	27.8576	28.2541	27.4702	28.044	29.7695	28.7832	28.0417		18	18	18	43.8	43.8	43.8	46.852	0	130.88	6318200000	40	Q9D1Q6	Q9D1Q6	Endoplasmic reticulum resident protein 44	Erp44
28.3177	30.0009	30.004	29.2647	28.0205	29.5659	29.7356	28.8894		13	13	13	49.6	49.6	49.6	13.293	0	30.101	10384000000	28	Q9D1R9;A0A0G2JEY6;A0A0G2JGY8	Q9D1R9;A0A0G2JEY6;A0A0G2JGY8	60S ribosomal protein L34	Rpl34
27.3223	NaN	NaN	NaN	27.7766	27.6402	26.5306	26.7562		7	7	7	19.4	19.4	19.4	48.994	0	51.801	2120300000	17	Q9D2G2;Q9D2G2-2	Q9D2G2;Q9D2G2-2	Dihydrolipoyllysine-residue succinyltransferase component of 2-oxoglutarate dehydrogenase complex, mitochondrial	Dlst
NaN	NaN	25.0681	25.9035	NaN	24.3274	25.045	25.5504		4	4	4	6.2	6.2	6.2	100.81	0	12.867	431350000	5	Q9D2V7;G3X9L5;E9PYU1	Q9D2V7	Coronin-7	Coro7
30.2443	30.0241	30.1386	30.1784	30.816	31.1097	31.4095	31.1248		38	38	38	73.4	73.4	73.4	52.576	0	323.31	27806000000	124	Q9D379;E9PWK1;F6YTS6;D3Z4M3	Q9D379;E9PWK1;F6YTS6	Epoxide hydrolase 1	Ephx1
28.0072	27.2951	26.6579	NaN	27.8789	27.5165	25.8131	26.6741		5	5	5	41.1	41.1	41.1	17.6	0	74.885	2319900000	11	Q9D3D9	Q9D3D9	ATP synthase subunit delta, mitochondrial	Atp5d
25.0402	NaN	NaN	25.5136	25.3943	27.3161	25.8127	25.7693		11	10	10	19.7	18.4	18.4	86.436	0	50.922	1128300000	13	Q9D662;A2ANA0;A2AN98;A2AN99;A2AN97	Q9D662	Protein transport protein Sec23B	Sec23b
NaN	NaN	NaN	NaN	26.459	25.8768	NaN	25.7707		3	3	3	31.1	31.1	31.1	16.564	0	41.525	627110000	8	Q9D6K8;Q9D9Q3	Q9D6K8	FUN14 domain-containing protein 2	Fundc2
26.4729	26.9182	NaN	26.4334	26.2269	26.7961	26.4581	25.613		5	5	5	38.8	38.8	38.8	24.148	0	31.588	1213100000	8	Q9D7B7	Q9D7B7	Probable glutathione peroxidase 8	Gpx8
25.1045	NaN	24.7142	NaN	24.8326	24.3919	NaN	24.2809		2	2	2	9.7	9.7	9.7	32.402	0	4.6944	291220000	5	Q9D7J9	Q9D7J9	Enoyl-CoA hydratase domain-containing protein 3, mitochondrial	Echdc3
26.4889	26.9821	26.3575	NaN	27.6395	27.4896	27.3749	26.6148		9	9	9	30.6	30.6	30.6	46.434	0	82.727	2013200000	14	Q9D7N9	Q9D7N9	Adipocyte plasma membrane-associated protein	Apmap
26.1525	NaN	26.6271	25.9741	24.8832	27.7755	27.5009	26.8998		4	4	4	41.3	41.3	41.3	14.339	0	138.13	1980700000	12	Q9D7S7-2;Q9D7S7	Q9D7S7-2;Q9D7S7	60S ribosomal protein L22-like 1	Rpl22l1
NaN	NaN	NaN	NaN	25.0696	25.3578	NaN	25.37		2	2	2	20.3	20.3	20.3	16.98	0	8.8431	491570000	6	Q9D898	Q9D898	Actin-related protein 2/3 complex subunit 5-like protein	Arpc5l
26.0582	NaN	26.1992	25.4321	25.5466	24.8872	26.0509	25.7135		5	5	5	31.2	31.2	31.2	24.936	0	35.847	671490000	10	Q9D8B3	Q9D8B3	Charged multivesicular body protein 4b	Chmp4b
30.0331	29.5682	29.9877	30.2445	30.0417	31.2398	31.0303	30.2404		28	28	28	54.9	54.9	54.9	47.153	0	256.05	27232000000	115	Q9D8E6	Q9D8E6	60S ribosomal protein L4	Rpl4
29.841	30.8133	30.5583	30.1681	29.1405	30.4242	30.7756	29.6756		34	34	34	73.7	73.7	73.7	50.06	0	253.12	19798000000	89	Q9D8N0	Q9D8N0	Elongation factor 1-gamma	Eef1g
NaN	NaN	NaN	26.5206	26.6826	27.2304	27.2186	27.3743		10	10	10	31.7	31.7	31.7	46.797	0	129.77	1505500000	17	Q9D8U8	Q9D8U8	Sorting nexin-5	Snx5
26.3817	NaN	26.2421	NaN	26.4255	27.2984	26.6558	26.2994		6	6	6	26.8	26.8	26.8	30.537	0	88.444	1510600000	9	Q9DAU1;Q9DAU1-2;B0V2V1	Q9DAU1;Q9DAU1-2	Protein canopy homolog 3	Cnpy3
27.1033	26.6472	26.8504	27.9859	28.3107	27.961	28.3649	28.9559		17	17	16	47.3	47.3	47.3	36.428	0	78.801	3593200000	34	Q9DAW9;A0A0G2JDV8;A0A0G2JFI6;A0A0G2JFC8;A0A0G2JFG3	Q9DAW9;A0A0G2JDV8	Calponin-3	Cnn3
28.2829	27.7005	27.7688	27.6815	28.6234	28.3789	27.7015	27.6713		18	18	18	77.6	77.6	77.6	33.189	0	80.734	4027400000	41	Q9DB05;P28663	Q9DB05	Alpha-soluble NSF attachment protein	Napa
26.5653	26.7015	26.2769	26.4887	26.7629	25.991	24.9242	25.5575		5	5	5	28.9	28.9	28.9	21.708	0	21.384	1098100000	11	Q9DB15	Q9DB15	39S ribosomal protein L12, mitochondrial	Mrpl12
30.0337	29.8447	28.8305	29.9017	29.7503	29.459	28.388	28.9495		14	14	14	70.9	70.9	70.9	23.363	0	169.04	10886000000	51	Q9DB20;A0A338P776;A0A338P7G3;F7D3P8;F6XVM5	Q9DB20;A0A338P776	ATP synthase subunit O, mitochondrial	Atp5o
NaN	NaN	NaN	NaN	25.3142	26.0034	NaN	24.7166		5	5	5	39.3	39.3	39.3	34.134	0	15.799	391020000	5	Q9DB73;G3UZG6;Q9DB73-2	Q9DB73;G3UZG6	NADH-cytochrome b5 reductase 1	Cyb5r1
28.2018	NaN	26.2582	NaN	29.0154	29.0763	27.2146	28.1391		16	16	16	58.7	58.7	58.7	48.234	0	101.69	4457600000	37	Q9DB77;A0A140LI98	Q9DB77	Cytochrome b-c1 complex subunit 2, mitochondrial	Uqcrc2
27.0465	NaN	26.9074	26.8082	26.4295	26.0153	26.548	26.3981		9	9	8	31.2	31.2	28.1	43.185	0	93.015	1186200000	20	Q9DBC7;A2AI69;D3Z4L4	Q9DBC7	cAMP-dependent protein kinase type I-alpha regulatory subunit;cAMP-dependent protein kinase type I-alpha regulatory subunit, N-terminally processed	Prkar1a
28.1062	28.5636	28.8551	28.6821	27.4859	28.3505	28.3896	27.8918		27	27	10	31.6	31.6	14.9	104.58	0	99.925	4878600000	50	Q9DBG3;Q9DBG3-2;H3BIY9;H3BKM0;H3BJ06	Q9DBG3;Q9DBG3-2;H3BIY9;H3BKM0	AP-2 complex subunit beta;AP complex subunit beta	Ap2b1
29.7966	29.3966	29.5678	28.2562	29.953	30.9536	30.2903	29.4597		22	22	22	43.1	43.1	43.1	69.062	0	323.31	16850000000	74	Q9DBG6;A2ACG7	Q9DBG6;A2ACG7	Dolichyl-diphosphooligosaccharide--protein glycosyltransferase subunit 2	Rpn2
26.746	NaN	27.2352	27.2575	28.0243	28.5039	27.4544	26.7036		16	16	16	33.2	33.2	33.2	69.622	0	141.7	3059500000	27	Q9DBG7;F6VF36;A0A1L1SSI7	Q9DBG7;F6VF36	Signal recognition particle receptor subunit alpha	Srpr
25.8795	27.175	26.5119	NaN	26.282	26.3655	25.8679	25.5838		8	8	8	35.8	35.8	35.8	40.429	0	50.176	1095900000	17	Q9DBH5	Q9DBH5	Vesicular integral-membrane protein VIP36	Lman2
29.2847	NaN	28.8159	28.8309	28.8757	27.6716	28.8081	29.2807		11	11	11	50.4	50.4	50.4	28.832	0	57.601	4887200000	29	Q9DBJ1;O70250	Q9DBJ1	Phosphoglycerate mutase 1	Pgam1
27.3286	27.9113	27.1716	26.6917	26.9099	26.854	27.0068	26.1679		10	10	10	17.3	17.3	17.3	94.525	0	46.688	1797200000	21	Q9DBN5;Q9DBN5-2;Q9DBN5-3;Q8BK80	Q9DBN5;Q9DBN5-2;Q9DBN5-3	Lon protease homolog 2, peroxisomal	Lonp2
25.8763	NaN	NaN	NaN	25.7549	25.0606	25.9116	25.9875		5	5	5	5.8	5.8	5.8	114.99	0	9.9168	624380000	10	Q9DBR7;A0A1W2P750;Q9DBR7-2;A6H644;Q8BG95	Q9DBR7;A0A1W2P750;Q9DBR7-2	Protein phosphatase 1 regulatory subunit 12A	Ppp1r12a
27.5196	28.0526	28.0221	26.9134	28.2189	27.5689	27.5231	26.9101		8	8	8	28	28	28	44.783	0	46.658	2857100000	20	Q9DBS1	Q9DBS1	Transmembrane protein 43	Tmem43
26.3543	26.628	26.0874	25.3749	26.7286	26.5216	25.8918	NaN		12	9	9	36.8	29	29	38.476	0	114.19	1148700000	12	Q9DBZ1-2	Q9DBZ1-2	Inhibitor of nuclear factor kappa-B kinase-interacting protein	Ikbip
27.2324	NaN	27.6909	26.4152	28.3769	29.4836	28.4592	27.4802		21	21	21	35.8	35.8	35.8	90.582	0	262.22	4766300000	35	Q9DC23	Q9DC23	DnaJ homolog subfamily C member 10	Dnajc10
26.6079	27.6695	26.1528	26.5929	27.4422	27.9284	27.2548	27.1217		14	14	14	35	35	35	70.264	0	134.54	2372600000	32	Q9DC50	Q9DC50	Peroxisomal carnitine O-octanoyltransferase	Crot
26.2117	NaN	26.0135	NaN	26.8955	26.6246	25.9519	26.3862		8	8	8	18.3	18.3	18.3	58.278	0	40.043	1173800000	16	Q9DC61;A2AIW9	Q9DC61;A2AIW9	Mitochondrial-processing peptidase subunit alpha	Pmpca
NaN	NaN	NaN	NaN	25.8383	25.5414	NaN	25.5015		2	2	2	22.1	22.1	22.1	16.284	0	47.735	430080000	4	Q9DCC8	Q9DCC8	Mitochondrial import receptor subunit TOM20 homolog	Tomm20
26.4664	NaN	NaN	NaN	26.1838	25.673	26.1084	26.813		6	6	6	18.2	18.2	18.2	53.247	0	17.003	845210000	10	Q9DCD0	Q9DCD0	6-phosphogluconate dehydrogenase, decarboxylating	Pgd
25.639	25.9339	26.5687	26.4209	26.3542	26.9789	26.3938	26.155		10	10	10	48.8	48.8	48.8	37.984	0	114.73	1378200000	16	Q9DCH4	Q9DCH4	Eukaryotic translation initiation factor 3 subunit F	Eif3f
27.3339	27.8335	27.0903	27.33	26.9404	27.1108	26.8013	26.7915		7	7	7	48.8	48.8	48.8	19.992	0	21.345	1917600000	10	Q9DCJ5	Q9DCJ5	NADH dehydrogenase [ubiquinone] 1 alpha subcomplex subunit 8	Ndufa8
26.2464	NaN	25.8348	25.2166	27.4244	26.7275	26.2434	28.0101		16	16	16	43.1	43.1	43.1	47.006	0	70.687	1517200000	27	Q9DCL9;D3Z6P1;D6RCU8	Q9DCL9	Multifunctional protein ADE2;Phosphoribosylaminoimidazole-succinocarboxamide synthase;Phosphoribosylaminoimidazole carboxylase	Paics
30.1455	29.5719	29.9618	29.0506	29.6363	28.747	28.523	29.1234		18	18	18	80.6	80.6	80.6	31.549	0	229.88	10336000000	64	Q9DCN2-2;Q9DCN2;F2Z456	Q9DCN2-2;Q9DCN2;F2Z456	NADH-cytochrome b5 reductase 3;NADH-cytochrome b5 reductase 3 membrane-bound form;NADH-cytochrome b5 reductase 3 soluble form;NADH-cytochrome b5 reductase	Cyb5r3
24.4433	NaN	NaN	NaN	NaN	25.4928	25.841	24.557		3	3	3	21.2	21.2	21.2	21.732	0	8.1863	476490000	9	Q9DCR2;A0A286YD58;A0A286YDU3	Q9DCR2	AP-3 complex subunit sigma-1	Ap3s1
27.3519	27.0634	26.6133	26.8457	27.715	27.2085	26.1244	26.3935		8	8	8	57.4	57.4	57.4	21.024	0	37.575	1742200000	17	Q9DCS9;D3YUK4	Q9DCS9;D3YUK4	NADH dehydrogenase [ubiquinone] 1 beta subcomplex subunit 10	Ndufb10
25.3077	NaN	NaN	NaN	25.441	25.2328	NaN	25.0255		4	4	4	15.6	15.6	15.6	30.149	0	19.179	389340000	6	Q9DCT2	Q9DCT2	NADH dehydrogenase [ubiquinone] iron-sulfur protein 3, mitochondrial	Ndufs3
29.5089	27.3424	27.9979	28.2705	29.1921	28.7859	28.5353	29.002		20	20	20	69.4	69.4	69.4	27.623	0	133.06	6537100000	57	Q9DCW4;A0A0U1RNP5;A0A0N4SVE0;A0A0U1RNR3;A0A0N4SWE9;A0A0U1RQB4;A0A0U1RNK9	Q9DCW4;A0A0U1RNP5;A0A0N4SVE0;A0A0U1RNR3;A0A0N4SWE9	Electron transfer flavoprotein subunit beta	Etfb
30.1935	29.3697	29.3154	29.8696	30.3986	29.7253	28.7242	29.3652		13	13	13	82.6	82.6	82.6	18.749	0	172.44	12277000000	56	Q9DCX2;B1ASE2	Q9DCX2;B1ASE2	ATP synthase subunit d, mitochondrial	Atp5h
NaN	24.8561	NaN	NaN	25.0032	NaN	25.1176	25.8225		4	3	3	22.8	17.3	17.3	22.77	0	9.1289	358120000	8	Q9DD03;D3YUS4	Q9DD03;D3YUS4	Ras-related protein Rab-13	Rab13
26.0367	NaN	26.2076	NaN	26.5238	27.0261	26.9074	25.8735		14	14	14	16.9	16.9	16.9	132.39	0	39.493	1420100000	19	Q9EPE9;A0A571BD32	Q9EPE9	Manganese-transporting ATPase 13A1	Atp13a1
25.9253	26.5973	27.3554	26.8961	26.0445	27.5308	27.673	26.6907		14	14	14	20.1	20.1	20.1	122.66	0	67.359	2028600000	25	Q9EPU0-2;Q9EPU0	Q9EPU0-2;Q9EPU0	Regulator of nonsense transcripts 1	Upf1
26.7226	25.1085	NaN	27.2636	26.6151	26.9813	26.0249	26.5504		10	10	10	28.6	28.6	28.6	57.915	0	28.792	1554600000	16	Q9EQ20;A0A1Y7VJ32	Q9EQ20	Methylmalonate-semialdehyde dehydrogenase [acylating], mitochondrial	Aldh6a1
26.0043	24.705	24.8883	NaN	28.9197	28.9638	27.0043	25.5406		21	21	21	26.8	26.8	26.8	106.6	0	121.09	3262500000	38	Q9EQH2;A0A1Y7VMT6;A0A1Y7VNY4	Q9EQH2	Endoplasmic reticulum aminopeptidase 1	Erap1
27.5514	26.2545	25.9494	26.7878	28.6868	28.8978	28.7384	28.164		27	27	27	39.3	39.3	39.3	91.712	0	233.9	4632900000	52	Q9EQH3	Q9EQH3	Vacuolar protein sorting-associated protein 35	Vps35
27.3064	26.7078	26.6962	27.6643	26.8009	27.4652	27.1175	27.5113		17	16	13	41	39	34.9	61.48	0	70.325	2309400000	32	Q9EQP2	Q9EQP2	EH domain-containing protein 4	Ehd4
28.359	26.0064	28.4012	27.1613	28.2277	29.115	28.941	28.9537		15	15	15	47.4	47.4	47.4	31.195	0	323.31	5933400000	48	Q9ER00	Q9ER00	Syntaxin-12	Stx12
NaN	NaN	NaN	NaN	25.0772	25.2193	25.0427	NaN		4	4	4	14.6	14.6	14.6	37.817	0	8.3012	333500000	3	Q9ER41;F6ZDX6;F6VK94;D6REF0	Q9ER41	Torsin-1B	Tor1b
29.1897	28.8021	29.5129	30.4275	28.7129	28.6844	28.9804	29.8161		27	27	27	40.8	40.8	40.8	84.059	0	89.896	8825300000	77	Q9ERG0;Q9ERG0-2;A0A2R8VI67;B2BBR6;A0A5F8MPJ5;Q4U4S6	Q9ERG0;Q9ERG0-2	LIM domain and actin-binding protein 1	Lima1
26.796	NaN	26.6315	27.2742	27.0665	26.3179	26.8919	27.0128		7	7	7	31.7	31.7	31.7	25.017	0	16.961	1503900000	13	Q9ERI2;Q99P58	Q9ERI2	Ras-related protein Rab-27A	Rab27a
25.6119	NaN	NaN	NaN	26.4313	25.3312	NaN	24.9931		4	4	4	34.7	34.7	34.7	16.859	0	11.315	457350000	6	Q9ERS2	Q9ERS2	NADH dehydrogenase [ubiquinone] 1 alpha subcomplex subunit 13	Ndufa13
27.0663	28.4083	27.1648	27.7115	26.7684	27.3165	27.8353	26.9525		3	3	3	21.5	21.5	21.5	25.428	0	28.628	2632400000	10	Q9ES97-3;Q9ES97-4;Q9ES97-5;Q9ES97-2;Q9ES97	Q9ES97-3;Q9ES97-4;Q9ES97-5;Q9ES97-2;Q9ES97	Reticulon-3	Rtn3
28.1167	27.9653	28.472	28.3757	28.5204	28.6762	28.5264	28.3775		10	10	10	73.3	73.3	73.3	23.648	0	242.86	5696400000	29	Q9ESP1	Q9ESP1	Stromal cell-derived factor 2-like protein 1	Sdf2l1
26.5091	25.9884	26.4219	26.1293	26.7954	27.3966	26.3788	27.1152		9	9	9	30.6	30.6	30.6	56.253	0	51.144	1628300000	16	Q9ET22	Q9ET22	Dipeptidyl peptidase 2	Dpp7
NaN	NaN	NaN	NaN	24.0813	24.8319	24.4753	NaN		5	5	5	10.9	10.9	10.9	72.367	0	10.703	229670000	5	Q9ET54-3;Q9ET54-5;Q9ET54-4;Q9ET54-2;Q9ET54-6;Q9ET54;D3Z1J5;A0A1W2P7G1;Q5DTJ9	Q9ET54-3;Q9ET54-5;Q9ET54-4;Q9ET54-2;Q9ET54-6;Q9ET54;D3Z1J5	Palladin	Palld
26.9239	NaN	NaN	NaN	28.0153	28.1297	28.0171	27.6454		11	11	11	27.2	27.2	27.2	93.459	0	37.658	2618400000	23	Q9JHF5;F6XRE6;A0A494B9E3	Q9JHF5	V-type proton ATPase subunit a	Tcirg1
26.5648	NaN	26.0628	26.6273	25.5937	25.9834	24.941	26.3228		7	7	7	20.3	20.3	20.3	46.325	0	13.108	917410000	10	Q9JHI5	Q9JHI5	Isovaleryl-CoA dehydrogenase, mitochondrial	Ivd
24.5263	NaN	24.9127	24.6323	24.3901	23.9756	24.374	NaN		4	4	4	17.4	17.4	17.4	32.135	0	8.1825	252310000	4	Q9JHP7-3;Q9JHP7-2;Q9JHP7;D6RE32	Q9JHP7-3;Q9JHP7-2;Q9JHP7;D6RE32	KDEL motif-containing protein 1	Kdelc1
30.562	29.2809	30.1128	30.6664	31.5783	30.3476	30.9151	31.3485		125	125	115	34.1	34.1	31.2	532.04	0	323.31	24728000000	271	Q9JHU4	Q9JHU4	Cytoplasmic dynein 1 heavy chain 1	Dync1h1
NaN	NaN	24.9636	NaN	25.5608	26.7239	25.9908	25.4741		11	11	11	24.4	24.4	24.4	70.843	0	60.759	812900000	12	Q9JIG7	Q9JIG7	Coiled-coil domain-containing protein 22	Ccdc22
NaN	26.1711	26.7854	27.1085	26.5156	25.7154	26.4077	26.5701		8	8	8	32.3	32.3	32.3	36.586	0	19.145	1235200000	25	Q9JII6;B1AXW3	Q9JII6;B1AXW3	Alcohol dehydrogenase [NADP(+)]	Akr1a1
28.2775	27.7772	27.3107	28.9457	27.7528	27.4795	26.9334	27.9362		10	10	10	65	65	65	23.349	0	175.5	3279100000	19	Q9JIW9;P63321;A0A1Y7VL93;F6QC68	Q9JIW9;P63321	Ras-related protein Ral-B;Ras-related protein Ral-A	Ralb;Rala
25.1777	27.4515	28.3042	NaN	27.1246	29.1224	29.076	27.6867		10	10	10	61.4	61.4	61.4	8.2038	0	22.472	4973900000	41	Q9JJI8	Q9JJI8	60S ribosomal protein L38	Rpl38
NaN	23.0769	NaN	NaN	21.5234	24.9595	25.6113	NaN		5	2	2	25.3	11.6	11.6	30.764	0	5.8609	274900000	6	Q9JKB3-2;Q9JKB3	Q9JKB3-2;Q9JKB3	Y-box-binding protein 3	Ybx3
32.1596	30.2865	31.6828	32.1291	32.3102	30.9435	31.8181	32.214		86	86	86	70.7	70.7	70.7	188.74	0	323.31	49475000000	300	Q9JKF1;A0A0U1RNG5;A0A0U1RPU3;Q3UQP1;F8VQ29;Q3UQ44;A0A0U1RPI2	Q9JKF1	Ras GTPase-activating-like protein IQGAP1	Iqgap1
31.3557	31.2038	31.5209	30.7244	31.5975	31.4106	31.214	30.4448		48	48	48	50.3	50.3	50.3	111.18	0	323.31	38698000000	187	Q9JKR6;F6TRP3;A0A1L1SQ34;E0CYZ2	Q9JKR6	Hypoxia up-regulated protein 1	Hyou1
NaN	NaN	NaN	26.1277	25.1185	25.427	25.7246	26.3906		6	6	6	16.5	16.5	16.5	61.859	0	13.675	795070000	9	Q9JLV1	Q9JLV1	BAG family molecular chaperone regulator 3	Bag3
26.9327	26.558	27.5336	27.307	27.0262	27.1201	26.9259	27.7353		10	10	10	55.6	55.6	55.6	20.524	0	47.225	2141300000	28	Q9JM76;H7BWZ3;A0A0G2JFK7;D3Z2F7;D3Z2F8	Q9JM76;H7BWZ3;A0A0G2JFK7;D3Z2F7;D3Z2F8	Actin-related protein 2/3 complex subunit 3	Arpc3
NaN	26.7138	26.5558	NaN	24.9347	26.4907	26.6216	25.6097		5	5	5	34.5	34.5	34.5	16.369	0	10.945	1042200000	11	Q9JMG1	Q9JMG1	Endothelial differentiation-related factor 1	Edf1
25.1331	NaN	NaN	NaN	24.6939	23.5893	24.7519	24.5541		3	3	3	8	8	8	54.544	0	5.2539	236290000	5	Q9JMH6-2;Q9JMH6;Q9D8I4;A0A0U1RPS1;A0A1W2P6U1;A0A0U1RPC6;A0A0M3HEP9;D3Z0K8;J3QMN4;A0A0U1RPV8;A0A0U1RQA4;J3QMQ8;A0A0M3HEQ0;Q9JLT4-3;Q9JLT4-2;Q9JLT4-4;Q9JLT4	Q9JMH6-2;Q9JMH6	Thioredoxin reductase 1, cytoplasmic	Txnrd1
29.6735	28.5157	29.7838	29.8424	28.714	27.8648	28.4132	28.869		11	11	4	65.3	65.3	25.9	21.782	0	52.552	6651400000	45	Q9QUI0;A0A0A6YXF6;A0A0A6YWJ1;Q9CR99	Q9QUI0;A0A0A6YXF6	Transforming protein RhoA	Rhoa
NaN	NaN	NaN	NaN	NaN	24.3257	23.7854	23.5317		3	2	2	7.8	5.2	5.2	74.338	0	10.686	233380000	3	Q9QUJ7-2;Q9QUJ7	Q9QUJ7-2;Q9QUJ7	Long-chain-fatty-acid--CoA ligase 4	Acsl4
NaN	NaN	NaN	NaN	24.8029	23.3991	23.7832	NaN		3	3	3	5.4	5.4	5.4	80.751	0	4.011	109380000	5	Q9QUR6	Q9QUR6	Prolyl endopeptidase	Prep
26.8942	27.1519	27.2743	26.799	27.2067	27.3437	26.765	27.6053		13	13	6	31.3	31.3	12.5	47.234	0	68.263	2486400000	29	Q9QWR8;Q3UZX5;A0A2R8VHH9;A0A2R8W742	Q9QWR8;Q3UZX5	Alpha-N-acetylgalactosaminidase	Naga
NaN	NaN	NaN	NaN	NaN	23.7225	24.6475	24.1126		7	4	4	12.5	8.3	8.3	97.55	0	18.846	183460000	4	Q9QXK3-4;Q9QXK3;Q9QXK3-3;Q9QXK3-2	Q9QXK3-4;Q9QXK3;Q9QXK3-3	Coatomer subunit gamma-2	Copg2
28.8656	28.4364	28.6119	29.7766	29.6829	29.7287	29.9765	30.1187		85	85	85	27.9	27.9	27.9	517.28	0	323.31	11456000000	150	Q9QXS1-3;E9Q3W4;Q9QXS1-15;Q9QXS1-10;Q9QXS1-9;Q9QXS1-12;Q9QXS1-11;Q9QXS1-13;Q9QXS1-5;Q9QXS1-16;Q9QXS1-4;Q9QXS1-14;Q9QXS1-6;Q9QXS1-7;Q9QXS1-8;Q9QXS1-2;Q9QXS1;A0A3B2W7J8;A0A0R4J218;E9PW24;A0A0R4J223;E9Q9J6;A0A0R4J221;A0A7N9VRC4;Q8R0W0	Q9QXS1-3;E9Q3W4;Q9QXS1-15;Q9QXS1-10;Q9QXS1-9;Q9QXS1-12;Q9QXS1-11;Q9QXS1-13;Q9QXS1-5;Q9QXS1-16;Q9QXS1-4;Q9QXS1-14;Q9QXS1-6;Q9QXS1-7;Q9QXS1-8;Q9QXS1-2;Q9QXS1	Plectin	Plec
29.4759	30.3228	29.7847	29.3221	28.5245	29.2241	29.1048	28.4492		17	17	17	75.3	75.3	75.3	20.767	0	295.74	10239000000	60	Q9QXT0;A0A1W2P729	Q9QXT0;A0A1W2P729	Protein canopy homolog 2	Cnpy2
29.1016	28.5187	29.5011	29.9464	29.4257	28.8138	29.1875	29.5746		17	17	17	79.4	79.4	79.4	28.729	0	189.27	9337600000	57	Q9QYB1;E0CY42;A0A668KLB7;Q8BXK9;Q8BHB9	Q9QYB1	Chloride intracellular channel protein 4	Clic4
NaN	NaN	27.7165	NaN	26.7839	27.058	27.4782	27.2107		8	8	8	30	30	30	33.24	0	30.025	1824500000	16	Q9R1R8;Q9QYF1	Q9R1R8;Q9QYF1	Retinol dehydrogenase 11	Rdh11
26.9379	26.379	NaN	NaN	26.6414	25.503	NaN	25.391		6	6	6	20.1	20.1	20.1	49.656	0	46.861	882260000	10	Q9QYR9;O55137;Q32Q92-2;Q32Q92;Q8BWN8;A0A1Y7VMZ4;Q91YQ6;Q9QYR7-2;Q6Q2Z6;Q9QYR7	Q9QYR9;O55137	Acyl-coenzyme A thioesterase 2, mitochondrial;Acyl-coenzyme A thioesterase 1	Acot2;Acot1
26.5096	NaN	25.4547	NaN	26.7085	27.2222	25.8377	27.1157		7	7	7	32.8	32.8	32.8	31.715	0	174.55	1337900000	16	Q9QZD8	Q9QZD8	Mitochondrial dicarboxylate carrier	Slc25a10
25.5211	NaN	26.197	NaN	25.6364	26.8464	26.9263	26.2685		8	8	8	36	36	36	36.46	0	16.959	1147500000	15	Q9QZD9;A2AE03	Q9QZD9	Eukaryotic translation initiation factor 3 subunit I	Eif3i
26.0884	NaN	NaN	27.921	26.5537	25.372	26.0341	28.0165		11	11	11	23.2	23.2	23.2	61.359	0	30.921	1263800000	17	Q9QZF2	Q9QZF2	Glypican-1;Secreted glypican-1	Gpc1
NaN	NaN	25.755	NaN	26.7603	25.735	26.6375	27.1721		9	9	9	34.2	34.2	34.2	37.402	0	23.875	994680000	18	Q9R062;V9GX26;K3W4S6	Q9R062;V9GX26;K3W4S6	Glycogenin-1	Gyg1;Gyg
28.4536	26.5986	27.0873	NaN	28.7812	28.2431	27.2954	26.2795		21	19	19	32	30.6	30.6	84.921	0	157.54	3164500000	40	Q9R0E1;F6W3Q8	Q9R0E1	Procollagen-lysine,2-oxoglutarate 5-dioxygenase 3	Plod3
28.8067	28.5695	27.8135	26.9902	28.8388	28.0316	27.2319	26.6879		23	23	21	34.2	34.2	32.8	83.594	0	118.66	3906800000	46	Q9R0E2;A8Y5E6;F6WNR1	Q9R0E2	Procollagen-lysine,2-oxoglutarate 5-dioxygenase 1	Plod1
28.3953	25.3564	28.4933	28.7092	30.4102	30.617	30.6005	29.7632		46	46	46	84.4	84.4	84.4	74.717	0	323.31	15030000000	114	Q9R0H0-2;Q9R0H0;A2A848	Q9R0H0-2;Q9R0H0;A2A848	Peroxisomal acyl-coenzyme A oxidase 1	Acox1
28.535	27.4261	27.7595	27.8061	29.8647	28.9578	29.5881	29.9345		19	15	15	81.8	73.3	73.3	18.521	0	269.55	7899800000	51	Q9R0P5	Q9R0P5	Destrin	Dstn
26.5	26.6851	26.9062	26.4346	27.7027	27.9199	26.4299	26.2504		12	12	12	28.9	28.9	28.9	50.56	0	57.536	2501100000	26	Q9R0X4;Q32MW3	Q9R0X4;Q32MW3	Acyl-coenzyme A thioesterase 9, mitochondrial;Acyl-coenzyme A thioesterase 10, mitochondrial	Acot9;Acot10
NaN	NaN	NaN	NaN	NaN	24.9428	25.3417	25.9534		3	3	3	19.5	19.5	19.5	29.47	0	4.4013	480480000	7	Q9R1P0;E9Q0X0;E9PW69	Q9R1P0;E9Q0X0;E9PW69	Proteasome subunit alpha type-4;Proteasome subunit alpha type	Psma4
NaN	NaN	NaN	26.5737	25.9565	24.9276	25.6846	26.0331		5	5	5	21.7	21.7	21.7	29.546	0	6.6192	785300000	10	Q9R1P4;A0A1B0GS70	Q9R1P4;A0A1B0GS70	Proteasome subunit alpha type-1	Psma1
NaN	NaN	NaN	26.4621	25.9044	24.8892	NaN	26.4975		5	5	5	8.6	8.6	8.6	77.057	0	11.252	505250000	8	Q9R1V7-4;Q9R1V7-3;Q9R1V7-2;Q9R1V7	Q9R1V7-4;Q9R1V7-3;Q9R1V7-2;Q9R1V7	Disintegrin and metalloproteinase domain-containing protein 23	Adam23
30.8722	30.0619	30.556	30.7236	30.7679	30.001	30.3518	30.7234		63	63	63	61.4	61.4	61.4	118.15	0	323.31	19766000000	163	Q9WTI7-2;Q9WTI7-3;Q9WTI7;Q9WTI7-4;Q5ND45	Q9WTI7-2;Q9WTI7-3;Q9WTI7;Q9WTI7-4	Unconventional myosin-Ic	Myo1c
29.085	28.1453	25.8409	27.4026	28.5028	29.0525	27.0727	27.5619		17	17	17	72.4	72.4	72.4	25.605	0	145.72	4582700000	29	Q9WTP6-2;Q9WTP6;F7BP55	Q9WTP6-2;Q9WTP6	Adenylate kinase 2, mitochondrial;Adenylate kinase 2, mitochondrial, N-terminally processed	Ak2
28.2284	27.5617	27.6699	27.8625	29.0384	28.8194	27.6943	28.2908		13	13	13	61.2	61.2	61.2	25.426	0	155.73	4842900000	46	Q9WTP7;F6RP11	Q9WTP7	GTP:AMP phosphotransferase AK3, mitochondrial	Ak3
NaN	NaN	NaN	NaN	NaN	23.6398	23.9842	23.8809		2	2	2	19	19	19	18.672	0	38.225	175620000	6	Q9WTX5	Q9WTX5	S-phase kinase-associated protein 1	Skp1
26.2648	25.9553	26.7967	26.8509	27.5177	27.2099	26.7946	26.9959		15	15	15	23.5	23.5	23.5	96.023	0	140.5	1782700000	21	Q9WU78;Q9WU78-3;Q9WU78-2	Q9WU78;Q9WU78-3	Programmed cell death 6-interacting protein	Pdcd6ip
NaN	25.63	NaN	NaN	25.3482	25.6079	NaN	25.5038		6	6	6	17.9	17.9	17.9	68.035	0	35.354	540120000	12	Q9WU79;A0A0R4J1T9;A0A338P738;F6YFQ5;E9PUR5;F6XMC0;F6PYI8	Q9WU79;A0A0R4J1T9	Proline dehydrogenase 1, mitochondrial	Prodh
25.9877	25.6807	26.0357	26.1769	25.6042	26.2836	26.3253	25.8796		8	8	8	15.8	15.8	15.8	65.696	0	20.235	1065900000	15	Q9WUA2;A0A087WPV4;A0A087WS80	Q9WUA2;A0A087WPV4	Phenylalanine--tRNA ligase beta subunit	Farsb
26.835	27.167	28.6809	28.4342	26.7116	28.0578	28.4328	28.2122		10	10	10	50	50	50	25.186	0	111.38	4042900000	26	Q9WUK2-2;Q9WUK2	Q9WUK2-2;Q9WUK2	Eukaryotic translation initiation factor 4H	Eif4h
28.0993	27.8024	27.2066	26.6273	28.2785	27.5491	27.9126	29.2556		15	15	15	39.3	39.3	39.3	53.912	0	80.129	3809600000	37	Q9WUM3;A0A494B9Y4;D3YUG6;A0A494BAI1	Q9WUM3;A0A494B9Y4	Coronin-1B	Coro1b
30.0297	27.2361	29.3554	30.5092	30.6537	29.9153	30.3377	31.1027		24	24	24	53.4	53.4	53.4	53.12	0	317.13	16279000000	79	Q9WUM4;E9PX03;E9PZJ0;E9PVJ1;B9EIZ7;Q920M5-3;Q920M5-2;Q920M5;Q920M5-4	Q9WUM4	Coronin-1C	Coro1c
29.2722	29.1208	28.1675	28.8192	28.2755	27.6541	27.1304	27.8245		13	13	13	43.1	43.1	43.1	36.154	0	113.46	4641000000	37	Q9WUM5;A0A0N4SVU4	Q9WUM5	Succinyl-CoA ligase [ADP/GDP-forming] subunit alpha, mitochondrial	Suclg1
25.549	NaN	NaN	26.7567	27.1502	27.5808	26.2588	27.0536		12	12	12	42.2	42.2	42.2	39.503	0	66.983	1602500000	20	Q9WUR2-2;Q3TCD4;Q9WUR2;E9PYC6;E9Q858;E9PUY9;E9PYA9;E9PVM6;E9Q7A8;E9PY42;Q78JN3	Q9WUR2-2;Q3TCD4;Q9WUR2;E9PYC6;E9Q858;E9PUY9;E9PYA9;E9PVM6;E9Q7A8	Enoyl-CoA delta isomerase 2, mitochondrial	Eci2
29.5356	28.2871	27.927	28.4885	30.3428	30.7728	30.5632	30.073		16	16	16	56.5	56.5	56.5	33.996	0	323.31	16044000000	41	Q9WUU7	Q9WUU7	Cathepsin Z	Ctsz
28.6824	27.6237	27.6072	27.9114	29.6855	29.0543	28.6754	28.4673		18	18	18	41.4	41.4	41.4	44.669	0	154.97	6848600000	62	Q9WV54;D3Z505	Q9WV54	Acid ceramidase;Acid ceramidase subunit alpha;Acid ceramidase subunit beta	Asah1
28.6659	28.8731	27.6485	28.6288	28.1117	28.8601	28.5742	27.6063		11	11	11	49.4	49.4	49.4	27.855	0	159.94	6106200000	37	Q9WV55;A0A3B2W837	Q9WV55	Vesicle-associated membrane protein-associated protein A	Vapa
30.032	28.541	29.5794	29.9418	29.3548	28.6987	29.5497	30.1493		34	27	1	44.4	38.5	1.9	100.73	0	78.342	9449800000	83	Q9WV92-5;Q9WV92-2;A7YY80;A0A5F8MPR1;Q9WV92-6;Q9WV92-4;Q9WV92-3;Q9WV92;A0A3B2WD96;A0A5F8MPE1;A0A286YD84	Q9WV92-5;Q9WV92-2;A7YY80;A0A5F8MPR1;Q9WV92-6;Q9WV92-4;Q9WV92-3;Q9WV92;A0A3B2WD96;A0A5F8MPE1;A0A286YD84	Band 4.1-like protein 3;Band 4.1-like protein 3, N-terminally processed	Epb41l3;Epb4.1l3
29.482	27.4024	29.182	28.7518	29.8255	29.1173	29.3745	29.2476		16	16	16	82.4	82.4	82.4	22.395	0	270.44	8355900000	55	Q9WVA4;A0A0A6YXG6;Q9R1Q8	Q9WVA4	Transgelin-2	Tagln2
28.7037	28.4791	28.919	29.3206	28.5647	28.3252	28.5385	29.2451		20	20	20	43.8	43.8	43.8	55.832	0	60.14	6170800000	53	Q9WVE8;Q3UP40;A0A2R8W750;A0A2R8W6S4;A0A338P6P7	Q9WVE8;Q3UP40;A0A2R8W750;A0A2R8W6S4	Protein kinase C and casein kinase substrate in neurons protein 2	Pacsin2
29.4232	29.6009	29.3674	29.8174	28.7382	28.6949	28.805	28.9783		25	25	17	63.9	63.9	40.4	60.602	0	234.8	9160500000	85	Q9WVK4	Q9WVK4	EH domain-containing protein 1	Ehd1
26.7226	NaN	26.6331	NaN	27.111	27.0336	26.9041	27.7966		9	9	9	13.3	13.3	13.3	119.48	0	96.803	1908300000	19	Q9WVL3;Q9WVL3-2;A0A1Y7VMP9	Q9WVL3;Q9WVL3-2	Solute carrier family 12 member 7	Slc12a7
30.1966	30.9833	30.4567	29.7925	28.8223	29.443	29.2029	28.7435		11	11	11	59.1	59.1	59.1	16.442	0	41.794	12600000000	29	Q9Z0J0	Q9Z0J0	Epididymal secretory protein E1	Npc2
27.8188	27.7064	28.8234	28.1815	27.3443	27.9364	28.192	27.1126		16	16	16	42.6	42.6	42.6	51.065	0	99.251	3585200000	32	Q9Z0N1;A2AAW9;Q9Z0N2	Q9Z0N1;A2AAW9;Q9Z0N2	Eukaryotic translation initiation factor 2 subunit 3, X-linked;Eukaryotic translation initiation factor 2 subunit 3, Y-linked	Eif2s3x;Eif2s3y
NaN	NaN	NaN	NaN	23.6256	24.148	23.6748	NaN		2	2	2	5.2	5.2	5.2	52.387	0	3.2168	143030000	3	Q9Z0R9	Q9Z0R9	Fatty acid desaturase 2	Fads2
NaN	NaN	25.5093	NaN	25.297	NaN	25.2976	25.3473		3	3	3	13.4	13.4	13.4	20.978	0	4.5456	322470000	7	Q9Z0Y1;E9Q919	Q9Z0Y1;E9Q919	Dynactin subunit 3	Dctn3
27.7415	25.6717	25.974	25.9204	26.8919	26.5469	24.848	25.0513		12	12	12	17.5	17.5	17.5	87.052	0	36.25	1281500000	21	Q9Z110-2;Q9Z110;H3BKJ8;H3BLE8;D3Z0B4	Q9Z110-2;Q9Z110	Delta-1-pyrroline-5-carboxylate synthase;Glutamate 5-kinase;Gamma-glutamyl phosphate reductase	Aldh18a1
28.0328	27.7676	28.4105	28.8448	28.1637	28.1848	27.9074	28.646		18	18	18	53.9	53.9	53.9	43.887	0	163.25	4227000000	40	Q9Z1G3;A0A2I3BPD0;D3Z5W3;Q99L60-3;Q99L60;Q99L60-2;A0A2I3BQD9	Q9Z1G3	V-type proton ATPase subunit C 1	Atp6v1c1
NaN	NaN	24.3294	NaN	24.3695	24.9947	23.6988	NaN		5	5	5	13.8	13.8	13.8	49.035	0	32.118	249010000	5	Q9Z1N5;Q8VDW0;G3UXI6;Q8VDW0-2;D6RHT5	Q9Z1N5;Q8VDW0	Spliceosome RNA helicase Ddx39b;ATP-dependent RNA helicase DDX39A	Ddx39b;Ddx39a
24.6426	25.0079	24.3958	24.7176	23.6244	24.4908	23.907	24.0603		4	4	4	33.6	33.6	33.6	12.575	0	7.6482	321400000	4	Q9Z1P6	Q9Z1P6	NADH dehydrogenase [ubiquinone] 1 alpha subcomplex subunit 7	Ndufa7
29.4478	30.0293	29.6103	29.7077	29.4603	29.0442	30.0596	30.0458		16	16	16	67.6	67.6	67.6	27.013	0	168.06	10237000000	48	Q9Z1Q5	Q9Z1Q5	Chloride intracellular channel protein 1	Clic1
25.2215	26.6223	27.0459	NaN	26.4202	27.6046	27.2755	26.5471		14	14	14	16.4	16.4	16.4	122.74	0	28.366	1831800000	18	Q9Z1T1;A0A338P6V5	Q9Z1T1	AP-3 complex subunit beta-1	Ap3b1
NaN	24.8612	NaN	NaN	25.3271	26.5614	25.7327	25.4411		6	6	6	27.4	27.4	27.4	38.442	0	21.773	798450000	8	Q9Z1Z2	Q9Z1Z2	Serine-threonine kinase receptor-associated protein	Strap
28.8809	29.4835	27.9853	27.9348	27.0115	28.2221	27.6024	27.1624		11	11	11	20.5	20.5	20.5	62.995	0	101.57	4902900000	36	Q9Z247	Q9Z247	Peptidyl-prolyl cis-trans isomerase FKBP9	Fkbp9
NaN	NaN	NaN	NaN	22.6591	23.2352	23.4124	NaN		2	2	2	23.5	23.5	23.5	14.904	0	61.646	108310000	2	Q9Z266;V9GXI0;V9GXT7;Q9Z266-2	Q9Z266;V9GXI0;V9GXT7;Q9Z266-2	SNARE-associated protein Snapin	Snapin
NaN	25.357	NaN	NaN	25.9412	25.9859	25.036	25.3633		7	7	7	15.3	15.3	15.3	82.988	0	24	613490000	6	Q9Z2I0	Q9Z2I0	LETM1 and EF-hand domain-containing protein 1, mitochondrial	Letm1
27.3161	27.5113	26.4474	26.9474	26.7533	26.3365	25.9771	26.0135		10	10	10	29.2	29.2	29.2	41.349	0	67.503	1640200000	25	Q9Z2I8-2;Q9Z2I8;A0A0N4SWD1	Q9Z2I8-2;Q9Z2I8	Succinyl-CoA ligase [GDP-forming] subunit beta, mitochondrial	Suclg2
27.7866	26.568	26.3278	27.0801	27.1635	26.9719	26.4819	26.5839		13	13	13	29.6	29.6	29.6	50.113	0	84.992	1918000000	15	Q9Z2I9	Q9Z2I9	Succinyl-CoA ligase [ADP-forming] subunit beta, mitochondrial	Sucla2
NaN	NaN	NaN	NaN	NaN	25.5397	25.9759	26.4605		3	3	3	19.1	19.1	19.1	26.411	0	22.376	608510000	4	Q9Z2U1	Q9Z2U1	Proteasome subunit alpha type-5	Psma5

## Sheet: Analysis melan-c2
Digested_01	Digested_02	Digested_03	Digested_04	Total_01	Total_02	Total_03	Total_04	Seletion	Peptides	Razor + unique peptides	Unique peptides	Sequence coverage [%]	Unique + razor sequence coverage [%]	Unique sequence coverage [%]	Mol. weight [kDa]	Q-value	Score	Intensity	MS/MS count	Protein IDs	Majority protein IDs	Protein names	Gene names
NaN	NaN	NaN	NaN	28.1457	28.2803	28.2	28.5333	+	4	4	4	70.3	70.3	70.3	9.6418	0	323.31	3645600000	14	Q9D1L9;G3UW70	Q9D1L9;G3UW70	Ragulator complex protein LAMTOR5	Lamtor5
NaN	NaN	NaN	NaN	28.6657	27.3179	28.4836	28.4226	+	3	3	3	35.3	35.3	35.3	15.265	0	323.31	3557500000	12	E9Q9C5;P63082	E9Q9C5;P63082	V-type proton ATPase 16 kDa proteolipid subunit	Atp6v0c
NaN	NaN	NaN	NaN	29.2304	28.7256	28.7027	29.3815	+	18	18	18	53.5	53.5	53.5	57.477	0	245.25	5261300000	37	P80314;A0A1W2P7B7;A0A1W2P6Q3;A0A1W2P828;A0A1W2P871;A0A1W2P8B6	P80314	T-complex protein 1 subunit beta	Cct2
NaN	NaN	NaN	NaN	27.596	28.1099	28.1942	27.9969	+	24	8	8	33.7	17.4	17.4	103.93	0	234.59	2758200000	18	O35643;Q5SVG5;Q5SVG4	O35643;Q5SVG5;Q5SVG4	AP-1 complex subunit beta-1	Ap1b1
NaN	NaN	NaN	NaN	27.2482	26.7176	26.6877	26.8028	+	4	4	4	31.9	31.9	31.9	15.556	0	234.57	1233300000	12	A0A0A6YY29;Q9CXW3	A0A0A6YY29;Q9CXW3	Calcyclin-binding protein	Cacybp
NaN	NaN	NaN	NaN	28.2076	27.7611	28.0807	28.0661	+	10	10	10	39.6	39.6	39.6	47.129	0	233.45	2856200000	20	Q8R127;J3QNN5;F6S0R8	Q8R127;J3QNN5	Saccharopine dehydrogenase-like oxidoreductase	Sccpdh
NaN	NaN	NaN	NaN	30.0377	29.1409	29.1694	29.4963	+	15	15	15	47.3	47.3	47.3	42.785	0	226.12	7893700000	45	P70404	P70404	Isocitrate dehydrogenase [NAD] subunit gamma 1, mitochondrial	Idh3g
NaN	NaN	NaN	NaN	26.3631	26.4211	26.3789	25.3351	+	14	4	4	38.7	9.8	9.8	50.09	0	210.32	793220000	7	Q922F4	Q922F4	Tubulin beta-6 chain	Tubb6
NaN	NaN	NaN	NaN	27.7873	26.6732	26.6891	26.4682	+	6	6	6	47.6	47.6	47.6	11.675	0	203.93	1365200000	11	P10639	P10639	Thioredoxin	Txn
NaN	NaN	NaN	NaN	27.1013	25.9828	26.6355	26.4725	+	17	5	5	47.7	18.1	18.1	40.361	0	188.49	1020900000	13	B2RSH2;A2AE32;P20612;Q3V3I2;P50149;A2AE31;A2A610;Q8C040;Q8BHK8;F6QPU5	B2RSH2	Guanine nucleotide-binding protein G(i) subunit alpha-1	Gnai1
NaN	NaN	NaN	NaN	28.2575	28.422	29.0393	28.6644	+	5	5	5	58.4	58.4	58.4	12.746	0	170.67	4287300000	13	P48024;J3QN87;A0A1L1SSA3;J3QPZ8;Q9CXU9	P48024	Eukaryotic translation initiation factor 1	Eif1
NaN	NaN	NaN	NaN	28.2191	28.3329	28.5124	28.5793	+	6	6	6	10.6	10.6	10.6	80.597	0	161.45	3565000000	17	P46978	P46978	Dolichyl-diphosphooligosaccharide--protein glycosyltransferase subunit STT3A	Stt3a
NaN	NaN	NaN	NaN	25.3479	24.8784	26.1903	NaN		4	4	4	11.9	11.9	11.9	72.057	0	161.36	465380000	5	Q8CH72;A2AGS0;A2AGS1	Q8CH72;A2AGS0;A2AGS1	E3 ubiquitin-protein ligase TRIM32	Trim32
NaN	NaN	NaN	NaN	28.8872	28.5516	28.7905	28.4567	+	10	10	6	53.7	53.7	36.1	23.412	0	131.78	5125800000	33	P35278;Q8C266;Q9CQD1;A2A5F5;A2A5F6	P35278;Q8C266	Ras-related protein Rab-5C	Rab5c
NaN	NaN	NaN	NaN	NaN	26.421	26.838	25.9659		6	6	6	24.9	24.9	24.9	42.516	0	129.78	1084500000	13	Q99JX4;A2A702	Q99JX4	Eukaryotic translation initiation factor 3 subunit M	Eif3m
NaN	NaN	NaN	NaN	25.8999	26.2712	25.4159	26.015	+	5	5	5	17.8	17.8	17.8	47.262	0	127.32	729930000	6	Q9DBG5;A0A3B2WCW2	Q9DBG5	Perilipin-3	Plin3
NaN	NaN	NaN	NaN	26.5111	25.9735	25.4017	26.2741	+	5	5	5	28.7	28.7	28.7	26.738	0	125.22	663100000	10	Q9D8S4;A0A1L1SS58	Q9D8S4	Oligoribonuclease, mitochondrial	Rexo2
NaN	NaN	NaN	NaN	26.044	26.9442	27.597	26.5621	+	10	10	10	36.6	36.6	36.6	51.209	0	124.67	1406700000	12	A0A087WQS2;Q9CQC6;A0A087WPF9;A0A087WS48	A0A087WQS2;Q9CQC6	Basic leucine zipper and W2 domain-containing protein 1	Bzw1
NaN	NaN	NaN	NaN	28.4325	28.4501	28.7253	28.6699	+	11	11	11	42.3	42.3	42.3	40.685	0	123.65	4083500000	29	Q9R1J0	Q9R1J0	Sterol-4-alpha-carboxylate 3-dehydrogenase, decarboxylating	Nsdhl
NaN	NaN	NaN	NaN	26.1934	25.4283	26.5123	26.3055	+	4	4	4	24.5	24.5	24.5	23.478	0	122.15	717230000	7	B1AWE0;Q6PFA2;B1AWE1;B1AWD8;B1AWD9;O08585	B1AWE0;Q6PFA2;B1AWE1;B1AWD8;B1AWD9;O08585	Clathrin light chain A	Clta
NaN	NaN	NaN	NaN	28.6338	28.5662	29.0901	28.7023	+	11	11	11	61.9	61.9	61.9	24.74	0	120.22	4810100000	20	O08547;E9Q6R3;A0A0G2JF08;D6RES2	O08547;E9Q6R3	Vesicle-trafficking protein SEC22b	Sec22b
NaN	NaN	NaN	NaN	27.7733	27.4253	27.6833	27.3974	+	9	9	9	25.2	25.2	25.2	69.926	0	120.01	2249600000	16	Q04519	Q04519	Sphingomyelin phosphodiesterase	Smpd1
NaN	NaN	NaN	NaN	28.0578	26.8938	27.7253	27.3058	+	2	2	2	33.1	33.1	33.1	16.168	0	117.42	1951400000	8	Q8K5B2;D3Z6A4;D3Z1G3	Q8K5B2;D3Z6A4;D3Z1G3	Multiple coagulation factor deficiency protein 2 homolog	Mcfd2
NaN	NaN	NaN	NaN	28.9102	27.7827	27.6567	28.1329	+	6	6	6	55.8	55.8	55.8	22.417	0	116.37	2924300000	21	P85094	P85094	Isochorismatase domain-containing protein 2A, mitochondrial	Isoc2a
NaN	NaN	NaN	NaN	27.3019	27.44	26.8484	27.2961	+	7	7	7	14.6	14.6	14.6	67.589	0	115.79	1563100000	18	Q9CZW5	Q9CZW5	Mitochondrial import receptor subunit TOM70	Tomm70a
NaN	NaN	NaN	NaN	27.9917	27.8988	28.2299	27.9316	+	13	13	13	28.1	28.1	28.1	69.622	0	115.05	2987800000	25	Q9DBG7;F6VF36;A0A1L1SSI7	Q9DBG7;F6VF36	Signal recognition particle receptor subunit alpha	Srpr
NaN	NaN	NaN	NaN	27.341	26.9476	26.6893	27.0329	+	9	9	9	21.4	21.4	21.4	79.921	0	114.82	1436300000	15	Q91ZA3;H3BL62;H3BKW6;D3YWM4;D3YZC0	Q91ZA3	Propionyl-CoA carboxylase alpha chain, mitochondrial	Pcca
NaN	NaN	NaN	NaN	26.5062	26.1954	26.8254	26.2409	+	6	6	6	12.3	12.3	12.3	82.425	0	110.01	998950000	10	J3QJX3;Q9Z2G6-2;Q9Z2G6	J3QJX3;Q9Z2G6-2;Q9Z2G6	Protein sel-1 homolog 1	Sel1l
NaN	NaN	NaN	NaN	24.8497	25.8615	26.0366	25.3947	+	5	5	5	17.5	17.5	17.5	33.951	0	109.48	565550000	11	A0A3Q4EBV4;Q3TJZ6	A0A3Q4EBV4;Q3TJZ6	Protein FAM98A	Fam98a
NaN	NaN	NaN	NaN	26.4171	26.8234	27.3825	26.8726	+	4	4	4	36.9	36.9	36.9	21.85	0	103.04	1326700000	5	Q8K2Q0	Q8K2Q0	COMM domain-containing protein 9	Commd9
NaN	NaN	NaN	NaN	27.9244	27.1432	27.8141	27.2966	+	9	5	5	54	36.3	36.3	23.707	0	100.15	2166900000	17	P61021	P61021	Ras-related protein Rab-5B	Rab5b
NaN	NaN	NaN	NaN	28.7593	28.6028	28.6224	28.9768	+	6	6	6	53.2	53.2	53.2	16.761	0	96.906	4327100000	17	Q8BG13;O89086;S4R2M6	Q8BG13;O89086;S4R2M6	RNA-binding protein 3	Rbm3
NaN	NaN	NaN	NaN	NaN	24.935	25.1026	25.1575		3	3	3	5.3	5.3	5.3	96.329	0	94.552	345510000	4	Q99MR3	Q99MR3	Solute carrier family 12 member 9	Slc12a9
NaN	NaN	NaN	NaN	29.3701	28.5093	28.608	28.5612	+	11	11	11	36.4	36.4	36.4	49.857	0	91.03	4667300000	32	P70158;D3Z1B4	P70158	Acid sphingomyelinase-like phosphodiesterase 3a	Smpdl3a
NaN	NaN	NaN	NaN	26.4543	26.8625	27.0152	27.0671	+	4	4	2	48.5	48.5	16.5	11.48	0	90.642	1246100000	10	P63024	P63024	Vesicle-associated membrane protein 3	Vamp3
NaN	NaN	NaN	NaN	26.1591	25.5919	26.5323	25.4843	+	8	8	8	16.4	16.4	16.4	89.519	0	89.249	674630000	12	Q8CCJ3;Q8CCJ3-1;Q8CCJ3-2	Q8CCJ3;Q8CCJ3-1;Q8CCJ3-2	E3 UFM1-protein ligase 1	Ufl1
NaN	NaN	NaN	NaN	27.7017	27.3162	27.2175	27.2654	+	6	6	6	19.9	19.9	19.9	64.647	0	87.321	1822500000	15	Q7M6Y3-2;Q7M6Y3-3;Q7M6Y3-4;Q7M6Y3-6;Q7M6Y3-5;Q7M6Y3;A0A140LHQ8;A0A140LHG9;A0A1L1SUR7;A0A087WSI9;Q3TWS4;E9Q9A3;E9QQ05;A0A5F8MPL3;E9QLK9;Q61548-3;Q61548-2;Q61548	Q7M6Y3-2;Q7M6Y3-3;Q7M6Y3-4;Q7M6Y3-6;Q7M6Y3-5;Q7M6Y3;A0A140LHQ8	Phosphatidylinositol-binding clathrin assembly protein	Picalm
NaN	NaN	NaN	NaN	27.0012	26.5394	26.6733	26.7557	+	8	8	7	32.9	32.9	32.9	43.165	0	87.066	1143300000	16	A0A0A6YX73;Q8K1M3;P12367;A0A0A6YY28	A0A0A6YX73;Q8K1M3;P12367;A0A0A6YY28	cAMP-dependent protein kinase type II-alpha regulatory subunit	Prkar2a
NaN	NaN	NaN	NaN	29.6057	29.5507	29.8641	30.2164	+	10	10	10	78	78	78	13.724	0	86.281	9694100000	19	Q9CR51	Q9CR51	V-type proton ATPase subunit G 1	Atp6v1g1
NaN	NaN	NaN	NaN	27.4053	27.1916	27.2133	26.5304	+	10	10	10	23.3	23.3	23.3	74.717	0	86.035	1567800000	19	Q9R0H0-2;Q9R0H0;A2A848	Q9R0H0-2;Q9R0H0;A2A848	Peroxisomal acyl-coenzyme A oxidase 1	Acox1
NaN	NaN	NaN	NaN	26.6414	26.1417	26.4619	26.5769	+	6	6	6	43.6	43.6	43.6	24.54	0	85.502	959850000	12	Q8C5G6;Q9QZ06;F7AT44;A9JEI5	Q8C5G6;Q9QZ06;F7AT44	Toll-interacting protein	Tollip
NaN	NaN	NaN	NaN	27.1298	27.2588	26.9077	26.9351	+	15	9	9	24.7	19.2	19.2	74.569	0	84.353	1471800000	18	Q8BH59;V9GXX9	Q8BH59	Calcium-binding mitochondrial carrier protein Aralar1	Slc25a12
NaN	NaN	NaN	NaN	26.2031	25.9665	25.8689	26.3796	+	5	5	5	5.1	5.1	5.1	206.82	0	84.185	694780000	11	B0V2N1-6;B0V2N1-2;B0V2N1;B0V2N1-4;B0V2N1-3;A0A286YDF6;A0A286YDS2;B0V2N1-5	B0V2N1-6;B0V2N1-2;B0V2N1;B0V2N1-4;B0V2N1-3	Receptor-type tyrosine-protein phosphatase S	Ptprs
NaN	NaN	NaN	NaN	26.702	26.2895	27.0085	26.4184	+	5	5	5	13.6	13.6	13.6	69.274	0	83.445	1097100000	13	F7A1B4;Q3UAM9;Q63961;F7BZW0	F7A1B4;Q3UAM9;Q63961	Endoglin	Eng
NaN	NaN	NaN	NaN	26.0957	26.6994	26.7307	26.1751	+	4	4	4	44.2	44.2	44.2	19.571	0	82.197	1044600000	10	A2A9I0;O35166	A2A9I0;O35166	Golgi SNAP receptor complex member 2	Gosr2
NaN	NaN	NaN	NaN	NaN	25.3297	25.6108	25.6952		4	4	4	5.2	5.2	5.2	121.15	0	82.082	428640000	6	Z4YJT3;Q6ZQ58	Z4YJT3;Q6ZQ58	La-related protein 1	Larp1
NaN	NaN	NaN	NaN	27.1921	26.8854	27.1878	26.9052	+	8	8	8	16.9	16.9	16.9	94.825	0	79.531	1497400000	19	G3X8X7;Q920Q4;Q920Q4-2;A2BI90	G3X8X7;Q920Q4;Q920Q4-2	Vacuolar protein sorting-associated protein 16 homolog	Vps16
NaN	NaN	NaN	NaN	NaN	26.7119	26.7042	26.4179		9	9	9	41.8	41.8	41.8	28.152	0	78.547	1645000000	16	Q9CQE8	Q9CQE8	UPF0568 protein C14orf166 homolog
NaN	NaN	NaN	NaN	26.4833	26.1379	26.7727	26.4387	+	6	6	6	42.8	42.8	42.8	24.707	0	78.231	1410100000	9	O88587-2;O88587;D3Z227	O88587-2;O88587	Catechol O-methyltransferase	Comt
NaN	NaN	NaN	NaN	26.8662	26.4441	26.45	27.1869	+	2	2	2	22.8	22.8	22.8	16.284	0	76.974	1090900000	9	Q9DCC8;A0A1D5RLZ6	Q9DCC8;A0A1D5RLZ6	Mitochondrial import receptor subunit TOM20 homolog	Tomm20
NaN	NaN	NaN	NaN	27.9806	27.8018	27.7048	27.5796	+	8	8	8	34.6	34.6	34.6	43.528	0	74.52	2329200000	21	O35465;O35465-2;F6WP10	O35465;O35465-2	Peptidyl-prolyl cis-trans isomerase FKBP8	Fkbp8
NaN	NaN	NaN	NaN	27.7739	27.1304	28.3592	27.202	+	8	8	8	60.4	60.4	60.4	16.137	0	69.961	2625500000	18	D3Z645;Q9QZ88;D3YYD5;Q9QZ88-2;D3YW98	D3Z645;Q9QZ88;D3YYD5;Q9QZ88-2;D3YW98	Vacuolar protein sorting-associated protein 29	Vps29
NaN	NaN	NaN	NaN	26.8021	26.4752	26.8301	26.6775	+	9	9	9	24.8	24.8	24.8	59.266	0	68.308	1284800000	10	Q921X9	Q921X9	Protein disulfide-isomerase A5	Pdia5
NaN	NaN	NaN	NaN	27.6899	26.8598	26.5614	26.4156	+	7	7	1	19.6	19.6	2.8	73.963	0	68.205	1334700000	13	D3Z7P3;D3Z7P4;F6U529;F7B327;F6RDM4	D3Z7P3;D3Z7P4	Glutaminase kidney isoform, mitochondrial	Gls
NaN	NaN	NaN	NaN	27.7204	27.4516	28.1019	27.5686	+	5	5	5	34.7	34.7	34.7	29.435	0	67.877	2171200000	16	O08579;I7HJS1;Q3THM8;B7FAU5;D6RFS0	O08579;I7HJS1;Q3THM8;B7FAU5	Emerin	Emd
NaN	NaN	NaN	NaN	27.1931	26.4052	26.3331	26.4315	+	3	3	3	19.2	19.2	19.2	32.898	0	67.688	1014100000	10	Q7TMG8;O55126;A0A0G2JEV1	Q7TMG8;O55126	Protein NipSnap homolog 2	Gbas
NaN	NaN	NaN	NaN	26.1557	28.543	28.1399	28.2567	+	7	7	7	34	34	34	23.384	0	67.23	2915900000	18	Q60817;P70670	Q60817;P70670	Nascent polypeptide-associated complex subunit alpha;Nascent polypeptide-associated complex subunit alpha, muscle-specific form	Naca
NaN	NaN	NaN	NaN	26.9757	27.2144	27.4865	27.2199	+	6	6	6	20	20	20	34.515	0	66.43	1638000000	12	E9Q855;Q3UXS0;O35609	E9Q855;Q3UXS0;O35609	Secretory carrier-associated membrane protein 3	Scamp3
NaN	NaN	NaN	NaN	27.8896	27.9237	28.2789	28.3951	+	9	9	7	32	32	26.6	68.393	0	65.268	3098200000	16	O88487;A2BFF8;Q3TPJ8;A2BFF9;A2BFF5	O88487;A2BFF8;Q3TPJ8;A2BFF9;A2BFF5	Cytoplasmic dynein 1 intermediate chain 2	Dync1i2
NaN	NaN	NaN	NaN	25.9714	26.1272	26.4644	26.0853	+	4	4	4	14.4	14.4	14.4	56.459	0	65.233	804670000	7	A0A0R4J078;Q8VCH8	A0A0R4J078;Q8VCH8	UBX domain-containing protein 4	Ubxn4
NaN	NaN	NaN	NaN	24.3774	25.4544	26.253	24.8375	+	12	3	3	37.1	12	12	46.402	0	64.753	504230000	6	P10630;P10630-2;Q8BTU6;E9Q561;A0A338P6X5;A2AFK7;E9PV04;A0A0N4SVP8;Q91VC3;D6RJ60;D6RJ11;A0A0N4SVM5	P10630;P10630-2;Q8BTU6;E9Q561;A0A338P6X5	Eukaryotic initiation factor 4A-II;Eukaryotic initiation factor 4A-II, N-terminally processed	Eif4a2
NaN	NaN	NaN	NaN	25.9364	26.2371	25.645	25.827	+	4	4	4	3	3	3	272.22	0	64.639	793510000	8	A0A0U1RNJ1;P19096	A0A0U1RNJ1;P19096	Fatty acid synthase;[Acyl-carrier-protein] S-acetyltransferase;[Acyl-carrier-protein] S-malonyltransferase;3-oxoacyl-[acyl-carrier-protein] synthase;3-oxoacyl-[acyl-carrier-protein] reductase;3-hydroxyacyl-[acyl-carrier-protein] dehydratase;Enoyl-[acyl-carrier-protein] reductase;Oleoyl-[acyl-carrier-protein] hydrolase	Fasn
NaN	NaN	NaN	NaN	26.3884	26.0693	26.6428	26.2273	+	7	7	7	6	6	6	213.74	0	62.505	1127600000	17	A0A0R4J2D3;Q8BI84;Q8BI84-2;Q8BI84-3;A0A0A6YX61	A0A0R4J2D3;Q8BI84;Q8BI84-2	Melanoma inhibitory activity protein 3	Mia3
NaN	NaN	NaN	NaN	27.5646	27.2915	26.9069	27.3542	+	10	10	10	18.8	18.8	18.8	113.23	0	61.322	1830100000	23	H7BX01;P58281;P58281-2;E0CXD1;F6U775	H7BX01;P58281;P58281-2;E0CXD1	Dynamin-like 120 kDa protein, mitochondrial;Dynamin-like 120 kDa protein, form S1	Opa1
NaN	NaN	NaN	NaN	25.9572	24.8736	25.7769	25.5626	+	3	3	3	11.8	11.8	11.8	36.566	0	60.971	518090000	8	Q80X95;G3UYP1;Q6NTA4	Q80X95	Ras-related GTP-binding protein A	Rraga
NaN	NaN	NaN	NaN	27.736	27.2019	26.8925	26.8238	+	8	8	8	44.3	44.3	44.3	36.118	0	60.829	1501400000	15	O35459;F7B227	O35459;F7B227	Delta(3,5)-Delta(2,4)-dienoyl-CoA isomerase, mitochondrial	Ech1
NaN	NaN	NaN	NaN	25.9071	25.3341	25.3473	25.5628	+	3	3	3	18.3	18.3	18.3	35.774	0	59.838	503770000	5	O70400;S4R1V0	O70400;S4R1V0	PDZ and LIM domain protein 1	Pdlim1
NaN	NaN	NaN	NaN	26.932	27.0393	26.998	26.5199	+	5	5	5	22.1	22.1	22.1	41.207	0	59.696	1444300000	17	Q9R0A0	Q9R0A0	Peroxisomal membrane protein PEX14	Pex14
NaN	NaN	NaN	NaN	26.0649	25.8306	25.5572	26.0523	+	3	3	3	21.7	21.7	21.7	29.758	0	59.572	656390000	9	O88441	O88441	Metaxin-2	Mtx2
NaN	NaN	NaN	NaN	27.2556	26.7231	27.7717	27.2252	+	6	6	6	23.8	23.8	23.8	47.622	0	57.756	1762900000	13	Q7TNC9;Q7TNC9-2;Q3TZT4	Q7TNC9;Q7TNC9-2;Q3TZT4		Inpp5a
NaN	NaN	NaN	NaN	26.1018	24.8251	27.4981	26.1452	+	8	8	8	11	11	11	138.36	0	57.675	956570000	11	E9QLA5;Q0GNC1-3;Q0GNC1;A0A1Y7VM80	E9QLA5;Q0GNC1-3;Q0GNC1;A0A1Y7VM80	Inverted formin-2	Inf2
NaN	NaN	NaN	NaN	26.8479	26.5418	26.6033	26.7437	+	4	4	4	34.7	34.7	34.7	23.991	0	57.621	1168300000	13	A0A0R4IZW9;Q9DCT5	A0A0R4IZW9;Q9DCT5	Stromal cell-derived factor 2	Sdf2
NaN	NaN	NaN	NaN	25.8085	27.6687	27.9127	27.7261	+	5	5	5	52.5	52.5	52.5	17.699	0	57.52	2107700000	10	Q64152-2;Q64152	Q64152-2;Q64152	Transcription factor BTF3	Btf3
NaN	NaN	NaN	NaN	26.4818	26.1003	26.83	25.8616	+	4	4	4	27.5	27.5	27.5	33.589	0	56.433	919430000	7	E9Q137;E9Q137-2	E9Q137;E9Q137-2		Tex264
NaN	NaN	NaN	NaN	26.0535	25.8358	25.6513	25.8284	+	2	2	2	2.2	2.2	2.2	174.06	0	55.051	585560000	5	Q80U72;Q80U72-4;Q80U72-2;Q80U72-3	Q80U72;Q80U72-4;Q80U72-2;Q80U72-3	Protein scribble homolog	Scrib
NaN	NaN	NaN	NaN	26.8862	26.1621	26.2236	25.9224	+	3	3	3	21.6	21.6	21.6	26.925	0	54.868	996370000	11	O88983	O88983	Syntaxin-8	Stx8
NaN	NaN	NaN	NaN	NaN	24.9965	25.6491	25.0385		3	3	3	4.2	4.2	4.2	148.58	0	54.366	333950000	4	G3UYG6;Q6Y7W8;E9Q2M5;G3UYR9;G3UWR2;G3UZX7;Q6Y7W8-2	G3UYG6;Q6Y7W8;E9Q2M5;G3UYR9;G3UWR2	PERQ amino acid-rich with GYF domain-containing protein 2	Gigyf2
NaN	NaN	NaN	NaN	NaN	25.5018	24.9931	24.5458		3	3	3	5.6	5.6	5.6	94.128	0	53.516	335280000	7	A6H5Z3;A6H5Z3-2	A6H5Z3;A6H5Z3-2	Exocyst complex component 6B	Exoc6b
NaN	NaN	NaN	NaN	26.3238	26.355	26.1914	NaN		5	3	3	9.3	6	6	81.8	0	52.918	1594800000	3	Q02257	Q02257	Junction plakoglobin	Jup
NaN	NaN	NaN	NaN	26.3871	26.2463	26.7972	26.4185	+	4	2	2	30.7	10.4	10.4	17.862	0	52.672	986300000	7	B0QZN5;P63044;A0A0N4SUV3;D3YTU0;Q62442-2;Q62442	B0QZN5;P63044	Vesicle-associated membrane protein 2	Vamp2
NaN	NaN	NaN	NaN	26.0012	25.7017	25.6573	26.1255	+	3	3	3	37.1	37.1	37.1	23.039	0	52.639	598200000	6	A0A286YDF2;O89116;Q5FWJ7	A0A286YDF2;O89116;Q5FWJ7	Vesicle transport through interaction with t-SNAREs homolog 1A	Vti1a
NaN	NaN	NaN	NaN	27.8235	27.3654	27.6443	26.8997	+	7	1	1	39.8	17.7	17.7	20.246	0	51.189	2408400000	12	A0A1W2P768;P84228;F8WI35;E0CYR7;E0CYN1	A0A1W2P768;P84228;F8WI35	Histone H3.2;Histone H3	Hist1h3b;H3f3a
NaN	NaN	NaN	NaN	25.1026	24.4625	24.201	NaN		2	2	2	22	22	22	14.015	0	50.746	216640000	3	Q9CQM5	Q9CQM5	Thioredoxin domain-containing protein 17	Txndc17
NaN	NaN	NaN	NaN	26.4083	26.0873	26.7056	27.059	+	6	6	6	11.8	11.8	11.8	94.66	0	50.673	1441800000	9	Q3UHJ0-2;Q3UHJ0;A0A0N4SVA1;A0A571BDM4;Q91Z96-2;Q91Z96	Q3UHJ0-2;Q3UHJ0	AP2-associated protein kinase 1	Aak1
NaN	NaN	NaN	NaN	27.3116	26.1437	26.58	25.8545	+	6	6	6	8.4	8.4	8.4	115.04	0	49.241	1058500000	11	P11688	P11688	Integrin alpha-5;Integrin alpha-5 heavy chain;Integrin alpha-5 light chain	Itga5
NaN	NaN	NaN	NaN	25.7646	26.6955	26.8324	27.2272	+	6	6	6	20.6	20.6	20.6	45.745	0	49.082	1305900000	9	Q9QYJ0	Q9QYJ0	DnaJ homolog subfamily A member 2	Dnaja2
NaN	NaN	NaN	NaN	26.224	26.5914	26.8028	26.6722	+	3	3	3	42.7	42.7	42.7	14.677	0	48.45	1037200000	7	Q8K273	Q8K273	Membrane magnesium transporter 1	Mmgt1
NaN	NaN	NaN	NaN	NaN	25.4886	25.3334	25.6873		3	3	3	8.8	8.8	8.8	88.924	0	48.075	433490000	5	E9QAJ9;Q3UIA2-4;Q3UIA2-3;Q3UIA2-2;Q3UIA2;A0A0U1RNM6	E9QAJ9;Q3UIA2-4;Q3UIA2-3;Q3UIA2-2;Q3UIA2;A0A0U1RNM6	Rho GTPase-activating protein 17	Arhgap17
NaN	NaN	NaN	NaN	26.798	27.3506	27.4782	27.3916	+	7	7	7	27.7	27.7	27.7	33.24	0	47.267	1661100000	17	Q9R1R8;Q9QYF1	Q9R1R8;Q9QYF1	Retinol dehydrogenase 11	Rdh11
NaN	NaN	NaN	NaN	25.5096	25.4484	25.4745	25.7502	+	4	4	4	4.5	4.5	4.5	136.33	0	47.021	513040000	9	Q6ZQ38	Q6ZQ38	Cullin-associated NEDD8-dissociated protein 1	Cand1
NaN	NaN	NaN	NaN	26.8392	26.3665	27.1052	26.1702	+	10	10	10	17.9	17.9	17.9	94.138	0	46.96	1235900000	18	Q3TZZ7;Q3TZZ7-2;A0A1Y7VM39	Q3TZZ7	Extended synaptotagmin-2	Esyt2
NaN	NaN	NaN	NaN	27.0716	26.6077	26.9015	26.3268	+	10	4	4	68.3	42.6	42.6	20.642	0	46.922	1394700000	16	Q80ZJ1;Q80ZJ1-2;Q8BU31	Q80ZJ1;Q80ZJ1-2;Q8BU31	Ras-related protein Rap-2a;Ras-related protein Rap-2c	Rap2a;Rap2c
NaN	NaN	NaN	NaN	27.5075	27.2533	27.858	27.6089	+	10	10	10	41.4	41.4	41.4	46.434	0	46.663	2128300000	16	Q9D7N9	Q9D7N9	Adipocyte plasma membrane-associated protein	Apmap
NaN	NaN	NaN	NaN	25.6404	25.4699	25.2849	25.3664	+	4	4	4	31.5	31.5	31.5	27.254	0	46.149	488460000	6	Q9CQ60;Q8CBG6;D3Z4X1;F6X8L5	Q9CQ60;Q8CBG6;D3Z4X1	6-phosphogluconolactonase	Pgls
NaN	NaN	NaN	NaN	26.1354	26.4279	26.7923	26.5197	+	7	7	7	42.4	42.4	42.4	13.719	0	46.005	1030400000	10	Q9WV95	Q9WV95	Pleckstrin homology-like domain family A member 3	Phlda3
NaN	NaN	NaN	NaN	27.2404	26.7239	27.7773	27.513	+	5	5	5	28.8	28.8	28.8	31.172	0	45.154	1916800000	12	P24668	P24668	Cation-dependent mannose-6-phosphate receptor	M6pr
NaN	NaN	NaN	NaN	NaN	25.5007	25.9817	25.7488		3	3	3	11.5	11.5	11.5	30.381	0	44.722	525670000	8	Q64310;E0CXD9	Q64310;E0CXD9	Surfeit locus protein 4	Surf4
NaN	NaN	NaN	NaN	25.9456	27.5527	27.4463	26.8517	+	10	10	6	23.9	23.9	11.5	63.239	0	44.539	1571200000	18	A0A2I3BQP6;Q923T9-3;Q923T9-2;Q923T9;Q5SVI9;Q5SVJ1;Q5SVI3;Q5SVI0;Q5SVI2;Q68EG2;Q5SVI1;Q5SVJ0;P28652;A0A286YCW8;A0A286YCB8;A0A286YDL6;A0A286YDK9;A0A286YCH4	A0A2I3BQP6;Q923T9-3;Q923T9-2;Q923T9;Q5SVI9;Q5SVJ1;Q5SVI3;Q5SVI0;Q5SVI2;Q68EG2;Q5SVI1;Q5SVJ0;P28652;A0A286YCW8	Calcium/calmodulin-dependent protein kinase type II subunit gamma;Calcium/calmodulin-dependent protein kinase type II subunit beta	Camk2g;Camk2b
NaN	NaN	NaN	NaN	28.1417	28.1897	28.6971	28.0146	+	14	14	14	43.9	43.9	43.9	47.404	0	44.182	3629100000	30	Q9DBE8;F6RBY3	Q9DBE8;F6RBY3	Alpha-1,3/1,6-mannosyltransferase ALG2	Alg2
NaN	NaN	NaN	NaN	26.9083	26.3511	26.5459	26.8212	+	5	4	4	21.1	14.9	14.9	41.626	0	43.893	1082600000	9	Q9R0Q6;A0A0G2JF52;D3YVI5	Q9R0Q6;A0A0G2JF52	Actin-related protein 2/3 complex subunit 1A	Arpc1a
NaN	NaN	NaN	NaN	25.9046	26.3048	26.8635	26.2761	+	12	12	12	31.3	31.3	31.3	58.016	0	43.661	952970000	17	A0A0N4SUV6;Q9JHW4;A0A0N4SUU3;A0A0N4SWB3;A0A0N4SVA4;A0A0N4SWD9	A0A0N4SUV6;Q9JHW4	Selenocysteine-specific elongation factor	Eefsec
NaN	NaN	NaN	NaN	27.6079	29.0436	27.968	28.2211	+	5	5	5	23	23	23	51.688	0	42.97	3355300000	13	E9PYN1;Q8R5M8-7;Q8R5M8-6;Q8R5M8-4;Q8R5M8-3;Q8R5M8-2;Q8R5M8;A0A668KLV1;E0CY16;Q8R5M8-5	E9PYN1;Q8R5M8-7;Q8R5M8-6;Q8R5M8-4;Q8R5M8-3;Q8R5M8-2;Q8R5M8;A0A668KLV1;E0CY16;Q8R5M8-5	Cell adhesion molecule 1	Cadm1
NaN	NaN	NaN	NaN	24.9257	24.8776	24.6047	25.1199	+	3	3	3	8.9	8.9	8.9	64.622	0	42.153	410860000	8	Q8BTW9	Q8BTW9	Serine/threonine-protein kinase PAK 4	Pak4
NaN	NaN	NaN	NaN	28.1642	27.6771	28.0153	28.4266	+	6	6	3	64	64	38.2	10.35	0	41.769	3154400000	18	Q9D0M5;D6RIN4	Q9D0M5	Dynein light chain 2, cytoplasmic	Dynll2
NaN	NaN	NaN	NaN	26.3657	27.3543	27.7765	27.0881	+	9	9	9	32.4	32.4	32.4	39.832	0	41.451	1766900000	13	Q91WK2	Q91WK2	Eukaryotic translation initiation factor 3 subunit H	Eif3h
NaN	NaN	NaN	NaN	26.5319	26.1713	25.6929	26.1992	+	6	6	6	32.9	32.9	32.9	38.384	0	41.161	1040000000	15	Q99JB2;A2AG41;A2AG39;F6WI02	Q99JB2;A2AG41;A2AG39;F6WI02	Stomatin-like protein 2, mitochondrial	Stoml2
NaN	NaN	NaN	NaN	25.0693	25.0773	25.7477	25.8862	+	7	3	3	18.1	10.8	10.8	58.951	0	41.036	453060000	4	Q80SW1;F7ATQ6;D3Z2Q0	Q80SW1	Putative adenosylhomocysteinase 2	Ahcyl1
NaN	NaN	NaN	NaN	27.9411	28.0353	27.9709	27.9544	+	9	9	9	43.5	43.5	43.5	37.402	0	40.929	2800400000	22	Q9R062;V9GX26;K3W4S6	Q9R062;V9GX26;K3W4S6	Glycogenin-1	Gyg1;Gyg
NaN	NaN	NaN	NaN	24.8698	24.9287	25.3438	NaN		4	4	4	6	6	6	124.86	0	40.877	381340000	5	V9GXF0;V9GXP8;F8VPM7;Q99MI1;V9GWT6;V9GXH3;Q99MI1-2;V9GX53;V9GXL1;A0A1B0GS69;Q3UHT7;Q99MI1-4;Q6PH08-4;Q6PH08;Q6PH08-3	V9GXF0;V9GXP8;F8VPM7;Q99MI1;V9GWT6;V9GXH3;Q99MI1-2;V9GX53	ELKS/Rab6-interacting/CAST family member 1	Erc1
NaN	NaN	NaN	NaN	27.5782	27.2271	27.017	27.5048	+	6	6	6	28.6	28.6	28.6	46.719	0	40.762	1587600000	10	P59017;A0A0N4SW24;A0A0N4SW63	P59017	Bcl-2-like protein 13	Bcl2l13
NaN	NaN	NaN	NaN	27.7547	27.2462	27.4302	27.7445	+	13	13	13	25.8	25.8	25.8	91.622	0	40.156	1915400000	22	D3Z3B8;H7BWY4;E9Q9H0;Q811D0-2;Q811D0;Q811D0-3;F6UDT8;S4R2T8;D3YUZ8;E9Q2L2;A0A571BEK3;A0A571BEZ4;A0A338P6J0;Q91XM9-3;Q91XM9-6;Q91XM9-8;Q91XM9;Q91XM9-2;Q91XM9-4;Q91XM9-7;A0A338P7H1;A0A338P713;E9Q3Z8;B1AR31;A0A338P6L4;A0A338P6H5;D3YWU0;A2BEF2;A0A338P6E5;G3UZL5;A0A338P6I6;Q52KF7;A2BEE9;Q91XM9-5;Q62108-3;Q62108;Q62108-2;P70175	D3Z3B8;H7BWY4;E9Q9H0;Q811D0-2;Q811D0;Q811D0-3;F6UDT8	Disks large homolog 1	Dlg1
NaN	NaN	NaN	NaN	25.4529	25.2469	25.4912	25.1428	+	7	1	1	52.9	23.5	23.5	15.404	0	40.05	425880000	4	P68433	P68433	Histone H3.1	Hist1h3a
NaN	NaN	NaN	NaN	26.104	25.721	25.6852	25.3639	+	5	5	5	7.1	7.1	7.1	106.91	0	39.511	624120000	7	Q8BGQ7	Q8BGQ7	Alanine--tRNA ligase, cytoplasmic	Aars
NaN	NaN	NaN	NaN	25.6331	NaN	25.2861	25.4689		4	3	3	13.9	10.6	10.6	46.167	0	39.443	389580000	4	P31324;H3BK84	P31324;H3BK84	cAMP-dependent protein kinase type II-beta regulatory subunit	Prkar2b
NaN	NaN	NaN	NaN	28.3598	27.4192	27.5678	27.3739	+	6	6	6	61.3	61.3	61.3	13.373	0	39.396	2158600000	13	Q8R404	Q8R404	Protein QIL1	Qil1
NaN	NaN	NaN	NaN	26.2564	26.3374	26.058	25.9708	+	2	2	2	12.7	12.7	12.7	24.038	0	38.094	823460000	13	Q8K3J1;A0A494BAW8	Q8K3J1;A0A494BAW8	NADH dehydrogenase [ubiquinone] iron-sulfur protein 8, mitochondrial	Ndufs8
NaN	NaN	NaN	NaN	26.5657	26.7127	26.6506	26.1224	+	3	3	3	31.1	31.1	31.1	16.564	0	37.565	1172800000	8	Q9D6K8;Q9D9Q3	Q9D6K8	FUN14 domain-containing protein 2	Fundc2
NaN	NaN	NaN	NaN	25.4061	27.7163	27.6499	26.7523	+	10	10	1	16.7	16.7	1	107.24	0	37.307	1643700000	17	Q80X50-2;Q80X50-4;Q80X50;A0A0H2UH17;A0A0G2JDV6;Q80X50-3;A0A0G2JDT1;A0A0G2JGD0;A0A0G2JG47;A0A0G2JE24;A0A0G2JFN7	Q80X50-2;Q80X50-4;Q80X50;A0A0H2UH17;A0A0G2JDV6;Q80X50-3	Ubiquitin-associated protein 2-like	Ubap2l
NaN	NaN	NaN	NaN	27.2113	26.879	27.3119	27.3036	+	17	6	6	84.6	37.3	37.3	22.187	0	36.932	1484000000	13	Q9D1G1;A0A494B945;A0A494BA38;A0A494BBL7	Q9D1G1;A0A494B945;A0A494BA38;A0A494BBL7	Ras-related protein Rab-1B	Rab1b
NaN	NaN	NaN	NaN	25.969	26.0581	26.5678	25.9191	+	6	6	6	18.2	18.2	18.2	52.471	0	36.903	940820000	11	Q3TDN2;Q3TDN2-2;D3YUP4;D3Z2H4	Q3TDN2;Q3TDN2-2	FAS-associated factor 2	Faf2
NaN	NaN	NaN	NaN	NaN	26.375	24.5329	24.4284		5	5	5	12.2	12.2	12.2	76.249	0	36.359	482110000	6	Q08642	Q08642	Protein-arginine deiminase type-2	Padi2
NaN	NaN	NaN	NaN	26.1621	26.1953	26.7899	26.3068	+	5	5	5	22.9	22.9	22.9	49.593	0	36.127	939320000	5	P35821	P35821	Tyrosine-protein phosphatase non-receptor type 1	Ptpn1
NaN	NaN	NaN	NaN	26.2182	26.1789	26.1483	26.279	+	4	4	4	14.9	14.9	14.9	38.361	0	35.731	986380000	8	Q3UF75;Q9EPC1	Q3UF75;Q9EPC1	Alpha-parvin	Parva
NaN	NaN	NaN	NaN	27.3463	27.3301	26.7369	26.8423	+	6	6	6	37.4	37.4	37.4	37.895	0	35.519	1426300000	11	Q9QYA2;G3UY77	Q9QYA2	Mitochondrial import receptor subunit TOM40 homolog	Tomm40
NaN	NaN	NaN	NaN	26.7507	25.8993	26.0132	25.5238	+	5	5	5	16.8	16.8	16.8	52.28	0	35.498	1009100000	8	Q99LJ1	Q99LJ1	Tissue alpha-L-fucosidase	Fuca1
NaN	NaN	NaN	NaN	28.0897	27.7794	27.5957	27.8041	+	5	5	5	67.8	67.8	67.8	10	0	35.486	2839700000	15	P31786;Q4VWZ5;M0QWU8;D3Z563	P31786;Q4VWZ5;M0QWU8	Acyl-CoA-binding protein	Dbi
NaN	NaN	NaN	NaN	26.4922	26.4578	26.4777	26.1948	+	13	5	5	21.3	11.3	11.3	104.02	0	35.055	865700000	10	P17427	P17427	AP-2 complex subunit alpha-2	Ap2a2
NaN	NaN	NaN	NaN	26.7133	26.6877	26.0868	25.833	+	3	3	3	11.9	11.9	11.9	53.748	0	34.533	1031400000	5	P50428;F6QGM0	P50428	Arylsulfatase A	Arsa
NaN	NaN	NaN	NaN	25.7928	25.2392	25.1601	25.4507	+	2	2	2	12	12	12	32.131	0	34.516	461300000	8	Q9EQI8	Q9EQI8	39S ribosomal protein L46, mitochondrial	Mrpl46
NaN	NaN	NaN	NaN	26.8806	26.9997	27.2727	26.8154	+	9	9	9	12.5	12.5	12.5	132.39	0	34.475	1442700000	12	Q9EPE9;A0A571BD32	Q9EPE9	Manganese-transporting ATPase 13A1	Atp13a1
NaN	NaN	NaN	NaN	26.1996	26.1583	26.7338	26.1628	+	7	7	7	22.3	22.3	22.3	54.257	0	34.162	1228100000	9	Q2TBE6;A0A494BBQ4	Q2TBE6;A0A494BBQ4	Phosphatidylinositol 4-kinase type 2-alpha	Pi4k2a
NaN	NaN	NaN	NaN	26.2237	26.9134	26.3789	26.7633	+	7	7	7	10.6	10.6	10.6	86.805	0	34.112	1047900000	15	Q8VEK3-2;Q8VEK3	Q8VEK3-2;Q8VEK3	Heterogeneous nuclear ribonucleoprotein U	Hnrnpu
NaN	NaN	NaN	NaN	26.0339	25.8458	26.4359	26.256	+	8	8	8	5.1	5.1	5.1	288.79	0	33.049	799520000	7	Q9JLN9;Q9JLN9-2	Q9JLN9	Serine/threonine-protein kinase mTOR	Mtor
NaN	NaN	NaN	NaN	NaN	25.6919	25.4407	25.5657		4	4	4	14.8	14.8	14.8	28.78	0	32.945	490660000	7	P70122;F6TN03;D6REV5	P70122;F6TN03	Ribosome maturation protein SBDS	Sbds
NaN	NaN	NaN	NaN	26.942	25.9624	26.451	26.0829	+	10	5	4	36.7	24.8	20.9	47.953	0	32.772	821400000	8	Q99KH8	Q99KH8	Serine/threonine-protein kinase 24;Serine/threonine-protein kinase 24 35 kDa subunit;Serine/threonine-protein kinase 24 12 kDa subunit	Stk24
NaN	NaN	NaN	NaN	26.8992	26.331	26.2252	26.7436	+	7	7	5	29.1	29.1	25.1	40.079	0	32.621	1084600000	10	Q91YR1	Q91YR1	Twinfilin-1	Twf1
NaN	NaN	NaN	NaN	25.849	24.1595	26.0921	23.2054	+	2	2	2	34.5	34.5	34.5	9.5418	0	31.468	436820000	6	A0A2R8VJV3;Q8R3M1;P61924	A0A2R8VJV3;Q8R3M1;P61924	Coatomer subunit zeta-1	Copz1
NaN	NaN	NaN	NaN	26.0047	26.4415	26.8765	26.2872	+	4	4	4	22.7	22.7	22.7	37.357	0	30.693	957520000	15	A0A0F6AIX5;Q8BVA5;A0A1W2P6J8;A0A1W2P6L7;A0A0F6AIX6;A0A1W2P7C8;Q8BVA5-2;A0A1W2P818;A0A1W2P7T7;A0A1W2P820;Q8BVA5-3	A0A0F6AIX5;Q8BVA5;A0A1W2P6J8;A0A1W2P6L7;A0A0F6AIX6;A0A1W2P7C8;Q8BVA5-2	UPF0554 protein C2orf43 homolog
NaN	NaN	NaN	NaN	25.7575	26.042	26.3246	25.7637	+	6	6	6	7.8	7.8	7.8	162.03	0	30.551	733940000	9	A2AG68;Q64430	A2AG68;Q64430	Copper-transporting ATPase 1	Atp7a
NaN	NaN	NaN	NaN	28.2062	27.0495	26.8118	27.6416	+	4	4	4	33.1	33.1	33.1	28.09	0	30.391	1804800000	7	Q9D172;A0A1W2P7B6	Q9D172;A0A1W2P7B6	ES1 protein homolog, mitochondrial	D10Jhu81e
NaN	NaN	NaN	NaN	27.106	27.2112	26.9384	27.0622	+	5	5	5	11.4	11.4	11.4	55.986	0	30.275	1468000000	11	P97797-2;P97797;P97797-4;P97797-3;E0CX65;A2ANC1	P97797-2;P97797;P97797-4;P97797-3	Tyrosine-protein phosphatase non-receptor type substrate 1	Sirpa
NaN	NaN	NaN	NaN	25.5344	25.8634	25.4793	NaN		5	5	4	6.1	6.1	5.3	160.61	0	30.206	525380000	7	F8VPK5;A0A1Y7VMN0;P70336;P70336-2;A0A1Y7VLD1;A0A3Q4L2X0	F8VPK5;A0A1Y7VMN0;P70336;P70336-2	Rho-associated protein kinase;Rho-associated protein kinase 2	Rock2
NaN	NaN	NaN	NaN	25.5464	25.2443	25.3056	25.4281	+	5	5	5	9.9	9.9	9.9	75.127	0	29.584	463880000	6	Q8CBM2;A2AL85;Q8BSY0	Q8CBM2;A2AL85;Q8BSY0	Aspartyl/asparaginyl beta-hydroxylase	Asph
NaN	NaN	NaN	NaN	25.8407	25.5196	25.4742	25.7874	+	5	5	5	5.1	5.1	5.1	151.05	0	29.153	637640000	12	A0A0G2JFV3;A0A0G2JDE3;A0A0G2JG66;A0A0G2JDF4;A0A0G2JFF5;A0A0G2JDK6;A0A0G2JGM8;Q8JZZ7;Q8JZZ7-2;A0A0G2JEQ8;A0A0G2JH16;Q0P6A0;A0A0G2JGC2	A0A0G2JFV3;A0A0G2JDE3;A0A0G2JG66;A0A0G2JDF4;A0A0G2JFF5;A0A0G2JDK6;A0A0G2JGM8;Q8JZZ7;Q8JZZ7-2;A0A0G2JEQ8;A0A0G2JH16	Latrophilin-2	Lphn2
NaN	NaN	NaN	NaN	27.1744	26.8243	26.4063	26.8782	+	4	4	3	13.5	13.5	11	49.573	0	29.042	1120400000	10	D3YXT0;Q91WD5	D3YXT0;Q91WD5	NADH dehydrogenase [ubiquinone] iron-sulfur protein 2, mitochondrial	Ndufs2
NaN	NaN	NaN	NaN	26.5456	27.1481	27.4372	26.7839	+	8	8	6	26.6	26.6	21.8	46.936	0	28.978	1848400000	14	Q9JKC8;H7BWY2;A0A286YDZ6;D3YWU3;D3YXV9;D6RI63	Q9JKC8;H7BWY2;A0A286YDZ6	AP-3 complex subunit mu-1	Ap3m1
NaN	NaN	NaN	NaN	28.3779	27.079	27.1526	26.9173	+	2	2	2	19.2	19.2	19.2	10.678	0	28.959	1730000000	12	Q8CF66	Q8CF66	Ragulator complex protein LAMTOR4;Ragulator complex protein LAMTOR4, N-terminally processed	Lamtor4
NaN	NaN	NaN	NaN	26.7614	25.778	26.1372	26.1059	+	5	5	5	19	19	19	44.774	0	28.814	782030000	7	F8WIV2;Q60854;K7E6F1;E9PZQ9;E9Q4R2;E9PYY0;E9Q3Y1;E9Q6X2;E9Q108;E9Q0P9	F8WIV2;Q60854;K7E6F1	Serpin B6	Serpinb6a;Serpinb6
NaN	NaN	NaN	NaN	25.2831	25.7236	27.3877	26.0543	+	7	7	7	13.8	13.8	13.8	88.047	0	28.811	1114100000	11	Q80WQ2;A0A1D5RLY2;A0A1D5RLN5	Q80WQ2;A0A1D5RLY2;A0A1D5RLN5	Protein VAC14 homolog	Vac14
NaN	NaN	NaN	NaN	25.7216	26.2963	26.3608	26.2637	+	6	6	6	14.9	14.9	14.9	63.953	0	28.805	849640000	6	P06801;Q3TQP6	P06801;Q3TQP6	NADP-dependent malic enzyme;Malic enzyme	Me1
NaN	NaN	NaN	NaN	27.1706	27.3315	26.9767	27.1892	+	3	3	3	41.1	41.1	41.1	10.458	0	28.166	1924400000	9	P62075;A0A1W2P7H2;A0A1W2P756	P62075;A0A1W2P7H2	Mitochondrial import inner membrane translocase subunit Tim13	Timm13
NaN	NaN	NaN	NaN	25.5595	26.0994	25.4089	26.0418	+	6	6	6	9.5	9.5	9.5	117.51	0	28.082	593140000	8	E9Q3E2;Q8CC35-2;Q8CC35-3;Q8CC35	E9Q3E2;Q8CC35-2;Q8CC35-3;Q8CC35	Synaptopodin	Synpo
NaN	NaN	NaN	NaN	25.7716	26.0548	26.2059	26.2793	+	2	2	2	2.6	2.6	2.6	97.73	0	27.953	753690000	5	D3YWD3;B1AZA5;B1AZA8	D3YWD3;B1AZA5;B1AZA8	Transmembrane protein 245	Tmem245
NaN	NaN	NaN	NaN	NaN	24.8898	25.1657	24.6868		3	3	3	6.9	6.9	6.9	38.058	0	27.923	411350000	4	Q91Y74	Q91Y74	CMP-N-acetylneuraminate-beta-galactosamide-alpha-2,3-sialyltransferase 4	St3gal4
NaN	NaN	NaN	NaN	24.1508	24.354	25.1016	23.67	+	2	2	2	4.5	4.5	4.5	80.376	0	27.713	245080000	5	Q8BIJ7	Q8BIJ7	RUN and FYVE domain-containing protein 1	Rufy1
NaN	NaN	NaN	NaN	26.4744	26.1861	26.1408	26.0262	+	6	6	6	19	19	19	54.208	0	27.626	756970000	10	Q2TPA8;B1AX78;B1AX77	Q2TPA8;B1AX78	Hydroxysteroid dehydrogenase-like protein 2	Hsdl2
NaN	NaN	NaN	NaN	26.0484	26.5195	26.214	27.1401	+	7	7	7	5.5	5.5	5.5	172.56	0	27.533	1036100000	15	A0A668KLV9;A0A668KLD3;Q9WTQ5-2;Q9WTQ5	A0A668KLV9;A0A668KLD3;Q9WTQ5-2;Q9WTQ5	A-kinase anchor protein 12	Akap12
NaN	NaN	NaN	NaN	NaN	27.3504	27.1812	26.3946		8	5	5	28.4	21.9	21.9	33.901	0	27.53	1234100000	12	O35295	O35295	Transcriptional activator protein Pur-beta	Purb
NaN	NaN	NaN	NaN	24.3257	24.1668	24.0073	23.8713	+	2	2	2	9.7	9.7	9.7	33.752	0	27.297	183820000	5	Q9CRA5;Q05BZ0;H3BJN5;H3BJ12;K3W4Q3;H3BJ82;H3BJ07;Q9CRA5-2;Q8R088-3;Q8R088	Q9CRA5;Q05BZ0;H3BJN5;H3BJ12;K3W4Q3;H3BJ82;H3BJ07;Q9CRA5-2;Q8R088-3;Q8R088	Golgi phosphoprotein 3;Golgi phosphoprotein 3-like	Golph3;Golph3l
NaN	NaN	NaN	NaN	27.2221	27.2813	27.8076	27.3824	+	6	6	6	33	33	33	25.206	0	26.757	2579900000	14	Q9ERE7;D3YVR4;F6SWV4	Q9ERE7;D3YVR4	LDLR chaperone MESD	Mesdc2
NaN	NaN	NaN	NaN	NaN	26.6402	26.9078	26.6438		4	4	4	8.3	8.3	8.3	117.83	0	26.529	941500000	9	A2AMY5;Q91VX2;A2AMY7;F6PYV5	A2AMY5;Q91VX2	Ubiquitin-associated protein 2	Ubap2
NaN	NaN	NaN	NaN	26.3445	26.5484	26.3122	26.7004	+	3	3	3	3.1	3.1	3.1	55.872	0	26.529	909680000	7	Q9Z127	Q9Z127	Large neutral amino acids transporter small subunit 1	Slc7a5
NaN	NaN	NaN	NaN	26.2978	26.176	26.2567	26.3176	+	4	4	4	44.4	44.4	44.4	11.922	0	26.118	815820000	10	P26883;F6X9I3	P26883	Peptidyl-prolyl cis-trans isomerase FKBP1A	Fkbp1a
NaN	NaN	NaN	NaN	27.5327	27.1036	27.5435	27.1572	+	5	5	5	34.6	34.6	34.6	24.251	0	25.803	1803200000	8	P59024;D3YWB6;D6RDT0	P59024;D3YWB6	Peptidyl-prolyl cis-trans isomerase FKBP14	Fkbp14
NaN	NaN	NaN	NaN	26.0399	25.6837	26.5312	25.9689	+	10	7	7	17.5	13.3	13.3	97.512	0	25.789	758230000	9	Q9QZE5;Q7TNQ1	Q9QZE5	Coatomer subunit gamma-1	Copg1
NaN	NaN	NaN	NaN	26.5067	25.9082	25.9723	25.6642	+	7	7	7	11.7	11.7	11.7	115.2	0	25.744	710720000	14	Q8VD75;A0A0J9YUA3;A0A1D5RMM7;A0A0J9YV08	Q8VD75;A0A0J9YUA3	Huntingtin-interacting protein 1	Hip1
NaN	NaN	NaN	NaN	24.8699	24.8905	25.5722	NaN		3	3	3	21.3	21.3	21.3	26.687	0	25.464	362290000	4	Q3TAS6-2;A0A0X1KG67;Q3TAS6;D3Z665	Q3TAS6-2;A0A0X1KG67;Q3TAS6	ER membrane protein complex subunit 10	Emc10
NaN	NaN	NaN	NaN	26.2385	27.0138	27.6316	27.6788	+	8	8	8	25.4	25.4	25.4	67.73	0	25.297	1692000000	13	Q5SUH7;Q5SUH6;Q99KN9-2;Q99KN9	Q5SUH7;Q5SUH6;Q99KN9-2;Q99KN9	Clathrin interactor 1	Clint1
NaN	NaN	NaN	NaN	NaN	24.4837	25.3998	24.7555		2	2	2	24.1	24.1	24.1	15.362	0	25.192	270410000	3	A0A0A0MQC9;Q9D0R8	A0A0A0MQC9;Q9D0R8	Protein LSM12 homolog	Lsm12
NaN	NaN	NaN	NaN	26.3373	26.0111	26.5818	25.9813	+	3	3	3	25	25	25	19.808	0	25.13	841140000	4	A0A1L1SR14;A0A1L1SS60;Q8BH79-2;Q8BH79-3;Q8BH79;Q8BH79-4	A0A1L1SR14;A0A1L1SS60;Q8BH79-2;Q8BH79-3;Q8BH79;Q8BH79-4	Anoctamin-10	Ano10
NaN	NaN	NaN	NaN	26.4991	25.7065	26.1721	26.0601	+	4	4	4	12	12	12	72.544	0	25.071	838100000	7	A0A0R4J1E3;Q9QXS6-3;Q9QXS6;Q9QXS6-2;F7CPL2	A0A0R4J1E3;Q9QXS6-3;Q9QXS6;Q9QXS6-2;F7CPL2	Drebrin	Dbn1
NaN	NaN	NaN	NaN	26.8317	26.8869	27.0277	26.6432	+	8	8	8	16.7	16.7	16.7	77.731	0	24.623	1279100000	13	B2RQS1;Q9ERG2	B2RQS1;Q9ERG2	Striatin-3	Strn3
NaN	NaN	NaN	NaN	26.1277	25.9745	25.9608	26.1022	+	8	8	8	9.2	9.2	9.2	144.8	0	24.561	756430000	12	Q9JJ28	Q9JJ28	Protein flightless-1 homolog	Flii
NaN	NaN	NaN	NaN	26.4436	25.387	26.1955	25.5404	+	5	5	5	7.7	7.7	7.7	100.85	0	24.498	628460000	6	A0A0R4J092;Q8K2I4;D6RGR1	A0A0R4J092;Q8K2I4	Beta-mannosidase	Manba
NaN	NaN	NaN	NaN	26.2271	26.7482	26.106	26.1837	+	4	4	4	18.6	18.6	18.6	45.325	0	24.368	864530000	8	Q9Z0M5	Q9Z0M5	Lysosomal acid lipase/cholesteryl ester hydrolase	Lipa
NaN	NaN	NaN	NaN	NaN	25.6316	25.1469	25.404		4	4	4	12.4	12.4	12.4	40.38	0	24.35	492650000	9	Q80VB6;A0A0G2JGQ6;Q9JLM8-2;Q9JLM8;A0A0G2JGR9;Q9CXL6;Q6PGI2;O88809	Q80VB6;A0A0G2JGQ6;Q9JLM8-2;Q9JLM8;A0A0G2JGR9	Serine/threonine-protein kinase DCLK1	Dclk1
NaN	NaN	NaN	NaN	26.6137	26.6647	26.1884	26.3865	+	5	5	5	30.7	30.7	30.7	20.021	0	24.03	1066900000	11	Q99LX0;A2A817;A2A816;A2A815;A2A813	Q99LX0;A2A817;A2A816;A2A815;A2A813	Protein deglycase DJ-1	Park7
NaN	NaN	NaN	NaN	27.3127	27.1042	27.3608	27.3857	+	3	3	3	27	27	27	26.31	0	24.026	1658100000	7	Q9EP72	Q9EP72	ER membrane protein complex subunit 7	Emc7
NaN	NaN	NaN	NaN	NaN	25.8828	24.6489	24.2498		6	6	5	22.9	22.9	16.2	41.275	0	23.924	339400000	8	P63085;A0A338P781;A0A338P736	P63085	Mitogen-activated protein kinase 1	Mapk1
NaN	NaN	NaN	NaN	27.2204	26.389	26.8776	26.3961	+	5	5	5	17.2	17.2	17.2	49.429	0	23.645	1391900000	15	Q8VHI3;A0A1W2P7Z1;A0A1W2P6H4	Q8VHI3	GDP-fucose protein O-fucosyltransferase 2	Pofut2
NaN	NaN	NaN	NaN	NaN	24.5606	24.2989	24.5218		2	2	2	11.8	11.8	11.8	33.692	0	23.519	202820000	4	Q91VH6;A0A3B2WCC1;A0A3B2W4I2;A0A3B2W7C9;A0A3F2YNL8	Q91VH6;A0A3B2WCC1;A0A3B2W4I2;A0A3B2W7C9;A0A3F2YNL8	Protein MEMO1	Memo1
NaN	NaN	NaN	NaN	27.3913	26.4528	27.1134	26.3663	+	7	7	7	23.7	23.7	23.7	57.621	0	23.512	1275900000	6	P17439;A0A0G2JDK2	P17439;A0A0G2JDK2	Glucosylceramidase	Gba
NaN	NaN	NaN	NaN	NaN	25.1897	24.9809	25.0248		4	4	4	4.4	4.4	4.4	176.47	0	23.491	283180000	3	Q9QZC2	Q9QZC2	Plexin-C1	Plxnc1
NaN	NaN	NaN	NaN	27.3288	27.7025	27.8157	27.6755	+	8	8	8	54.6	54.6	54.6	23.348	0	23.222	2230200000	16	O70378;M0QWP2;M0QWY0;M0QWI7;M0QWC9;M0QWS0;M0QWE2	O70378;M0QWP2;M0QWY0	ER membrane protein complex subunit 8	Emc8
NaN	NaN	NaN	NaN	25.9001	26.1488	26.698	26.5596	+	8	8	8	19	19	19	70.843	0	23.136	911350000	11	Q9JIG7	Q9JIG7	Coiled-coil domain-containing protein 22	Ccdc22
NaN	NaN	NaN	NaN	24.8925	26.3863	26.0794	26.4251	+	3	3	3	28.9	28.9	28.9	11.042	0	22.884	741880000	10	Q9WVA2;Q4FZG7	Q9WVA2;Q4FZG7	Mitochondrial import inner membrane translocase subunit Tim8 A;Putative mitochondrial import inner membrane translocase subunit Tim8 A-B	Timm8a1;Timm8a2
NaN	NaN	NaN	NaN	27.8172	27.1321	27.2252	27.4914	+	5	5	5	44.1	44.1	44.1	12.861	0	22.849	1774200000	14	P62774	P62774	Myotrophin	Mtpn
NaN	NaN	NaN	NaN	25.2881	25.2028	25.1762	25.366	+	5	5	5	9.6	9.6	9.6	85.054	0	22.825	429680000	6	D3Z158;Q8BML9;A0A140LHJ3;A0A140LJK5;A0A140LIS6;A0A140LHZ5;A0A140LJH1;A0A140LHB3;A0A140LHC3;A0A140LIR0;A0A140LJH2;A0A0A6YY08;A0A140LID3;A0A140LIN2	D3Z158;Q8BML9;A0A140LHJ3;A0A140LJK5;A0A140LIS6;A0A140LHZ5		Qars
NaN	NaN	NaN	NaN	25.7521	25.8831	26.0234	25.938	+	3	3	3	25.6	25.6	25.6	19.742	0	22.77	611590000	7	Q8VE99	Q8VE99	Coiled-coil domain-containing protein 115	Ccdc115
NaN	NaN	NaN	NaN	25.6553	25.987	25.5253	26.1903	+	9	9	9	5.3	5.3	5.3	340.69	0	22.524	659040000	13	B0V2P5;Q8BPN8-2;Q8BPN8;F6RYL8;B0V2P6;Q8BPN8-3	B0V2P5;Q8BPN8-2;Q8BPN8;F6RYL8	DmX-like protein 2	Dmxl2
NaN	NaN	NaN	NaN	28.4838	29.7171	29.7973	29.6794	+	7	7	7	66.3	66.3	66.3	10.275	0	22.359	8256300000	15	P61514;A0A1D5RL86	P61514;A0A1D5RL86	60S ribosomal protein L37a	Rpl37a
NaN	NaN	NaN	NaN	25.6847	25.163	25.111	25.0845	+	4	4	4	12.1	12.1	12.1	63.17	0	21.967	428460000	5	Q3UHB1;A0A1W2P799	Q3UHB1;A0A1W2P799	5-nucleotidase domain-containing protein 3	Nt5dc3
NaN	NaN	NaN	NaN	25.8332	25.4703	25.5013	25.6192	+	3	3	3	7.8	7.8	7.8	49.784	0	21.815	563980000	7	B7ZCL8;A2AN84;P70290;B7ZCL9	B7ZCL8;A2AN84;P70290	55 kDa erythrocyte membrane protein	Mpp1
NaN	NaN	NaN	NaN	26.2911	25.9615	NaN	26.5244		6	6	6	16.5	16.5	16.5	57.187	0	21.584	556750000	8	Q9DBJ3;Q80Y61	Q9DBJ3	Brain-specific angiogenesis inhibitor 1-associated protein 2-like protein 1	Baiap2l1
NaN	NaN	NaN	NaN	24.6979	25.698	25.4691	25.4317	+	5	5	5	2.2	2.2	2.2	298.11	0	21.557	479800000	7	S4R294;S4R2J9;A0A0A0MQ79;Q3TLH4-5;Q3TLH4;S4R2E2	S4R294;S4R2J9;A0A0A0MQ79;Q3TLH4-5;Q3TLH4	Protein PRRC2C	Prrc2c
NaN	NaN	NaN	NaN	26.9844	27.1612	27.4746	27.5359	+	7	7	7	29	29	29	29.579	0	21.397	1796300000	14	P47758;A0A1W2P830	P47758	Signal recognition particle receptor subunit beta	Srprb
NaN	NaN	NaN	NaN	26.333	26.269	26.3478	26.1273	+	4	4	4	6.3	6.3	6.3	104.21	0	21.188	1289500000	9	G5E8C4;Q8BRH0;A0A0R4J173;Q8BRH0-2	G5E8C4;Q8BRH0;A0A0R4J173;Q8BRH0-2	Transmembrane and TPR repeat-containing protein 3	Tmtc3
NaN	NaN	NaN	NaN	28.2695	27.6338	28.0751	27.6904	+	7	7	7	57.7	57.7	57.7	20.082	0	21.186	2561400000	17	P62331	P62331	ADP-ribosylation factor 6	Arf6
NaN	NaN	NaN	NaN	27.4322	26.8635	27.1343	27.017	+	4	4	4	17.8	17.8	17.8	30.537	0	20.825	1472200000	7	Q9DAU1;Q9DAU1-2	Q9DAU1;Q9DAU1-2	Protein canopy homolog 3	Cnpy3
NaN	NaN	NaN	NaN	26.1419	26.9075	26.5112	27.0528	+	7	7	7	20.8	20.8	20.8	49.03	0	20.586	1194600000	16	Q8BWY3	Q8BWY3	Eukaryotic peptide chain release factor subunit 1	Etf1
NaN	NaN	NaN	NaN	25.0532	24.802	25.1037	NaN		2	2	2	42.2	42.2	42.2	10.333	0	20.521	291010000	3	P62073	P62073	Mitochondrial import inner membrane translocase subunit Tim10	Timm10
NaN	NaN	NaN	NaN	26.7737	27.0551	25.7362	26.7494	+	4	4	4	65.2	65.2	65.2	10.344	0	20.397	1157700000	4	Q9WV98;A0A1Y7VIZ6;A0A1Y7VL11	Q9WV98;A0A1Y7VIZ6	Mitochondrial import inner membrane translocase subunit Tim9	Timm9
NaN	NaN	NaN	NaN	26.0657	26.1587	25.8806	25.4308	+	6	6	6	10.5	10.5	10.5	98.278	0	20.346	683810000	9	A0A087WNM1;Q91Z67;A0A087WSQ1;A0A087WRV4;A0A087WNR5;A0A087WS59;D3YZW1;Q91Z69	A0A087WNM1;Q91Z67;A0A087WSQ1	SLIT-ROBO Rho GTPase-activating protein 2	Srgap2
NaN	NaN	NaN	NaN	26.2552	26.4728	26.5292	24.5723	+	4	4	4	25.1	25.1	25.1	32.829	0	20.275	812790000	10	H3BKH6;Q9R0P3;H3BJP2;H3BLJ9;H3BJL6;H3BK43;H3BL99;H3BJC6	H3BKH6;Q9R0P3;H3BJP2;H3BLJ9;H3BJL6;H3BK43	S-formylglutathione hydrolase	Esd
NaN	NaN	NaN	NaN	24.6929	25.4483	26.2092	25.3688	+	8	8	8	10.4	10.4	10.4	109.08	0	20.163	561970000	12	Q8BWQ6;D3YW20;D3YW19;I1E4X5;Q8BWQ6-2;H3BJE8;Q8BWQ6-3;F6RR19	Q8BWQ6;D3YW20;D3YW19;I1E4X5;Q8BWQ6-2	UPF0505 protein C16orf62 homolog	9030624J02Rik
NaN	NaN	NaN	NaN	27.168	27.0521	26.5243	26.8364	+	8	8	8	29.6	29.6	29.6	41.779	0	20.16	1407800000	15	Q3TCD4;Q9WUR2-2;Q9WUR2;E9PYC6;E9Q858;E9PUY9;E9PYA9;E9PVM6;E9Q7A8;E9PY42;Q78JN3	Q3TCD4;Q9WUR2-2;Q9WUR2;E9PYC6;E9Q858;E9PUY9;E9PYA9;E9PVM6;E9Q7A8	Enoyl-CoA delta isomerase 2, mitochondrial	Eci2
NaN	NaN	NaN	NaN	26.8872	26.9033	26.9987	27.1669	+	6	6	6	15.9	15.9	15.9	51.572	0	19.875	1472800000	10	P30416;F7CAT1;F6S2D5	P30416	Peptidyl-prolyl cis-trans isomerase FKBP4;Peptidyl-prolyl cis-trans isomerase FKBP4, N-terminally processed	Fkbp4
NaN	NaN	NaN	NaN	25.7344	25.1124	25.4418	25.1978	+	4	4	4	23.7	23.7	23.7	23.357	0	19.857	537210000	6	G3UXX3;Q91XH5;Q64105;G3UZ79	G3UXX3;Q91XH5;Q64105;G3UZ79	Sepiapterin reductase	Spr
NaN	NaN	NaN	NaN	25.3703	24.3653	25.0727	25.0577	+	2	2	2	30	30	30	11.846	0	19.718	342390000	6	D6RFN5;D3YW25;O70131	D6RFN5;D3YW25;O70131	Ninjurin-1	Ninj1
NaN	NaN	NaN	NaN	26.0412	25.9779	25.9918	25.0051	+	7	7	7	25.8	25.8	25.8	53.255	0	19.534	729430000	9	Q00493	Q00493	Carboxypeptidase E	Cpe
NaN	NaN	NaN	NaN	26.5545	26.2109	26.1504	26.3884	+	5	5	5	38.2	38.2	38.2	16.292	0	19.48	946680000	11	Q80Y14;A0A1Y7VN70	Q80Y14;A0A1Y7VN70	Glutaredoxin-related protein 5, mitochondrial	Glrx5
NaN	NaN	NaN	NaN	26.943	26.6144	26.5372	26.6855	+	4	4	4	10.6	10.6	10.6	49.486	0	19.317	1500900000	14	A0A5F8MPS7;P24638;B7ZCF5;B7ZCF4	A0A5F8MPS7;P24638;B7ZCF5;B7ZCF4	Lysosomal acid phosphatase	Acp2
NaN	NaN	NaN	NaN	26.2114	25.7046	25.7421	25.817	+	3	3	3	67.1	67.1	67.1	8.1985	0	19.256	609150000	6	A0A1L1ST61;A0A1L1SV00;Q8R472;Q9JLR9;A0A1L1SR69	A0A1L1ST61;A0A1L1SV00;Q8R472;Q9JLR9;A0A1L1SR69	HIG1 domain family member 1A, mitochondrial	Higd1a
NaN	NaN	NaN	NaN	26.3398	24.9925	24.5497	NaN		4	4	4	18.8	18.8	18.8	39.94	0	19.058	412810000	3	Q791T5-2;Q791T5;A0A3Q4EG99;A0A3Q4EBT8;D3YXC2;A0A3Q4EC24;A0A3Q4EGL4;A0A3Q4EC97;A0A3Q4EIA3	Q791T5-2;Q791T5;A0A3Q4EG99;A0A3Q4EBT8;D3YXC2;A0A3Q4EC24;A0A3Q4EGL4	Mitochondrial carrier homolog 1	Mtch1
NaN	NaN	NaN	NaN	28.2632	27.5153	27.5326	27.4927	+	3	3	3	23.5	23.5	23.5	12.504	0	18.937	2485100000	13	P34884	P34884	Macrophage migration inhibitory factor	Mif
NaN	NaN	NaN	NaN	26.0316	26.6085	27.0975	26.3809	+	8	8	8	14.2	14.2	14.2	72.474	0	18.752	1112300000	10	E9QAD4;Q7TQK5	E9QAD4;Q7TQK5	Coiled-coil domain-containing protein 93	Ccdc93
NaN	NaN	NaN	NaN	26.1388	26.0348	26.1695	26.2416	+	3	3	3	26.4	26.4	26.4	32.2	0	18.683	745260000	7	Q7M759;A0A494BBA3	Q7M759	Alpha/beta hydrolase domain-containing protein 17B	Abhd17b
NaN	NaN	NaN	NaN	26.2961	25.8854	25.789	25.9149	+	6	6	6	28.7	28.7	28.7	36.353	0	18.495	713240000	10	Q3U3G8;Q9EPB5;F6TMN2	Q3U3G8;Q9EPB5	Serine hydrolase-like protein	Serhl
NaN	NaN	NaN	NaN	26.3876	26.2427	26.4516	26.0599	+	6	6	6	17.5	17.5	17.5	46.779	0	18.426	1065700000	12	A0A494B9H1;Q9EPK6;A0A494B9B2	A0A494B9H1;Q9EPK6;A0A494B9B2	Nucleotide exchange factor SIL1	Sil1
NaN	NaN	NaN	NaN	25.6452	25.509	25.4	25.2779	+	2	2	2	14.1	14.1	14.1	26.411	0	18.165	509340000	3	Q9Z2U1	Q9Z2U1	Proteasome subunit alpha type-5	Psma5
NaN	NaN	NaN	NaN	24.4389	24.4697	24.32	24.4725	+	3	3	3	1.4	1.4	1.4	317.22	0	18.149	227240000	2	Q04690-2;Q04690;A0A1W2P863;Q04690-4;Q04690-3	Q04690-2;Q04690;A0A1W2P863;Q04690-4;Q04690-3	Neurofibromin	Nf1
NaN	NaN	NaN	NaN	26.48	NaN	26.2912	25.9892		10	2	2	67.4	23.9	23.9	20.987	0	18.125	742100000	5	P62835;A0A0G2JDL9;A0A0G2JE52;A0A0G2JED9	P62835;A0A0G2JDL9;A0A0G2JE52;A0A0G2JED9	Ras-related protein Rap-1A	Rap1a
NaN	NaN	NaN	NaN	26.8565	26.4565	26.0358	26.3295	+	5	5	5	28.6	28.6	28.6	31.071	0	17.987	927020000	10	A0A494BAB5;Q9D5T0;A0A494B9Y0;A0A494B9L7	A0A494BAB5;Q9D5T0;A0A494B9Y0;A0A494B9L7	ATPase family AAA domain-containing protein 1	Atad1
NaN	NaN	NaN	NaN	26.4619	25.6892	26.2918	26.5876	+	2	2	2	18.8	18.8	18.8	29.167	0	17.825	780020000	6	F7D432;E9PWE0;E0CYV0;P23506;P23506-2;F6V9F1	F7D432;E9PWE0;E0CYV0;P23506;P23506-2;F6V9F1	Protein-L-isoaspartate O-methyltransferase;Protein-L-isoaspartate(D-aspartate) O-methyltransferase	Pcmt1
NaN	NaN	NaN	NaN	27.0496	27.2134	26.493	27.3445	+	6	6	6	62.9	62.9	62.9	13.36	0	17.79	1501300000	9	Q9CPP6;D3YTQ8	Q9CPP6	NADH dehydrogenase [ubiquinone] 1 alpha subcomplex subunit 5	Ndufa5
NaN	NaN	NaN	NaN	24.8998	25.1829	25.11	24.934	+	6	6	6	7	7	7	152.4	0	17.79	434790000	7	O89001	O89001	Carboxypeptidase D	Cpd
NaN	NaN	NaN	NaN	26.2327	25.3331	25.3554	24.9729	+	3	3	3	33.8	33.8	33.8	17.09	0	17.697	463990000	6	Q9CYL5;B1AWD6	Q9CYL5;B1AWD6	Golgi-associated plant pathogenesis-related protein 1	Glipr2
NaN	NaN	NaN	NaN	25.1893	25.2344	26.0527	25.5052	+	5	5	5	16.3	16.3	16.3	67.334	0	17.619	524370000	4	Q64FW2;H3BKK1;H3BJ51;F7CW61	Q64FW2;H3BKK1;H3BJ51	All-trans-retinol 13,14-reductase	Retsat
NaN	NaN	NaN	NaN	25.503	25.1806	25.6617	25.0371	+	3	3	3	11	11	11	41.839	0	17.487	456980000	6	A0A3B2WDB3;Q3UN02;B0V2Q9	A0A3B2WDB3;Q3UN02	Lysocardiolipin acyltransferase 1	Lclat1
NaN	NaN	NaN	NaN	26.1521	25.4139	26.2079	25.8585	+	7	7	7	19.3	19.3	19.3	44.12	0	17.376	655450000	10	Q99K70;B1AWT2;B1AWT3;Q7TT45;Q99K70-2;B1AWT4	Q99K70;B1AWT2;B1AWT3;Q7TT45	Ras-related GTP-binding protein C;Ras-related GTP-binding protein D	Rragc;Rragd
NaN	NaN	NaN	NaN	25.1066	24.9291	24.8347	25.4662	+	2	2	2	32.6	32.6	32.6	9.7331	0	17.308	342100000	7	A0A0N4SWI4;Q9CR98	A0A0N4SWI4;Q9CR98	Protein FAM136A	Fam136a
NaN	NaN	NaN	NaN	25.4082	24.6349	25.1141	NaN		2	2	2	4.1	4.1	4.1	115.02	0	17.291	320160000	5	O35607	O35607	Bone morphogenetic protein receptor type-2	Bmpr2
NaN	NaN	NaN	NaN	26.0634	25.4077	25.4478	26.1001	+	3	3	3	13.1	13.1	13.1	46.975	0	17.284	556300000	5	Q9ESW4;A0A0J9YU24;Q9ESW4-2	Q9ESW4;A0A0J9YU24;Q9ESW4-2	Acylglycerol kinase, mitochondrial	Agk
NaN	NaN	NaN	NaN	25.5639	26.8722	25.9991	25.2238	+	4	4	4	9.1	9.1	9.1	91.199	0	17.217	759670000	7	Q6PHU5;Q6PHU5-2	Q6PHU5;Q6PHU5-2	Sortilin	Sort1
NaN	NaN	NaN	NaN	26.6705	26.5916	27.0152	26.9939	+	7	7	7	18	18	18	40.538	0	17.196	1440300000	14	F8WJK8;Q99L47;E9Q1V0;E9Q1X9	F8WJK8;Q99L47;E9Q1V0	Hsc70-interacting protein	St13
NaN	NaN	NaN	NaN	25.0511	24.9101	25.8352	25.2952	+	4	4	4	23.5	23.5	23.5	32.928	0	17.079	502180000	4	P14901	P14901	Heme oxygenase 1	Hmox1
NaN	NaN	NaN	NaN	26.9195	26.8897	25.8215	26.5832	+	5	5	5	13.4	13.4	13.4	67.305	0	17.057	1027600000	10	A0A0A6YWU2;E9Q589;A0A0A6YY47;E9QB01;P13595-4;P13595-3;P13595-2;P13595;A0A0A6YY91	A0A0A6YWU2;E9Q589;A0A0A6YY47;E9QB01;P13595-4;P13595-3;P13595-2;P13595;A0A0A6YY91	Neural cell adhesion molecule 1	Ncam1
NaN	NaN	NaN	NaN	NaN	24.6392	24.934	24.7308		4	4	4	5.5	5.5	5.5	181.79	0	17.031	280290000	6	E0CZ22;D3Z624	E0CZ22		Mroh1
NaN	NaN	NaN	NaN	25.8417	25.9343	26.2563	25.812	+	4	4	4	14.8	14.8	14.8	47.499	0	16.981	909490000	7	Q7TQ95;A2ASL8;A2ASM0;A2ASM1	Q7TQ95;A2ASL8;A2ASM0	Protein lunapark	Lnp
NaN	NaN	NaN	NaN	24.2492	24.1829	26.0337	25.7394	+	3	3	3	7.7	7.7	7.7	48.968	0	16.973	454540000	5	P59325;Q8BVV6;A0A1Y7VLL6;A0A1Y7VKT5;A0A1Y7VLQ0;A0A1Y7VLK2;A0A1Y7VNP4;A0A1Y7VJG2	P59325;Q8BVV6	Eukaryotic translation initiation factor 5	Eif5
NaN	NaN	NaN	NaN	26.969	25.9362	26.6479	26.3241	+	5	5	5	61.5	61.5	61.5	15.137	0	16.958	945940000	7	Q05816	Q05816	Fatty acid-binding protein, epidermal	Fabp5
NaN	NaN	NaN	NaN	26.8553	25.9966	26.2112	26.3946	+	4	4	4	8.7	8.7	8.7	88.25	0	16.945	950300000	7	P97742;A0A494BAD3	P97742	Carnitine O-palmitoyltransferase 1, liver isoform	Cpt1a
NaN	NaN	NaN	NaN	26.7539	25.6577	25.8942	26.8531	+	5	5	5	9.6	9.6	9.6	59.704	0	16.748	1068700000	6	A0A0R4J138;P50429;P50429-2	A0A0R4J138;P50429	Arylsulfatase B	Arsb
NaN	NaN	NaN	NaN	24.7958	26.3334	25.7552	NaN		4	4	3	8.9	8.9	7.4	63.961	0	16.736	783300000	7	Q8BYK6;Q8BYK6-2;Q8BYK6-3;A2AWN8;P59326	Q8BYK6;Q8BYK6-2;Q8BYK6-3	YTH domain-containing family protein 3	Ythdf3
NaN	NaN	NaN	NaN	25.42	25.1359	24.944	25.103	+	6	6	6	16.7	16.7	16.7	45.075	0	16.717	463450000	9	D3YTT4;A0A0R4J0P1;Q9D7B6	D3YTT4;A0A0R4J0P1;Q9D7B6	Isobutyryl-CoA dehydrogenase, mitochondrial	Acad8
NaN	NaN	NaN	NaN	26.5705	26.7223	26.404	26.8152	+	9	9	9	14.8	14.8	14.8	120.79	0	16.651	1272900000	10	Q3V117;Q91V92;Q3TS02	Q3V117;Q91V92	ATP-citrate synthase	Acly
NaN	NaN	NaN	NaN	26.4361	27.0377	26.3129	26.4832	+	3	3	3	36.7	36.7	36.7	12.454	0	16.589	955890000	4	P63030;D3YWY6;D3Z5S0;E9Q0V4;D3Z786	P63030;D3YWY6;D3Z5S0;E9Q0V4	Mitochondrial pyruvate carrier 1	Mpc1
NaN	NaN	NaN	NaN	NaN	26.3567	26.2088	25.4806		5	5	5	16.6	16.6	16.6	52.22	0	16.488	804400000	8	P60229	P60229	Eukaryotic translation initiation factor 3 subunit E	Eif3e
NaN	NaN	NaN	NaN	24.968	25.0284	25.1509	NaN		3	3	3	5.6	5.6	5.6	114.24	0	16.21	328470000	5	A0A6I8MWZ0;Q6P9Q6;Q6P9Q6-2;Q80YW9	A0A6I8MWZ0;Q6P9Q6;Q6P9Q6-2;Q80YW9	FK506-binding protein 15;Peptidyl-prolyl cis-trans isomerase	Fkbp15
NaN	NaN	NaN	NaN	NaN	25.5245	25.7349	25.6179		2	2	2	12.8	12.8	12.8	23.143	0	16.2	514570000	5	E9Q0T0;G5E8W7;O35448;F6SPQ1	E9Q0T0;G5E8W7;O35448;F6SPQ1	Lysosomal thioesterase PPT2	Ppt2
NaN	NaN	NaN	NaN	26.8801	26.0796	25.6848	26.4202	+	5	5	5	43.4	43.4	43.4	16.736	0	16.195	1076700000	7	Q9D6J6-2;Q9D6J6;M0QWP9	Q9D6J6-2;Q9D6J6;M0QWP9	NADH dehydrogenase [ubiquinone] flavoprotein 2, mitochondrial	Ndufv2
NaN	NaN	NaN	NaN	26.2289	26.121	26.1736	26.1297	+	2	2	2	18.5	18.5	18.5	14.982	0	16.165	837000000	6	D3Z7C6;Q9R0Q7	D3Z7C6;Q9R0Q7	Prostaglandin E synthase 3	Ptges3
NaN	NaN	NaN	NaN	26.0587	26.0697	25.439	26.3447	+	7	5	5	17.1	13.1	13.1	58.47	0	16.098	681640000	7	Q9CWK8	Q9CWK8	Sorting nexin-2	Snx2
NaN	NaN	NaN	NaN	27.7562	26.6143	27.0909	27.2104	+	8	8	8	60.3	60.3	60.3	12.345	0	16.095	1498200000	9	O55042-2;O55042;Q91ZZ3	O55042-2;O55042	Alpha-synuclein	Snca
NaN	NaN	NaN	NaN	26.7188	26.6227	26.2346	26.4031	+	4	4	4	16.3	16.3	16.3	30.972	0	16.053	1502100000	9	Q8K4Z3	Q8K4Z3	NAD(P)H-hydrate epimerase	Apoa1bp
NaN	NaN	NaN	NaN	25.9896	25.9602	26.3477	25.7993	+	5	5	5	21	21	21	35.54	0	16.03	812600000	9	A0A0R4J058;A0A0R4J242;Q922Q9-2;Q922Q9;A0A1B0GSH5;D3YWG2;G8JL55	A0A0R4J058;A0A0R4J242;Q922Q9-2;Q922Q9;A0A1B0GSH5;D3YWG2;G8JL55	Chitinase domain-containing protein 1	Chid1
NaN	NaN	NaN	NaN	23.717	24.0308	23.7761	NaN		2	2	2	10.9	10.9	10.9	29.315	0	16.02	129450000	3	F7CJY7;F6X4N5;Q8BVI5;B7ZCB8	F7CJY7;F6X4N5;Q8BVI5;B7ZCB8	Syntaxin-16	Stx16
NaN	NaN	NaN	NaN	24.4618	26.0784	25.8337	NaN		8	8	6	17.6	17.6	14.7	65.583	0	15.745	788380000	8	Q5SF07;A6X8Z3;Q5SF07-2	Q5SF07;A6X8Z3;Q5SF07-2	Insulin-like growth factor 2 mRNA-binding protein 2	Igf2bp2
NaN	NaN	NaN	NaN	25.9615	26.4813	26.7675	26.1284	+	6	6	6	12.4	12.4	12.4	85.965	0	15.735	914940000	10	O55106;F8WH41;F6Z700	O55106;F8WH41	Striatin	Strn
NaN	NaN	NaN	NaN	25.4123	25.3306	25.2705	25.0399	+	4	4	4	21.4	21.4	21.4	29.645	0	15.676	422870000	5	Q99LD8;O08972;G3UZR0	Q99LD8;O08972;G3UZR0	N(G),N(G)-dimethylarginine dimethylaminohydrolase 2	Ddah2
NaN	NaN	NaN	NaN	26.2207	26.5543	26.0097	26.6153	+	8	8	8	30.5	30.5	30.5	50.41	0	15.667	853470000	10	Q5FWK3;A2AH25	Q5FWK3;A2AH25	Rho GTPase-activating protein 1	Arhgap1
NaN	NaN	NaN	NaN	26.6531	26.5534	27.04	26.6206	+	8	8	8	8.9	8.9	8.9	117.3	0	15.53	1214700000	10	Q8C129	Q8C129	Leucyl-cystinyl aminopeptidase	Lnpep
NaN	NaN	NaN	NaN	25.0317	26.3088	26.7331	26.5145	+	6	6	6	23.9	23.9	23.9	38.092	0	15.422	964080000	11	Q99L45;E0CXJ3	Q99L45	Eukaryotic translation initiation factor 2 subunit 2	Eif2s2
NaN	NaN	NaN	NaN	26.8703	26.2474	26.2407	25.9139	+	6	6	6	29	29	29	28.093	0	15.402	838280000	9	Q8BQ47;D3Z0T5	Q8BQ47;D3Z0T5	Protein canopy homolog 4	Cnpy4
NaN	NaN	NaN	NaN	25.6176	25.2327	25.377	25.2826	+	1	1	1	12.1	12.1	12.1	16.815	0	15.204	433310000	5	Q78XF5	Q78XF5	Oligosaccharyltransferase complex subunit OSTC	Ostc
NaN	NaN	NaN	NaN	25.8555	25.6538	25.9105	26.2129	+	8	8	8	6.1	6.1	6.1	175.19	0	15.19	649960000	14	B9EJA2-5;B9EJA2-4;B9EJA2;B9EJA2-2;B9EJA2-3;D3Z551;D3Z1E3;F6Q1W8	B9EJA2-5;B9EJA2-4;B9EJA2;B9EJA2-2;B9EJA2-3;D3Z551;D3Z1E3	Cortactin-binding protein 2	Cttnbp2
NaN	NaN	NaN	NaN	27.4079	26.7415	26.1551	26.373	+	4	4	4	28	28	28	27.738	0	15.126	1091300000	7	Q9DCM0	Q9DCM0	Persulfide dioxygenase ETHE1, mitochondrial	Ethe1
NaN	NaN	NaN	NaN	25.7832	25.394	25.5058	25.8193	+	5	5	4	6.8	6.8	5.3	105.33	0	15.12	559130000	9	Q8BYC6;A0A0R4J1T3;Q3V3K3	Q8BYC6;A0A0R4J1T3;Q3V3K3	Serine/threonine-protein kinase TAO3	Taok3
NaN	NaN	NaN	NaN	NaN	26.4169	26.3006	26.2528		6	6	6	16.4	16.4	16.4	64.403	0	15.102	711470000	8	Q8BJW6;Q8BJW6-2;D3YZZ6;D6RFN2;D6RGA6	Q8BJW6;Q8BJW6-2	Eukaryotic translation initiation factor 2A;Eukaryotic translation initiation factor 2A, N-terminally processed	Eif2a
NaN	NaN	NaN	NaN	27.0645	27.0336	26.8628	26.748	+	5	5	5	39.8	39.8	39.8	10.477	0	15.07	1278700000	7	Q91VW3;I7HPY0	Q91VW3	SH3 domain-binding glutamic acid-rich-like protein 3	Sh3bgrl3
NaN	NaN	NaN	NaN	NaN	26.4448	26.9318	25.8927		2	2	2	22.2	22.2	22.2	17.27	0	15.013	880220000	3	Q9CQH7	Q9CQH7	Transcription factor BTF3 homolog 4	Btf3l4
NaN	NaN	NaN	NaN	24.7824	25.0627	24.6574	NaN		3	3	3	3.9	3.9	3.9	140.72	0	14.95	266350000	3	E9Q8N5;Q08EB6;Q08EB5;F7DCH5;Q8BRT1;A0A1L1ST22;A0A0A6YXZ1;E9Q6L0;J3QP81;A0A087WS18;A0A087WQF1;A0A087WQ95;A0A087WNW8;A0A087WRK0;A0A087WP42;E9QNY9;A0A087WRE8;E9QKH0;A0A087WQ31;Q8BRT1-5;Q80TV8-2;Q80TV8	E9Q8N5;Q08EB6;Q08EB5;F7DCH5;Q8BRT1	CLIP-associating protein 2	Clasp2
NaN	NaN	NaN	NaN	26.2115	25.7441	25.4658	25.7069	+	5	5	5	14.9	14.9	14.9	55.887	0	14.822	692430000	9	Q3U367;Q9JLJ2	Q3U367;Q9JLJ2	4-trimethylaminobutyraldehyde dehydrogenase	Aldh9a1
NaN	NaN	NaN	NaN	25.8679	26.0288	25.3426	25.1685	+	4	4	4	12.7	12.7	12.7	53.398	0	14.739	542620000	5	Q8VCF0	Q8VCF0	Mitochondrial antiviral-signaling protein	Mavs
NaN	NaN	NaN	NaN	26.3075	26.1175	25.997	25.83	+	5	5	5	17.8	17.8	17.8	54.201	0	14.736	743530000	6	Q61578	Q61578	NADPH:adrenodoxin oxidoreductase, mitochondrial	Fdxr
NaN	NaN	NaN	NaN	25.7458	25.4846	26.3218	25.7765	+	5	5	5	26	26	26	40.862	0	14.355	626980000	9	E9Q421;Q8BXX3;Q8BL63;Q9CXY9;A0A0G2JEZ9	E9Q421;Q8BXX3;Q8BL63;Q9CXY9	GPI-anchor transamidase	Pigk
NaN	NaN	NaN	NaN	26.3914	25.7977	25.3625	25.9719	+	5	5	5	19	19	19	49.57	0	14.268	674580000	5	A0A0A0MQ68;Q60759;D3Z4I2	A0A0A0MQ68;Q60759	Glutaryl-CoA dehydrogenase, mitochondrial	Gcdh
NaN	NaN	NaN	NaN	24.538	25.9569	25.7404	25.6091	+	5	5	5	31.8	31.8	31.8	16.369	0	14.219	821170000	11	Q9JMG1	Q9JMG1	Endothelial differentiation-related factor 1	Edf1
NaN	NaN	NaN	NaN	27.2867	27.1497	27.0231	26.9517	+	3	3	3	61.1	61.1	61.1	13.777	0	14.148	1457700000	5	P70349;B0R1E3	P70349	Histidine triad nucleotide-binding protein 1	Hint1
NaN	NaN	NaN	NaN	24.3019	24.4569	25.3136	24.4936	+	4	4	4	6.5	6.5	6.5	98.144	0	13.871	303550000	6	P15920;A0A0G2JFS2	P15920;A0A0G2JFS2	V-type proton ATPase 116 kDa subunit a isoform 2	Atp6v0a2
NaN	NaN	NaN	NaN	25.1294	26.1942	25.4351	25.9823	+	5	5	5	13.9	13.9	13.9	46.797	0	13.849	600910000	10	Q9D8U8	Q9D8U8	Sorting nexin-5	Snx5
NaN	NaN	NaN	NaN	25.7989	26.2641	25.666	NaN		9	4	4	46.2	26.6	26.6	21.669	0	13.666	776270000	4	D3YX76;P15626	D3YX76;P15626	Glutathione S-transferase Mu 2	Gstm2
NaN	NaN	NaN	NaN	25.8442	25.8204	25.752	26.157	+	6	6	6	12.4	12.4	12.4	53.987	0	13.432	737870000	8	A0A571BEI2;Q6PIU9	A0A571BEI2;Q6PIU9	Uncharacterized protein FLJ45252 homolog
NaN	NaN	NaN	NaN	24.9486	25.7266	25.1178	25.5267	+	5	5	5	8.9	8.9	8.9	86.436	0	13.376	431280000	5	Q9D662;A2ANA0;A2AN98;A2AN99;A2AN97	Q9D662;A2ANA0	Protein transport protein Sec23B	Sec23b
NaN	NaN	NaN	NaN	24.3608	24.2705	24.0627	NaN		2	2	2	8.3	8.3	8.3	48.34	0	13.329	167390000	3	Q921S7	Q921S7	39S ribosomal protein L37, mitochondrial	Mrpl37
NaN	NaN	NaN	NaN	25.5826	25.7351	25.053	25.6832	+	4	4	3	34.3	34.3	25.5	11.729	0	13.316	783300000	11	D3Z1Z8;D3Z5N2;P54227	D3Z1Z8;D3Z5N2;P54227	Stathmin	Stmn1
NaN	NaN	NaN	NaN	NaN	24.9106	24.5194	24.515		3	3	3	23.4	23.4	23.4	17.936	0	13.221	226460000	4	Q9D289;A0A1W2P6E6;A0A1W2P7S5;A0A1W2P836;A0A1W2P7N0	Q9D289;A0A1W2P6E6;A0A1W2P7S5	Trafficking protein particle complex subunit 6B	Trappc6b
NaN	NaN	NaN	NaN	NaN	25.8086	26.4252	25.183		4	4	4	29.4	29.4	29.4	25.086	0	13.015	588370000	7	Q9DBZ5;A0A140LJ59;Q3TY56;Q9DBZ5-2	Q9DBZ5;A0A140LJ59;Q3TY56;Q9DBZ5-2	Eukaryotic translation initiation factor 3 subunit K	Eif3k
NaN	NaN	NaN	NaN	26.3099	25.7466	26.1205	26.3313	+	7	7	7	16.3	16.3	16.3	39.666	0	12.954	705400000	10	P70460	P70460	Vasodilator-stimulated phosphoprotein	Vasp
NaN	NaN	NaN	NaN	26.1561	25.7583	26.1192	25.7909	+	5	5	5	8	8	8	107.79	0	12.938	731280000	7	Q91XL9;D3Z754;A0A3Q4EG54;A0A3Q4EI24;Q3V156;Q91XL9-3;Q91XL9-2;D3Z7I9;A0A3Q4L2S6;Q8K2D2;D3YZ66	Q91XL9;D3Z754;A0A3Q4EG54;A0A3Q4EI24;Q3V156;Q91XL9-3;Q91XL9-2	Oxysterol-binding protein-related protein 1;Oxysterol-binding protein	Osbpl1a
NaN	NaN	NaN	NaN	25.3429	25.5218	25.0129	25.668	+	3	3	3	42.2	42.2	42.2	9.2864	0	12.91	439990000	8	P62077	P62077	Mitochondrial import inner membrane translocase subunit Tim8 B	Timm8b
NaN	NaN	NaN	NaN	26.574	26.0729	26.324	26.038	+	3	3	3	60.5	60.5	60.5	11.642	0	12.842	818440000	9	Q9CQN6	Q9CQN6	Transmembrane protein 14C	Tmem14c
NaN	NaN	NaN	NaN	25.3296	25.707	26.3357	26.6642	+	3	3	3	20	20	20	24.196	0	12.574	728110000	9	A0A087WNP6;Q4VAA2-2;Q4VAA2;A0A087WRM0;F8WGL9;A0A087WS49	A0A087WNP6;Q4VAA2-2;Q4VAA2;A0A087WRM0	Protein CDV3	Cdv3
NaN	NaN	NaN	NaN	25.7423	25.3966	25.6065	25.5069	+	4	4	4	8.6	8.6	8.6	65.629	0	12.409	719410000	7	Q8BQ30;Q8BQ30-2;A0A087WRI9	Q8BQ30;Q8BQ30-2;A0A087WRI9	Phostensin	Ppp1r18
NaN	NaN	NaN	NaN	25.6676	25.0635	25.3089	24.8076	+	3	3	3	24.6	24.6	24.6	34.134	0	12.405	405810000	5	Q9DB73;G3UZG6	Q9DB73	NADH-cytochrome b5 reductase 1	Cyb5r1
NaN	NaN	NaN	NaN	25.1232	24.8452	25.1653	NaN		6	6	6	7.3	7.3	7.3	144.77	0	12.398	476700000	8	E9Q175;E9Q3L1;E9PVU0;E9Q174;V9GXM4;V9GX76;Q64331	E9Q175;E9Q3L1;E9PVU0;E9Q174;V9GXM4;V9GX76;Q64331	Unconventional myosin-VI	Myo6
NaN	NaN	NaN	NaN	26.8142	26.0482	26.137	26.4321	+	6	6	6	15.9	15.9	15.9	52.27	0	12.395	840010000	10	A0A2C9F2D2;Q07076;A0A286YCW4	A0A2C9F2D2;Q07076	Annexin A7	Anxa7
NaN	NaN	NaN	NaN	24.9509	25.0358	25.2584	24.8498	+	4	4	4	36.2	36.2	36.2	21.86	0	12.387	382830000	5	Q9CQ02;A0A1L1SRX4;A0A1L1SVC7;A0A1L1SRM6;A0A1L1ST08;A0A1L1SRJ9	Q9CQ02;A0A1L1SRX4;A0A1L1SVC7;A0A1L1SRM6;A0A1L1ST08;A0A1L1SRJ9	COMM domain-containing protein 4	Commd4
NaN	NaN	NaN	NaN	25.2991	26.6328	26.201	24.8606	+	4	4	4	21.5	21.5	21.5	32.88	0	12.376	670780000	4	Q9EQ06;Q9EQ06-2;A8Y5N4;Q8VCR2-2;Q8VCR2	Q9EQ06;Q9EQ06-2	Estradiol 17-beta-dehydrogenase 11	Hsd17b11
NaN	NaN	NaN	NaN	24.6775	24.9266	25.3892	24.8353	+	3	3	3	18.8	18.8	18.8	26.172	0	12.374	441960000	3	Q9CXE7;D3Z615;Q8C5H9;Q3V440;E9Q2J2;E9PXY3	Q9CXE7	Transmembrane emp24 domain-containing protein 5	Tmed5
NaN	NaN	NaN	NaN	25.5446	25.53	26.0985	25.2967	+	7	7	7	14.8	14.8	14.8	57.147	0	12.33	683720000	10	Q922B2	Q922B2	Aspartate--tRNA ligase, cytoplasmic	Dars
NaN	NaN	NaN	NaN	26.2754	26.0401	26.3336	26.3758	+	11	5	3	69.4	23.5	15.8	20.586	0	12.275	807550000	8	A0A0G2JGP4;Q9D091;P08556;A0A0G2JE25;A0A0G2JGM2;B2KGV5;E9Q8V2;E9PVD5;A0A0N4SVY1	A0A0G2JGP4;Q9D091;P08556;A0A0G2JE25	GTPase NRas	Nras
NaN	NaN	NaN	NaN	25.8268	25.3807	25.6951	25.7529	+	4	4	4	7.7	7.7	7.7	56.585	0	12.114	547670000	9	Q61753;F6ZSB7	Q61753	D-3-phosphoglycerate dehydrogenase	Phgdh
NaN	NaN	NaN	NaN	26.1855	25.0064	25.7027	25.4729	+	6	6	6	10	10	10	86.9	0	12.089	581760000	10	E9Q718;Q9R0B9	E9Q718;Q9R0B9	Procollagen-lysine,2-oxoglutarate 5-dioxygenase 2	Plod2
NaN	NaN	NaN	NaN	25.3447	24.9205	25.409	NaN		5	3	3	11.2	7.7	7.7	70.148	0	11.968	350290000	5	Q61233	Q61233	Plastin-2	Lcp1
NaN	NaN	NaN	NaN	25.6532	25.7517	25.6064	NaN		4	4	4	19.9	19.9	19.9	38.249	0	11.898	473930000	5	Q64442	Q64442	Sorbitol dehydrogenase	Sord
NaN	NaN	NaN	NaN	25.3801	25.7508	25.6547	25.3947	+	6	6	6	21.7	21.7	21.7	47.115	0	11.819	552530000	6	Q3U0I9;Q8CFD4;A0A0G2JEQ9;A0A0G2JDT3;A0A0G2JDJ6	Q3U0I9;Q8CFD4;A0A0G2JEQ9	Sorting nexin-8	Snx8
NaN	NaN	NaN	NaN	26.0751	25.7431	25.7024	25.4702	+	5	5	5	34.4	34.4	34.4	18.783	0	11.477	588570000	8	A0A338P7E3;A0A338P711;C0HKG6;C0HKG5	A0A338P7E3;A0A338P711;C0HKG6;C0HKG5
NaN	NaN	NaN	NaN	26.7959	27.202	27.3063	27.3371	+	6	6	6	27.5	27.5	27.5	34.165	0	11.47	1610000000	7	P70452;D6RJ29	P70452	Syntaxin-4	Stx4
NaN	NaN	NaN	NaN	24.9927	25.0641	24.9771	NaN		5	5	5	3.8	3.8	3.8	237.32	0	11.459	334530000	5	F8VQB6;D3YXU7;E9Q5G1;F8VQB6-2;F6UVU0	F8VQB6;D3YXU7	Unconventional myosin-X	Myo10
NaN	NaN	NaN	NaN	24.7112	NaN	24.1318	24.2216		3	3	3	14.4	14.4	14.4	31.375	0	11.438	280950000	7	P54116	P54116	Erythrocyte band 7 integral membrane protein	Stom
NaN	NaN	NaN	NaN	25.0568	25.0958	25.4096	25.4671	+	5	5	5	12.5	12.5	12.5	57.681	0	11.358	510600000	7	B1AZ46;Q8BKX1-4;Q8BKX1-3;Q8BKX1-2;Q8BKX1	B1AZ46;Q8BKX1-4;Q8BKX1-3;Q8BKX1-2;Q8BKX1	Brain-specific angiogenesis inhibitor 1-associated protein 2	Baiap2
NaN	NaN	NaN	NaN	25.9809	26.0329	26.3537	25.7543	+	3	3	3	17.4	17.4	17.4	23.578	0	11.28	730350000	7	Q8BR63	Q8BR63	Protein FAM177A1	Fam177a1
NaN	NaN	NaN	NaN	26.1623	NaN	26.378	25.8426		3	3	3	9.7	9.7	9.7	63.229	0	11.128	779750000	5	A0A0R4J0K4;Q9CRG1	A0A0R4J0K4;Q9CRG1	Transmembrane 7 superfamily member 3	Tm7sf3
NaN	NaN	NaN	NaN	NaN	24.1538	24.4541	23.7738		3	3	3	9.3	9.3	9.3	53.746	0	11.121	163920000	5	A2A5R8;Q9DBE7;A2A5S3;V9GX87;Q9Z108	A2A5R8;Q9DBE7;A2A5S3;V9GX87;Q9Z108	Double-stranded RNA-binding protein Staufen homolog 1	Stau1
NaN	NaN	NaN	NaN	25.2906	25.4917	24.9796	25.4157	+	3	3	1	30	30	11.1	28.003	0	11.115	426530000	5	E0CYI3;E0CYB9;Q6PCP5-4;Q6PCP5-3;Q6PCP5;F7CTF8	E0CYI3;E0CYB9;Q6PCP5-4;Q6PCP5-3;Q6PCP5;F7CTF8	Mitochondrial fission factor	Mff
NaN	NaN	NaN	NaN	26.3244	26.0397	25.8775	26.6385	+	5	5	5	22.4	22.4	22.4	33.542	0	11.106	802170000	8	A0A1W2P701;Q6P8X1	A0A1W2P701;Q6P8X1	Sorting nexin-6;Sorting nexin-6, N-terminally processed	Snx6
NaN	NaN	NaN	NaN	25.3904	25.3355	24.9049	25.5565	+	5	5	5	10.6	10.6	10.6	80.027	0	10.992	524370000	7	O88967	O88967	ATP-dependent zinc metalloprotease YME1L1	Yme1l1
NaN	NaN	NaN	NaN	26.2723	25.2271	25.7667	NaN		4	4	1	15.5	15.5	4	37.022	0	10.97	554400000	5	A0A087WSF5;G5E8E1;A0A087WNU6;E9Q9T1;A0A087WPK3;Q3UZ39-2;A0A0G2JGZ1;A0A0G2JDR6;A0A1L1SVG1;A0A0R4J169;A0A1L1SQW1;E9QN52;A0A0G2JEP4;A0A0G2JFV5;A0A1L1SSC0;A0A668KLE1;Q91WK0-2;Q91WK0	A0A087WSF5;G5E8E1;A0A087WNU6;E9Q9T1;A0A087WPK3;Q3UZ39-2	Leucine-rich repeat flightless-interacting protein 1	Lrrfip1
NaN	NaN	NaN	NaN	26.3985	25.9537	25.481	26.0936	+	7	7	7	5.5	5.5	5.5	265.25	0	10.871	647670000	7	Q5SWU9;Q5SWU9-2;V9GWS0;V9GWR9;V9GWS1;A0A0R4J1S9	Q5SWU9;Q5SWU9-2	Acetyl-CoA carboxylase 1;Biotin carboxylase	Acaca
NaN	NaN	NaN	NaN	24.3251	NaN	24.6534	24.3281		5	5	5	12.7	12.7	12.7	52.75	0	10.814	250000000	6	Q9CPY7-2;Q9CPY7;A0A0G2JEM7	Q9CPY7-2;Q9CPY7	Cytosol aminopeptidase	Lap3
NaN	NaN	NaN	NaN	26.4951	27.0889	25.8822	26.2761	+	3	3	3	17.5	17.5	17.5	40.801	0	10.758	1005100000	8	O88507	O88507	Ciliary neurotrophic factor receptor subunit alpha	Cntfr
NaN	NaN	NaN	NaN	25.7697	25.5221	25.6425	25.609	+	5	5	5	16.5	16.5	16.5	46.584	0	10.704	574830000	9	P16460	P16460	Argininosuccinate synthase	Ass1
NaN	NaN	NaN	NaN	25.3331	NaN	24.9042	25.1354		3	3	3	8.9	8.9	8.9	81.635	0	10.703	282350000	5	Q8BGS1;Q8BGS1-3;Q8BGS1-2	Q8BGS1;Q8BGS1-3	Band 4.1-like protein 5	Epb41l5
NaN	NaN	NaN	NaN	NaN	25.6283	25.6309	25.3649		4	4	4	3.7	3.7	3.7	219.46	0	10.692	504590000	5	G3UX48;Q7TSC1	G3UX48;Q7TSC1	Protein PRRC2A	Prrc2a
NaN	NaN	NaN	NaN	24.551	25.1607	25.6295	24.898	+	4	4	4	17.4	17.4	17.4	37.965	0	10.646	512550000	6	D3Z3S1;Q9WUQ2;F6XLZ3;A0A0J9YU39	D3Z3S1;Q9WUQ2;F6XLZ3	Prolactin regulatory element-binding protein	Preb
NaN	NaN	NaN	NaN	NaN	24.6723	23.4085	23.9425		2	2	2	2	2	2	203.91	0	10.602	143220000	2	Q6PDI5-2;Q6PDI5;A2ALW1;A2ALV8;A2ALV6;A2ALV7	Q6PDI5-2;Q6PDI5;A2ALW1;A2ALV8;A2ALV6;A2ALV7	Proteasome-associated protein ECM29 homolog	Ecm29;AI314180
NaN	NaN	NaN	NaN	25.5266	25.4161	26.117	25.1918	+	3	3	3	17.9	17.9	17.9	39.124	0	10.597	526000000	4	Q8C0E2;Q8C0E2-2	Q8C0E2	Vacuolar protein sorting-associated protein 26B	Vps26b
NaN	NaN	NaN	NaN	26.3071	27.4901	26.2559	26.0776	+	5	5	5	82.4	82.4	82.4	7.3184	0	10.581	1135600000	6	Q80SZ7;D3Z7Q3;A0A3B2WD42	Q80SZ7	Guanine nucleotide-binding protein G(I)/G(S)/G(O) subunit gamma-5	Gng5
NaN	NaN	NaN	NaN	25.7891	26.1504	24.738	25.0903	+	4	4	4	16.2	16.2	16.2	61.9	0	10.473	520350000	8	E9Q4G8;E9Q3Q6;Q61490;Q5MPX5;F6QH25	E9Q4G8;E9Q3Q6;Q61490;Q5MPX5	CD166 antigen	Alcam
NaN	NaN	NaN	NaN	NaN	25.2646	25.2258	24.9952		4	4	3	6.8	6.8	4.4	85.359	0	10.353	334540000	5	P12382;P47857;P47857-2;P47857-3	P12382	ATP-dependent 6-phosphofructokinase, liver type	Pfkl
NaN	NaN	NaN	NaN	24.9237	25.2217	25.9205	25.0066	+	4	4	4	4.9	4.9	4.9	135.55	0	10.348	477600000	5	Q80ZX0;F6VJC5	Q80ZX0;F6VJC5		Sec24b
NaN	NaN	NaN	NaN	25.3553	24.6252	25.1294	NaN		4	4	4	7.4	7.4	7.4	75.359	0	10.324	328450000	6	Q3TAW3;E9Q296;Q8C178;Q9EPL9;D3Z2N6;A0A0J9YVH1	Q3TAW3;E9Q296;Q8C178;Q9EPL9;D3Z2N6	Acyl-coenzyme A oxidase;Peroxisomal acyl-coenzyme A oxidase 3	Acox3
NaN	NaN	NaN	NaN	27.0036	26.9358	26.4728	25.63	+	5	5	1	23.5	23.5	5.9	22.099	0	10.267	1172000000	7	P43277;P15864	P43277;P15864	Histone H1.3;Histone H1.2	Hist1h1d;Hist1h1c
NaN	NaN	NaN	NaN	25.1259	25.0095	25.2584	25.3394	+	3	3	3	3.7	3.7	3.7	85.964	0	10.23	436130000	7	Q9WTR1	Q9WTR1	Transient receptor potential cation channel subfamily V member 2	Trpv2
NaN	NaN	NaN	NaN	25.2211	25.7671	26.3038	25.9987	+	3	3	3	23.1	23.1	23.1	22.037	0	10.028	849690000	8	Q63829	Q63829	COMM domain-containing protein 3	Commd3
NaN	NaN	NaN	NaN	NaN	25.0332	25.667	25.0288		3	3	3	46.9	46.9	46.9	12.821	0	9.963	335980000	3	B1AT10;Q920Q6-3;Q920Q6-2;Q920Q6;B1AT13	B1AT10;Q920Q6-3;Q920Q6-2;Q920Q6;B1AT13	RNA-binding protein Musashi homolog 2	Msi2
NaN	NaN	NaN	NaN	24.8715	24.9513	25.3298	NaN		3	3	3	7.1	7.1	7.1	67.839	0	9.8738	322590000	2	Q99MN1;Q8R2P8	Q99MN1;Q8R2P8	Lysine--tRNA ligase	Kars
NaN	NaN	NaN	NaN	25.6866	25.5264	24.9445	24.8956	+	4	4	4	9.8	9.8	9.8	67.335	0	9.8307	401540000	5	Q6P8N8;Q9JHS4;F7BB92	Q6P8N8;Q9JHS4;F7BB92	ATP-dependent Clp protease ATP-binding subunit clpX-like, mitochondrial	Clpx
NaN	NaN	NaN	NaN	NaN	25.8893	26.4499	26.0051		5	5	5	24.4	24.4	24.4	35.638	0	9.8193	652820000	5	Q9Z1D1	Q9Z1D1	Eukaryotic translation initiation factor 3 subunit G	Eif3g
NaN	NaN	NaN	NaN	25.2013	25.1415	25.4934	25.3074	+	4	4	4	14.5	14.5	14.5	51.658	0	9.7395	424050000	4	Q8VDD8	Q8VDD8	WAS protein family homolog 1	Wash1
NaN	NaN	NaN	NaN	24.823	24.1189	24.9579	NaN		2	2	2	5	5	5	51.144	0	9.6595	355860000	5	Q3UGN9;P70297;A0A0A6YVP6;B0R0N7;A2ARJ0;O88811	Q3UGN9;P70297;A0A0A6YVP6;B0R0N7;A2ARJ0;O88811	Signal transducing adapter molecule 1;Signal transducing adapter molecule 2	Stam;Stam2
NaN	NaN	NaN	NaN	26.277	25.5293	25.5018	26.0948	+	3	3	3	19.2	19.2	19.2	26.8	0	9.635	729090000	5	Q8C845;Q9D8Y0	Q8C845;Q9D8Y0	EF-hand domain-containing protein D2	Efhd2
NaN	NaN	NaN	NaN	25.4141	25.8971	25.8843	25.2602	+	4	4	4	18.7	18.7	18.7	45.133	0	9.5794	613250000	6	Q60737	Q60737	Casein kinase II subunit alpha	Csnk2a1
NaN	NaN	NaN	NaN	26.0189	26.1104	25.9585	26.275	+	5	5	5	44.2	44.2	44.2	12.575	0	9.3751	869780000	9	Q9Z1P6	Q9Z1P6	NADH dehydrogenase [ubiquinone] 1 alpha subcomplex subunit 7	Ndufa7
NaN	NaN	NaN	NaN	25.5231	25.1193	25.0339	24.8455	+	3	3	3	7.9	7.9	7.9	61.389	0	9.3369	381380000	6	D3Z7X0;Q8K370;D3Z2B3	D3Z7X0;Q8K370	Acyl-CoA dehydrogenase family member 10	Acad12;Acad10
NaN	NaN	NaN	NaN	24.4342	25.3942	24.6531	24.7445	+	3	3	3	8.4	8.4	8.4	44.123	0	9.2116	381790000	2	Q61187;A0A1B0GRX2;A0A1B0GS10;D3Z2V5;A0A1B0GS09	Q61187;A0A1B0GRX2;A0A1B0GS10	Tumor susceptibility gene 101 protein	Tsg101
NaN	NaN	NaN	NaN	NaN	24.9404	24.7154	24.6293		4	4	4	2	2	2	405.82	0	9.1924	263680000	6	Q8BX70-2;Q8BX70-3;Q8BX70;A0A1L1SSJ3;A0A1L1SS63;A0A1L1SUY8	Q8BX70-2;Q8BX70-3;Q8BX70	Vacuolar protein sorting-associated protein 13C	Vps13c
NaN	NaN	NaN	NaN	25.4675	26.1198	25.2613	NaN		3	3	3	7.1	7.1	7.1	79.343	0	9.1425	604840000	7	Q99MR8;A0A0G2JF64;A0A0G2JFQ5	Q99MR8;A0A0G2JF64	Methylcrotonoyl-CoA carboxylase subunit alpha, mitochondrial	Mccc1
NaN	NaN	NaN	NaN	25.8372	24.5214	24.7608	25.0818	+	3	3	3	22.5	22.5	22.5	22.889	0	9.1383	343620000	5	Q8JZR2;Q5ND50;Q64010-2;Q64010;Q3TQV3;F7D232	Q8JZR2;Q5ND50;Q64010-2;Q64010	Adapter molecule crk	Crk
NaN	NaN	NaN	NaN	25.9121	26.0611	27.2048	26.9855	+	5	5	5	20.9	20.9	20.9	23.174	0	9.1097	1140000000	6	Q6IRU5-2;Q6IRU5;F7BHJ0;Q6IRU5-3	Q6IRU5-2;Q6IRU5;F7BHJ0;Q6IRU5-3	Clathrin light chain B	Cltb
NaN	NaN	NaN	NaN	NaN	24.562	24.1068	24.2072		2	2	2	6.7	6.7	6.7	61.378	0	9.0758	202080000	5	Q3ULD5	Q3ULD5	Methylcrotonoyl-CoA carboxylase beta chain, mitochondrial	Mccc2
NaN	NaN	NaN	NaN	25.5045	25.4943	26.0139	25.6671	+	5	5	5	6.9	6.9	6.9	98.601	0	9.0039	796220000	6	Q5KU39	Q5KU39	Vacuolar protein sorting-associated protein 41 homolog	Vps41
NaN	NaN	NaN	NaN	25.2466	25.1976	25.0151	24.8726	+	2	2	2	16.6	16.6	16.6	18.672	0	8.9162	353920000	3	Q9WTX5;E9PUV4	Q9WTX5;E9PUV4	S-phase kinase-associated protein 1	Skp1;Skp1a
NaN	NaN	NaN	NaN	NaN	25.9861	25.7315	26.2823		3	3	3	63.6	63.6	63.6	5.0256	0	8.7025	1232500000	4	Q6ZWY8;CON__P21752;A0A0N4SVF0	Q6ZWY8	Thymosin beta-10	Tmsb10
NaN	NaN	NaN	NaN	NaN	24.3373	24.3339	24.402		2	2	2	9.7	9.7	9.7	35.381	0	8.6968	170980000	3	F7B6X4;F6U2C2;E9QM77;O70305-2;O70305;A0A286YDU2;F6V8M6;O70305-3	F7B6X4;F6U2C2;E9QM77;O70305-2;O70305;A0A286YDU2;F6V8M6;O70305-3	Ataxin-2	Atxn2
NaN	NaN	NaN	NaN	24.4075	24.5197	24.3708	24.3803	+	2	2	2	30.8	30.8	30.8	11.914	0	8.6147	251110000	5	A0A494BAY0;A0A494BAR3;Q8R105	A0A494BAY0;A0A494BAR3;Q8R105	Vacuolar protein sorting-associated protein 37C	Vps37c
NaN	NaN	NaN	NaN	25.1295	25.5681	25.488	25.8985	+	3	3	3	21.2	21.2	21.2	21.732	0	8.6116	559490000	6	Q9DCR2;A0A286YD58;A0A286YDU3	Q9DCR2	AP-3 complex subunit sigma-1	Ap3s1
NaN	NaN	NaN	NaN	NaN	25.8518	26.0549	25.3308		3	3	3	8.3	8.3	8.3	55.871	0	8.546	668230000	5	Q8BYI6-2;Q8BYI6;Q8BYI6-3	Q8BYI6-2;Q8BYI6	Lysophosphatidylcholine acyltransferase 2	Lpcat2
NaN	NaN	NaN	NaN	25.3355	24.5931	24.7592	NaN		2	2	2	27.7	27.7	27.7	14.099	0	8.3489	273280000	3	G3UZY2;P97493;G3UX99;A2A439	G3UZY2;P97493;G3UX99;A2A439	Thioredoxin, mitochondrial	Txn2
NaN	NaN	NaN	NaN	25.0244	24.3896	24.8837	24.4216	+	5	5	5	6.4	6.4	6.4	89.909	0	8.3454	287370000	6	A2A7A7;Q8CFX1;A2A7A8	A2A7A7;Q8CFX1	GDH/6PGL endoplasmic bifunctional protein;Glucose 1-dehydrogenase;6-phosphogluconolactonase	H6pd
NaN	NaN	NaN	NaN	25.8006	24.6771	25.2054	NaN		6	6	4	7.6	7.6	5.2	102.71	0	8.2706	352840000	6	P46935;A0A571BDN7;A0A494BAE4;V9GWV8;Q3V335;A0A571BEP7	P46935;A0A571BDN7	E3 ubiquitin-protein ligase NEDD4	Nedd4
NaN	NaN	NaN	NaN	NaN	25.7078	25.7254	25.2896		4	4	4	11.1	11.1	11.1	51.121	0	8.1677	552760000	7	Q8VCK3;P83887	Q8VCK3;P83887	Tubulin gamma-2 chain;Tubulin gamma-1 chain	Tubg2;Tubg1
NaN	NaN	NaN	NaN	NaN	25.9188	25.2873	25.5301		3	3	3	37.4	37.4	37.4	10.953	0	8.154	474030000	3	Q9D8T7-2;Q9D8T7;F7DE82;F8WHU8	Q9D8T7-2;Q9D8T7	SRA stem-loop-interacting RNA-binding protein, mitochondrial	Slirp
NaN	NaN	NaN	NaN	25.8126	25.9133	25.0402	NaN		2	2	2	8	8	8	37.896	0	8.1415	465060000	4	G5E881;Q3TUH1;D6RGT1;G3UWL8;Q3TUH1-2	G5E881;Q3TUH1;D6RGT1;G3UWL8;Q3TUH1-2	Phosphatidate cytidylyltransferase, mitochondrial	Tamm41
NaN	NaN	NaN	NaN	24.3973	24.3913	24.3357	NaN		2	2	2	4.7	4.7	4.7	59.262	0	8.1177	235140000	4	Q00612;A3KG36;G3UWD6;P97324	Q00612;A3KG36;G3UWD6;P97324	Glucose-6-phosphate 1-dehydrogenase X;Glucose-6-phosphate 1-dehydrogenase;Glucose-6-phosphate 1-dehydrogenase 2	G6pdx;G6pd2
NaN	NaN	NaN	NaN	26.679	25.6943	25.3653	25.6286	+	3	3	3	23.5	23.5	23.5	35.334	0	8.0682	599420000	7	Q9CZR8	Q9CZR8	Elongation factor Ts, mitochondrial	Tsfm
NaN	NaN	NaN	NaN	NaN	24.4908	24.6165	24.3999		4	4	4	10.7	10.7	10.7	61.447	0	7.9274	224900000	5	A2AJ72;Q3TIX6;A0A0A6YVV5;A0A0A6YX76;A2AJ71;A0A0A6YY39;F7AM43	A2AJ72;Q3TIX6;A0A0A6YVV5		Fubp3
NaN	NaN	NaN	NaN	26.3082	25.5311	NaN	26.0817		3	3	3	21.3	21.3	21.3	17.725	0	7.9041	475910000	5	Q9D6U8;A0A338P6X2	Q9D6U8;A0A338P6X2	Protein FAM162A	Fam162a
NaN	NaN	NaN	NaN	25.1185	25.3812	24.7839	NaN		4	4	4	1.7	1.7	1.7	273.81	0	7.8772	469040000	3	Q07113	Q07113	Cation-independent mannose-6-phosphate receptor	Igf2r
NaN	NaN	NaN	NaN	25.7285	23.575	23.8012	NaN		4	4	4	17.2	17.2	17.2	37.548	0	7.8255	276090000	4	Q8R4N0	Q8R4N0	Citrate lyase subunit beta-like protein, mitochondrial	Clybl
NaN	NaN	NaN	NaN	24.8077	25.326	25.9113	NaN		3	3	3	16	16	16	11.346	0	7.7949	549670000	5	A0A0A6YY66;Q8BSN6;O70480	A0A0A6YY66;Q8BSN6;O70480	Vesicle-associated membrane protein 4	Vamp4
NaN	NaN	NaN	NaN	25.9025	26.5324	26.0262	26.4618	+	3	3	3	18.4	18.4	18.4	26.388	0	7.6721	781150000	5	E9Q4M4;Q91VN4	E9Q4M4;Q91VN4	MICOS complex subunit Mic25	Chchd6
NaN	NaN	NaN	NaN	NaN	24.7332	25.0174	24.6363		3	3	3	5.4	5.4	5.4	63.085	0	7.6604	319120000	4	Q9Z1Q2;G3UX11	Q9Z1Q2	Abhydrolase domain-containing protein 16A	Abhd16a
NaN	NaN	NaN	NaN	24.9795	24.335	24.4948	24.2859	+	4	4	4	15.3	15.3	15.3	33.225	0	7.6361	403260000	5	Z4YKT6;Q99J47-2;Q99J47	Z4YKT6;Q99J47-2;Q99J47	Dehydrogenase/reductase SDR family member 7B	Dhrs7b
NaN	NaN	NaN	NaN	24.024	25.1191	25.5059	26.312	+	4	4	4	5.3	5.3	5.3	91.816	0	7.6038	714760000	5	Q3UN10;P56695;F7D926	Q3UN10;P56695;F7D926	Wolframin	Wfs1
NaN	NaN	NaN	NaN	24.0406	24.6688	25.0407	24.7343	+	4	4	4	5.9	5.9	5.9	119.31	0	7.5964	277490000	4	Q8R4U7	Q8R4U7	Leucine zipper protein 1	Luzp1
NaN	NaN	NaN	NaN	NaN	25.3936	25.0539	25.2785		5	5	5	7.6	7.6	7.6	84.194	0	7.573	377490000	5	Q5F258;Q68FF6;F6U8T2;F7BIK4;Q80XR8;J3QK07;D3Z1I2;E9PVA6;Q9JLQ2	Q5F258;Q68FF6	ARF GTPase-activating protein GIT1	Git1
NaN	NaN	NaN	NaN	25.5315	25.4273	25.1625	25.4209	+	6	4	4	11.7	9.6	9.6	56.381	0	7.5589	481920000	8	Q61235;B7ZNU9	Q61235;B7ZNU9	Beta-2-syntrophin	Sntb2
NaN	NaN	NaN	NaN	NaN	24.6755	24.7903	24.933		3	3	3	10.9	10.9	10.9	46.049	0	7.5043	259330000	5	Q61029-3;Q61029;Q61029-2;Q61033-2;Q61029-4;Q61033	Q61029-3;Q61029;Q61029-2	Lamina-associated polypeptide 2, isoforms beta/delta/epsilon/gamma	Tmpo
NaN	NaN	NaN	NaN	24.1632	23.9218	23.9148	24.1329	+	3	3	3	14.1	14.1	14.1	35.015	0	7.479	170420000	5	Q8K183	Q8K183	Pyridoxal kinase	Pdxk
NaN	NaN	NaN	NaN	25.6847	NaN	24.9331	25.2521		3	3	3	9.9	9.9	9.9	54.386	0	7.4346	353730000	4	Q9EQG7	Q9EQG7	Ectonucleotide pyrophosphatase/phosphodiesterase family member 5	Enpp5
NaN	NaN	NaN	NaN	24.5941	25.4927	24.3259	NaN		2	2	2	18.6	18.6	18.6	19.183	0	7.4287	311490000	5	D3Z5B1;B2RPU8;Q9D1L0	D3Z5B1;B2RPU8;Q9D1L0	Coiled-coil-helix-coiled-coil-helix domain-containing protein 2	Zbed5;Chchd2
NaN	NaN	NaN	NaN	NaN	25.1529	25.0936	24.9656		5	4	4	5.5	4.2	4.2	116.05	0	7.428	348560000	5	Q5F2E8;F6RXB5	Q5F2E8	Serine/threonine-protein kinase TAO1	Taok1
NaN	NaN	NaN	NaN	26.1425	25.319	25.5473	25.5198	+	2	2	2	21.3	21.3	21.3	14.286	0	7.3957	879770000	10	Q9D023	Q9D023	Mitochondrial pyruvate carrier 2	Mpc2
NaN	NaN	NaN	NaN	24.4205	24.1815	23.9609	23.9208	+	2	2	2	2	2	2	131.63	0	7.1627	203840000	6	P27046	P27046	Alpha-mannosidase 2	Man2a1
NaN	NaN	NaN	NaN	26.087	25.4042	25.7341	25.9429	+	3	3	3	6.2	6.2	6.2	63.607	0	7.1033	605510000	4	S4R2E1;A0A0R4J0B6;Q7TMS5;D3YZX5;A0A0N4SWA2;D3Z150;D3YVG8	S4R2E1;A0A0R4J0B6;Q7TMS5;D3YZX5;A0A0N4SWA2;D3Z150	ATP-binding cassette sub-family G member 2	Abcg2
NaN	NaN	NaN	NaN	23.837	24.1421	NaN	25.2218		2	2	2	9.9	9.9	9.9	35.152	0	7.0857	211040000	4	Q8BJH1;Q8BJH1-2	Q8BJH1;Q8BJH1-2	Zinc finger C2HC domain-containing protein 1A	Zc2hc1a
NaN	NaN	NaN	NaN	26.256	25.4513	25.5852	25.6937	+	3	3	3	3.4	3.4	3.4	96.904	0	7.069	723660000	7	Q62165	Q62165	Dystroglycan;Alpha-dystroglycan;Beta-dystroglycan	Dag1
NaN	NaN	NaN	NaN	25.8169	25.6144	26.212	25.7877	+	3	3	3	11.7	11.7	11.7	39.842	0	7.0214	650250000	6	Q06138;Q9DB16-2;Q9DB16	Q06138	Calcium-binding protein 39	Cab39
NaN	NaN	NaN	NaN	27.0054	26.8207	26.6292	26.5341	+	2	2	2	32.7	32.7	32.7	11.655	0	6.9834	1128800000	5	Q5F285	Q5F285	Transmembrane protein 256	Tmem256
NaN	NaN	NaN	NaN	NaN	26.2677	25.6321	25.2398		3	3	1	10.9	10.9	3.6	33.05	0	6.9681	575820000	6	A0A0A6YXE3;A0A0A6YWB0;G3X9Q0;A0A0A6YVV8;Q9JKP5;A0A0A6YXP3;A0A0A6YWJ5;A0A2I3BRX8;Q3U570;A0A0A6YWG1;Q3U581;A0A0A6YXQ4	A0A0A6YXE3;A0A0A6YWB0;G3X9Q0;A0A0A6YVV8;Q9JKP5;A0A0A6YXP3	Muscleblind-like protein 1	Mbnl1
NaN	NaN	NaN	NaN	25.6199	25.3567	25.209	25.362	+	7	3	3	17.6	8.1	8.1	60.629	0	6.9656	666050000	8	Q04736;A0A0J9YUV2	Q04736	Tyrosine-protein kinase Yes	Yes1
NaN	NaN	NaN	NaN	NaN	24.9186	26.2377	24.8261		5	5	5	20.7	20.7	20.7	37.316	0	6.8879	448530000	6	O88736;Q8C5N9	O88736;Q8C5N9	3-keto-steroid reductase	Hsd17b7
NaN	NaN	NaN	NaN	NaN	24.668	24.9011	24.3083		3	3	3	10.4	10.4	10.4	43.221	0	6.8142	267640000	5	Q8BP48	Q8BP48	Methionine aminopeptidase 1	Metap1
NaN	NaN	NaN	NaN	24.8861	24.3001	24.6219	NaN		3	3	3	5.2	5.2	5.2	88.196	0	6.7616	310630000	8	Q7TPM9	Q7TPM9	Myotubularin-related protein 10	Mtmr10
NaN	NaN	NaN	NaN	24.8063	24.7598	26.0071	NaN		4	4	4	19.6	19.6	19.6	25.219	0	6.7064	476990000	5	Q9CQ10;A0A0N4SUX9;A0A0N4SV76;A0A0N4SVS3	Q9CQ10;A0A0N4SUX9	Charged multivesicular body protein 3	Chmp3
NaN	NaN	NaN	NaN	NaN	24.2349	25.0793	24.182		5	3	3	11.5	7	7	52.178	0	6.6986	217830000	3	A0A0R4J0T5;P28659-2;P28659-3;P28659;P28659-4	A0A0R4J0T5;P28659-2;P28659-3;P28659;P28659-4	CUGBP Elav-like family member 1	Celf1
NaN	NaN	NaN	NaN	24.5895	24.0304	24.8623	24.4055	+	5	3	3	15.1	10.3	10.3	46.916	0	6.6496	384390000	9	Q8R2R9	Q8R2R9	AP-3 complex subunit mu-2	Ap3m2
NaN	NaN	NaN	NaN	26.102	26.1903	26.2376	NaN		3	3	3	12.8	12.8	12.8	20.313	0	6.6026	1210600000	6	Q6ZWQ7	Q6ZWQ7		Spcs3
NaN	NaN	NaN	NaN	25.1135	24.8206	24.5346	24.738	+	2	2	2	24.2	24.2	24.2	20.52	0	6.5941	300290000	4	Q9CY16	Q9CY16	28S ribosomal protein S28, mitochondrial	Mrps28
NaN	NaN	NaN	NaN	24.299	25.3512	26.4272	25.4487	+	6	2	2	26.7	11.6	11.6	30.764	0	6.5223	536840000	3	Q9JKB3-2;Q9JKB3	Q9JKB3-2;Q9JKB3	Y-box-binding protein 3	Ybx3
NaN	NaN	NaN	NaN	23.8579	24.3832	24.1242	24.1338	+	3	3	3	14.2	14.2	14.2	34.28	0	6.4116	214250000	3	Q9CYG7-2;Q9CYG7	Q9CYG7-2;Q9CYG7	Mitochondrial import receptor subunit TOM34	Tomm34
NaN	NaN	NaN	NaN	25.4086	24.7558	24.5454	24.7739	+	4	4	4	17.8	17.8	17.8	33.097	0	6.4102	377600000	7	Q99J99;A0A2R8VHT1;A0A2R8VHE5	Q99J99;A0A2R8VHT1	3-mercaptopyruvate sulfurtransferase	Mpst
NaN	NaN	NaN	NaN	26.9152	26.3189	26.0131	NaN		3	3	3	15.6	15.6	15.6	39.774	0	6.3739	848770000	4	O88374;A0A1B0GX27;O35855;A0A1B0GST1;A0A1B0GQY4	O88374;A0A1B0GX27;O35855	Branched-chain-amino-acid aminotransferase;Branched-chain-amino-acid aminotransferase, mitochondrial	Bcat2
NaN	NaN	NaN	NaN	25.1026	25.0404	NaN	26.0748		3	3	3	17.6	17.6	17.6	21.654	0	6.3681	885880000	6	Q62393-3;D3Z637;D3Z125;E9PUA7;D3Z7X7;F8WHQ1;Q62393-2;Q62393;D3Z2U2	Q62393-3;D3Z637;D3Z125;E9PUA7;D3Z7X7;F8WHQ1;Q62393-2;Q62393	Tumor protein D52	Tpd52
NaN	NaN	NaN	NaN	26.2332	26.5543	26.4291	26.7173	+	3	3	3	37.5	37.5	37.5	15.515	0	6.3258	1435500000	9	Q3UIU2;A2AP32	Q3UIU2;A2AP32	NADH dehydrogenase [ubiquinone] 1 beta subcomplex subunit 6	Ndufb6
NaN	NaN	NaN	NaN	25.1406	23.9181	24.3719	24.4502	+	11	3	3	40.4	19.7	19.7	22.006	0	6.3188	240240000	4	Q62159;H3BL56;A0A0G2JEP8	Q62159;H3BL56;A0A0G2JEP8	Rho-related GTP-binding protein RhoC	Rhoc
NaN	NaN	NaN	NaN	23.7064	24.748	24.1811	23.0881	+	2	2	2	7.4	7.4	7.4	58.279	0	6.2153	185690000	4	Q03963	Q03963	Interferon-induced, double-stranded RNA-activated protein kinase	Eif2ak2
NaN	NaN	NaN	NaN	24.0297	24.6431	25.8282	23.1883	+	3	3	3	6.8	6.8	6.8	71.781	0	6.2046	367140000	4	Q99LE6	Q99LE6	ATP-binding cassette sub-family F member 2	Abcf2
NaN	NaN	NaN	NaN	NaN	23.4251	24.2122	23.2727		2	2	2	7.5	7.5	7.5	38.833	0	6.1054	140640000	3	Q5EBP8;P49312-2;P49312	Q5EBP8;P49312-2;P49312	Heterogeneous nuclear ribonucleoprotein A1;Heterogeneous nuclear ribonucleoprotein A1, N-terminally processed	Hnrnpa1
NaN	NaN	NaN	NaN	24.5961	25.1326	24.6308	24.5163	+	4	4	4	11.9	11.9	11.9	33.816	0	6.1021	445920000	8	Q80XR6;Q20BD0;Q99020	Q80XR6;Q20BD0;Q99020	Heterogeneous nuclear ribonucleoprotein A/B	Hnrnpab
NaN	NaN	NaN	NaN	24.8146	NaN	24.4684	24.553		4	3	3	11.6	9.4	9.4	39.502	0	6.0944	213940000	5	Q9JHJ0;A0A1L1SU70;Q9JKK7-3;Q9JKK7	Q9JHJ0	Tropomodulin-3	Tmod3
NaN	NaN	NaN	NaN	25.1097	25.0719	24.6423	24.5012	+	2	2	2	4.2	4.2	4.2	69.07	0	5.9716	420870000	4	Q8JZN7;H3BKL2	Q8JZN7;H3BKL2	Mitochondrial Rho GTPase 2	Rhot2
NaN	NaN	NaN	NaN	26.0916	NaN	25.8587	25.7954		3	3	3	6.8	6.8	6.8	65.767	0	5.9566	805170000	6	Q6P572;Q9Z2D1;B8JJF3	Q6P572;Q9Z2D1	Myotubularin-related protein 2	Mtmr2
NaN	NaN	NaN	NaN	25.696	25.4524	25.3505	25.307	+	4	4	4	7.7	7.7	7.7	46.798	0	5.9455	520460000	5	A0A0A6YVZ8;B7ZNR9;B2RUE8;A0A0A6YWR8;F8VPL5;A0A0A6YWM8;E9PVG7;A0A0A6YW53;P97820;E0CZF8;E0CZD7;E0CXD6;E0CY98;E9PUL9;Q5SXG1;Q5SXG3;G3X9G2;B9EKN8;B2RQ80;P83510-2;Q9JM52-2;Q9JM52;P83510;Q9JM52-3;E0CYV5;F7AMS7	A0A0A6YVZ8;B7ZNR9;B2RUE8;A0A0A6YWR8;F8VPL5;A0A0A6YWM8;E9PVG7;A0A0A6YW53;P97820;E0CZF8;E0CZD7;E0CXD6;E0CY98;E9PUL9;Q5SXG1;Q5SXG3;G3X9G2;B9EKN8;B2RQ80;P83510-2;Q9JM52-2;Q9JM52;P83510;Q9JM52-3;E0CYV5	Mitogen-activated protein kinase kinase kinase kinase 4;Traf2 and NCK-interacting protein kinase;Misshapen-like kinase 1	Map4k4;Tnik;Mink1
NaN	NaN	NaN	NaN	23.7213	24.9389	24.2272	24.2135	+	3	3	3	3.2	3.2	3.2	182.63	0	5.8728	261050000	5	Q8BUR4-2;Q8BUR4;A0A1B0GSI1	Q8BUR4-2;Q8BUR4;A0A1B0GSI1	Dedicator of cytokinesis protein 1	Dock1
NaN	NaN	NaN	NaN	25.0868	24.3815	24.783	24.9775	+	3	3	3	15.2	15.2	15.2	38.768	0	5.8668	291920000	4	Q99LB4;D3YTL5;P24452;D3YZN3;D3YU77	Q99LB4;D3YTL5;P24452	Macrophage-capping protein	Capg
NaN	NaN	NaN	NaN	24.8329	25.1214	25.2029	NaN		3	3	3	5.6	5.6	5.6	78.505	0	5.8527	364890000	4	A2AAN0;O35250-2;O35250	A2AAN0;O35250-2;O35250	Exocyst complex component 7	Exoc7
NaN	NaN	NaN	NaN	25.6577	26.1656	NaN	26.3517		4	4	4	5.4	5.4	5.4	130.81	0	5.8186	762590000	4	Q3V3R4	Q3V3R4	Integrin alpha-1	Itga1
NaN	NaN	NaN	NaN	26.0542	24.3681	25.0586	24.7214	+	4	4	4	5.9	5.9	5.9	83.42	0	5.7096	374380000	7	Q7TMQ7;S4R1X1	Q7TMQ7;S4R1X1	WD repeat-containing protein 91	Wdr91
NaN	NaN	NaN	NaN	25.8097	26.5322	25.8292	25.7136	+	2	2	2	18.2	18.2	18.2	16.331	0	5.6895	689860000	6	Q9CR61	Q9CR61	NADH dehydrogenase [ubiquinone] 1 beta subcomplex subunit 7	Ndufb7
NaN	NaN	NaN	NaN	24.6972	24.3631	24.5515	NaN		2	2	2	12.7	12.7	12.7	22.965	0	5.6682	221160000	3	Q9R1P1	Q9R1P1	Proteasome subunit beta type-3	Psmb3
NaN	NaN	NaN	NaN	26.2665	24.9511	25.2647	25.2399	+	3	3	3	12.2	12.2	12.2	25.395	0	5.6259	450840000	5	Q9CXT7-2;Q9CXT7;A0A1B0GS44	Q9CXT7-2;Q9CXT7	Transmembrane protein 192	Tmem192
NaN	NaN	NaN	NaN	24.711	24.8198	24.6675	NaN		2	2	2	10.5	10.5	10.5	41.61	0	5.5017	278870000	4	E9Q179;Q8C5Q4;D3YV30;D3YUN1	E9Q179;Q8C5Q4;D3YV30;D3YUN1	G-rich sequence factor 1	Grsf1
NaN	NaN	NaN	NaN	25.6266	26.1457	26.2546	25.6582	+	2	2	2	3.4	3.4	3.4	62.193	0	5.4395	958950000	7	E9PUL6;F7B0S9;A0A0R4J0Z4;Q8CGQ8-2;Q8CGQ8	E9PUL6;F7B0S9;A0A0R4J0Z4;Q8CGQ8-2;Q8CGQ8	Sodium/potassium/calcium exchanger 4	Slc24a4
NaN	NaN	NaN	NaN	25.2847	23.9547	24.8462	24.6829	+	2	2	2	4.5	4.5	4.5	55.483	0	5.3967	282860000	5	E0CXC7;Q8CIF6;Q8CIF6-2	E0CXC7;Q8CIF6;Q8CIF6-2	SID1 transmembrane family member 2	Sidt2
NaN	NaN	NaN	NaN	24.9888	25.2393	24.9347	24.9503	+	4	4	4	9.8	9.8	9.8	52.241	0	5.3572	372790000	5	Q8CBY8-2;Q8CBY8;Q3TRR2	Q8CBY8-2;Q8CBY8	Dynactin subunit 4	Dctn4
NaN	NaN	NaN	NaN	24.7368	24.7663	24.8851	24.8356	+	3	3	3	16.2	16.2	16.2	23.562	0	5.3061	520930000	5	P97348;G3X9Y4;A0A494B9H3	P97348;G3X9Y4;A0A494B9H3	Rho-related GTP-binding protein RhoD	Rhod
NaN	NaN	NaN	NaN	24.486	24.8825	24.7946	24.833	+	3	3	3	11.1	11.1	11.1	31.837	0	5.2631	284590000	5	J3QQ30;J3QPW1;P53810;F8WGG5;Q8JZZ5;P53811	J3QQ30;J3QPW1;P53810;F8WGG5	Phosphatidylinositol transfer protein alpha isoform	Pitpna
NaN	NaN	NaN	NaN	23.6072	24.3537	23.9759	23.8245	+	3	3	3	3.7	3.7	3.7	86.454	0	5.223	181340000	4	Q6KAR6;A0A1Y7VKY4	Q6KAR6	Exocyst complex component 3	Exoc3
NaN	NaN	NaN	NaN	24.541	24.1403	25.0182	NaN		4	3	3	8.2	5.7	5.7	85.546	0	5.1896	311210000	4	Q8C605;Q9WUA3;Q9WUA3-2;D3YUA3;F6YL81	Q8C605;Q9WUA3;Q9WUA3-2;D3YUA3	ATP-dependent 6-phosphofructokinase;ATP-dependent 6-phosphofructokinase, platelet type	Pfkp
NaN	NaN	NaN	NaN	24.9988	25.1486	25.8864	26.0504	+	4	4	4	19.2	19.2	19.2	47.335	0	5.0851	521160000	6	Q91XU3	Q91XU3	Phosphatidylinositol 5-phosphate 4-kinase type-2 gamma	Pip4k2c
NaN	NaN	NaN	NaN	24.4986	24.9433	24.257	NaN		2	2	2	8.1	8.1	8.1	50.773	0	5.0718	308170000	3	Q3U3J1;P50136	Q3U3J1;P50136	2-oxoisovalerate dehydrogenase subunit alpha, mitochondrial	Bckdha
NaN	NaN	NaN	NaN	27.2985	26.6651	25.5838	26.7888	+	5	2	2	2.5	0.8	0.8	228.56	0	5.0662	1012900000	5	K3W4R2;Q6URW6-2;Q6URW6;Q6URW6-3;A0A140LI60	K3W4R2;Q6URW6-2;Q6URW6;Q6URW6-3;A0A140LI60	Myosin-14	Myh14
NaN	NaN	NaN	NaN	24.7884	24.9075	25.6332	24.5176	+	2	2	2	23.6	23.6	23.6	18.933	0	5.0484	385590000	3	Q3U957;Q8BNI4;Q8BNI4-2	Q3U957;Q8BNI4;Q8BNI4-2	Derlin-2	Derl2
NaN	NaN	NaN	NaN	NaN	24.5572	25.3909	24.7187		3	3	3	20.1	20.1	20.1	22.848	0	4.9482	346090000	2	Q8BXC6;G3X955	Q8BXC6	COMM domain-containing protein 2	Commd2
NaN	NaN	NaN	NaN	23.5935	23.589	24.2952	NaN		3	3	1	5.1	5.1	1.6	79.091	0	4.8961	279610000	3	E9Q9N6;E9PYX3;A0A0R4J227;A0A0R4J0B1;Q3T9A3;F6ZS70;E9QMP6;Q05512-3;Q05512-4;Q05512-2;Q05512;E9Q2J6;Q8VHJ5;E9Q2G8;E9Q8H5;A0A0A6YY78;Q8CIP4-2;Q8CIP4	E9Q9N6;E9PYX3;A0A0R4J227;A0A0R4J0B1;Q3T9A3;F6ZS70;E9QMP6;Q05512-3;Q05512-4;Q05512-2;Q05512;E9Q2J6;Q8VHJ5	Serine/threonine-protein kinase MARK2;Serine/threonine-protein kinase MARK1	Mark2;Mark1
NaN	NaN	NaN	NaN	25.5409	25.7408	25.7646	25.7826	+	8	2	2	47.6	7.8	7.8	23.553	0	4.8915	548560000	4	P63321;A0A1Y7VL93	P63321;A0A1Y7VL93	Ras-related protein Ral-A	Rala
NaN	NaN	NaN	NaN	23.9873	23.7989	24.0424	NaN		2	2	2	2.1	2.1	2.1	139.55	0	4.8715	143740000	6	A0A0N4SW73;Q8R361	A0A0N4SW73;Q8R361	Rab11 family-interacting protein 5	Rab11fip5
NaN	NaN	NaN	NaN	25.66	26.0612	25.9167	25.6814	+	3	3	3	19.3	19.3	19.3	13.779	0	4.8265	616410000	5	P01887	P01887	Beta-2-microglobulin	B2m
NaN	NaN	NaN	NaN	NaN	23.8407	23.5585	23.9236		2	2	2	6.5	6.5	6.5	41.921	0	4.8093	130570000	2	A0A494BAG1;O88520	A0A494BAG1;O88520	Leucine-rich repeat protein SHOC-2	Shoc2
NaN	NaN	NaN	NaN	24.3448	24.9292	25.3566	NaN		2	2	2	6.1	6.1	6.1	46.217	0	4.7906	300930000	5	E9Q4P1	E9Q4P1		Wdfy1
NaN	NaN	NaN	NaN	NaN	24.6584	24.491	25.5336		3	3	3	8.4	8.4	8.4	68.995	0	4.7115	326030000	3	Q6A028	Q6A028	Switch-associated protein 70	Swap70
NaN	NaN	NaN	NaN	23.6516	24.7318	23.9308	23.5909	+	2	2	2	13.5	13.5	13.5	21.942	0	4.7071	186180000	2	Q66GT5;A0A7N9VS33	Q66GT5;A0A7N9VS33	Phosphatidylglycerophosphatase and protein-tyrosine phosphatase 1	Ptpmt1
NaN	NaN	NaN	NaN	25.9358	25.4554	25.7293	25.5533	+	2	2	2	10.8	10.8	10.8	43.994	0	4.6506	527660000	6	Q99PL6-2;Q99PL6	Q99PL6-2;Q99PL6	UBX domain-containing protein 6	Ubxn6
NaN	NaN	NaN	NaN	24.9795	24.6117	25.5019	NaN		2	2	2	21.4	21.4	21.4	15.531	0	4.6348	357300000	3	P21460;A2APX3	P21460;A2APX3	Cystatin-C	Cst3
NaN	NaN	NaN	NaN	25.6555	24.4887	24.3657	NaN		2	2	2	13.2	13.2	13.2	23.273	0	4.6342	283550000	3	Q91VM9-2;Q91VM9;G8JL76;D3Z636	Q91VM9-2;Q91VM9;G8JL76;D3Z636	Inorganic pyrophosphatase 2, mitochondrial	Ppa2
NaN	NaN	NaN	NaN	24.0418	24.4619	24.3671	24.3489	+	2	2	2	3.6	3.6	3.6	80.974	0	4.6065	243710000	4	P58404-2;P58404;V9GXE7;V9GXI9	P58404-2;P58404;V9GXE7;V9GXI9	Striatin-4	Strn4
NaN	NaN	NaN	NaN	25.9553	26.1906	25.4836	26.1801	+	3	3	3	4.8	4.8	4.8	67.507	0	4.5462	638310000	4	A0A498WGK6;Q9ET30	A0A498WGK6;Q9ET30	Transmembrane 9 superfamily member 3	Tm9sf3
NaN	NaN	NaN	NaN	25.0094	24.8585	25.1661	NaN		3	3	3	10.9	10.9	10.9	50.118	0	4.511	348810000	4	Q3TJD7;Q8BVJ7;Q3TJD7-2	Q3TJD7	PDZ and LIM domain protein 7	Pdlim7
NaN	NaN	NaN	NaN	NaN	24.6942	24.4606	25.0597		2	2	2	3.5	3.5	3.5	99.503	0	4.4879	298980000	4	A2ASW8;Q9EQZ6-2;Q9EQZ6-3;Q9EQZ6	A2ASW8;Q9EQZ6-2;Q9EQZ6-3;Q9EQZ6	Rap guanine nucleotide exchange factor 4	Rapgef4
NaN	NaN	NaN	NaN	NaN	24.6118	24.4185	24.6083		2	2	2	29.9	29.9	29.9	11.101	0	4.4828	343970000	3	Q3UGS4	Q3UGS4	Protein FAM195B	Fam195b
NaN	NaN	NaN	NaN	25.7199	24.8624	25.202	25.3243	+	2	2	2	12.3	12.3	12.3	12.811	0	4.4505	390930000	3	Q9JJU8	Q9JJU8	SH3 domain-binding glutamic acid-rich-like protein	Sh3bgrl
NaN	NaN	NaN	NaN	24.9021	24.7352	24.4473	NaN		2	2	2	6.3	6.3	6.3	46.674	0	4.4152	244110000	5	O88844;D3YVY3;A0A087WPT4;A0A087WRS9	O88844;D3YVY3;A0A087WPT4;A0A087WRS9	Isocitrate dehydrogenase [NADP] cytoplasmic	Idh1
NaN	NaN	NaN	NaN	24.5032	24.2103	23.935	NaN		2	2	2	8.5	8.5	8.5	29.572	0	4.3893	169570000	3	Q9ERB0	Q9ERB0	Synaptosomal-associated protein 29	Snap29
NaN	NaN	NaN	NaN	25.245	24.8005	24.6523	24.9033	+	3	3	3	9.6	9.6	9.6	32.115	0	4.3509	344540000	4	Q6PE15-2;Q6PE15	Q6PE15-2;Q6PE15	Mycophenolic acid acyl-glucuronide esterase, mitochondrial	Abhd10
NaN	NaN	NaN	NaN	NaN	25.9795	25.2944	25.6943		4	4	4	22.1	22.1	22.1	22.346	0	4.2933	461880000	4	A0A0G2JGJ1;Q8BVI4;A0A0G2JGY0;D3Z1A1;D3YWR7;D3Z099	A0A0G2JGJ1;Q8BVI4;A0A0G2JGY0;D3Z1A1;D3YWR7	Dihydropteridine reductase	Qdpr
NaN	NaN	NaN	NaN	25.4222	25.626	24.9309	NaN		2	2	2	8.3	8.3	8.3	50.498	0	4.2808	541040000	4	Q3U422	Q3U422		Ndufv3
NaN	NaN	NaN	NaN	25.0397	24.099	24.744	24.823	+	7	2	2	20.9	6.6	6.6	48.157	0	4.2416	286600000	5	Q9Z2W1;D3Z359;A0A087WQY6	Q9Z2W1;D3Z359	Serine/threonine-protein kinase 25	Stk25
NaN	NaN	NaN	NaN	24.4752	NaN	25.2424	24.5864		2	2	2	7.2	7.2	7.2	25.134	0	4.0847	333730000	5	Q9DB34;A0A1B0GSH4;A0A1B0GT75;A0A1B0GR63	Q9DB34;A0A1B0GSH4;A0A1B0GT75;A0A1B0GR63	Charged multivesicular body protein 2a	Chmp2a
NaN	NaN	NaN	NaN	25.007	NaN	24.04	24.4164		2	2	2	1.9	1.9	1.9	161.66	0	4.0118	205820000	3	Q8R422	Q8R422	CD109 antigen	Cd109
NaN	NaN	NaN	NaN	24.3328	24.8122	24.4832	24.6395	+	2	2	2	5.9	5.9	5.9	39.816	0	3.9523	247630000	3	Q9Z1Z0-4;Q9Z1Z0;Q9Z1Z0-2	Q9Z1Z0-4;Q9Z1Z0;Q9Z1Z0-2	General vesicular transport factor p115	Uso1
NaN	NaN	NaN	NaN	24.0842	23.7446	24.1668	24.2798	+	2	2	2	7.7	7.7	7.7	32.646	0	3.856	196240000	4	E9Q715;Q05CX5;Q7TNC4-2;Q7TNC4-3;Q7TNC4-4;Q7TNC4;D3Z765;A0A0R4J047;Q9CYI4-2;Q9CYI4	E9Q715;Q05CX5;Q7TNC4-2;Q7TNC4-3;Q7TNC4-4;Q7TNC4;D3Z765;A0A0R4J047;Q9CYI4-2;Q9CYI4	Putative RNA-binding protein Luc7-like 2;Putative RNA-binding protein Luc7-like 1	Luc7l2;Luc7l
NaN	NaN	NaN	NaN	23.9385	24.6601	NaN	24.4847		2	2	2	4.1	4.1	4.1	75.329	0	3.8161	226540000	4	P58021	P58021	Transmembrane 9 superfamily member 2	Tm9sf2
NaN	NaN	NaN	NaN	25.3973	25.1787	25.2743	25.1364	+	2	2	2	45.3	45.3	45.3	10.657	0	3.6941	390300000	2	A0A087WQE6;A0A087WNT1;P83940;A0A087WPE4	A0A087WQE6;A0A087WNT1;P83940;A0A087WPE4	Transcription elongation factor B polypeptide 1	Tceb1
NaN	NaN	NaN	NaN	24.5062	24.8476	25.5551	NaN		2	2	2	33.3	33.3	33.3	10.182	0	3.6754	347040000	2	E0CZ07;A0A140LHW6;Q99J21;Q99J21-2	E0CZ07;A0A140LHW6;Q99J21;Q99J21-2	Mucolipin-1	Mcoln1
NaN	NaN	NaN	NaN	24.325	24.4148	23.9169	NaN		2	2	2	4.6	4.6	4.6	76.711	0	3.6355	239490000	3	Q8K0M3;A0A2I3BS41;Q9R1Z8	Q8K0M3;A0A2I3BS41;Q9R1Z8	Vinexin	Sorbs3
NaN	NaN	NaN	NaN	26.4153	NaN	25.8381	26.1447		3	3	3	25.7	25.7	25.7	21.737	0	3.5746	781630000	3	Q99KR7	Q99KR7	Peptidyl-prolyl cis-trans isomerase F, mitochondrial	Ppif
NaN	NaN	NaN	NaN	25.6389	25.3303	25.2578	25.4732	+	1	1	1	16.5	16.5	16.5	15.525	0	3.5562	439560000	6	Q8VEA4	Q8VEA4	Mitochondrial intermembrane space import and assembly protein 40	Chchd4
NaN	NaN	NaN	NaN	24.7748	24.7606	24.2353	NaN		2	2	2	10.2	10.2	10.2	33.541	0	3.4725	395710000	8	Q9CPR5;A0A0A6YVP4;Q9CPR5-2	Q9CPR5;A0A0A6YVP4;Q9CPR5-2	39S ribosomal protein L15, mitochondrial	Mrpl15
NaN	NaN	NaN	NaN	NaN	24.6905	24.4009	24.4143		2	2	2	8.8	8.8	8.8	25.378	0	3.3733	317690000	6	Q60692	Q60692	Proteasome subunit beta type-6	Psmb6
NaN	NaN	NaN	NaN	24.6502	24.4979	24.6133	NaN		3	3	3	4.3	4.3	4.3	87.861	0	3.3263	250290000	3	D3Z4C0;Q91VS8	D3Z4C0;Q91VS8	FERM, RhoGEF and pleckstrin domain-containing protein 2	Farp2
NaN	NaN	NaN	NaN	24.7824	NaN	24.7031	24.9185		2	2	2	6.3	6.3	6.3	44.673	0	3.2553	298280000	3	S4R1B0;S4R203;S4R248;A0A0A0MQ95;B2RUJ8;S4R221;Q8C0D4;S4R2V0	S4R1B0;S4R203;S4R248;A0A0A0MQ95;B2RUJ8;S4R221;Q8C0D4;S4R2V0	Rho GTPase-activating protein 12	Arhgap12
NaN	NaN	NaN	NaN	24.8958	25.082	24.8466	25.1381	+	2	2	2	2.2	2.2	2.2	127.25	0	3.0969	457790000	4	A0A0U1RPW2;B9EHJ3;P39447	A0A0U1RPW2;B9EHJ3;P39447	Tight junction protein ZO-1	Tjp1
NaN	NaN	NaN	NaN	23.6707	23.7187	23.9284	23.8235	+	3	2	2	7.3	5.2	5.2	49.829	0	3.0856	185920000	3	A0A0R4J233;A0A1W2P6J7;Q8C650-2;Q8C650;A0A1W2P866	A0A0R4J233;A0A1W2P6J7;Q8C650-2;Q8C650	Septin-10	Sept10
NaN	NaN	NaN	NaN	26.6765	27.0353	26.8395	26.4843	+	2	2	2	1.1	1.1	1.1	289.23	0	3.022	1280000000	3	F8WIE5;Q69ZR2	F8WIE5;Q69ZR2	E3 ubiquitin-protein ligase HECTD1	Hectd1
NaN	NaN	NaN	NaN	NaN	24.3673	24.4066	24.5216		2	2	2	3.7	3.7	3.7	87.194	0	2.8279	212500000	2	Q9QYC7;A0A0U1RPT2	Q9QYC7;A0A0U1RPT2	Vitamin K-dependent gamma-carboxylase	Ggcx
NaN	NaN	NaN	NaN	NaN	24.5032	25.1	24.754		2	2	2	12.7	12.7	12.7	30.69	0	2.7298	257480000	2	F6YCJ0;A2A5R2	F6YCJ0;A2A5R2	Brefeldin A-inhibited guanine nucleotide-exchange protein 2	Arfgef2
NaN	NaN	NaN	NaN	25.9049	24.9157	25.232	24.8701	+	1	1	1	0.9	0.9	0.9	291.99	0.0010194	2.6556	423380000	5	E9PUQ9;F7AC58;E2JF22	E9PUQ9;F7AC58;E2JF22	Piezo-type mechanosensitive ion channel component;Piezo-type mechanosensitive ion channel component 1	Piezo1
NaN	NaN	NaN	NaN	25.0508	24.5054	24.8891	NaN		2	2	2	23.5	23.5	23.5	22.086	0.0010152	2.6195	292180000	4	Q91XV3	Q91XV3	Brain acid soluble protein 1	Basp1
NaN	NaN	NaN	NaN	23.9971	NaN	25.1071	24.1998		2	2	2	9.2	9.2	9.2	21.607	0.001519	2.5959	225720000	3	Q921W0	Q921W0	Charged multivesicular body protein 1a	Chmp1a
NaN	NaN	NaN	NaN	NaN	23.6072	23.9022	23.7298		2	2	2	9.3	9.3	9.3	36.365	0.0015159	2.5852	169830000	2	Q9ERI6	Q9ERI6	Retinol dehydrogenase 14	Rdh14
NaN	NaN	NaN	NaN	22.9634	22.5671	23.4171	NaN		2	2	2	4.3	4.3	4.3	46.2	0.0024789	2.4218	80269000	2	E9QNW6;Q8VDG7	E9QNW6;Q8VDG7	Platelet-activating factor acetylhydrolase 2, cytoplasmic	Pafah2
NaN	NaN	NaN	NaN	24.8997	24.6982	24.6339	24.5055	+	3	2	2	16.6	11.2	11.2	22.576	0.0034534	2.3866	272250000	2	P43276	P43276	Histone H1.5	Hist1h1b
NaN	NaN	NaN	NaN	NaN	24.1564	24.5516	24.5265		2	2	2	7.9	7.9	7.9	60.299	0.0034063	2.25	170440000	3	J3QPB5;Q8VCB1	J3QPB5;Q8VCB1	Nucleoporin NDC1	Ndc1
NaN	NaN	NaN	NaN	24.2796	24.3875	24.1357	NaN		2	2	2	5.6	5.6	5.6	53.645	0.0066603	2.0248	185810000	2	Q99KR8	Q99KR8	Plasma alpha-L-fucosidase	Fuca2
NaN	NaN	23.9898	NaN	26.732	24.0535	24.0354	NaN		2	2	2	22.3	22.3	22.3	15.951	0	7.87	457500000	3	H3BK59;H9H9R4;Q9JHJ3	H3BK59;H9H9R4;Q9JHJ3	Glycosylated lysosomal membrane protein	Glmp
NaN	NaN	24.2601	NaN	25.0806	24.6761	24.5546	24.6918		4	3	3	3.3	2.8	2.8	153.54	0	18.385	357990000	9	F8VQL0;P16056;F6X333	F8VQL0;P16056	Receptor protein-tyrosine kinase;Hepatocyte growth factor receptor	Met
24.527	NaN	NaN	NaN	25.1906	24.6048	24.5781	NaN		3	3	3	15	15	15	27.396	0	7.2744	270150000	5	D3Z0E6;Q9Z0S1;A0A1B0GRV0	D3Z0E6;Q9Z0S1;A0A1B0GRV0	3(2),5-bisphosphate nucleotidase 1	Bpnt1
24.6182	NaN	NaN	NaN	24.7894	25.5749	24.7186	NaN		3	3	3	11	11	11	39.776	0	13.127	366300000	4	Q9D880	Q9D880	Mitochondrial import inner membrane translocase subunit TIM50	Timm50
NaN	NaN	24.631	NaN	27.3385	27.3382	27.0465	26.5524		5	5	5	22.3	22.3	22.3	29.174	0	16.582	1495500000	7	O70152;A2BDX2;F8WII3	O70152;A2BDX2	Dolichol-phosphate mannosyltransferase subunit 1	Dpm1
24.8439	NaN	NaN	NaN	25.4935	24.8675	24.8649	24.9366		3	3	3	12.5	12.5	12.5	37.817	0	8.0399	396040000	7	Q9ER41;F6ZDX6;F6VK94;D6REF0	Q9ER41	Torsin-1B	Tor1b
25.1163	NaN	NaN	NaN	25.5854	25.1726	24.7342	24.7266		6	5	5	2.2	2	2	429.1	0	17.255	453120000	8	S4R2F3;Q8C8R3;Q8C8R3-2;Q8C8R3-4;S4R2R5;Q8C8R3-5;S4R1J9;S4R2T7;Q8C8R3-3;S4R1I1;S4R2D6;S4R236;A0A1W2P812;S4R1S2;G5E8K2;G5E8K3;S4R2S8;S4R2K9;Q8C8R3-8;Q8C8R3-7;Q8C8R3-6;G5E8K5-2;G5E8K5-3;G5E8K5	S4R2F3;Q8C8R3;Q8C8R3-2;Q8C8R3-4;S4R2R5;Q8C8R3-5;S4R1J9;S4R2T7	Ankyrin-2	Ank2
25.1697	NaN	NaN	NaN	25.9209	26.0121	27.0103	25.6958		11	11	11	25.3	25.3	25.3	65.052	0	25.853	965410000	19	P97390	P97390	Vacuolar protein sorting-associated protein 45	Vps45
25.1877	NaN	NaN	NaN	24.5082	24.5587	24.6886	24.733		4	4	4	4.8	4.8	4.8	103.96	0	8.3589	340450000	6	Q9D4H1	Q9D4H1	Exocyst complex component 2	Exoc2
NaN	NaN	25.1938	NaN	25.0664	25.8528	25.2422	25.1588		5	5	5	7.7	7.7	7.7	110.54	0	9.9854	547360000	7	O35382;Q8C391;Q9CXE1	O35382;Q8C391	Exocyst complex component 4	Exoc4
25.2159	NaN	NaN	NaN	25.0077	24.4878	24.7257	NaN		2	2	2	2.6	2.6	2.6	114.41	0	4.2235	297750000	3	B8JK39;E9QAP0	B8JK39;E9QAP0	Integrin alpha-9	Itga9
NaN	25.22	NaN	NaN	25.9252	26.8108	26.0906	26.2749		3	3	3	34.6	34.6	34.6	11.692	0	9.134	1203100000	10	Q9CQZ6	Q9CQZ6	NADH dehydrogenase [ubiquinone] 1 beta subcomplex subunit 3	Ndufb3
25.2592	NaN	NaN	NaN	25.4167	24.985	24.7068	25.2521		4	4	4	7.7	7.7	7.7	78.301	0	12.487	439670000	10	Q9DBM2	Q9DBM2	Peroxisomal bifunctional enzyme;Enoyl-CoA hydratase/3,2-trans-enoyl-CoA isomerase;3-hydroxyacyl-CoA dehydrogenase	Ehhadh
NaN	NaN	25.2805	NaN	27.517	27.5374	27.2048	27.5889		4	4	4	50.9	50.9	50.9	13.02	0	26.972	1950700000	14	P52503;A0A1Y7VM38;A0A1Y7VKP8	P52503;A0A1Y7VM38;A0A1Y7VKP8	NADH dehydrogenase [ubiquinone] iron-sulfur protein 6, mitochondrial	Ndufs6
25.3331	NaN	NaN	NaN	25.1843	24.894	25.084	25.9097		5	5	5	26.3	26.3	26.3	24.936	0	13.024	596480000	8	Q9D8B3	Q9D8B3	Charged multivesicular body protein 4b	Chmp4b
NaN	NaN	NaN	25.3362	24.6155	24.8431	25.4631	25.0006		3	3	3	14.9	14.9	14.9	29.343	0	30.811	520530000	5	Q3UGC7;Q66JS6	Q3UGC7;Q66JS6	Eukaryotic translation initiation factor 3 subunit J-A;Eukaryotic translation initiation factor 3 subunit J-B	Eif3j1;Eif3j2
NaN	NaN	25.3939	NaN	25.5814	25.4176	25.3819	NaN		5	5	5	4	4	4	233.32	0	9.0097	530480000	8	E9Q390;A0A286YDF5;Q69ZN7;Q69ZN7-4;A0A286YCZ3;Q69ZN7-3;Q69ZN7-2	E9Q390;A0A286YDF5;Q69ZN7;Q69ZN7-4;A0A286YCZ3	Myoferlin	Myof
NaN	NaN	25.3944	NaN	25.0928	24.6749	25.1559	24.951		3	3	3	5.2	5.2	5.2	100.1	0	13.157	459140000	9	Q5DTK1	Q5DTK1	Chondroitin sulfate synthase 3	Chsy3
25.4004	NaN	NaN	NaN	25.5294	25.38	25.4391	25.4668		5	5	5	13.5	13.5	13.5	59.195	0	34.586	605330000	7	Q5SPX8;P58802	Q5SPX8;P58802	TBC1 domain family member 10A	Tbc1d10a
NaN	NaN	25.4238	NaN	25.3807	26.531	26.9607	25.9611		11	11	11	5.1	5.1	5.1	425.32	0	44.718	1067000000	19	G5E8Q0;P97412;P97412-2	G5E8Q0;P97412	Lysosomal-trafficking regulator	Lyst
25.4393	NaN	NaN	NaN	25.3691	24.9593	25.3999	25.0246		6	6	6	10.9	10.9	10.9	75.673	0	10.221	505570000	7	Q9D0I9	Q9D0I9	Arginine--tRNA ligase, cytoplasmic	Rars
NaN	25.4473	NaN	NaN	27.0881	26.7493	27.869	27.1123		13	13	13	20.8	20.8	20.8	136.08	0	75.525	1756300000	17	Q6PGL7-2;Q6PGL7;A0A0N4SV74;A0A0N4SUJ0	Q6PGL7-2;Q6PGL7;A0A0N4SV74;A0A0N4SUJ0	WASH complex subunit FAM21	Fam21
25.4543	NaN	NaN	NaN	25.9673	26.2962	25.6252	26.295		6	6	6	11.8	11.8	11.8	66.741	0	10.429	882870000	14	Q925I1;Q925I1-2;V9GWS5;H3BKI6;H3BK90	Q925I1;Q925I1-2	ATPase family AAA domain-containing protein 3	Atad3
NaN	25.4927	NaN	NaN	25.9114	25.7745	25.9399	25.809		4	4	4	25.5	25.5	25.5	23.415	0	19.773	809780000	10	P0C0A3;B1AZ42;B1AZ41	P0C0A3;B1AZ42	Charged multivesicular body protein 6	Chmp6
NaN	NaN	25.5327	NaN	NaN	24.7094	24.9776	25.0112		4	4	4	28	28	28	19.327	0	10.814	361020000	5	Q6PGB6-2;Q6PGB6;Q6PGB6-4;Q6PGB6-3;Q6PGB6-5	Q6PGB6-2;Q6PGB6;Q6PGB6-4;Q6PGB6-3;Q6PGB6-5	N-alpha-acetyltransferase 50	Naa50
NaN	25.5399	NaN	NaN	24.9349	25.058	25.3873	NaN		3	3	3	13.4	13.4	13.4	20.978	0	7.5861	447360000	4	Q9Z0Y1;E9Q919	Q9Z0Y1;E9Q919	Dynactin subunit 3	Dctn3
NaN	NaN	25.5548	NaN	24.8401	25.3645	25.7868	25.8958		7	5	5	9	7.7	7.7	98.652	0	10.228	685690000	9	G3X957;O35711-2;O35711;O35711-4	G3X957;O35711-2;O35711;O35711-4	Liprin-beta-2	Ppfibp2
NaN	NaN	25.5588	NaN	24.2386	25.1457	25.5613	24.5359		3	3	3	16.2	16.2	16.2	32.97	0	8.999	482000000	6	O35075;A0A338P6T5	O35075	Down syndrome critical region protein 3 homolog	Dscr3
25.5718	NaN	NaN	NaN	NaN	25.7476	26.0015	26.0728		5	5	5	32.4	32.4	32.4	35.608	0	54.414	778840000	11	P63330;P62715	P63330;P62715	Serine/threonine-protein phosphatase 2A catalytic subunit alpha isoform;Serine/threonine-protein phosphatase 2A catalytic subunit beta isoform	Ppp2ca;Ppp2cb
25.5847	NaN	NaN	NaN	26.5511	25.9902	25.5399	26.2644		5	5	5	22.2	22.2	22.2	34.238	0	24.96	872800000	7	P38060;V9GXD2;V9GWZ9;D3YVU9;Q8JZS7	P38060	Hydroxymethylglutaryl-CoA lyase, mitochondrial	Hmgcl
25.5869	NaN	NaN	NaN	24.923	25.1453	24.5416	24.7273		4	4	4	18.4	18.4	18.4	23.914	0	6.4015	432250000	7	P97930;P97930-2;D3Z3R3	P97930;P97930-2	Thymidylate kinase	Dtymk
25.6435	NaN	NaN	NaN	26.831	27.0482	27.9182	26.9944		14	14	13	18.9	18.9	17.7	107.72	0	30.948	1785400000	19	Q91W86;A0A1L1SRH3;A0A1L1SQ62	Q91W86	Vacuolar protein sorting-associated protein 11 homolog	Vps11
25.6669	NaN	NaN	NaN	25.4954	25.3848	25.0036	25.3682		4	4	4	13.4	13.4	13.4	42.123	0	7.8494	534620000	6	A0A0R4J1B9;G3X9M0;Q9ER88-2;Q9ER88;G3UWZ6;G3UYM6;G3UWR5;G3UWJ4;G3UZC0;G3UWM7	A0A0R4J1B9;G3X9M0;Q9ER88-2;Q9ER88;G3UWZ6;G3UYM6;G3UWR5;G3UWJ4;G3UZC0;G3UWM7	28S ribosomal protein S29, mitochondrial	Dap3
NaN	NaN	25.702	NaN	25.5811	25.9498	25.7437	25.7132		7	7	7	13	13	13	83.967	0	12.892	708090000	7	O35598;E9PYF2;D3Z1E6	O35598;E9PYF2	Disintegrin and metalloproteinase domain-containing protein 10	Adam10
NaN	25.7169	NaN	NaN	25.404	26.1684	26.8753	27.0864		3	3	3	72.9	72.9	72.9	9.1175	0	142.26	1111400000	7	P61961;H7BWZ1;D3YW97	P61961;H7BWZ1;D3YW97	Ubiquitin-fold modifier 1	Ufm1
25.7719	NaN	NaN	NaN	26.8162	26.715	27.2714	26.7208		4	4	4	4.6	4.6	4.6	93.314	0	17.255	1499200000	11	A0A0R4J0D3;Q3TDQ1	A0A0R4J0D3;Q3TDQ1	Dolichyl-diphosphooligosaccharide--protein glycosyltransferase subunit STT3B	Stt3b
25.7775	NaN	NaN	NaN	25.5095	24.2853	24.2763	NaN		5	5	5	1.6	1.6	1.6	469.02	0	15.345	266880000	5	B1B0C7;E9PZ16;Q05793	B1B0C7;E9PZ16;Q05793	Basement membrane-specific heparan sulfate proteoglycan core protein;Endorepellin;LG3 peptide	Hspg2
NaN	25.8131	NaN	NaN	25.4377	26.9822	27.5125	26.9614		6	6	6	13.4	13.4	13.4	68.839	0	21.878	1514900000	14	Q8BGD9;B2RWE8	Q8BGD9;B2RWE8	Eukaryotic translation initiation factor 4B	Eif4b
25.8159	NaN	NaN	NaN	26.9675	25.6939	27.4904	25.7901		12	12	12	28.6	28.6	28.6	65.445	0	37.564	1357900000	18	P48678-2;P48678;P48678-3;D3YUF7	P48678-2;P48678;P48678-3	Prelamin-A/C;Lamin-A/C	Lmna
25.8548	NaN	NaN	NaN	25.5142	25.2309	24.7429	NaN		5	5	5	30.6	30.6	30.6	28.062	0	24.649	564650000	3	Q80X85	Q80X85	28S ribosomal protein S7, mitochondrial	Mrps7
NaN	NaN	25.8567	NaN	26.4056	26.1889	26.178	26.4691		7	7	7	18.5	18.5	18.5	66.357	0	11.336	1014800000	8	Q64324;F8WGM5;A0A140LJH9;A0A140LHM1;A0A140LJ60	Q64324;F8WGM5	Syntaxin-binding protein 2	Stxbp2
NaN	NaN	NaN	25.8693	26.3956	29.6911	25.7221	26.4911		12	2	2	8.8	1.9	1.9	62.844	0	4.789	5624900000	4	Q3UV17	Q3UV17	Keratin, type II cytoskeletal 2 oral	Krt76
NaN	25.9205	NaN	NaN	26.3954	26.3845	26.0435	26.5469		2	2	2	18.1	18.1	18.1	11.725	0	11.856	1015100000	6	Q9CZY3-2;Q9CZY3;B2KF55;A6X925;B7ZBY7;E9PY39;Q9D2M8-2;Q9D2M8	Q9CZY3-2;Q9CZY3;B2KF55;A6X925;B7ZBY7;E9PY39;Q9D2M8-2;Q9D2M8	Ubiquitin-conjugating enzyme E2 variant 1;Ubiquitin-conjugating enzyme E2 variant 2	Ube2v1;Ube2v2;Gm20431
NaN	NaN	25.9443	NaN	25.7581	27.5866	28.2436	26.7904		16	16	14	32.4	32.4	28.7	63.915	0	143.41	2191200000	27	A0A0G2JEP0;Q61584-4;Q61584-7;Q61584-3;Q61584;Q61584-2;Q61584-5;Q61584-6;A0A0H2UH27;A0A0G2JGL6;A0A0G2JGH0	A0A0G2JEP0;Q61584-4;Q61584-7;Q61584-3;Q61584;Q61584-2;Q61584-5;Q61584-6;A0A0H2UH27	Fragile X mental retardation syndrome-related protein 1	Fxr1
25.9788	NaN	NaN	NaN	25.9874	26.1875	25.9219	26.0865		5	5	5	7.4	7.4	7.4	83.14	0	17.407	820050000	11	Q8BLN5	Q8BLN5	Lanosterol synthase	Lss
NaN	NaN	25.9998	NaN	25.9693	25.7037	25.5704	26.0537		6	6	6	10	10	10	100.81	0	16.213	797860000	11	Q9D2V7	Q9D2V7	Coronin-7	Coro7
NaN	NaN	26.011	NaN	25.9361	26.1468	26.2265	26.4026		8	8	8	15.6	15.6	15.6	72.322	0	44.41	966590000	14	Q8BRF7;Q8BRF7-3;A0A1W2P6R7;Q8BRF7-2	Q8BRF7;Q8BRF7-3	Sec1 family domain-containing protein 1	Scfd1
NaN	NaN	26.0289	NaN	25.7949	25.9717	26.4289	25.8222		6	6	6	9.3	9.3	9.3	85.73	0	21.78	948930000	13	Q62351;Q8C872	Q62351;Q8C872	Transferrin receptor protein 1	Tfrc
NaN	NaN	26.0379	NaN	25.7638	27.6014	26.7988	NaN		3	3	3	31.2	31.2	31.2	9.9583	0	13.555	1366900000	4	Q9CQS8;E9PW43	Q9CQS8	Protein transport protein Sec61 subunit beta	Sec61b
26.0404	NaN	NaN	NaN	27.4341	27.2976	26.7617	26.6718		6	6	6	47.1	47.1	47.1	15.183	0	21.253	1513600000	15	Q9CQR4	Q9CQR4	Acyl-coenzyme A thioesterase 13;Acyl-coenzyme A thioesterase 13, N-terminally processed	Acot13
26.0477	NaN	NaN	NaN	NaN	25.0472	25.022	25.3102		2	2	2	13.2	13.2	13.2	25.172	0	78.794	496080000	8	Q8R0F8	Q8R0F8	Acylpyruvase FAHD1, mitochondrial	Fahd1
NaN	NaN	26.0486	NaN	26.9817	26.9646	27.1152	26.7781		9	9	9	12.5	12.5	12.5	117.81	0	169.22	1547500000	17	Q02053;P31254	Q02053	Ubiquitin-like modifier-activating enzyme 1	Uba1
26.0548	NaN	NaN	NaN	25.5806	25.0021	24.5598	NaN		4	4	4	1.1	1.1	1.1	504.77	0	7.6436	382130000	6	A0A0R4J0I9;Q91ZX7	A0A0R4J0I9;Q91ZX7	Prolow-density lipoprotein receptor-related protein 1;Low-density lipoprotein receptor-related protein 1 85 kDa subunit;Low-density lipoprotein receptor-related protein 1 515 kDa subunit;Low-density lipoprotein receptor-related protein 1 intracellular domain	Lrp1
26.0615	NaN	NaN	NaN	26.6777	25.8513	25.5025	25.7742		4	4	2	23	23	14.2	36.061	0	10.833	786230000	6	A0A1B0GRP7;Q9Z2Y8;A0A1B0GQY5;A0A1B0GRR5;Q6P8V7;A0A1B0GSP5;Q80ZV3	A0A1B0GRP7;Q9Z2Y8;A0A1B0GQY5;A0A1B0GRR5;Q6P8V7	Proline synthase co-transcribed bacterial homolog protein	Prosc
26.0922	NaN	NaN	NaN	NaN	25.2337	25.836	25.6022		4	4	4	16.6	16.6	16.6	32.46	0	7.7894	704880000	5	O88569-3;O88569-2;O88569;A0A0N4SUM2	O88569-3;O88569-2;O88569;A0A0N4SUM2	Heterogeneous nuclear ribonucleoproteins A2/B1	Hnrnpa2b1
26.1213	NaN	NaN	NaN	25.9342	26.5504	25.8063	25.8322		5	5	5	12.7	12.7	12.7	53.246	0	32.77	916020000	11	P53395;A0A0G2JGU0	P53395	Lipoamide acyltransferase component of branched-chain alpha-keto acid dehydrogenase complex, mitochondrial	Dbt
26.1576	NaN	NaN	NaN	26.2946	25.5031	25.4766	25.6411		6	6	6	16.6	16.6	16.6	58.408	0	60.682	807140000	14	Q99MN9;E9Q1J7;D3YZC1;A0A087WQV1	Q99MN9;E9Q1J7	Propionyl-CoA carboxylase beta chain, mitochondrial	Pccb
NaN	NaN	NaN	26.1599	25.8149	26.9773	27.7012	26.479		11	11	11	25.2	25.2	25.2	66.612	0	48.816	1700600000	17	Q8QZY1	Q8QZY1	Eukaryotic translation initiation factor 3 subunit L	Eif3l
NaN	NaN	26.2341	NaN	27.9154	29.1337	29.2519	28.5945		11	11	11	43.5	43.5	43.5	38.028	0	95.479	5363600000	38	Q8K021;Q3TSA8;D3YTP4	Q8K021;Q3TSA8;D3YTP4	Secretory carrier-associated membrane protein 1	Scamp1
NaN	NaN	26.2441	NaN	26.5119	26.4139	26.5733	26.5068		6	6	6	18.4	18.4	18.4	60.606	0	18.043	1222100000	16	P11344;A0A140LIB9	P11344	Tyrosinase	Tyr
26.262	NaN	NaN	NaN	27.0541	26.2294	26.2476	26.5576		4	4	4	17	17	17	32.745	0	7.7159	1099000000	6	D3Z494;G5E895;S4R2G9;P45377	D3Z494;G5E895;S4R2G9		Akr1b10
NaN	NaN	26.2625	NaN	25.9843	27.377	28.031	26.7361		14	14	14	19.8	19.8	19.8	102.1	0	30.54	1915900000	15	Q62448;G3XA17;Q62448-2;F7CBP1;F6TW20;F7DAB1	Q62448;G3XA17;Q62448-2;F7CBP1	Eukaryotic translation initiation factor 4 gamma 2	Eif4g2
NaN	NaN	26.3077	NaN	26.2224	25.7545	25.7754	25.9936		5	5	5	20.1	20.1	20.1	41.614	0	30.379	792980000	10	Q9Z0P4;Q3UZP7;Q9Z0P4-2;A0A1W2P831	Q9Z0P4;Q3UZP7;Q9Z0P4-2	Paralemmin-1	Palm
NaN	NaN	26.3192	NaN	26.2513	26.3489	26.734	26.2854		3	3	3	44.9	44.9	44.9	13.274	0	9.1477	1150500000	6	O35623	O35623	BET1 homolog	Bet1
NaN	26.3371	NaN	NaN	26.3694	26.3163	25.7565	26.0826		7	7	7	20	20	20	47.006	0	66.948	945750000	14	Q9DCL9;D3Z6P1;D6RCU8	Q9DCL9	Multifunctional protein ADE2;Phosphoribosylaminoimidazole-succinocarboxamide synthase;Phosphoribosylaminoimidazole carboxylase	Paics
NaN	NaN	26.3537	NaN	25.9178	26.2076	26.0284	25.3474		5	5	5	19.7	19.7	19.7	38.219	0	63.74	910420000	10	Q9CYA0	Q9CYA0	Cysteine-rich with EGF-like domain protein 2	Creld2
NaN	26.3541	NaN	NaN	27.3092	26.3776	26.9321	NaN		7	7	7	18.1	18.1	18.1	60.452	0	16.701	1254000000	11	Q8VCQ8;E9QA16;S4R1T7;E9Q0M9;D3Z6I7;E9QA15;E9Q9F3;F6QLP8;F6RGN9;F6ZAW1;F6T2Z7	Q8VCQ8;E9QA16;S4R1T7;E9Q0M9;D3Z6I7;E9QA15		Cald1
26.3544	NaN	NaN	NaN	26.437	26.6308	26.768	26.4243		12	12	12	11	11	11	170.08	0	23.754	1237100000	14	Q8CGC7	Q8CGC7	Bifunctional glutamate/proline--tRNA ligase;Glutamate--tRNA ligase;Proline--tRNA ligase	Eprs
26.3952	NaN	NaN	NaN	26.8284	26.8206	26.3052	26.5242		5	5	5	13.1	13.1	13.1	68.721	0	31.156	1244800000	12	Q8JZN5;A0A0G2JDY4	Q8JZN5;A0A0G2JDY4	Acyl-CoA dehydrogenase family member 9, mitochondrial	Acad9
26.4227	NaN	NaN	NaN	26.5773	27.4008	27.1519	26.6717		14	5	5	48.9	21	21	42.613	0	43.843	1797300000	12	P61164;A0A494BB86	P61164;A0A494BB86	Alpha-centractin	Actr1a
26.4293	NaN	NaN	NaN	27.0427	25.6995	27.0325	26.4383		7	7	7	34.5	34.5	34.5	38.822	0	39.765	1233700000	11	O54984;A0A1B0GRE1	O54984	ATPase Asna1	Asna1
NaN	26.4367	NaN	NaN	23.0738	23.834	23.2073	25.4165		3	3	3	14.4	14.4	14.4	25.766	0	6.726	486420000	9	O35963;A0A0A6YY00;P97950	O35963	Ras-related protein Rab-33B	Rab33b
26.4517	NaN	NaN	NaN	26.1764	26.4093	25.8022	25.2529		2	2	2	27.7	27.7	27.7	9.2908	0	3.4009	1181500000	3	P48771	P48771	Cytochrome c oxidase subunit 7A2, mitochondrial	Cox7a2
NaN	NaN	26.4576	NaN	NaN	26.6017	26.7941	26.1148		5	5	5	24.2	24.2	24.2	36.169	0	15.858	1072800000	8	P70372	P70372	ELAV-like protein 1	Elavl1
NaN	26.4708	NaN	NaN	26.8309	26.8706	26.8037	26.5516		8	8	8	45	45	45	24.967	0	103.58	1387200000	13	P70280	P70280	Vesicle-associated membrane protein 7	Vamp7
NaN	NaN	26.4923	NaN	26.924	27.772	28.1054	27.3516		14	14	14	18.3	18.3	18.3	135.08	0	134.37	2406000000	26	O54774;A0A1W2P6Q6	O54774	AP-3 complex subunit delta-1	Ap3d1
NaN	NaN	26.4937	NaN	25.9439	25.575	26.0082	26.0479		6	6	6	14.1	14.1	14.1	59.533	0	38.566	962970000	10	Q3UHD6-2;Q3UHD6;A0A0G2JF85;A0A0G2JGD5;A0A0G2JG07	Q3UHD6-2;Q3UHD6;A0A0G2JF85	Sorting nexin-27	Snx27
26.51	NaN	NaN	NaN	27.1156	26.6574	27.3921	27.0788		11	11	11	26.9	26.9	26.9	62.581	0	22.506	1653100000	14	Q60864	Q60864	Stress-induced-phosphoprotein 1	Stip1
26.5319	NaN	NaN	NaN	25.6734	NaN	23.789	24.4992		7	7	7	31.6	31.6	31.6	40.342	0	18.988	550110000	8	Q9DCS3;A2A845	Q9DCS3	Trans-2-enoyl-CoA reductase, mitochondrial	Mecr
26.5517	NaN	NaN	NaN	26.1808	26.2844	26.8263	26.6238		4	4	4	41.2	41.2	41.2	18.566	0	39.591	1227300000	6	P60605;G3UZX2;G3UYT0	P60605;G3UZX2	Ubiquitin-conjugating enzyme E2 G2	Ube2g2
26.5748	NaN	NaN	NaN	27.392	26.732	27.2902	26.7846		7	7	7	33.3	33.3	33.3	38.113	0	137.22	1623800000	16	P40336;P40336-2;A0A1W2P7Z9;A0A1W2P7R7	P40336;P40336-2	Vacuolar protein sorting-associated protein 26A	Vps26a
NaN	26.5888	NaN	NaN	26.51	28.7244	28.2665	28.5815		20	20	20	35.1	35.1	35.1	82.499	0	95.705	3737300000	31	Q91VR5;A0A1Y7VM48	Q91VR5	ATP-dependent RNA helicase DDX1	Ddx1
NaN	NaN	26.615	NaN	26.2819	26.1196	26.9044	NaN		4	4	4	74.2	74.2	74.2	10.051	0	14.95	1000200000	7	P14069	P14069	Protein S100-A6	S100a6
26.6295	NaN	NaN	NaN	25.852	25.8711	26.4864	NaN		3	3	3	24.4	24.4	24.4	15.242	0	38.559	1178300000	5	Q9CQB5;D3Z3X4	Q9CQB5;D3Z3X4	CDGSH iron-sulfur domain-containing protein 2	Cisd2
NaN	NaN	26.6351	NaN	26.3127	25.1129	25.7948	25.4221		7	7	7	21.3	21.3	21.3	41.704	0	26.425	874460000	10	O09174	O09174	Alpha-methylacyl-CoA racemase	Amacr
26.6433	NaN	NaN	NaN	27.1494	27.2121	26.7234	25.7589		6	6	6	49.2	49.2	49.2	21.984	0	14.942	1401200000	15	Q9CQJ8	Q9CQJ8	NADH dehydrogenase [ubiquinone] 1 beta subcomplex subunit 9	Ndufb9
26.6691	NaN	NaN	NaN	26.7958	26.6203	26.4175	26.6559		8	8	8	25.5	25.5	25.5	39.366	0	25.54	1346800000	14	D3Z4B2;Q9CWZ7;A0A494BA20;A0A494BAE3;A0A494BA49;A0A494BAX2;A0A494BBF5	D3Z4B2;Q9CWZ7;A0A494BA20;A0A494BAE3	Gamma-soluble NSF attachment protein	Napg
26.6742	NaN	NaN	NaN	27.1851	26.834	27.376	27.5621		10	10	4	36	36	19.4	43.952	0	68.572	1906000000	25	A2AD84;Q99JT2	A2AD84;Q99JT2	Serine/threonine-protein kinase 26	Stk26
26.7037	NaN	NaN	NaN	26.245	26.2119	25.7423	25.5441		4	4	4	18.2	18.2	18.2	33.338	0	11.409	899430000	8	A0A0R4J023;Q9JLZ3;F6RT60;F6R307	A0A0R4J023;Q9JLZ3;F6RT60;F6R307	Methylglutaconyl-CoA hydratase, mitochondrial	Auh
26.7589	NaN	NaN	NaN	27.6433	26.4993	26.7416	26.6992		7	7	6	26.2	26.2	24	40.466	0	46.316	1496900000	13	P49813	P49813	Tropomodulin-1	Tmod1
NaN	NaN	26.7727	NaN	27.013	27.0044	27.1207	26.7407		10	10	10	35.1	35.1	35.1	46.67	0	56.56	1705700000	18	P63005;P63005-2	P63005;P63005-2	Platelet-activating factor acetylhydrolase IB subunit alpha	Pafah1b1
NaN	NaN	26.8352	NaN	25.7585	24.2694	NaN	24.1198		6	6	6	21.3	21.3	21.3	40.589	0	16.497	632390000	6	A0A1Y7VN19;Q9CXR1	A0A1Y7VN19;Q9CXR1	Dehydrogenase/reductase SDR family member 7	Dhrs7
NaN	26.8502	NaN	NaN	NaN	24.8326	25.1985	26.3516		5	5	5	17.4	17.4	17.4	44.868	0	10.627	742770000	5	P63037;B1AXY1;B1AXX9;B1AXY0	P63037	DnaJ homolog subfamily A member 1	Dnaja1
NaN	NaN	26.9069	NaN	26.7389	27.4698	27.401	27.4778		14	14	14	17.8	17.8	17.8	136.85	0	43.578	2057000000	25	E9Q586;E9Q3M3;O08788-2;O08788;D3YX34;D3Z2M9;D3YYG9	E9Q586;E9Q3M3;O08788-2;O08788;D3YX34	Dynactin subunit 1	Dctn1
NaN	26.948	NaN	NaN	25.495	26.5616	26.7208	26.3008		9	9	9	14.3	14.3	14.3	92.071	0	15.679	1230100000	11	E9Q5Q0;Q3TGG2;A0A0U1RPL0;Q7TQH0-3;Q7TQH0;Q7TQH0-2;J3QP59	E9Q5Q0;Q3TGG2;A0A0U1RPL0;Q7TQH0-3;Q7TQH0;Q7TQH0-2	Ataxin-2-like protein	Atxn2l
NaN	NaN	26.984	NaN	26.4999	26.3327	26.6378	26.8359		9	9	9	8.5	8.5	8.5	181.82	0	40.634	1357500000	18	P58871;Z4YJL4;A0A571BEG9	P58871;Z4YJL4	182 kDa tankyrase-1-binding protein	Tnks1bp1
26.9901	NaN	NaN	NaN	27.0884	26.5532	26.4882	26.6909		7	7	7	25.9	25.9	25.9	35.732	0	14.78	1410500000	14	P45376;D3YVJ7	P45376;D3YVJ7	Aldose reductase	Akr1b1;Akr1b3
27.0097	NaN	NaN	NaN	28.0768	28.1425	28.7414	27.9886		12	12	12	31.9	31.9	31.9	55.843	0	93.889	3655500000	36	Q9D024;Q9D024-2;F7C265;Q9D024-3;B1AR93	Q9D024;Q9D024-2;F7C265;Q9D024-3;B1AR93	Coiled-coil domain-containing protein 47	Ccdc47
NaN	27.0421	NaN	NaN	29.255	28.5354	28.9759	28.985		12	12	12	40.7	40.7	40.7	47.874	0	250.14	5361500000	35	Q9DBL1;E9Q5L3;A0A140LHL4	Q9DBL1;E9Q5L3	Short/branched chain specific acyl-CoA dehydrogenase, mitochondrial	Acadsb
27.0603	NaN	NaN	NaN	26.9484	26.6471	26.6516	27.1068		26	16	16	15.9	11.5	11.5	271.66	0	61.855	1613200000	25	E9PUM4;A0A1L1SQ51;Q71LX4;A0A1L1SRI1;Q8CDM9;A0A1L1SQP9	E9PUM4;A0A1L1SQ51;Q71LX4;A0A1L1SRI1;Q8CDM9	Talin-2	Tln2
27.0624	NaN	NaN	NaN	28.0393	26.9448	26.9686	25.6869		13	13	13	18.8	18.8	18.8	121.55	0	185.93	1852200000	23	Q3U7R1;Q3U7R1-2;A0A1W2P784	Q3U7R1;Q3U7R1-2;A0A1W2P784	Extended synaptotagmin-1	Esyt1
27.0715	NaN	NaN	NaN	28.8183	27.8957	28.8513	29.2034		6	6	6	70.4	70.4	70.4	13.48	0	205.07	4821400000	25	Q9JHS3;D3YTS4	Q9JHS3;D3YTS4	Ragulator complex protein LAMTOR2	Lamtor2
27.0745	NaN	NaN	NaN	28.3933	27.4986	27.0481	27.6185		12	12	12	30.7	30.7	30.7	82.843	0	174.31	2482700000	17	P16332;A0A3B2WCT0	P16332	Methylmalonyl-CoA mutase, mitochondrial	Mut
27.1022	NaN	NaN	NaN	26.7511	26.2577	26.2475	26.3509		9	9	9	19.9	19.9	19.9	73.98	0	29.963	1192400000	15	P52825;A2A8E8;A2A8E7	P52825	Carnitine O-palmitoyltransferase 2, mitochondrial	Cpt2
NaN	NaN	27.1026	NaN	27.9671	27.9686	28.8417	27.9903		8	8	8	13.7	13.7	13.7	91.868	0	27.156	3618400000	18	Q62052;D6RCY7;D3Z251;D6RIQ8;A0A0U1RP45	Q62052;D6RCY7;D3Z251;D6RIQ8	P protein	Oca2
27.141	NaN	NaN	NaN	29.6294	29.6555	29.1972	29.2197		7	7	7	55.3	55.3	55.3	11.424	0	74.93	7352300000	38	Q9CPQ8;J3QNM7	Q9CPQ8	ATP synthase subunit g, mitochondrial	Atp5l
[truncated: 884 more rows]

## Sheet: Hits overlap
Gene names	category
Sept10	Melan-c2
9030624J02Rik	Melan-c2
Aak1	Melan-c2
Abcf2	Melan-c2
Abcg2	Melan-c2
[truncated: 482 more rows]

## Sheet: Common hits_GOBP analysis
Enrichment FDR	nGenes	Pathway Genes	Fold Enrichment	Pathway	GO BP terms	Genes
[truncated: 120 more rows]
