# Supplementary material for: MFF budding from mitochondria regulates melanosome size and maturation
Source: Research Square preprint supplement (doi:10.21203/rs.3.rs-4545422/v1), 2024-07-03
Supplement: Supplementary file 2 [file 6ab0ce4190bfec14180bd47a.xlsx]

## Sheet: Sheet1
Table S3: statistically significant DEGs for the Mff-silenced cells vs. control
gene symbol	logFC	FDR
Mff	-3.6401	7.77e-06
Gng10	-1.92312	0.00169095
Cdh13	-1.41539	0.00169095
P4hb	-1.25436	0.00169095
Kpna2	-1.39937	0.00272561
Nceh1	-1.03535	0.00272561
Dusp3	-0.857992	0.00316574
Aebp1	1.41934	0.00316574
S100b	1.46674	0.00430587
Pdap1	-1.03052	0.00477737
Trappc2	-2.18161	0.00539568
NR_045518.1	-0.9828	0.00539568
Tspan3	-0.942677	0.00539568
Tcn2	0.86475	0.00539568
NR_030738.1	0.877306	0.00539568
Atp11a	-1.49651	0.00630381
Mapk3	0.685945	0.00630381
Ech1	0.731309	0.00630381
Fastk	0.793897	0.00630381
Tmco1	1.31434	0.00630381
Sparcl1	1.79691	0.00630381
L1cam	1.05271	0.0063833
Stat2	1.17682	0.0063833
Gabarap	0.650824	0.00738042
Cenpa	-2.1856	0.0077069
Gpr180	-1.97836	0.0077069
Six4	-1.54583	0.0077069
C1ql3	-1.53156	0.0077069
Slc35a1	-1.11382	0.0077069
Cadm1	-0.927321	0.0077069
Chmp1b	-0.917901	0.0077069
Fam53b	0.731392	0.0077069
Tpcn1	0.832436	0.0077069
Il2rb	2.57338	0.0077069
Pde1b	1.80803	0.00865105
Dennd1a	1.08533	0.00915171
Hnrnpa3	-0.667806	0.00921062
Spg21	0.677806	0.00921062
Qars	0.754504	0.00921062
Oxct1	0.86701	0.00921062
Ncam1	0.918358	0.00938572
Gpm6a	-0.665934	0.00940684
Wdfy1	0.627133	0.00940684
NR_149315.1	0.970992	0.00940684
XR_385969.5	1.14425	0.00940684
Ube2j1	0.635682	0.00945106
Mpzl1	-0.714125	0.00983379
S100a1	0.740594	0.010062
Nme4	1.54573	0.010062
Serpina3n	4.21369	0.010062
Pclaf	-2.63538	0.010134
Ctsb	0.674158	0.010134
Fam104a	0.508695	0.0106596
Fgfr2	-1.4968	0.0126558
Zdhhc16	-1.16537	0.0126558
Nuak1	-0.961804	0.0126558
Vps26c	0.719917	0.0126558
Tbc1d4	1.00176	0.0126558
Mt2	1.24679	0.0126558
Hbegf	-0.902252	0.0139156
Capg	1.21067	0.0139156
Camk1	0.553232	0.0153331
Rnh1	0.589946	0.0153331
Ifit3	0.943059	0.0153331
Cdkn1b	0.560647	0.0153351
Get1	-1.07029	0.0159143
Cbfb	-1.06196	0.0159143
Car6	1.01423	0.0160094
Sidt2	0.517575	0.0164876
C4b	1.1214	0.0173622
Plod1	0.605054	0.0179126
Vps13c	0.873232	0.0179126
Stat3	0.625789	0.0183802
Jcad	0.664599	0.0184691
Nrp1	-0.709555	0.018667
Epdr1	-0.675232	0.018667
Rufy3	0.913657	0.0188709
Ckb	-0.863245	0.019483
Sptbn1	0.523813	0.019483
Syne2	1.04736	0.019483
Oxa1l	0.681845	0.0202899
Ralgds	0.565896	0.0206738
Pdha1	-0.786619	0.0210275
Nop53	0.8541	0.0210275
XR_003953705.2	-1.15051	0.02133
Sipa1l1	-0.820109	0.02133
Prkar2b	-0.701623	0.02133
Acadm	-0.699788	0.02133
Washc5	0.532598	0.02133
Prkar2a	-0.751658	0.0217329
Prc1	-2.54808	0.0219023
Ndufa7	-2.02381	0.0219023
Epm2aip1	-0.683181	0.0219023
Cap1	0.465163	0.0219023
Plekhm2	0.50623	0.0219023
Dpp7	0.714773	0.0219023
Mrpl24	0.758619	0.0219023
NR_110993.1	1.41965	0.0219023
Sfpq	-0.541532	0.0226245
NR_138563.1	0.829163	0.0226245
Ephx1	0.915338	0.0226245
Zfp536	2.1636	0.0226245
Cybc1	0.953119	0.0229953
Lgi4	1.1972	0.0229953
Adgrl1	-0.691081	0.0233104
Cyp2j6	0.747615	0.0233104
Gpr137c	-1.59122	0.0234306
Zbtb7b	-1.29046	0.0234306
Hsp90b1	-0.814948	0.0234306
Serpine2	-0.54974	0.0234306
Large1	0.702758	0.0234306
Dnah7b	0.765464	0.0234306
Snrnp27	0.812329	0.0234306
Ccdc13	0.986333	0.0234306
Cdc20	-2.45521	0.0244303
Fubp3	-0.744089	0.024456
Sdf2l1	-0.921929	0.0245553
Sumf1	0.562497	0.0245553
Lgals3bp	0.578405	0.0245553
Rap2b	0.600173	0.0245553
Myo6	0.649141	0.0245553
Uqcrc2	0.701482	0.0245553
Siae	0.754727	0.0245553
Mpst	0.969155	0.0245553
Trpv2	1.2542	0.0245553
Tpx2	-2.07282	0.0250779
Mvp	0.633077	0.0250779
Tspan5	-0.863745	0.0250812
Irx3	-0.749418	0.0250864
Nav3	1.01658	0.0252703
Mt1	0.984236	0.0254347
Dbi	0.665631	0.0254988
Map6	0.6675	0.0254988
Senp2	-0.803375	0.0256672
Eps8	-0.591469	0.0256672
Slc18a1	4.05315	0.0260644
Tmem176a	0.508356	0.0267533
Kxd1	0.717472	0.0271022
NR_169103.1	1.58476	0.0271022
Fxyd3	2.48896	0.0271022
Pmm1	0.712772	0.0274891
Chtop	-0.466796	0.027631
Xpo4	-0.918502	0.0280183
Npr3	-1.57917	0.028082
Ect2	-1.45473	0.028082
Clip3	0.557498	0.028082
Dyrk2	0.657231	0.028082
Lage3	0.957448	0.028082
Ube2h	-0.491624	0.0283762
Lpcat2	0.717273	0.0283762
Gm10639	1.00513	0.0283907
Rpl3	0.504169	0.0284462
Myo18a	0.641586	0.028496
Pimreg	-2.8301	0.0289153
Nuf2	-2.36691	0.0289153
Ugcg	-0.814951	0.0289153
Scly	0.587297	0.0289153
Tbc1d2b	0.72061	0.0289153
Rfc1	0.829575	0.0289153
NR_028522.2	1.10388	0.0289153
Wfdc3	1.86547	0.0289153
Ppp1cb	-0.550148	0.0289462
Tmem170b	-1.49591	0.0295849
Rai14	-0.725257	0.0295849
Mapkapk2	-0.499301	0.0296918
Shc1	0.449151	0.0296918
Ndufa4	-1.16062	0.0298298
Hsd17b7	-0.880086	0.0303392
Parp3	0.74111	0.0304665
XR_877684.4	0.9882	0.0304665
Ifit3b	1.3067	0.0304665
Cdca8	-1.49103	0.0307717
Phb2	0.655938	0.0311223
Lipa	0.800681	0.0311223
Cntnap2	3.51106	0.0311223
Eny2	-0.565951	0.0311627
Ahnak2	0.457258	0.0311627
Ccnb2	-2.04147	0.0313238
Cbarp	-1.15848	0.0313808
Grsf1	-0.765233	0.0313808
Cbx6	-0.459232	0.0313808
NR_153402.1	0.635514	0.0313808
Ccdc9	0.892635	0.0313808
Atraid	0.489265	0.0314823
Myo5a	0.623482	0.0314823
Tmem87b	0.660046	0.0319127
Hmgcr	-0.609499	0.0322053
Phyhd1	0.824894	0.0322053
Fyb	1.18253	0.0322647
Slc4a8	0.610315	0.0323276
Plk1	-2.15154	0.0323611
Ankrd13a	0.906095	0.0330436
XR_873148.2	2.3118	0.0330436
Synj2bp	-9.52309	0.0332254
Ano6	-0.681024	0.0335062
Nr1i2	1.77546	0.0335104
Ice1	-0.96719	0.0337521
Flot2	0.543456	0.0341151
NR_169028.1	-0.783875	0.0347761
Bhlhe41	-0.590692	0.0348169
Ctsd	0.601863	0.0348169
Pbk	-2.32721	0.0361808
Mreg	-1.08257	0.0365262
Ap2a2	-0.571985	0.0365262
C2cd2l	-0.552603	0.0365262
Nav1	0.479343	0.0365262
Ap3d1	0.548674	0.0365262
Ube2e3	0.632422	0.0365262
Snrk	0.636376	0.0365262
Mphosph6	-0.823507	0.0371038
Rps18	0.518481	0.0372736
Tsc22d1	-0.496322	0.0380723
Scarb2	0.433792	0.0380723
Bod1	0.489159	0.0380723
Cic	0.49821	0.0380723
Atad2	-0.794264	0.0389322
XR_001781847.2	1.4821	0.0389322
Cfap410	0.70532	0.0390091
Top2a	-2.08047	0.0392513
Psen2	0.371471	0.0392513
Yap1	-0.643456	0.0395212
Slc22a17	0.59772	0.0396519
Capn2	0.486834	0.0404553
Il10rb	0.488085	0.0404761
Irx5	-0.631191	0.0411877
Gbp6	2.12628	0.0412674
Stard4	-0.83281	0.0412816
Hint2	0.511576	0.0414805
Psme1	0.439536	0.041926
Rpl10	0.535045	0.04196
Mfsd12	0.710632	0.04196
Eif3i	0.574984	0.0419842
Txlna	0.558483	0.042054
Sparc	-0.698986	0.0430091
Rap2a	-0.525832	0.0434545
Serpinb6a	0.673775	0.0435526
Got1	-0.613866	0.0436056
Stx16	-0.591382	0.0436056
Myh11	1.79193	0.0436056
Pdxp	-1.13123	0.0447831
Ube2c	-2.23374	0.0449816
Rrm2	-1.95871	0.0453842
Tmx1	0.487363	0.0453842
Gm3650	0.797212	0.0457541
Steap1	-2.1082	0.0459917
Plin2	0.59026	0.0459917
Ganc	0.919277	0.0460352
Fuca2	-0.585197	0.0460703
Mgll	0.633047	0.0460703
Tcf7l2	-0.67049	0.0463011
Aldh3a2	-0.749052	0.0464617
Acox1	0.519663	0.0464617
Anp32e	-0.411571	0.0474001
Magi1	-0.966874	0.0475799
Glyr1	-0.500364	0.0476939
H1f0	-0.449141	0.0476939
Lrrc8a	0.547213	0.0476939
Arl3	0.551146	0.0476939
Tmod1	0.555407	0.0476939
Atl1	0.846802	0.0476939
Rab7b	1.27722	0.0476939
H2-DMa	1.78698	0.0476939
Sec23a	-0.778844	0.0481402
Pip4k2b	-0.757073	0.0481402
Nicn1	0.78618	0.0481402
Ccnd1	-1.15646	0.0483929
Fuom	0.999796	0.0483929
Hs3st1	-1.45589	0.0484374
Eftud2	0.523754	0.0484374
Vamp5	0.692824	0.0484374
NR_029471.2	0.881014	0.0484374
Itga2	1.78737	0.0484374
Aldh3b1	0.715301	0.0487719
Trim30a	1.22359	0.0487719
Zfp146	-0.775476	0.0490786
Ppp1r18	0.671198	0.0490912
Impact	-0.620237	0.0493209
Tmpo	-0.58334	0.0493209
Tpp1	0.377018	0.0493209
Wdr91	1.01243	0.0493209
Smim10l1	-0.681565	0.0495786
Rfx7	-1.06736	0.0496887
Entpd4	-0.615692	0.0496887
Klhl24	-0.533044	0.0496887
Npnt	-0.520907	0.0496887
Trib1	-0.519092	0.0496887
Ccn4	-0.512883	0.0496887
Hadha	0.50447	0.0496887
Rab13	0.616065	0.0496887
