# Supplementary material for: MFF budding from mitochondria regulates melanosome size and maturation
Source: Research Square preprint supplement (doi:10.21203/rs.3.rs-4545422/v1), 2024-07-03
Supplement: Supplementary file 3 [file 994d83b1cbeee02b4ecc2096.xlsx]

## Sheet: DEGs Melan-c2 v Melan-a
Table S1: Staristically significant DEGs for the melsn-c2 vs. melan-a test. Columns reported are gene symbol, logarithm of Fold Change and FDR-corrected p-value
gene symbol	logFC	FDR
Cdkn2a	-6.1921	1.25e-11
Ddx3y	7.36502	1.25e-11
S100a11	9.2273	1.25e-11
Armcx2	9.22139	4.05e-11
Cd59a	6.25116	4.3e-11
Gnai1	6.55005	4.66e-11
Gjb2	5.1589	4.66e-11
Speg	-8.22959	5.07e-11
Serpine2	-6.03093	5.07e-11
Mrgprb1	7.09442	6.63e-11
Bfsp2	-4.84169	6.63e-11
Ptprf	-11.9852	6.63e-11
Sparcl1	7.74409	1.71e-10
Hs6st2	4.35137	2.09e-10
Casd1	3.51034	2.69e-10
Hpse	3.43185	2.69e-10
Phgdh	8.79264	3.16e-10
Col16a1	-4.64037	6e-10
Cyba	3.40778	6.12e-10
Adgrg1	-6.20779	6.34e-10
Tfpi	7.03757	7.39e-10
Ppargc1a	4.99707	7.39e-10
Slc6a15	5.4614	7.96e-10
Smarca1	5.44111	1.09e-09
Basp1	-2.64195	1.09e-09
Gpr37	3.52451	1.55e-09
Ccng1	3.34912	1.7e-09
Pianp	-3.06226	1.97e-09
Sod3	5.20724	2.27e-09
Mlana	2.64104	2.27e-09
Atp6v0d2	4.70255	2.49e-09
Wipf3	-2.98387	2.81e-09
Slc38a1	-2.42516	2.96e-09
Sox12	-4.50799	3.17e-09
Cox20	2.70732	3.31e-09
Mrs2	2.08589	3.31e-09
Cd109	7.48297	3.49e-09
Auts2	-6.14412	3.78e-09
Dynlt3	3.52671	3.8e-09
C1qtnf6	-7.51378	4.01e-09
Fmc1	2.73885	4.01e-09
Serpinf1	-4.03959	4.42e-09
Uqcrfs1	1.72458	4.52e-09
Gimap9	-4.82484	4.8e-09
Pyurf	2.29931	5.37e-09
Cox7b	2.91651	5.46e-09
Hoxb4	-6.57143	5.6e-09
Itgb5	-4.16824	5.6e-09
Klhl13	8.59862	6.44e-09
Snrpn	10.3588	6.81e-09
Epha4	3.29042	7.46e-09
Gm49353	4.25944	7.64e-09
Cdc42ep4	-7.89013	7.64e-09
Uqcrh	2.31273	7.64e-09
2310033P09Rik	3.57254	7.64e-09
Egfl7	-3.67986	8.15e-09
Mageh1	-4.21451	8.15e-09
Prkcz	-6.73545	8.62e-09
Emp1	5.60895	8.89e-09
Slc25a13	3.61154	8.89e-09
Gxylt2	2.03169	8.89e-09
Rims2	2.85139	9.44e-09
Stk26	5.99565	1.16e-08
Ecm1	-4.72947	1.26e-08
Osbpl6	2.41342	1.26e-08
Serpini1	6.15085	1.35e-08
Atp2b4	-2.11466	1.4e-08
Crem	2.34829	1.43e-08
Pth1r	-5.16364	1.43e-08
Tmem132a	-5.80712	1.44e-08
Cdh13	-5.7193	1.47e-08
Gpsm3	-3.50672	1.47e-08
Mrpl42	1.93072	1.55e-08
Galk1	10.5035	1.55e-08
Grap	-4.75581	1.6e-08
Itga4	4.8338	1.6e-08
Skap2	1.88293	1.6e-08
Tvp23a	-7.97789	1.6e-08
Col4a1	2.95567	1.6e-08
Tspan13	6.08156	1.61e-08
Nol4l	-3.04418	1.69e-08
Zrsr1	7.04014	1.88e-08
Trim25	-6.84314	1.97e-08
Notch1	-6.65266	2.1e-08
Slc26a7	2.56098	2.29e-08
Slc16a2	4.64658	2.31e-08
Nexn	2.65941	2.37e-08
Chic1	2.18863	2.37e-08
Slc37a1	-6.95598	2.37e-08
Slc25a4	1.77184	2.56e-08
Prom1	4.31523	2.58e-08
Gm10053	2.8013	2.62e-08
Sorcs1	4.0099	2.7e-08
Pgf	-7.38008	2.83e-08
Arhgap6	4.47686	3.03e-08
Atp5k	1.76575	3.1e-08
Lactb2	3.36629	3.1e-08
Mc1r	1.90025	3.1e-08
Pmp2	-4.33525	3.29e-08
Padi2	3.5292	3.4e-08
Gm2115	2.6817	3.4e-08
Tnfrsf21	-3.68403	3.46e-08
Hspb8	-5.0737	3.47e-08
Lsm8	1.55907	3.47e-08
Sobp	4.13231	3.56e-08
Akr1c13	-2.4674	3.64e-08
Bcat1	-4.97238	3.64e-08
Cycs	2.36929	3.68e-08
Rab17	-6.24088	3.76e-08
2310057J18Rik	-6.62427	4.03e-08
Nudt19	2.32514	4.03e-08
Rarg	-1.45543	4.09e-08
Lgals9	-3.65758	4.09e-08
Ifitm3	-2.31687	4.09e-08
Pde3a	4.85212	4.31e-08
Pard6g	-5.17919	4.47e-08
Emp2	-2.18834	4.52e-08
Ndufb2	1.79801	4.75e-08
Ifi30	-4.7194	4.75e-08
Col5a1	-3.70882	4.78e-08
Pycard	5.20686	5.19e-08
Car2	6.07165	5.95e-08
Foxd1	-10.055	6.21e-08
Gm8882	-9.49311	6.21e-08
Fgf1	1.94503	6.35e-08
Sec61g	2.43477	6.57e-08
Kcnmb4	3.15718	6.57e-08
Phldb3	2.92083	6.57e-08
Nckap5l	-2.21584	6.57e-08
Bola3	2.04201	6.57e-08
Gm16867	7.82957	6.66e-08
Tjp2	-2.35074	6.67e-08
Ccdc136	-2.98653	6.71e-08
Mapkapk3	-1.59043	6.75e-08
Ptchd1	6.65668	6.78e-08
Prb1	-9.25833	6.78e-08
Coro2b	-2.85891	6.79e-08
Mrgprx2	3.70817	7.09e-08
Itpr3	-5.50991	7.27e-08
Car6	-2.06912	7.27e-08
Gnal	-4.04445	7.64e-08
Itga6	-1.47581	8.05e-08
Tubb3	3.49137	8.46e-08
Ddah1	-1.71254	8.62e-08
Neil2	-2.44115	8.76e-08
Hdac7	-1.71476	8.82e-08
Cyp2d22	-6.70041	8.86e-08
Map2	4.11913	8.86e-08
Ssbp3	-1.40398	9.04e-08
Idh3a	1.90018	9.33e-08
Bmyc	-3.22829	9.35e-08
Plod1	-1.65315	9.43e-08
Atp9a	-2.78875	9.43e-08
Acy3	-3.05202	9.82e-08
9330159F19Rik	4.13886	9.99e-08
Sv2c	5.91495	9.99e-08
Uqcrb	2.34678	9.99e-08
Pcolce	-2.26222	1.03e-07
Sardh	-1.71984	1.04e-07
Il33	4.70859	1.07e-07
Smyd3	1.77446	1.07e-07
Myof	-4.10244	1.09e-07
Sec11c	1.94665	1.09e-07
Fnbp1l	-1.598	1.09e-07
H2aj	1.41533	1.11e-07
Gm3776	2.25407	1.11e-07
Tns1	-10.2543	1.11e-07
Rassf2	-3.06614	1.12e-07
Hk2	1.40244	1.13e-07
Unc5b	-4.27697	1.21e-07
Irf4	-3.83892	1.25e-07
Ndufs4	2.18182	1.3e-07
Tbkbp1	-4.94082	1.3e-07
Eif4e3	2.11521	1.3e-07
Exoc4	1.50599	1.3e-07
Atpif1	2.25974	1.34e-07
Ptgr1	8.02568	1.36e-07
Brca1	2.15027	1.39e-07
Sec61b	1.5648	1.46e-07
G0s2	9.80862	1.48e-07
Prkcd	-1.53254	1.6e-07
Pid1	6.99645	1.73e-07
Tceal9	1.62327	1.78e-07
Eif2s3y	9.6192	1.82e-07
Tnik	-1.92817	1.84e-07
Cyp7a1	6.06834	1.85e-07
Elf4	-6.28434	1.85e-07
Igf2bp1	-4.01047	2.03e-07
Ift20	1.60517	2.15e-07
Add3	-1.65097	2.17e-07
Cdk6	2.33031	2.21e-07
Ceacam1	-5.19097	2.22e-07
Ndufb3	1.45476	2.24e-07
Sdc2	1.39244	2.27e-07
Tafa5	-4.27282	2.32e-07
Tinagl1	1.66798	2.32e-07
Bscl2	-1.54852	2.32e-07
Cacna2d1	-5.41654	2.4e-07
Ldhb	1.58457	2.44e-07
Cntf	10.224	2.44e-07
Chd7	-2.208	2.44e-07
Tiam1	-6.05461	2.53e-07
Hpgds	-3.19508	2.55e-07
Micos10	1.47328	2.56e-07
Lmx1b	2.98729	2.63e-07
H4c9	2.75401	2.63e-07
Bhlhb9	2.99359	2.65e-07
Nkd1	2.63522	2.66e-07
Map1b	-3.20646	2.66e-07
Dip2b	-1.63951	2.69e-07
Lgals3bp	-2.12179	2.79e-07
Ndufa4	2.71033	2.87e-07
Cyren	1.83741	2.9e-07
Trp53inp2	1.58739	2.9e-07
Uqcr10	2.17676	2.91e-07
Cox6b1	1.52517	2.92e-07
Slc49a4	2.99224	2.99e-07
Map1a	-4.36199	3.02e-07
Cpt1c	-4.36999	3.08e-07
Uty	5.02136	3.21e-07
Tor4a	-5.95886	3.23e-07
Slc43a3	5.03451	3.3e-07
Fuom	-3.26212	3.3e-07
Mrpl36	1.44564	3.34e-07
Axl	-2.50039	3.44e-07
Nfatc1	-4.11891	3.56e-07
Heg1	-4.77955	3.56e-07
Hbegf	-2.31254	3.56e-07
Nfix	-2.31705	3.63e-07
Frrs1	-2.03467	3.69e-07
Rnf128	1.23683	3.7e-07
Mex3a	-1.78286	3.72e-07
Etl4	2.00748	3.87e-07
Slc29a1	-8.35763	3.91e-07
2210016F16Rik	6.34973	3.94e-07
Cox7c-ps1	2.82508	4.25e-07
Fads2	-4.26561	4.37e-07
Cd200r4	3.00018	4.41e-07
Sh3bp1	-3.52667	4.5e-07
Clybl	2.54538	4.54e-07
Ndufa5	2.33899	4.54e-07
Shc4	1.36105	4.61e-07
Shc1	-1.46612	4.65e-07
Chchd7	2.09985	4.91e-07
Clcn4	1.49525	4.91e-07
Nipa1	2.24241	4.93e-07
Oplah	-4.35402	4.93e-07
Adgre5	-2.58335	4.97e-07
Sorcs2	-3.46293	5.01e-07
Mrpl55	2.43761	5.02e-07
Slc25a3	1.26425	5.1e-07
Aass	4.75502	5.13e-07
Blvrb	-2.47081	5.13e-07
Limd2	-1.44962	5.13e-07
Inka2	5.78778	5.24e-07
Cox7a2	1.94544	5.25e-07
Dnm2	-1.14792	5.27e-07
Psma2	1.29176	5.35e-07
Chchd4	1.32885	5.6e-07
Trak1	-1.37956	5.6e-07
Got1	1.73381	5.6e-07
Scgn	6.48471	5.61e-07
Mindy3	1.17479	5.66e-07
Sdsl	-2.9268	5.73e-07
Htra2	1.44511	5.78e-07
Rhou	-1.43987	5.98e-07
Met	1.51916	6.35e-07
Eogt	1.26082	6.46e-07
Snrpg	1.45459	6.49e-07
Sv2a	-2.70585	6.59e-07
Pole4	1.42889	6.86e-07
Slco3a1	1.28591	6.86e-07
Exosc6	9.609	6.86e-07
Mtpn	1.08455	6.86e-07
Prxl2a	2.32441	6.93e-07
Skp1	1.17445	7.05e-07
Mmut	1.10114	7.05e-07
Smim4	2.19121	7.21e-07
Chchd3	1.47292	7.27e-07
Dync2i1	7.35592	7.27e-07
Mtss1	-2.29076	7.35e-07
Ltbr	1.25932	7.35e-07
Npdc1	-1.23092	7.36e-07
Cdkn2b	2.86087	7.49e-07
Arhgef5	5.92409	7.95e-07
Fgf12	9.62795	7.95e-07
Selenos	1.51289	7.99e-07
Bdh1	-3.51812	8.01e-07
Myrf	-4.8463	8.29e-07
Zcchc3	-3.37685	8.47e-07
Zmat3	1.03113	8.5e-07
Npr3	-2.36856	8.51e-07
Myh9	-1.08413	8.52e-07
Zmiz1	-1.27395	8.84e-07
Atox1	1.22468	8.84e-07
Olfml2b	-3.9019	8.84e-07
Ogfrl1	2.14137	8.86e-07
Prl2c5	-7.13051	8.9e-07
Gpr155	3.66739	9.15e-07
Chst2	2.50248	9.6e-07
Cdk15	1.24023	9.61e-07
Megf6	-2.49639	9.66e-07
Gng12	1.08402	9.83e-07
Pdpn	1.66701	9.84e-07
Col1a2	2.60361	1e-06
Kcnk5	-1.92406	1.01e-06
Macf1	1.25765	1.01e-06
Eva1b	6.30186	1.01e-06
Glrb	1.54091	1.01e-06
Suclg1	1.08856	1.06e-06
Spats2	-1.32198	1.08e-06
Abhd4	-1.50277	1.09e-06
Plekha6	-6.04169	1.1e-06
Mfap3l	1.79685	1.12e-06
Art3	-2.09325	1.12e-06
Mpc2	1.32075	1.12e-06
Sdhb	1.20454	1.13e-06
Col4a2	1.69124	1.13e-06
Ap3m2	1.34199	1.14e-06
Gas6	-5.63143	1.15e-06
Fbxo7	-1.25246	1.15e-06
Ehbp1l1	-1.53557	1.15e-06
Atp5mpl	2.06462	1.15e-06
Adam15	-1.63583	1.17e-06
Prex1	-4.16591	1.18e-06
Afap1	-1.57227	1.18e-06
Cfap54	1.85898	1.18e-06
Npc1	-1.06834	1.18e-06
Pgpep1	1.19251	1.22e-06
Ctnnal1	1.3728	1.23e-06
Hspg2	-1.26414	1.24e-06
5730409E04Rik	1.8242	1.24e-06
Higd1a	1.42324	1.24e-06
Dach1	3.8933	1.25e-06
Klf10	-2.0365	1.25e-06
2610001J05Rik	1.30967	1.26e-06
Atp5j	1.41259	1.26e-06
Niban2	-1.54109	1.29e-06
Ndufc2	1.48111	1.29e-06
Dok5	-4.6817	1.3e-06
Hsbp1	1.33475	1.32e-06
Mdm2	1.10981	1.32e-06
Tbc1d9	-5.4157	1.38e-06
Mrpl51	1.13104	1.4e-06
Kank1	-8.86833	1.42e-06
Sdc3	1.96953	1.45e-06
Cox7c	2.85796	1.45e-06
Nme2	1.11059	1.46e-06
Afap1l2	-4.75571	1.49e-06
Cetn3	1.43894	1.5e-06
Slc1a5	-2.18596	1.51e-06
S100a6	4.21051	1.52e-06
F2r	-3.56768	1.54e-06
Vps37b	-1.82421	1.54e-06
Olfml1	8.89251	1.54e-06
Gng10	1.62523	1.55e-06
Aebp1	-1.10445	1.58e-06
Notch2	-1.42207	1.59e-06
Ggt1	-6.37197	1.6e-06
Adam23	-1.9456	1.6e-06
Gorab	1.87952	1.6e-06
Ppia	1.31137	1.6e-06
Abcb1b	2.21623	1.62e-06
Spp1	-2.92929	1.62e-06
Arfgef3	1.92945	1.63e-06
Pdcd5	1.75418	1.63e-06
Tspan32	-8.31573	1.64e-06
Smim27	2.44148	1.64e-06
Tcf7l1	-1.22488	1.65e-06
Ttll7	-4.67995	1.65e-06
C4b	-5.24405	1.65e-06
Fgfr2	-8.76026	1.65e-06
Mecom	-1.1202	1.66e-06
Smagp	-2.87972	1.66e-06
Kdm5d	2.75425	1.67e-06
Cdkn1a	3.08303	1.67e-06
Unc5c	1.53717	1.69e-06
Myh14	-3.69008	1.72e-06
Dact2	-8.39795	1.72e-06
Polr2l	1.05397	1.75e-06
Top1mt	-6.86009	1.75e-06
Cox5b	1.07626	1.75e-06
Bcan	-8.30162	1.75e-06
Atp6v0e	0.939751	1.77e-06
B3galt2	8.11172	1.81e-06
Emilin1	-2.9531	1.86e-06
Cited1	-2.01084	1.86e-06
1810037I17Rik	1.26893	1.86e-06
Zmynd8	-1.03534	1.89e-06
Cdc14b	2.32136	1.89e-06
Kdr	-9.92737	1.89e-06
Cercam	-4.50037	1.9e-06
Guk1	1.20874	1.93e-06
Nudt2	1.76423	1.95e-06
Chchd10	4.85271	1.95e-06
Syt4	2.58833	1.95e-06
Capza2	1.12628	1.95e-06
Prpmp5	-9.28646	1.96e-06
Ndufab1	1.02076	1.97e-06
Prodh	-2.06122	1.97e-06
Pmepa1	-2.16721	1.97e-06
Tpcn1	-1.40214	1.98e-06
Ubl3	1.17505	1.99e-06
Pet100	1.60912	1.99e-06
Pik3cd	-7.76899	2.01e-06
Nin	1.54387	2.01e-06
Agbl3	1.78506	2.01e-06
Sulf2	-3.62464	2.04e-06
Slc29a3	-1.95357	2.12e-06
Gm13889	5.25497	2.13e-06
Nynrin	-5.42957	2.13e-06
Smad6	-3.57498	2.14e-06
Gfra1	3.28131	2.15e-06
Lrrc4b	-3.15147	2.21e-06
Ephb4	-3.77723	2.22e-06
Clcn7	-1.13909	2.23e-06
Tgm2	-6.45442	2.25e-06
Agrn	-1.30372	2.26e-06
Il3ra	4.13755	2.26e-06
Elovl7	1.23437	2.26e-06
Ctsa	-1.10882	2.26e-06
Cfap74	1.58868	2.29e-06
Cyp2u1	1.95805	2.3e-06
Phactr2	1.3364	2.32e-06
Ss18l2	1.56908	2.34e-06
Kifap3	1.47552	2.36e-06
Nectin1	-4.15684	2.45e-06
AI467606	-8.97114	2.52e-06
Sec14l1	-1.19843	2.6e-06
AK157302	1.97891	2.62e-06
Atp5c1	1.0855	2.62e-06
Fads3	5.2002	2.62e-06
Puf60	-1.07561	2.68e-06
Pbx1	-1.47554	2.73e-06
Stag3	3.85919	2.74e-06
Pmp22	1.4565	2.77e-06
Fam189b	-4.03587	2.82e-06
Rabl6	-0.920171	2.87e-06
Cenpw	1.61069	2.87e-06
Znfx1	-1.07666	2.88e-06
Hoxa5	2.85786	2.88e-06
Mgat5	1.10193	2.9e-06
Ece1	-5.05756	2.97e-06
Slc44a2	-1.49671	2.98e-06
Atp5pb	1.14828	2.99e-06
Jun	-1.68949	3.02e-06
Naa38	1.05311	3.02e-06
Cables1	-5.92874	3.03e-06
Tmem63a	-1.08404	3.03e-06
1810065E05Rik	-3.66758	3.03e-06
Fh1	1.16905	3.05e-06
Soat1	-1.02199	3.09e-06
Slc22a18	-3.34068	3.09e-06
Gabra1	8.62486	3.09e-06
Shisa5	-1.11668	3.09e-06
Grb10	-6.16822	3.11e-06
Psg23	2.98366	3.2e-06
Pou3f2	3.39222	3.22e-06
Sub1	1.04652	3.22e-06
Sem1	1.74253	3.28e-06
Cd200	3.10374	3.28e-06
Cmc2	1.19607	3.33e-06
Nes	-4.70561	3.4e-06
Dclk1	1.37817	3.42e-06
Mrps21	1.10102	3.43e-06
Mapk12	5.80398	3.43e-06
Ndufv3	0.968625	3.43e-06
Gabrb3	2.40923	3.46e-06
Trpm1	2.01933	3.46e-06
Ndufb6	1.73685	3.46e-06
Dpy30	1.27284	3.52e-06
Mrpl53	1.09365	3.52e-06
Tyr	1.23443	3.52e-06
Nr1i2	-6.90491	3.58e-06
Tbrg1	-0.963832	3.58e-06
Unc13b	3.44337	3.68e-06
Itpr1	1.04609	3.78e-06
Sdha	0.940803	3.78e-06
Stard10	-2.72079	3.79e-06
Tmf1	1.21203	3.79e-06
Rab34	-1.24579	3.8e-06
Pgbd5	2.59232	3.84e-06
Dact1	2.70031	3.84e-06
Ccl6	-6.47921	3.86e-06
Gm45716	2.76431	3.86e-06
Ptprd	1.49999	3.89e-06
Clmn	-1.34296	3.9e-06
Il6st	-1.3801	3.91e-06
Rbis	1.95885	3.92e-06
Akr1b10	1.00012	3.93e-06
Ets1	-1.18698	3.93e-06
Carhsp1	1.42112	3.94e-06
Bmp1	-2.05031	3.97e-06
Coro7	-1.07433	4.04e-06
Soga3	3.42848	4.04e-06
Prdx1	1.11715	4.06e-06
Git2	-1.15299	4.1e-06
Fabp5	1.12378	4.1e-06
Glrx3	1.06737	4.1e-06
Pon2	1.32797	4.1e-06
Phlda3	1.17058	4.1e-06
Phlda2	-7.97254	4.1e-06
S100a1	2.29829	4.1e-06
Mtss2	-1.26469	4.14e-06
Onecut2	1.51876	4.2e-06
Pdlim2	-1.58489	4.28e-06
Telo2	-1.15562	4.28e-06
Nectin2	-1.26837	4.29e-06
Cers1	-1.84288	4.32e-06
Micall1	-1.11401	4.36e-06
Slc12a9	-1.71862	4.38e-06
Gm4540	2.88115	4.38e-06
Abhd3	4.67394	4.42e-06
Acot11	-4.83279	4.51e-06
Retsat	1.22024	4.54e-06
Vamp5	1.1829	4.55e-06
Hr	-4.63555	4.56e-06
Ssbp1	1.53354	4.56e-06
Cadm1	-0.976916	4.64e-06
Vav2	-2.53835	4.68e-06
Nr2f2	-1.37957	4.68e-06
Map1lc3a	-1.31519	4.7e-06
S100a10	-2.2816	4.71e-06
Spata7	2.51752	4.71e-06
Siva1	1.01082	4.71e-06
H1f0	-1.45049	4.71e-06
Rnf113a2	6.17701	4.79e-06
Mrps25	1.18252	4.79e-06
Trak2	1.30063	4.79e-06
Hmgn3	1.01696	4.8e-06
Pxdc1	-4.67322	4.86e-06
Dusp2	-1.30924	4.92e-06
Ipo4	-1.69321	4.96e-06
Spink10	1.90256	5.04e-06
Kdelr3	-4.64333	5.04e-06
Gm9844	1.18993	5.16e-06
Gatad2b	-0.976119	5.16e-06
Slc38a2	-1.28281	5.22e-06
Tgfb2	2.48901	5.22e-06
Apoo	1.68693	5.22e-06
Cyp4b1	-2.70154	5.22e-06
Mrps33	1.98081	5.22e-06
Fundc2	1.09324	5.31e-06
Aopep	1.99809	5.39e-06
Hcn1	-1.48966	5.41e-06
Lama5	-2.80227	5.43e-06
Col14a1	-2.84673	5.46e-06
Mcee	2.08246	5.49e-06
Igf2bp3	-5.74611	5.49e-06
Plekho2	-1.32243	5.52e-06
Elovl4	-2.49039	5.52e-06
Ccl9	-7.43148	5.52e-06
Dlk2	-3.50287	5.62e-06
Hibadh	1.13831	5.62e-06
Idua	-3.15229	5.9e-06
Ralgds	-1.31816	5.93e-06
Cisd1	1.1942	6.07e-06
Taf13	1.13484	6.08e-06
Helz2	-2.06521	6.11e-06
Gm7240	3.29249	6.13e-06
Dennd2a	1.76158	6.13e-06
1810058I24Rik	0.973306	6.18e-06
Tgfa	-3.50006	6.18e-06
Cacng7	4.91942	6.18e-06
Dock3	-1.2604	6.19e-06
Gpr107	-0.884855	6.2e-06
Specc1	1.56921	6.2e-06
Nol7	1.26127	6.22e-06
Dgkh	-2.17485	6.22e-06
Sf3b6	1.08793	6.27e-06
Shox2	2.04361	6.31e-06
Zfp386	1.68235	6.31e-06
C1ra	2.44691	6.32e-06
Grina	-1.07099	6.33e-06
Rundc3a	-3.37197	6.46e-06
Fads6	-3.82689	6.46e-06
Ahcyl2	1.05558	6.48e-06
Gca	8.80332	6.49e-06
Chsy3	0.98166	6.57e-06
Procr	-5.63062	6.57e-06
Dmd	3.16506	6.61e-06
Wrap53	3.20813	6.73e-06
Abhd2	1.41192	6.73e-06
Sema3b	-0.949994	6.76e-06
Cops9	2.19487	6.79e-06
H3c3	3.84653	6.84e-06
Bet1	2.08722	6.87e-06
Bmt2	1.15272	6.97e-06
Bst2	-2.6003	7.05e-06
Fstl4	3.1596	7.06e-06
Atp5l	1.53505	7.16e-06
Atp5md	2.14995	7.22e-06
Sema4b	-1.25399	7.27e-06
Cav2	0.987589	7.33e-06
Col5a3	-1.60474	7.33e-06
Serp2	-2.80305	7.33e-06
Zbtb46	-2.843	7.35e-06
Mme	1.31781	7.35e-06
B4galnt4	-7.94369	7.4e-06
Vopp1	1.24976	7.4e-06
Lsm5	1.73971	7.4e-06
Gm5154	-7.19366	7.41e-06
Adora2a	-4.72083	7.43e-06
Tuba4a	-2.69625	7.43e-06
Lsm3	1.19653	7.45e-06
Gramd1c	-5.48405	7.48e-06
Lage3	0.957328	7.49e-06
Reep6	-2.74035	7.59e-06
Prr5	-7.80256	7.59e-06
Tma7	1.35774	7.68e-06
Fam177a2	1.0806	7.71e-06
Ccnd2	1.22678	7.76e-06
Thsd7a	2.43671	7.76e-06
Mmp16	1.7394	7.76e-06
Plcb1	3.11934	7.8e-06
Abcc1	-1.11053	7.82e-06
Aldh1l2	-6.17523	7.99e-06
Hoxa7	2.4324	7.99e-06
Rpl36al	1.49099	8.06e-06
Ephb2	-3.54671	8.16e-06
Nhs	1.28273	8.21e-06
Shroom3	-3.30359	8.21e-06
Edem3	0.993456	8.21e-06
Vamp2	1.50497	8.26e-06
Gtf2h5	0.990461	8.26e-06
Phlda1	0.989482	8.28e-06
P3h3	1.67811	8.29e-06
Pcdhb22	-1.51792	8.3e-06
Plec	-1.13431	8.3e-06
Lrrc8a	-1.00097	8.3e-06
Cep112	3.00325	8.3e-06
Timm8b	1.57384	8.31e-06
Mfhas1	-2.25943	8.32e-06
Mlf1	2.66439	8.38e-06
Ttc7	-1.36122	8.4e-06
Ptp4a3	-2.48125	8.4e-06
Igfbp7	2.14002	8.48e-06
Dmac1	1.08423	8.51e-06
Plod3	-1.04469	8.51e-06
Cdc42se1	-1.1076	8.51e-06
Meis2	-0.958444	8.51e-06
Mdh1	1.62324	8.51e-06
Ubr5	-0.972774	8.51e-06
Dpysl3	-1.50767	8.6e-06
Epb41l1	-2.75778	8.6e-06
Prdx4	0.875268	8.61e-06
Zfp365	5.60906	8.62e-06
Cbl	-0.861085	8.64e-06
Gdpd5	-3.16338	8.78e-06
Cyp26b1	-3.81027	8.82e-06
Cbx3	1.00621	8.94e-06
Tbc1d2	1.73235	8.98e-06
Malsu1	1.12438	9.2e-06
Cachd1	-1.92161	9.38e-06
Grk2	-1.00308	9.58e-06
Mrps36	0.98472	9.7e-06
mt-Nd5	1.54965	9.75e-06
Selenok	0.952517	9.75e-06
Rhbdf1	-1.46598	9.82e-06
4930523C07Rik	-2.28881	9.89e-06
Itga1	-1.17572	9.89e-06
Lyn	-1.38857	9.96e-06
Skil	-1.42906	9.99e-06
Unc93b1	-3.40275	9.99e-06
Tnpo3	0.896392	9.99e-06
Tomm34	-1.15488	9.99e-06
Lrat	-7.95192	9.99e-06
Dlgap4	-1.00028	9.99e-06
Prnp	-1.36237	1e-05
Ndufa3	1.33948	1.01e-05
Efemp1	-5.01294	1.01e-05
AI413582	1.01379	1.01e-05
Mospd3	-1.18944	1.02e-05
C130050O18Rik	-5.80243	1.02e-05
Bpgm	1.35808	1.02e-05
Gm5340	2.78159	1.03e-05
Sdhaf4	1.63943	1.05e-05
Aatk	-5.16156	1.06e-05
Faah	-2.40569	1.07e-05
Rps27l	1.66909	1.08e-05
Agpat2	-1.39185	1.09e-05
Nrros	-5.92079	1.09e-05
Plpp2	-0.814021	1.09e-05
Mxra7	-1.37737	1.1e-05
Hdgfl3	-4.75445	1.1e-05
Mfsd14b	1.14541	1.11e-05
Cpa6	1.46855	1.11e-05
Anp32a	-1.09433	1.11e-05
Ccbe1	-8.60736	1.12e-05
Tecrl	2.7669	1.12e-05
Glrx	1.81501	1.12e-05
Pxn	-1.45114	1.13e-05
Tead2	-3.21793	1.14e-05
Pde7a	-0.985619	1.14e-05
Ndufb5	1.24981	1.18e-05
Thnsl2	5.48438	1.18e-05
Kdm5c	-0.800449	1.18e-05
Lifr	-2.30671	1.18e-05
Brd1	-0.955701	1.18e-05
Bex3	0.957358	1.19e-05
Samd4	-1.23398	1.2e-05
Ripor1	-1.01638	1.22e-05
5031439G07Rik	1.32676	1.22e-05
Osmr	7.33217	1.22e-05
Etfrf1	1.64305	1.22e-05
Wnk4	-4.08469	1.23e-05
Slc4a1ap	-1.10075	1.23e-05
Scamp2	-1.03257	1.23e-05
Sacm1l	1.01148	1.23e-05
Tstd3	1.52901	1.23e-05
Lrp12	-1.62897	1.24e-05
Bace1	-0.914482	1.24e-05
Fmnl3	-1.82025	1.24e-05
Esrra	1.19287	1.24e-05
Bri3bp	-0.753669	1.25e-05
Zfp775	1.2241	1.27e-05
Mtap	1.14083	1.28e-05
Tcf7	2.63085	1.29e-05
Chchd6	1.51355	1.3e-05
Glis3	1.38317	1.3e-05
Gstm4	-7.49104	1.31e-05
Mrpl34	0.962829	1.31e-05
Slc25a44	-0.988953	1.32e-05
Bgn	4.76601	1.33e-05
Stk17b	1.18982	1.33e-05
Atp5g3	1.18683	1.33e-05
Tamalin	-1.6172	1.33e-05
Brk1	0.868844	1.33e-05
Mkks	1.48246	1.33e-05
Nmnat2	3.02154	1.34e-05
Ncam1	-1.02511	1.34e-05
Gcn1	-0.85034	1.36e-05
Rala	1.15969	1.36e-05
Ankrd26	0.842599	1.37e-05
Pfkm	-1.36999	1.38e-05
Uqcr11	1.35041	1.39e-05
B4galt2	4.7737	1.4e-05
Fkbp3	1.16096	1.4e-05
Fxyd5	-3.87264	1.4e-05
Lrrcc1	1.48942	1.42e-05
Immt	0.976918	1.42e-05
Zfp710	1.69373	1.42e-05
Gng11	-1.91623	1.43e-05
Ciz1	-1.00425	1.45e-05
Acp1	1.03044	1.46e-05
Hilpda	1.01797	1.47e-05
Pak3	2.23284	1.47e-05
Galnt12	-3.35134	1.47e-05
Socs2	-1.378	1.47e-05
Grik2	-1.27319	1.48e-05
Ncor2	-1.01398	1.48e-05
Sik3	-0.943483	1.48e-05
Txn1	1.21939	1.49e-05
Mta2	-0.922415	1.49e-05
Ndn	-4.59193	1.49e-05
Cdc37	-0.7479	1.5e-05
Prkaa2	1.65966	1.5e-05
Grn	-0.932309	1.51e-05
Smarcb1	-1.03482	1.53e-05
H1f4	-1.68926	1.54e-05
Pole3	0.890496	1.55e-05
Rbms3	-0.914347	1.56e-05
Dipk2a	1.68424	1.57e-05
Nagpa	-1.26998	1.57e-05
Serpinb6a	1.12555	1.57e-05
Klf9	-1.13972	1.57e-05
Npy	8.0569	1.58e-05
Efhd1	-4.90781	1.59e-05
Ppp1r3b	-7.39854	1.59e-05
Proser2	1.97944	1.6e-05
Syce2	7.93887	1.6e-05
Gramd1b	-2.76769	1.61e-05
Ccdc122	1.7848	1.61e-05
Itpr2	-1.13507	1.61e-05
Cebpzos	1.75392	1.61e-05
Dmrta2	-2.31149	1.64e-05
Nop10	1.26688	1.65e-05
Axin2	1.93213	1.65e-05
Zfp120	1.66995	1.65e-05
Jade2	2.73899	1.65e-05
Ankrd2	-2.72167	1.67e-05
Gatad2a	-0.872636	1.67e-05
Adamtsl5	2.08263	1.68e-05
Pcbd2	1.4627	1.69e-05
Ttc39b	1.17019	1.69e-05
Cdc42ep5	1.56453	1.7e-05
Fgfr1op2	0.952531	1.7e-05
Eng	-1.19621	1.7e-05
Gng8	-3.74616	1.72e-05
Snx18	-1.1471	1.74e-05
Romo1	1.0252	1.74e-05
Fktn	1.10169	1.74e-05
Rpl35	2.1859	1.74e-05
Ptpn14	-0.916524	1.75e-05
Por	-0.96417	1.75e-05
Poldip3	-0.944045	1.76e-05
Timm10b	0.928695	1.8e-05
Aff3	-1.49517	1.84e-05
Fam107b	-1.76716	1.84e-05
Colgalt1	-1.12786	1.85e-05
Iftap	1.45279	1.86e-05
Azgp1	-3.39154	1.86e-05
Cited2	1.73617	1.87e-05
Tox4	-0.82053	1.87e-05
Fam162a	1.17837	1.87e-05
Zbtb42	-2.96054	1.88e-05
Aars	-1.02747	1.88e-05
Dok6	4.84622	1.88e-05
Eif3b	-0.87731	1.88e-05
Tll1	2.81683	1.88e-05
Pgm2l1	2.12943	1.89e-05
Pabpc4	0.959166	1.9e-05
Mtln	1.99167	1.9e-05
Ndufc1	1.63728	1.91e-05
Pxdn	-3.50251	1.91e-05
Tnfaip6	-3.86804	1.92e-05
Mfsd1	-0.855399	1.92e-05
Fndc4	-4.85659	1.92e-05
Dennd11	2.05251	1.92e-05
Rsad2	-2.36153	1.92e-05
Lrrc8d	-1.05988	1.92e-05
Acat1	0.96387	1.92e-05
Rhob	-1.6825	1.93e-05
Bcl9l	-1.08792	1.94e-05
Scg5	3.41917	1.94e-05
Zfp609	-1.191	1.94e-05
Lipa	-2.05581	1.96e-05
Kbtbd11	-2.16378	1.96e-05
Lrp5	-2.07505	1.96e-05
Mr1	-1.65738	1.96e-05
Ctsz	-0.804734	1.97e-05
Il2rg	-8.75957	1.99e-05
Magohb	1.48047	1.99e-05
Sh2b2	-4.22276	1.99e-05
Mrpl41	1.26212	2.01e-05
Lcmt1	0.966166	2.01e-05
Crebl2	1.13633	2.02e-05
Tm9sf4	-0.858703	2.02e-05
Slc6a9	-3.30902	2.04e-05
Gk	1.4445	2.04e-05
Dlg3	1.84378	2.05e-05
Anapc11	0.747408	2.06e-05
Gstm2	-1.01942	2.08e-05
Scp2-ps2	1.11148	2.08e-05
Tacc2	-1.45373	2.08e-05
Med12	-0.888319	2.11e-05
Mfsd10	-0.929075	2.11e-05
Ndufb10	1.08317	2.11e-05
Snrpd2	0.886389	2.11e-05
Ccdc88c	-4.18621	2.11e-05
Slc35f1	1.46513	2.12e-05
Isca1	1.8429	2.12e-05
Ctsc	1.03496	2.12e-05
Casp1	-4.65892	2.12e-05
Pdlim1	-2.43923	2.15e-05
Cpeb3	1.42508	2.15e-05
Ahnak2	-1.03192	2.15e-05
Tmem267	1.78669	2.16e-05
Pak2	-0.756935	2.23e-05
Ptcd3	0.852989	2.23e-05
Rapgef2	0.911641	2.24e-05
Arl4a	2.73465	2.24e-05
Fam81a	-3.96654	2.24e-05
Pdgfb	-4.54589	2.25e-05
Zswim8	-0.887799	2.25e-05
Commd1	1.40524	2.26e-05
Osbpl5	-0.935682	2.26e-05
Cobll1	1.03199	2.26e-05
Dpysl5	-1.68469	2.27e-05
Aif1l	-2.2971	2.28e-05
Adamtsl4	-2.1113	2.3e-05
Id4	-2.27548	2.3e-05
Ahdc1	-0.947415	2.3e-05
Cox6c	1.88392	2.3e-05
Nudcd2	1.074	2.31e-05
Ptar1	0.965836	2.32e-05
C920009B18Rik	-1.41496	2.32e-05
Vac14	-0.980046	2.32e-05
Ifnar2	-0.820533	2.32e-05
Uqcrc2	0.843983	2.32e-05
Zfpm1	-1.77849	2.33e-05
Celsr2	-1.54802	2.33e-05
Rab3d	-1.18052	2.34e-05
Dab2ip	-0.763226	2.37e-05
Atp5b	0.814263	2.37e-05
Tyro3	-1.19194	2.37e-05
Nt5c3	0.978796	2.37e-05
Aplp2	-0.864079	2.41e-05
Clstn1	-0.852576	2.42e-05
Mtx2	0.937668	2.43e-05
Eif3d	-0.774629	2.43e-05
Ndufa9	0.803799	2.43e-05
Nrgn	-5.84334	2.46e-05
Lrrc8c	-1.04486	2.48e-05
Rxra	-1.00673	2.49e-05
Stat3	-0.96364	2.51e-05
Naga	-1.45317	2.51e-05
Ano10	-0.884798	2.51e-05
Sun2	-0.967659	2.51e-05
Aen	1.35245	2.51e-05
Dqx1	1.92222	2.53e-05
Mgll	1.45256	2.53e-05
Ssbp4	-1.05007	2.53e-05
Plekho1	-1.49381	2.53e-05
Gmds	1.56739	2.53e-05
Atxn2	-0.771587	2.54e-05
Slc22a23	-2.10585	2.56e-05
Ep300	-0.92562	2.56e-05
Tcp11l1	1.2289	2.56e-05
Atp7a	0.817371	2.62e-05
Cetn2	1.10551	2.63e-05
Creb5	-2.11026	2.64e-05
Csrp2	2.05395	2.64e-05
Cdr2l	-1.30557	2.65e-05
Rpl38	1.26715	2.67e-05
Gm2a	1.10997	2.67e-05
Gm11966	1.42517	2.68e-05
Smad9	-5.83239	2.69e-05
Ppm1f	-1.12953	2.71e-05
Ptgir	-4.49215	2.72e-05
Ndst1	-0.888617	2.76e-05
Fgd2	-4.94002	2.76e-05
Zfp268	-3.32353	2.81e-05
Atp1b2	-3.2168	2.81e-05
Sumo1	0.869504	2.81e-05
Il4ra	-2.90863	2.82e-05
Cyb5a	1.09407	2.82e-05
Gns	-0.803886	2.83e-05
Arhgef37	7.52728	2.85e-05
Creg1	-0.9429	2.87e-05
Eno2	4.84923	2.87e-05
Efhd2	-1.21635	2.87e-05
Selenof	1.43338	2.88e-05
Samd5	1.85251	2.89e-05
Eid1	-1.17978	2.89e-05
Fbln5	0.935839	2.91e-05
Hap1	-1.51508	2.95e-05
Irf1	-1.46351	2.95e-05
Stxbp2	-0.941327	2.95e-05
Kbtbd3	1.83235	2.95e-05
Prkcsh	-0.827722	2.99e-05
Arhgef2	-1.21765	2.99e-05
Scoc	1.1245	2.99e-05
Btg3	-3.14118	3e-05
Gm10177	2.25727	3.06e-05
Prrg1	2.55529	3.07e-05
Chst11	-4.5688	3.07e-05
Mif	-0.846513	3.08e-05
Ncs1	-4.51804	3.11e-05
Hmg20a	-0.853199	3.13e-05
Pradc1	1.74527	3.14e-05
Acvrl1	-5.92046	3.18e-05
Camkk1	-2.27188	3.19e-05
Zfp740	-0.979465	3.19e-05
Zfp932	1.77443	3.19e-05
Slc35c2	-1.08498	3.2e-05
Gm4332	2.25578	3.22e-05
Atxn10	-0.762073	3.22e-05
Htra3	-5.70453	3.23e-05
Irf2bpl	-0.867383	3.23e-05
Mrps18c	0.936788	3.25e-05
Chmp3	0.856348	3.26e-05
Zbtb7b	-1.29317	3.27e-05
Zfp385a	-1.91854	3.33e-05
Tmem14a	1.47612	3.33e-05
Nradd	-1.4029	3.34e-05
Slc9a9	1.89308	3.34e-05
Tomm7	1.54662	3.34e-05
Strip1	-0.839042	3.4e-05
Rras2	-2.57361	3.4e-05
Mrpl33	1.24658	3.4e-05
Cd68	-2.927	3.41e-05
Mrps35	1.07802	3.42e-05
Gm6710	1.67534	3.42e-05
Tc2n	1.2243	3.42e-05
Plekha3	0.879193	3.43e-05
Mgst1	1.24678	3.51e-05
Ctnna1	-0.709727	3.51e-05
Prkg2	-3.24078	3.52e-05
Adgrl1	-1.07644	3.53e-05
Lrrc75b	-4.90652	3.53e-05
C1d	1.08868	3.53e-05
2510009E07Rik	-1.51891	3.56e-05
Dcbld1	-0.975292	3.59e-05
Mroh1	-1.2126	3.59e-05
Rbm5	-0.732909	3.59e-05
Fam241a	1.44752	3.6e-05
Smyd5	1.3547	3.61e-05
Unc119	-1.07505	3.61e-05
Tax1bp1	0.703042	3.66e-05
Sars	-1.44978	3.67e-05
Mrpl57	0.933973	3.67e-05
Sirpa	-0.727626	3.67e-05
Atg10	1.60544	3.69e-05
Fem1b	-0.856231	3.69e-05
Ndufb1	2.12975	3.69e-05
Rcor2	-2.09691	3.7e-05
Gpx8	1.29604	3.71e-05
Ndufb8	0.926636	3.71e-05
Lsm6	0.941601	3.74e-05
Mrps12	0.850972	3.76e-05
Adgrl2	0.871816	3.76e-05
Cul1	0.719504	3.8e-05
Bola1	1.15527	3.86e-05
Med21	1.10805	3.94e-05
Trnp1	-2.2418	3.95e-05
Ldlrad4	-5.09741	3.96e-05
H3c1	4.99396	3.96e-05
D7Ertd443e	-6.04375	3.96e-05
Snx8	-0.8034	3.96e-05
Nacc2	-1.19615	3.97e-05
Epdr1	1.0003	3.97e-05
Slain1	3.44216	3.97e-05
Plscr3	-1.52431	3.97e-05
Plekha5	0.847355	3.98e-05
Gpr173	-7.48943	4.03e-05
Acot1	-2.2363	4.03e-05
Hpf1	1.06007	4.04e-05
Gramd4	-5.17402	4.05e-05
Frmd4b	-2.92815	4.06e-05
Dusp19	1.2875	4.07e-05
2300009A05Rik	1.48692	4.09e-05
Atg101	-0.859535	4.13e-05
Sgcb	-0.931447	4.21e-05
Cdk9	-0.689797	4.22e-05
Ndufs5	1.27339	4.28e-05
Atp6v1e1	0.866819	4.3e-05
Crkl	-0.819466	4.31e-05
Zfhx4	1.02538	4.32e-05
Tbca	1.68803	4.32e-05
Tmbim6	-0.820766	4.39e-05
Ahi1	0.866463	4.42e-05
Man2b1	-1.07126	4.44e-05
Plscr2	2.25621	4.52e-05
Gria4	-1.34485	4.54e-05
Osr2	-2.95932	4.56e-05
Ralgapa2	-1.2131	4.57e-05
Slf1	1.28164	4.59e-05
Hoxa3	3.92677	4.6e-05
Samd9l	1.66084	4.61e-05
Tmem106a	-2.03666	4.63e-05
Mien1	0.819636	4.67e-05
Ndufaf4	1.2414	4.69e-05
Sgip1	0.937074	4.69e-05
Eif3g	-0.805038	4.69e-05
Ccdc141	1.09734	4.71e-05
Six3	-7.21616	4.71e-05
Lhfpl2	1.45236	4.72e-05
Mad1l1	-1.19932	4.73e-05
Pla2g6	-1.46628	4.78e-05
Bmf	-1.77666	4.78e-05
Dgkd	-0.965278	4.79e-05
Luc7l3	0.895138	4.8e-05
Atp5j2	1.25254	4.8e-05
Itsn1	-0.885102	4.86e-05
Krcc1	1.27143	4.89e-05
Gpr180	-1.06028	4.89e-05
Tnnt2	-6.20854	4.9e-05
Upp1	7.12997	4.91e-05
Cox17	1.26119	4.92e-05
Abcb7	1.05289	4.97e-05
Aldh5a1	1.82257	4.97e-05
Itpkb	-1.15249	4.97e-05
Cep290	1.14568	4.99e-05
Farp1	-1.33145	4.99e-05
Ppp2r5a	-0.955188	5.03e-05
Bag6	-0.824608	5.04e-05
Ckb	-1.91038	5.05e-05
Tmcc3	-2.44012	5.05e-05
Mboat2	-0.954907	5.05e-05
Fst	5.01348	5.07e-05
Tmem131l	-1.4022	5.08e-05
Mmp15	-1.95375	5.19e-05
Tgif2	-0.68312	5.19e-05
Epc2	-0.711389	5.22e-05
Fam53a	-0.916973	5.24e-05
Slirp	1.72255	5.27e-05
Erf	-1.45091	5.27e-05
Gga1	-0.816045	5.33e-05
Rasgrp3	1.16432	5.35e-05
Gsk3b	-0.855551	5.36e-05
Gm4631	1.05814	5.36e-05
Ksr1	-2.23622	5.38e-05
Stx7	0.821103	5.38e-05
Lhfp	2.0692	5.38e-05
Ebf2	7.07804	5.43e-05
Atp13a1	-0.83795	5.44e-05
Pgrmc1	0.923784	5.44e-05
Ndufv2	1.07417	5.45e-05
Col4a4	2.17415	5.45e-05
Snrk	0.861181	5.47e-05
Prrc2b	-0.736372	5.48e-05
Trp53inp1	1.60112	5.49e-05
Abat	1.19317	5.49e-05
Camsap1	-0.781621	5.5e-05
Ly6c1	-7.91421	5.5e-05
Cox8a	0.902439	5.53e-05
Gm973	-2.37358	5.54e-05
Mmd	1.2584	5.56e-05
Cemip	2.33806	5.56e-05
Csf1	-1.67535	5.56e-05
Plbd2	-0.807392	5.58e-05
Bicd2	1.00274	5.58e-05
Mrpl40	1.01094	5.58e-05
Atp5o	0.96622	5.59e-05
Ccn2	3.01503	5.61e-05
Dusp1	1.31681	5.66e-05
Map7	3.41128	5.66e-05
Syt7	-7.69573	5.68e-05
Zfp516	-0.784412	5.79e-05
Pea15a	-1.37148	5.84e-05
Brd4	-0.73271	5.89e-05
Ptpn11	-0.684897	5.91e-05
Stard9	-1.37976	6.01e-05
Tfap2b	-2.51498	6.01e-05
Ttyh3	-1.40269	6.06e-05
Pabpn1l	-2.87079	6.14e-05
Siae	-1.33238	6.14e-05
Fam193a	-0.78177	6.14e-05
mt-Nd4	1.26483	6.14e-05
Slc19a1	-1.84373	6.18e-05
Nxn	-1.52358	6.18e-05
Peak1	-1.16367	6.22e-05
Bcl9	-1.5178	6.23e-05
Dkk3	0.823675	6.23e-05
Dcxr	1.65358	6.26e-05
Bid	-0.972151	6.3e-05
Cep170b	-0.84803	6.36e-05
Pdcd6	0.785409	6.36e-05
Tmem43	1.02701	6.37e-05
Car5b	2.26137	6.42e-05
1500009L16Rik	1.17218	6.52e-05
Magi1	1.10969	6.59e-05
Gsto1	-1.7068	6.59e-05
Mfsd13a	-3.12621	6.59e-05
Gpd1	-3.07886	6.61e-05
1500011B03Rik	1.12747	6.61e-05
Dglucy	1.85728	6.66e-05
Cmtm8	-3.19201	6.66e-05
Lgals3	-2.03401	6.66e-05
Mindy1	-1.10182	6.69e-05
Tsc22d2	-0.825089	6.71e-05
Lipe	-1.47686	6.77e-05
Ufl1	0.911258	6.79e-05
Iqce	-1.12575	6.81e-05
Foxp4	-1.5574	6.81e-05
Kctd15	-1.18938	6.83e-05
Emc3	0.604259	6.83e-05
Commd3	1.10805	6.88e-05
Vat1l	-7.66726	6.9e-05
Zfp518b	-3.83502	6.95e-05
Ndufs1	0.729448	6.95e-05
Nhsl1	1.877	6.96e-05
Pabpc1	-0.951068	6.97e-05
Kif26a	-7.00254	6.98e-05
Insig2	1.10368	7.03e-05
Smc6	1.22701	7.04e-05
Sipa1l2	-1.09013	7.05e-05
Arl1	0.99535	7.08e-05
Mkrn1	0.912648	7.08e-05
Fez1	-1.35766	7.09e-05
Rapgef4	0.707406	7.11e-05
Plekhh3	-0.980303	7.11e-05
mt-Nd1	1.16523	7.12e-05
Twf1	-0.946679	7.12e-05
Kctd12	1.17455	7.16e-05
Mrpl27	1.04536	7.18e-05
Dlx2	-4.84756	7.18e-05
Ubald1	-0.90635	7.18e-05
Gba	-1.0165	7.3e-05
Ndufa11	0.781793	7.3e-05
Txndc17	1.58708	7.3e-05
Lef1	-2.2358	7.37e-05
Clip3	-1.47112	7.37e-05
Tars	-1.04258	7.41e-05
Ndufaf8	1.13276	7.41e-05
Lima1	0.831814	7.44e-05
Fam217b	-1.78107	7.44e-05
Smarcad1	0.689164	7.45e-05
Was	-1.34012	7.46e-05
Gm14776	2.77282	7.51e-05
1190007I07Rik	1.24495	7.54e-05
Fpgs	-0.965043	7.59e-05
Snrnp25	1.48452	7.59e-05
Tigar	0.936387	7.6e-05
Agap3	-0.826137	7.6e-05
Cbx7	-1.49345	7.62e-05
Shmt2	-1.05168	7.64e-05
Dusp7	-0.972679	7.67e-05
Il18	2.21371	7.67e-05
Ggh	1.73	7.67e-05
Zzef1	0.808862	7.67e-05
Tspan3	0.739993	7.67e-05
Apeh	-0.948451	7.77e-05
Bach2	-3.5644	7.8e-05
Fam32a	1.08748	7.8e-05
Sdhc	0.694994	7.8e-05
Sec16a	-0.965369	7.81e-05
Dmwd	1.50849	7.83e-05
Cibar1	1.00571	7.84e-05
Fubp3	-0.846429	7.84e-05
Rps26-ps1	1.28146	7.86e-05
Thtpa	-1.22923	7.88e-05
Tspan5	-0.829097	7.88e-05
Igf2r	-0.950217	7.9e-05
Nom1	-0.777586	7.9e-05
Nemf	0.992886	7.92e-05
Rassf1	-1.13272	7.94e-05
Trim28	-0.691697	8e-05
Sec13	0.653431	8e-05
Tfap2a	-0.764353	8e-05
Cth	3.43081	8.03e-05
Gak	-0.743371	8.04e-05
Sh3pxd2a	-1.12581	8.06e-05
Qk	-0.935638	8.06e-05
Nrn1	7.35825	8.06e-05
Cnih4	0.971425	8.09e-05
Stx3	-1.10485	8.12e-05
Fbn2	-7.19025	8.17e-05
Ptgfr	-8.00484	8.17e-05
Ids	0.965445	8.17e-05
Sf3a2	-1.36381	8.22e-05
Zcchc17	0.752539	8.24e-05
Ate1	0.674051	8.24e-05
Ndufs6	0.970815	8.24e-05
Gpm6a	0.918889	8.26e-05
Sf3b4	-0.839662	8.26e-05
Cmtm6	-1.16283	8.27e-05
Pnpla7	-1.75019	8.3e-05
Dtna	-1.06912	8.38e-05
Plin2	-1.07121	8.38e-05
Capn1	-2.02943	8.4e-05
Vars	-0.988736	8.43e-05
Pbxip1	-0.847353	8.44e-05
Arrb1	-2.54907	8.47e-05
Cebpb	-2.19142	8.49e-05
Svip	1.53366	8.49e-05
Ccdc88a	0.834161	8.49e-05
Atg9a	-0.943522	8.49e-05
Aar2	-0.787302	8.51e-05
Ep400	-0.732825	8.55e-05
Gsta2	1.82966	8.56e-05
Zfand1	1.92928	8.56e-05
Rbm19	-1.1026	8.58e-05
Tysnd1	1.72879	8.59e-05
Gmnn	1.53066	8.61e-05
Rbm38	-1.05895	8.65e-05
Wipi2	-0.989864	8.65e-05
Bcar3	-3.98901	8.68e-05
Gpaa1	-0.833835	8.68e-05
Cttnbp2	0.914437	8.71e-05
Plxnb1	-0.831571	8.71e-05
Abca12	-4.43599	8.71e-05
Cenpk	1.60751	8.71e-05
Vps11	-0.907137	8.71e-05
Mrpl12	0.627999	8.71e-05
Hexa	-0.704881	8.71e-05
Atf5	-1.52671	8.75e-05
Svil	-1.93715	8.89e-05
Stx2	-0.963984	8.98e-05
Tlcd4	0.898934	9e-05
Abcf2	-0.831906	9.06e-05
Atp5h	1.02077	9.07e-05
Ugp2	0.748521	9.07e-05
Gsta1	1.81578	9.07e-05
Snca	1.37971	9.08e-05
Tceal8	1.06173	9.16e-05
Spata13	-1.90799	9.19e-05
Cmas	0.858921	9.2e-05
Ypel2	-1.15308	9.34e-05
Fastkd3	0.959435	9.35e-05
Sdhaf3	1.67739	9.37e-05
Pnpo	-1.9246	9.42e-05
Clasp2	-0.823097	9.42e-05
Smpd1	0.716798	9.45e-05
Git1	-0.777692	9.46e-05
Grem1	4.77918	9.48e-05
Parvb	-1.14728	9.52e-05
Tdrd7	1.39496	9.52e-05
Inpp5a	0.605025	9.53e-05
Gm20605	-0.952771	9.53e-05
Mrtfb	-0.8506	9.59e-05
Cabin1	-0.763272	9.62e-05
Fam174b	0.784544	9.63e-05
Arap3	-5.73914	9.64e-05
Thoc7	0.957979	9.64e-05
Rab22a	-0.776669	9.67e-05
Snrpd1	1.20175	9.7e-05
Tmem116	-2.06139	9.75e-05
Rgl1	-0.925441	9.81e-05
Nus1	0.803369	9.82e-05
Ssh3	-1.17301	9.83e-05
1810014B01Rik	1.3462	9.88e-05
Zfp938	1.3846	9.99e-05
Stau1	-0.702329	0.000100411
Tifa	-1.07718	0.000100411
Sorl1	-6.99826	0.000100411
Cklf	0.977292	0.000100411
Zdhhc15	2.31891	0.000100698
Nagk	0.779151	0.000101379
S100a16	-4.72815	0.000101379
Slc35c1	-1.44399	0.000102365
Slc9a3r2	3.62106	0.000102497
Grcc10	0.884638	0.000102805
Tmem30a	0.737041	0.000102805
Mpped2	-1.01357	0.00010312
Akap17b	1.27279	0.000103907
Dpp7	-0.874532	0.000104027
Vmp1	0.773995	0.000104216
Nelfb	-0.751504	0.000105144
Ivd	0.968203	0.000105144
Mrpl11	0.743784	0.000105462
Ppp1r18	-1.20312	0.000105607
Prr13	-0.783448	0.000105779
Rpp21	0.858571	0.000106068
Tsc22d1	-0.803078	0.000106218
Cd82	-4.35339	0.000106218
Eml3	-1.00525	0.000106218
Impdh2	-0.727834	0.000106353
Eepd1	-4.40273	0.000106367
Runx1t1	1.88146	0.000107095
Mtbp	-0.899063	0.000107824
Gm29666	0.820682	0.000108145
Tmem106b	0.86243	0.000108365
Six1	2.16805	0.000108812
Ccdc73	2.2739	0.00010897
H4c18	4.00268	0.000109179
Anxa11	-1.14317	0.000110417
Eny2	0.813134	0.000110611
Rpl11	1.19589	0.0001107
Parp8	6.90384	0.0001107
Dzip1l	-0.915228	0.00011099
Ntrk3	-1.98439	0.000111208
Ehmt2	-0.749644	0.000111337
Aig1	1.16427	0.000111909
Ephb3	-4.39426	0.000111931
Arhgap44	4.54045	0.000112435
Rgs3	-1.37771	0.000112531
Ccdc74a	-1.96333	0.000112813
Mettl21a	1.11728	0.000113158
Baiap2l2	-6.36686	0.000113617
Kif3a	1.01637	0.000113821
Gas7	-1.62936	0.000113933
Sar1b	1.09754	0.00011414
Arhgef19	-4.71674	0.000114156
Sema4f	2.6735	0.000114335
Cnbp	0.986946	0.000114544
Tmem184c	1.06548	0.000115161
Pou3f1	-1.10956	0.000115322
Rtn4	0.652448	0.000115377
Lurap1l	-5.65821	0.000115377
Arpc5	0.581928	0.000116399
Arfgap2	-0.664184	0.000117198
Ndrg2	-3.05251	0.000117226
Tbc1d13	-0.664697	0.000117247
Mppe1	-1.42441	0.000117384
Atp6v1f	0.979359	0.000118204
Gins4	0.878588	0.000119359
Sox10	-0.964145	0.000119547
Top3b	-0.860287	0.000119557
Cst6	1.10672	0.000119557
Timm22	-1.87727	0.000119877
Rapsn	-1.00014	0.000121941
Dhx38	-0.808239	0.000122143
Rgs16	-2.71987	0.000122563
Sfrp1	-1.0126	0.000123393
Cd276	-1.37122	0.000123439
Nrxn2	-7.25249	0.000123685
Traf4	-0.906495	0.00012372
Bambi	1.44053	0.000123944
Gabarapl2	0.700904	0.000124116
Mgst3	2.62214	0.000124116
Ppfibp2	0.943515	0.000124123
Adgra2	-1.03465	0.000124469
Elp3	-0.625513	0.000124469
Pltp	-1.46562	0.000125177
Rraga	0.76319	0.000125202
Gtpbp1	-1.049	0.000125202
Arl2bp	0.610035	0.000125202
Myd88	-1.11095	0.000125283
Scaf11	-0.611885	0.000125367
Ptrhd1	0.911286	0.000125399
Hs1bp3	-0.807682	0.000125588
Atf7ip	-0.846916	0.000125614
Snrnp200	-0.778494	0.000125739
Me3	1.5574	0.00012596
Hdac5	-0.875595	0.00012596
H2bc8	3.77253	0.00012596
Rabggtb	0.909223	0.00012596
C1rl	1.27353	0.000126245
Stk11	-0.646645	0.000127434
Rbm12b1	-7.40416	0.000127503
Tril	1.51211	0.000127926
Ckap4	-1.2178	0.000127926
Klf4	-1.62626	0.000127984
Ctnnbip1	-0.686267	0.000128318
Gm29216	1.43555	0.000128486
Sntb2	-0.875896	0.000128565
Zc3h7b	-0.765711	0.000128745
Tmem144	3.51138	0.000128758
Scd1	-0.925743	0.000128844
Gtf3c4	-0.725213	0.000129021
Tomm5	1.15244	0.000129799
Hint1	1.26565	0.00013014
Rhoj	0.835164	0.00013014
Irak4	-0.916907	0.000130373
2310039H08Rik	0.753366	0.000130373
Ergic3	-0.694764	0.000130373
Necap1	0.834563	0.000131028
Scml2	6.6663	0.000131028
Abracl	1.13028	0.000131277
Usp22	-0.649001	0.000131855
Rmdn1	1.49469	0.00013189
Lyrm9	1.00146	0.000132065
Ndufb7	0.705989	0.000132232
Camk1	-0.603734	0.0001333
Alg6	0.84199	0.000133479
Nup214	-0.872855	0.000133479
Csf2ra	1.34054	0.000133621
Srd5a1	1.50846	0.000134047
Rab11fip5	1.84037	0.000134165
Tgif1	-2.02486	0.000134713
Dnm1	-3.04898	0.000135196
Acot13	1.39272	0.000135305
Msh3	0.909316	0.000135649
Maoa	0.65738	0.000135864
Socs5	-0.876741	0.000136622
Adcy1	-6.91561	0.000136895
Sppl3	-0.783224	0.0001369
Cdkl3	1.47227	0.0001369
Ube2e1	0.793885	0.00013739
Nxt2	1.00301	0.000137591
Phf23	-0.631162	0.000138194
Hmgxb3	-0.718245	0.000138839
Fahd1	1.5516	0.000139272
Arid2	-0.700969	0.000140172
Ccdc166	-6.50267	0.000140285
Rwdd1	0.936512	0.000140874
Man1b1	-0.800121	0.000141182
Arl6ip5	2.02517	0.000141212
Tfeb	1.28901	0.000141278
Fhod3	1.94252	0.000141297
Acacb	-2.59192	0.000144073
Capn6	-3.00646	0.000144073
Slc9a3r1	-0.907396	0.000145303
Immp1l	0.987213	0.00014575
Trip12	-0.632314	0.00014606
Vangl2	-0.809025	0.00014606
Cep135	1.19437	0.000146175
Dnajc19	1.44515	0.000146175
Yars	-0.94158	0.000146175
Pcbp2	-0.885279	0.000146407
Mmp2	0.649985	0.000146613
Thap3	1.11513	0.000146613
Bcorl1	-1.14968	0.000148617
Syt11	0.849714	0.000148699
H2bc11	4.24876	0.000150707
Olfr397	4.78732	0.000150707
H2ac11	2.79167	0.000151007
Serf1	1.72338	0.000151452
Gm3912	1.56843	0.000151452
Csrnp1	-2.13557	0.000151452
Farsb	-0.965391	0.000151452
Mgam2-ps	6.62593	0.000151452
Zfp87	1.14472	0.000151905
Pabpc4l	2.09403	0.000153427
Ttc1	0.791843	0.000154236
Sidt2	-0.878692	0.000154329
Scly	-0.641515	0.000154753
Map6	0.924115	0.000154753
Sptssa	0.845477	0.000154936
Cpsf1	-0.735619	0.000154972
Olfr1124	-0.863075	0.000155303
Rpl36a	1.83671	0.000157874
Eml2	0.84595	0.000157887
Scarb2	-0.683721	0.000158689
Stxbp5	0.885682	0.000159393
Pdha1	0.908463	0.000159393
Prxl2b	-3.75491	0.00015965
Wdr54	1.5834	0.000160866
Sfxn1	-0.669504	0.000161519
Otud6b	0.882562	0.000161993
4930522L14Rik	2.09173	0.000162226
Gdf11	-1.10704	0.000162837
Cript	0.910647	0.000162893
Fgfr3	-5.5063	0.000163923
Sfrp2	6.96807	0.000163923
Stx6	-1.08745	0.000164386
Timm9	0.898059	0.000164386
Necap2	-0.671808	0.000164561
Gnb2	-0.717062	0.000165143
Kansl2	-0.660207	0.000165185
mt-Atp8	1.6901	0.000166791
Pcdh1	-3.1854	0.000167182
Gdf15	3.78077	0.000167182
Prss12	-0.961377	0.000167652
Nkiras1	1.19721	0.000168307
Trappc2	0.929515	0.000169301
Rtf2	-0.788044	0.000169301
Rubcn	-0.801607	0.000169676
Dipk1a	-1.4378	0.000169868
Sema3c	-3.06036	0.000169959
Odf3l1	-1.54443	0.000169959
Cpe	0.819812	0.000170044
Ndufb11	1.12083	0.000170044
Morc4	1.38496	0.000170765
Rassf5	1.64594	0.000170942
Pus7l	-1.55535	0.000170942
Arpc3	0.671109	0.000171581
Eef2k	-1.11516	0.000171581
Spc24	-0.937791	0.000171896
Heatr6	-0.962847	0.00017287
Rps6kb1	0.699538	0.000172981
mt-Nd4l	1.97884	0.000173062
E330034G19Rik	0.978286	0.000173062
Dusp8	-1.61966	0.000173062
Prickle1	-0.924601	0.000173863
Palld	1.29649	0.000174015
Cdk2	0.752322	0.000174318
Fkbp9	0.8027	0.000174401
Scarb1	-1.3006	0.000174401
Ugt1a7c	-3.24106	0.000174891
Mcat	-1.19266	0.000175147
Phyh	1.45306	0.000176618
Sdcbp	0.76072	0.000176839
Gm5617	1.43463	0.000176974
Plekhm2	-0.68132	0.000177034
Zbtb16	-2.86594	0.000177034
Ralgps2	-1.16229	0.000177034
Fam50a	-0.801221	0.000178057
Bdh2	1.94752	0.000178057
Sqstm1	-0.840421	0.000178057
Mef2d	-0.595351	0.000178057
Gsta5	1.55203	0.000178913
P3h2	-1.08471	0.000178998
Arl8a	-0.77072	0.000179372
Ank	-1.41262	0.000180977
Smo	0.629507	0.000180977
Smurf1	-0.693497	0.000180977
Ndfip2	0.88527	0.000181183
Vbp1	0.890428	0.000181619
Rims1	2.43783	0.000182331
Cops7a	1.13299	0.00018261
Morn2	1.29721	0.00018321
Lrrc14	-0.690029	0.00018321
Ezr	-0.775763	0.000185187
Bin3	-0.885625	0.000185384
Tnfrsf10b	1.29724	0.000185519
Zfp345	-4.65011	0.000185519
B3glct	-0.79961	0.000185651
Akap8l	-1.59992	0.000186883
Pin4	1.44922	0.00018736
Gm1943	-1.595	0.000187622
Pafah2	0.817513	0.000189072
Cbln2	6.67928	0.000190115
Tmem167	0.719249	0.000190714
Map7d2	2.94183	0.000191603
Dlat	0.657444	0.000191961
H2-K1	1.44226	0.000191978
Rb1	0.74431	0.000192418
Slc25a5	1.25776	0.000193602
Fgfr1	-2.65851	0.000194712
H3c6	3.18738	0.000195598
Lrpap1	-0.670382	0.000195598
Snx27	-0.651756	0.000195796
Gm10330	-4.33931	0.000195796
Pla2g2e	1.14595	0.000195891
Rrbp1	-0.90488	0.000196587
Serbp1	0.724479	0.000197592
Ubl5	0.581529	0.000197592
Caprin1	-0.572266	0.000198165
Slc25a24	0.656808	0.000200644
Trappc1	1.15589	0.000201183
Bop1	-1.1114	0.000201375
Zfyve21	0.863697	0.000201585
Atp5a1	0.609342	0.000201585
Fbxl2	-2.04837	0.000201585
Ogfr	-0.992344	0.000201717
Enpp2	-1.73941	0.000202346
Ywhaq	0.682339	0.00020237
Trim30a	-2.69403	0.00020237
H2bc12	4.42084	0.000204915
Fnta	0.597143	0.000205207
Eif4b	-1.00547	0.000205829
Tepsin	1.08921	0.000206343
Prdx2	0.724604	0.000206533
Gtpbp10	1.64791	0.000207043
Cdc123	0.630698	0.000208865
Gamt	-0.951992	0.000209038
Gse1	-1.09093	0.000209038
Gorasp1	-0.982596	0.000209038
Edc3	-0.879464	0.000209367
Ghr	-1.32325	0.000209931
Usp3	-0.908572	0.000211146
Mt2	0.809743	0.000211441
2310034G01Rik	2.76842	0.000211694
Olfr259	-2.22334	0.000212313
Cfap36	1.35545	0.000214731
Timm8a1	0.919906	0.000214778
Erh	0.663324	0.000215153
Proser1	-0.788027	0.000215154
Alg1	-0.658277	0.000215154
Atp5g1	0.901848	0.000215198
Plxna1	0.762799	0.000215351
Tmem41a	-1.37517	0.000215533
Rftn1	-1.01495	0.000216606
Ube4b	-0.74247	0.000216606
Tspan4	-0.638288	0.000216606
Adcy7	1.42655	0.000216606
Acad8	0.96373	0.00021818
Elob	0.779836	0.000218814
Acap3	-1.27724	0.000218814
Mapk8ip1	-0.795756	0.000218887
Tmsb10	0.903982	0.000219314
Pard3	-0.777216	0.000219967
Gm14322	2.20581	0.000220522
Susd2	-4.19236	0.000221655
Tesk2	1.4902	0.000221892
Lcorl	0.864737	0.000221892
Slc7a2	-1.0745	0.000221892
Topors	0.557274	0.000221892
Tspo	-0.766036	0.000221892
Snrpe	0.94465	0.000222908
Cfl2	0.6275	0.000225606
Mdfi	-1.84472	0.000225868
Pacsin2	-0.715471	0.000226443
Cntln	0.977004	0.000226919
Polr3h	-0.933442	0.000228474
Fads1	-0.996988	0.000229793
Tbc1d5	-0.883884	0.00022992
Pitrm1	0.804507	0.000233003
Mocs2	1.06366	0.000233174
1810024B03Rik	1.49925	0.000233331
Agap1	-1.13938	0.000234601
Matn2	0.865503	0.00023594
Mef2b	-4.18099	0.00023594
Tmem161b	1.05349	0.00023594
Cdc37l1	0.665797	0.00023594
Smarcc2	-0.70134	0.00023594
Sarnp	0.697991	0.000236765
Foxk1	-0.841081	0.000236765
Sptlc2	0.63828	0.000236974
Ipo5	-0.633563	0.000237333
Fcgrt	-1.23547	0.000237466
Zbtb2	-1.01411	0.000237562
Espnl	-2.47881	0.000238214
Rdh14	1.14795	0.000238505
Ak5	1.27799	0.000239666
Mcf2l	-4.38374	0.000240595
Prpf6	-0.785418	0.000241427
Sall2	-0.927443	0.000241588
Lpar2	-3.679	0.000241588
Crlf2	-1.10633	0.000241643
Tsc22d4	-0.885592	0.000242575
Desi1	-0.723194	0.000243231
Scrib	-1.1385	0.000243543
1110004F10Rik	0.582465	0.0002444
Ap2a2	-0.677761	0.000245395
Mrps23	0.736147	0.000246157
Vma21	0.565158	0.000246232
Neu1	-0.788941	0.000246232
Chd4	-0.646542	0.000247569
Phf19	3.46329	0.000248375
Myo16	-7.0979	0.000248896
Maml3	-0.926175	0.000250235
Mocos	-1.3806	0.000250248
Rara	-1.2347	0.000250248
Hspe1	1.00817	0.00025279
Etfbkmt	2.26009	0.000253215
H13	-0.701344	0.000253287
Ogt	0.777458	0.000254993
Limk1	-1.01124	0.000255623
Washc3	0.987478	0.000255623
Polr3a	-0.824413	0.000255718
Lrrc40	0.829066	0.000255938
Ergic2	0.708791	0.000257865
Hikeshi	0.7959	0.000258359
Uros	1.5463	0.000259238
Cxcl10	-6.26508	0.000259453
Dvl3	-0.778841	0.000259659
Arap1	-1.37674	0.000259824
Sh2d3c	-6.7301	0.000262055
Cmpk1	0.990284	0.000262087
Gne	0.925239	0.00026405
Rnf111	-0.651853	0.00026405
Ntm	1.6893	0.000264183
Itga3	-2.35391	0.000265575
Uqcrq	1.20859	0.000266084
Sumf1	0.661879	0.000266444
Cox11	1.6067	0.000266444
Gaa	-0.863733	0.00026694
Rbm11	4.86296	0.00026694
Plvap	-3.20066	0.000269499
Ubr2	-0.608189	0.000269615
Wdr1	0.754937	0.000270355
Spr	0.69046	0.000270828
Rae1	-0.70294	0.000272107
Mcam	-1.63452	0.000272107
Angptl2	-0.771807	0.000272107
Endod1	-0.85634	0.000272107
Epha3	2.07903	0.000274359
Eif2ak4	-0.848433	0.000274858
Mapt	-0.766035	0.000275796
Ak1	2.05213	0.000275949
Has2	6.91881	0.000275949
Nedd4	-0.674744	0.000276264
Rab14	-0.614678	0.000277368
B330016D10Rik	1.73947	0.000278034
Ddx17	-0.603563	0.00027955
Tor2a	-0.806119	0.000280388
Dusp18	-0.718536	0.000280474
Cbr1	1.02005	0.000285629
Pcgf5	-0.87777	0.000285809
Itga7	-2.6826	0.000285848
Pcnx	0.656065	0.000285953
Mrpl23-ps1	0.905559	0.000285953
Sumo2	0.586119	0.000286251
Oc90	4.3597	0.000288353
Camk2b	-3.33519	0.000288353
Mtrr	1.00341	0.000288353
Elk3	-0.859632	0.000288353
Runx2	-1.45601	0.000288358
Smim15	0.904864	0.00029097
Rsrp1	0.758533	0.000291874
Castor1	-2.51864	0.000293813
Mpp6	0.71935	0.000293971
Dyrk1a	-0.561463	0.000294205
Fah	0.999893	0.000294416
Cmc4	1.27611	0.000294656
Cad	-0.797171	0.000294841
Taf6	-0.858285	0.000295647
Vamp8	0.960131	0.000296062
Afg3l2	-0.645171	0.000296236
Hspa4l	0.848192	0.000297022
Acy1	-1.81263	0.000297193
Pde10a	1.52011	0.000297285
Sdhaf1	1.13517	0.000298243
Dctn3	0.728848	0.00029844
Kmt5b	-0.674015	0.000298935
Prim1	0.935429	0.000299358
Drd1	-6.74816	0.000299358
Lyrm4	1.01714	0.000299358
Npepl1	0.846423	0.00030004
Kctd1	0.684116	0.000300115
H4c2	4.25049	0.000302546
H2ac6	1.66743	0.000302753
Nfil3	-1.5741	0.000302778
Rab7	0.547304	0.000303901
Nedd9	-1.69699	0.000303952
Susd1	1.82803	0.000304507
Plxnb2	-0.735034	0.000304507
Zfp965	1.96067	0.000304826
Zhx2	-1.07064	0.000305606
Rgs7bp	-1.44356	0.000306383
Agpat4	-0.711072	0.00030641
Gm45551	0.68685	0.00030862
Slc41a1	-1.02705	0.000311384
Slc4a11	4.04544	0.000311789
Ndufa12	0.827246	0.000311789
Tenm3	-6.36717	0.000311789
Rbfox2	-0.712489	0.000311789
Efcab6	-7.0729	0.000311789
Carnmt1	0.668064	0.000311819
Dad1	-0.693631	0.000311964
Tulp4	-0.580833	0.000313043
Apold1	-1.36305	0.000313472
Rhoa	-0.714279	0.000313957
Camk2n1	-0.637704	0.00031475
Epha2	-3.09574	0.000314936
Cux1	-0.599194	0.000316191
Rundc3b	2.97297	0.000316191
Acox1	-0.6518	0.00031882
Dynlt2b	1.22696	0.000319444
Mov10	-1.62407	0.000319698
Foxc1	0.637435	0.000321127
Atp6v1d	0.685809	0.000321882
Ppp1cb	-0.737819	0.000322453
Ndufb4	1.16399	0.000324427
Suclg2	0.717565	0.000325497
Bola2	1.0499	0.000325594
Pogz	-0.788181	0.000325594
Ddias	1.72821	0.000326194
Bhlhe40	-0.690191	0.000327002
Chd8	-0.667321	0.000327109
Hivep3	1.25522	0.000327433
R3hdm1	-0.631472	0.00032861
Naa20	1.07658	0.000328876
Nkd2	0.947499	0.000328933
Eloc	1.12589	0.000329118
B230219D22Rik	0.601798	0.00032944
Bmp4	2.66311	0.000329777
Dcaf8	-0.595309	0.000330011
Ehd3	0.752927	0.000331657
Rexo2	0.570477	0.000332055
Stxbp1	-1.10292	0.000333339
Rps6	1.14956	0.000333488
Zfp407	-1.03503	0.000333488
Enpp4	1.0549	0.000334539
Phactr1	-0.700435	0.000335249
Nt5dc2	-1.22547	0.000336429
Gmeb2	-1.04733	0.00033771
Acvr2b	-0.945071	0.000337755
Atf3	-3.31411	0.000338059
Fdx1	0.740284	0.00033843
Neo1	-0.729528	0.00033843
Fam102a	-1.0982	0.000341343
Acss1	-2.34959	0.000341921
Prrx1	4.74429	0.000341921
Slc6a17	0.59625	0.000345016
Nisch	-0.602162	0.000345016
Gpr137b	-0.551749	0.000345016
Tpp1	-0.621519	0.000345016
Tmem231	1.08879	0.000345016
Inpp1	1.01822	0.000345633
Slc44a5	1.33985	0.000345682
Adk	0.916524	0.000346035
Enpp5	0.737564	0.000346188
Tprn	-1.17907	0.000346188
Tmem256	1.23318	0.000347455
Ushbp1	1.15877	0.00034795
Tmem86a	-0.73701	0.000348517
Anks6	-2.43538	0.000348977
Ppm1k	0.768737	0.000349262
Sgk1	-2.04785	0.000349262
Gm2026	1.31865	0.00034985
Gatd3a	0.612614	0.00034995
Fut11	-0.970187	0.000351803
Mrpl17	0.681022	0.000352476
Pyroxd1	0.935298	0.000353248
Smim8	1.25826	0.000353751
Ufsp2	0.567489	0.000354963
Lgmn	-1.11798	0.000355007
Park7	0.592458	0.000355595
Igfbp5	-6.4151	0.00035633
Ube2k	-0.570299	0.00035633
Satb1	-6.41724	0.000356355
Pde3b	-3.01547	0.000358617
Ybx1	0.679935	0.00035876
H2az1	0.707603	0.000359506
Gm31520	6.29904	0.000362854
Fam83h	-1.34409	0.000362854
Magoh	0.75578	0.000362854
Itsn2	0.757037	0.000364372
Triqk	3.67938	0.000365771
Ptk2b	-5.67019	0.000365771
Ctdsp2	-0.630265	0.000366372
Ap1g2	-1.02281	0.000366577
Akap7	1.18258	0.000366911
1110065P20Rik	0.774113	0.000367153
Ppp1r9b	-0.874907	0.000368495
Glt1d1	-6.551	0.000373289
Spaca9	-3.60642	0.000373289
Tnk2	-0.74496	0.00037387
Emc8	0.641048	0.000374876
Rab1a	0.694093	0.000374876
Higd2a	0.711598	0.000377072
Rhox8	1.14262	0.000378222
Ctns	-1.07767	0.000379266
Plppr2	-2.08214	0.00037951
Uhrf1bp1	-0.81781	0.000379689
Pigf	0.946228	0.000379944
Cry2	-1.58727	0.000380937
C2cd5	0.889881	0.000381764
Eps8	0.782645	0.000381882
Oxct1	0.776224	0.000381882
Tprg	2.81468	0.000383754
Ier5	-0.973798	0.000386482
Camk2n2	1.05475	0.000386997
Rps7	1.3634	0.000387816
Bach1	-0.764945	0.000387971
Otud7b	-0.576525	0.000388186
Sulf1	-6.62666	0.000388743
Sin3b	0.52216	0.000389971
Fam168b	-0.591371	0.000390132
Abhd14a	-0.741838	0.000392158
Mrpl50	0.768996	0.00039228
Chmp2a	0.842871	0.000395682
Tmem258	0.563034	0.000396164
Fzd3	-1.15777	0.000396872
9530068E07Rik	0.598165	0.000398501
Sox6	-0.540174	0.000402878
Sucla2	0.685166	0.000403555
mt-Nd6	1.69444	0.000407305
Tapt1	-0.509421	0.000410633
Pald1	-1.06378	0.000410693
Synpo	-1.13297	0.00041118
Pan3	-0.611527	0.000411338
Ndufa1	1.74103	0.000413112
H2bc4	0.837519	0.000413749
Polr1d	0.679703	0.0004143
Dpm3	0.939817	0.000417341
Snrnp27	1.02781	0.000417649
Sh3bgrl	0.882798	0.000417995
Med13l	-0.734914	0.000419042
H4c3	3.23729	0.000419446
Lrp1	-1.19357	0.000419446
Flrt3	-1.03178	0.000420446
Kitl	1.45958	0.000421056
Lrrc20	-1.20537	0.000421137
Laptm4a	0.608995	0.000422719
Ipmk	0.757159	0.000427463
Glod4	0.883209	0.000429532
Scamp3	-0.843528	0.000432018
Smim13	0.989854	0.000435553
Itm2c	-0.680016	0.000435679
Zfp960	1.30292	0.000435679
Rpl21	1.16211	0.000435852
Zfp605	1.17227	0.000442542
Iars2	0.742976	0.000442542
Otub1	-0.712738	0.000442576
Med16	-0.596226	0.000442576
Zfp637	0.938956	0.000443274
Phb2	0.545688	0.000443524
Rpap1	-0.880601	0.000445779
Slc25a11	0.763138	0.000446263
Ano3	1.43394	0.000447379
Neurl2	-2.40272	0.000448795
Atp6ap2	0.683334	0.000452823
Smco4	0.677535	0.000454136
Rint1	0.853506	0.000454589
Ampd2	-1.09379	0.000455385
Ift74	1.26183	0.000455385
Fbxl6	-0.839017	0.000455979
Dync2h1	1.20261	0.000457153
Marchf8	0.635713	0.00045852
Btbd10	0.759215	0.000459672
Kdm2b	-0.967004	0.000462423
Pck2	-1.10922	0.000462423
Adamts4	-3.02913	0.000462602
Casp12	-2.15901	0.000462955
Ier2	-1.47013	0.000462955
Cog8	0.857308	0.000463491
Miga1	2.64415	0.000463998
Lpp	-0.54465	0.000464303
Cers5	-0.515886	0.000464303
Nat8l	-1.8518	0.000465307
Fth1	1.25158	0.000465307
Sri	0.494094	0.000465307
Fancl	1.25233	0.000469326
Zfp950	0.646417	0.000470073
Tmco1	0.708975	0.000470073
Vps18	-0.78186	0.000470073
Ubxn7	-1.07218	0.000470798
Ccdc126	1.22341	0.000474498
Phf14	0.616067	0.000477428
Alg14	0.687214	0.000480276
Rbm22	-0.782404	0.000481132
Tnfaip2	1.45281	0.000485218
Tpbg	-6.40801	0.000485332
Ccdc127	0.578731	0.000485332
Paip1	0.775757	0.000485909
Zfp518a	1.24113	0.000485909
Ccnq	0.665965	0.000487197
Tob2	-0.726384	0.000487412
Elfn1	-3.8597	0.000487412
Mrps16	0.90392	0.000488163
Hsf1	-0.776709	0.000488201
2610044O15Rik8	1.40978	0.000489217
Ankrd13a	-0.727525	0.000489481
Armcx1	6.68399	0.000495537
Tm2d2	0.740515	0.000496898
Smim26	1.64881	0.000497151
Nck2	0.776563	0.000500903
Rps20	1.58326	0.000501478
Hdgfl2	-0.556117	0.000501478
Ssr4	0.672204	0.000501804
Slc36a1	-1.0455	0.000501804
Ethe1	0.96736	0.000504146
Rps23	1.4419	0.00050425
Trf	0.667435	0.000504425
Braf	0.620625	0.000504634
Igsf3	-0.617818	0.000506147
Stc1	-3.33831	0.000506379
Trappc6b	0.808718	0.000507885
Nfe2l2	0.542226	0.000510153
Hadhb	0.537225	0.000510153
Rnase4	3.90611	0.000512201
Pdgfa	0.919593	0.000513216
Naf1	0.812384	0.000514951
Tmem141	-2.16048	0.000515802
Vegfa	-1.36157	0.000520039
Snx24	1.2742	0.000522069
Rasl11b	-1.31333	0.000522877
Ybx3	0.728253	0.000523092
Mafk	-0.882014	0.000523092
Iws1	-0.665248	0.000523265
Ak6	0.683769	0.000524622
Fam189a2	-3.61623	0.000525727
Cdv3	-0.529426	0.000528237
Mthfd2l	0.816349	0.000529922
Lrrc58	-0.528796	0.000532238
Cog2	0.620409	0.000534302
Nudt7	1.01961	0.000534623
Per1	-1.31314	0.000534623
Sec22a	1.02646	0.000535949
Ddt	0.56283	0.000535949
Axin1	-0.655595	0.000537071
Pcdhgc4	-0.676751	0.000538073
[truncated: 3,473 more rows]
